# Supplementary material for: Cytological and molecular characterizations of a novel 2A nullisomic line derived from a widely-grown wheat cultivar Zhoumai 18 conferring male sterility
Source: PeerJ. 2020 Oct 30;8:e10275. doi: 10.7717/peerj.10275 (PMC7605228; doi:10.7717/peerj.10275)
Supplement: Table S6 [file peerj-08-10275-s007.xls]

## Sheet: Sheet1
Table S6. The reads distribution among young spikes of T, M and D plants on 21 wheat chromosomes.
#Chr	Number of reads in T plants	Number of reads in M plants	Number of reads in D plants
1A	32630473	38392231	44520665
1B	25433669	30785550	34428208
1D	31761581	37394125	43091110
2A	35671948 (2A/Total=5.24％)	22523911 (2A/Total=2.86％)	2770825 (2A/Total=0.31％)
2B	35637252	42090433	48241042
2D	38561564	45131859	51821402
3A	30698542	37093716	42249676
3B	31283269	37610777	42801594
3D	31309477	37749904	42935799
4A	32917267	39284833	45138826
4B	29480559	35532306	40254218
4D	29768950	35628300	40477908
5A	36986077	44156300	51210979
5B	38771529	46127414	52979507
5D	39572675	47251157	54433398
6A	25718847	30605684	35241003
6B	28722008	34915025	39317787
6D	25820209	30839898	35646787
7A	30653552	30839898	42242443
7B	29100753	34650752	40115976
7D	32830266	39380742	45179698
Un	6874387	8220247	9061399
Total	680204854	786205062	884160250
