# Supplementary material for: Cytological and molecular characterizations of a novel 2A nullisomic line derived from a widely-grown wheat cultivar Zhoumai 18 conferring male sterility
Source: PeerJ. 2020 Oct 30;8:e10275. doi: 10.7717/peerj.10275 (PMC7605228; doi:10.7717/peerj.10275)
Supplement: Table S7 [file peerj-08-10275-s008.xls]

## Sheet: Sheet1
Table S7. The homeologous gene pair between genome 2A and the other genomes.
group_id	x_locus	y_locus	x_genome	y_genome	x_chr	y_chr
558	TraesCS2A01G592000	TraesCS2D01G562300	A	D	2	2
559	TraesCS2A01G443500	TraesCS2B01G464600	A	B	2	2
562	TraesCS2A01G324400	TraesCS2B01G357800	A	B	2	2
562	TraesCS2A01G324400	TraesCS2D01G338600	A	D	2	2
566	TraesCS2A01G517700	TraesCS2B01G546200	A	B	2	2
566	TraesCS2A01G517700	TraesCS2D01G519200	A	D	2	2
567	TraesCS2A01G504100	TraesCS2B01G532500	A	B	2	2
567	TraesCS2A01G504100	TraesCS2D01G504700	A	D	2	2
567	TraesCS2A01G504200	TraesCS2B01G532500	A	B	2	2
567	TraesCS2A01G504200	TraesCS2D01G504700	A	D	2	2
569	TraesCS2A01G570900	TraesCS2D01G582400	A	D	2	2
570	TraesCS2A01G349500	TraesCS2D01G347900	A	D	2	2
571	TraesCS2A01G376500	TraesCS3B01G524900	A	B	2	3
573	TraesCS2A01G365600	TraesCS6B01G307300	A	B	2	6
575	TraesCS2A01G313400	TraesCS2B01G332200	A	B	2	2
575	TraesCS2A01G313400	TraesCS2D01G311900	A	D	2	2
579	TraesCS2A01G238100	TraesCS4D01G165600	A	D	2	4
585	TraesCS2A01G285200	TraesCS2B01G302300	A	B	2	2
585	TraesCS2A01G285200	TraesCS2D01G283800	A	D	2	2
590	TraesCS2A01G266900	TraesCS2B01G275500	A	B	2	2
590	TraesCS2A01G266900	TraesCS2D01G257100	A	D	2	2
595	TraesCS2A01G186400	TraesCS2D01G201500	A	D	2	2
598	TraesCS2A01G093300	TraesCS2B01G107800	A	B	2	2
598	TraesCS2A01G093300	TraesCS2D01G092300	A	D	2	2
601	TraesCS2A01G148500	TraesCS2D01G528600	A	D	2	2
606	TraesCS2A01G091700	TraesCS2D01G090600	A	D	2	2
608	TraesCS2A01G079600	TraesCS2B01G094400	A	B	2	2
614	TraesCS2A01G060100	TraesCS2B01G073700	A	B	2	2
614	TraesCS2A01G060100	TraesCS2D01G059100	A	D	2	2
618	TraesCS2A01G077900	TraesCS2B01G092800	A	B	2	2
618	TraesCS2A01G077900	TraesCS2D01G075900	A	D	2	2
633	TraesCS2A01G154700	TraesCS1D01G070300	A	D	2	1
739	TraesCS2A01G362300	TraesCS2B01G380100	A	B	2	2
739	TraesCS2A01G362300	TraesCS2D01G359800	A	D	2	2
741	TraesCS2A01G518300	TraesCS2D01G519300	A	D	2	2
759	TraesCS2A01G554700	TraesCS2B01G589500	A	B	2	2
764	TraesCS2A01G340200	TraesCS7D01G198800	A	D	2	7
766	TraesCS2A01G155000	TraesCS2B01G180100	A	B	2	2
766	TraesCS2A01G155000	TraesCS2D01G160300	A	D	2	2
786	TraesCS2A01G513900	TraesCS2D01G515400	A	D	2	2
786	TraesCS2A01G513900	TraesCS2D01G515500	A	D	2	2
787	TraesCS2A01G047000	TraesCS2D01G045000	A	D	2	2
847	TraesCS2A01G542500	TraesCS2D01G543200	A	D	2	2
851	TraesCS2A01G460600	TraesCS2B01G482300	A	B	2	2
851	TraesCS2A01G460600	TraesCS2D01G460800	A	D	2	2
855	TraesCS2A01G340500	TraesCS6D01G135700	A	D	2	6
868	TraesCS2A01G143900	TraesCS2B01G168800	A	B	2	2
868	TraesCS2A01G143900	TraesCS2D01G147800	A	D	2	2
900	TraesCS2A01G421300	TraesCS2B01G440300	A	B	2	2
915	TraesCS2A01G288600	TraesCS2B01G305400	A	B	2	2
915	TraesCS2A01G288600	TraesCS2D01G286800	A	D	2	2
932	TraesCS2A01G314700	TraesCS2B01G332700	A	B	2	2
932	TraesCS2A01G314700	TraesCS2D01G312900	A	D	2	2
935	TraesCS2A01G002100	TraesCS2B01G020800	A	B	2	2
999	TraesCS2A01G300900	TraesCS2B01G317100	A	B	2	2
999	TraesCS2A01G300900	TraesCS2D01G299600	A	D	2	2
1016	TraesCS2A01G516000	TraesCS2B01G544500	A	B	2	2
1025	TraesCS2A01G283100	TraesCS2D01G281800	A	D	2	2
1038	TraesCS2A01G434500	TraesCS2B01G455600	A	B	2	2
1038	TraesCS2A01G434500	TraesCS2D01G432300	A	D	2	2
1050	TraesCS2A01G037700	TraesCS2D01G036700	A	D	2	2
1051	TraesCS2A01G457200	TraesCS2D01G458000	A	D	2	2
1051	TraesCS2A01G457200	TraesCS6B01G321800	A	B	2	6
1057	TraesCS2A01G208100	TraesCS2D01G451000	A	D	2	2
1443	TraesCS2A01G506900	TraesCS6B01G374500	A	B	2	6
1444	TraesCS2A01G442100	TraesCS4B01G355200	A	B	2	4
1445	TraesCS2A01G330800	TraesCS3B01G011100	A	B	2	3
1445	TraesCS2A01G330800	TraesCS6B01G357500	A	B	2	6
1445	TraesCS2A01G330800	TraesCS7B01G429500	A	B	2	7
1448	TraesCS2A01G263600	TraesCS2B01G278600	A	B	2	2
1448	TraesCS2A01G263600	TraesCS2D01G260400	A	D	2	2
1450	TraesCS2A01G081500	TraesCS2D01G079500	A	D	2	2
1489	TraesCS2A01G499200	TraesCS2B01G527400	A	B	2	2
1493	TraesCS2A01G388200	TraesCS2B01G406200	A	B	2	2
1493	TraesCS2A01G388200	TraesCS2D01G386000	A	D	2	2
1494	TraesCS2A01G461300	TraesCS2B01G483100	A	B	2	2
1497	TraesCS2A01G207300	TraesCS1D01G110500	A	D	2	1
1497	TraesCS2A01G207300	TraesCS3D01G293900	A	D	2	3
1516	TraesCS2A01G504800	TraesCS2B01G533000	A	B	2	2
1516	TraesCS2A01G504800	TraesCS2D01G505500	A	D	2	2
1517	TraesCS2A01G437400	TraesCS2B01G457900	A	B	2	2
1517	TraesCS2A01G437400	TraesCS2D01G434800	A	D	2	2
1520	TraesCS2A01G030800	TraesCS2B01G043200	A	B	2	2
1520	TraesCS2A01G030800	TraesCS2B01G044100	A	B	2	2
1520	TraesCS2A01G030800	TraesCS2B01G044500	A	B	2	2
1569	TraesCS2A01G080400	TraesCS2D01G077900	A	D	2	2
1569	TraesCS2A01G080400	TraesCS2D01G078000	A	D	2	2
1582	TraesCS2A01G020200	TraesCS6B01G418300	A	B	2	6
1671	TraesCS2A01G020700	TraesCS7B01G122500	A	B	2	7
1698	TraesCS2A01G196800	TraesCS2B01G224400	A	B	2	2
1698	TraesCS2A01G196800	TraesCS2D01G204800	A	D	2	2
1751	TraesCS2A01G562600	TraesCS2B01G624000	A	B	2	2
1759	TraesCS2A01G499300	TraesCS2B01G527500	A	B	2	2
1759	TraesCS2A01G499300	TraesCS2D01G499400	A	D	2	2
1766	TraesCS2A01G394800	TraesCS4B01G301000	A	B	2	4
1766	TraesCS2A01G394800	TraesCS6D01G291200	A	D	2	6
1776	TraesCS2A01G275300	TraesCS2B01G292900	A	B	2	2
1776	TraesCS2A01G275300	TraesCS2D01G274300	A	D	2	2
1782	TraesCS2A01G063600	TraesCS2B01G076300	A	B	2	2
1782	TraesCS2A01G063600	TraesCS2D01G061800	A	D	2	2
1788	TraesCS2A01G261300	TraesCS2B01G280900	A	B	2	2
1788	TraesCS2A01G261300	TraesCS2D01G262600	A	D	2	2
1814	TraesCS2A01G205200	TraesCS2B01G232600	A	B	2	2
1814	TraesCS2A01G205200	TraesCS2D01G210900	A	D	2	2
1852	TraesCS2A01G455700	TraesCS2B01G477700	A	B	2	2
1852	TraesCS2A01G455700	TraesCS2D01G456000	A	D	2	2
1872	TraesCS2A01G301400	TraesCS2B01G317500	A	B	2	2
1872	TraesCS2A01G301400	TraesCS2D01G300000	A	D	2	2
1874	TraesCS2A01G162400	TraesCS2B01G187900	A	B	2	2
1874	TraesCS2A01G162400	TraesCS2D01G169100	A	D	2	2
1894	TraesCS2A01G401700	TraesCS2B01G419800	A	B	2	2
1894	TraesCS2A01G401700	TraesCS2D01G399100	A	D	2	2
1895	TraesCS2A01G127400	TraesCS2B01G149300	A	B	2	2
1927	TraesCS2A01G093800	TraesCS2B01G108300	A	B	2	2
1938	TraesCS2A01G392500	TraesCS2B01G410700	A	B	2	2
1938	TraesCS2A01G392500	TraesCS2D01G390600	A	D	2	2
1941	TraesCS2A01G523000	TraesCS2B01G552700	A	B	2	2
1941	TraesCS2A01G523000	TraesCS2D01G524900	A	D	2	2
1942	TraesCS2A01G100700	TraesCS2B01G117900	A	B	2	2
1942	TraesCS2A01G100700	TraesCS2D01G100200	A	D	2	2
1958	TraesCS2A01G215700	TraesCS2B01G240700	A	B	2	2
1958	TraesCS2A01G215700	TraesCS2D01G221300	A	D	2	2
1987	TraesCS2A01G533300	TraesCS2B01G562900	A	B	2	2
1987	TraesCS2A01G533300	TraesCS2D01G535200	A	D	2	2
1998	TraesCS2A01G283400	TraesCS2D01G282100	A	D	2	2
2044	TraesCS2A01G345700	TraesCS2D01G344400	A	D	2	2
2064	TraesCS2A01G349900	TraesCS2B01G368300	A	B	2	2
2064	TraesCS2A01G349900	TraesCS2D01G348300	A	D	2	2
2171	TraesCS2A01G181700	TraesCS2D01G298700	A	D	2	2
2171	TraesCS2A01G181700	TraesCS7B01G199600	A	B	2	7
2171	TraesCS2A01G236000	TraesCS2D01G298700	A	D	2	2
2171	TraesCS2A01G236000	TraesCS7B01G199600	A	B	2	7
2196	TraesCS2A01G510600	TraesCS1D01G351100	A	D	2	1
2206	TraesCS2A01G487200	TraesCS2B01G514300	A	B	2	2
2254	TraesCS2A01G081800	TraesCS7B01G032000	A	B	2	7
2264	TraesCS2A01G094900	TraesCS2B01G110000	A	B	2	2
2265	TraesCS2A01G095000	TraesCS2B01G110100	A	B	2	2
2265	TraesCS2A01G095000	TraesCS2D01G093400	A	D	2	2
2270	TraesCS2A01G410300	TraesCS2B01G428900	A	B	2	2
2270	TraesCS2A01G410300	TraesCS2D01G407600	A	D	2	2
2304	TraesCS2A01G457400	TraesCS6B01G261200	A	B	2	6
2416	TraesCS2A01G040000	TraesCS7B01G268500	A	B	2	7
2416	TraesCS2A01G040000	TraesCS7D01G363800	A	D	2	7
2427	TraesCS2A01G576300	TraesCS3B01G077800	A	B	2	3
2431	TraesCS2A01G547400	TraesCS2B01G578100	A	B	2	2
2431	TraesCS2A01G547400	TraesCS2D01G548400	A	D	2	2
2458	TraesCS2A01G011800	TraesCS2D01G012600	A	D	2	2
2465	TraesCS2A01G103700	TraesCS4D01G243800	A	D	2	4
2476	TraesCS2A01G416100	TraesCS2B01G134800	A	B	2	2
2493	TraesCS2A01G511500	TraesCS2B01G539800	A	B	2	2
2514	TraesCS2A01G192300	TraesCS2B01G214200	A	B	2	2
2514	TraesCS2A01G192300	TraesCS2D01G195200	A	D	2	2
2532	TraesCS2A01G173700	TraesCS2B01G200200	A	B	2	2
2571	TraesCS2A01G029900	TraesCS2B01G045100	A	B	2	2
2576	TraesCS2A01G525900	TraesCS2B01G556000	A	B	2	2
2576	TraesCS2A01G525900	TraesCS2D01G528700	A	D	2	2
2578	TraesCS2A01G005600	TraesCS2B01G016400	A	B	2	2
2578	TraesCS2A01G005600	TraesCS2D01G006100	A	D	2	2
2582	TraesCS2A01G306000	TraesCS2B01G322700	A	B	2	2
2582	TraesCS2A01G306000	TraesCS2D01G304400	A	D	2	2
2585	TraesCS2A01G443400	TraesCS2B01G464500	A	B	2	2
2585	TraesCS2A01G443400	TraesCS2D01G442600	A	D	2	2
2593	TraesCS2A01G524800	TraesCS2B01G554800	A	B	2	2
2593	TraesCS2A01G524800	TraesCS2D01G527700	A	D	2	2
2600	TraesCS2A01G526600	TraesCS1D01G168300	A	D	2	1
2607	TraesCS2A01G054000	TraesCS2D01G595300	A	D	2	2
2617	TraesCS2A01G033400	TraesCS2B01G047200	A	B	2	2
2621	TraesCS2A01G534000	TraesCS2B01G564300	A	B	2	2
2621	TraesCS2A01G534000	TraesCS2D01G536300	A	D	2	2
2628	TraesCS2A01G186000	TraesCS2B01G400800	A	B	2	2
2646	TraesCS2A01G246400	TraesCS2B01G270700	A	B	2	2
2646	TraesCS2A01G246400	TraesCS2D01G248800	A	D	2	2
2755	TraesCS2A01G046800	TraesCS2B01G058600	A	B	2	2
2776	TraesCS2A01G557500	TraesCS3B01G339900	A	B	2	3
2810	TraesCS2A01G263900	TraesCS2B01G278300	A	B	2	2
2810	TraesCS2A01G263900	TraesCS2D01G260100	A	D	2	2
2826	TraesCS2A01G549100	TraesCS1B01G464400	A	B	2	1
2826	TraesCS2A01G549100	TraesCS2D01G514000	A	D	2	2
2826	TraesCS2A01G549100	TraesCS6D01G341600	A	D	2	6
2830	TraesCS2A01G473700	TraesCS2B01G497300	A	B	2	2
2830	TraesCS2A01G473700	TraesCS2D01G473400	A	D	2	2
2872	TraesCS2A01G030300	TraesCS2B01G042900	A	B	2	2
2872	TraesCS2A01G030300	TraesCS2B01G044600	A	B	2	2
2872	TraesCS2A01G030900	TraesCS2B01G042900	A	B	2	2
2872	TraesCS2A01G030900	TraesCS2B01G044600	A	B	2	2
2925	TraesCS2A01G580500	TraesCS2B01G607500	A	B	2	2
2925	TraesCS2A01G580500	TraesCS2D01G567800	A	D	2	2
2954	TraesCS2A01G082700	TraesCS2B01G096900	A	B	2	2
2954	TraesCS2A01G082700	TraesCS2D01G080700	A	D	2	2
2954	TraesCS2A01G082800	TraesCS2B01G096900	A	B	2	2
2954	TraesCS2A01G082800	TraesCS2D01G080700	A	D	2	2
2954	TraesCS2A01G082900	TraesCS2B01G096900	A	B	2	2
2954	TraesCS2A01G082900	TraesCS2D01G080700	A	D	2	2
2967	TraesCS2A01G320600	TraesCS2B01G362100	A	B	2	2
2967	TraesCS2A01G320600	TraesCS2D01G341300	A	D	2	2
2968	TraesCS2A01G472900	TraesCS2B01G495600	A	B	2	2
2968	TraesCS2A01G472900	TraesCS2D01G472600	A	D	2	2
2988	TraesCS2A01G570100	TraesCS2D01G580900	A	D	2	2
2989	TraesCS2A01G569900	TraesCS2D01G580600	A	D	2	2
3015	TraesCS2A01G230900	TraesCS7D01G449100	A	D	2	7
3017	TraesCS2A01G105800	TraesCS2B01G122800	A	B	2	2
3023	TraesCS2A01G558800	TraesCS2B01G621200	A	B	2	2
3023	TraesCS2A01G558800	TraesCS2D01G299200	A	D	2	2
3033	TraesCS2A01G157500	TraesCS2B01G183000	A	B	2	2
3033	TraesCS2A01G157500	TraesCS2D01G163400	A	D	2	2
3036	TraesCS2A01G213400	TraesCS2B01G238200	A	B	2	2
3036	TraesCS2A01G213400	TraesCS2D01G219400	A	D	2	2
3055	TraesCS2A01G118800	TraesCS3B01G352000	A	B	2	3
3055	TraesCS2A01G237100	TraesCS3B01G352000	A	B	2	3
3057	TraesCS2A01G517600	TraesCS2B01G546100	A	B	2	2
3057	TraesCS2A01G517600	TraesCS2D01G519100	A	D	2	2
3065	TraesCS2A01G544400	TraesCS2B01G574500	A	B	2	2
3065	TraesCS2A01G544400	TraesCS2D01G545400	A	D	2	2
3078	TraesCS2A01G411000	TraesCS2B01G429900	A	B	2	2
3078	TraesCS2A01G411000	TraesCS2D01G408400	A	D	2	2
3101	TraesCS2A01G104200	TraesCS2B01G121200	A	B	2	2
3101	TraesCS2A01G104200	TraesCS2D01G103900	A	D	2	2
3102	TraesCS2A01G485900	TraesCS2B01G512600	A	B	2	2
3102	TraesCS2A01G485900	TraesCS2D01G485900	A	D	2	2
3106	TraesCS2A01G461200	TraesCS2B01G483000	A	B	2	2
3106	TraesCS2A01G461200	TraesCS2D01G461400	A	D	2	2
3119	TraesCS2A01G393200	TraesCS7D01G111400	A	D	2	7
3120	TraesCS2A01G422700	TraesCS2B01G441200	A	B	2	2
3120	TraesCS2A01G422700	TraesCS2D01G419100	A	D	2	2
3136	TraesCS2A01G030400	TraesCS2B01G044400	A	B	2	2
3137	TraesCS2A01G031200	TraesCS2B01G043100	A	B	2	2
3137	TraesCS2A01G031200	TraesCS2B01G043900	A	B	2	2
3153	TraesCS2A01G201400	TraesCS2D01G213800	A	D	2	2
3157	TraesCS2A01G289500	TraesCS2B01G306100	A	B	2	2
3157	TraesCS2A01G289500	TraesCS2D01G287500	A	D	2	2
3181	TraesCS2A01G547600	TraesCS2B01G578300	A	B	2	2
3181	TraesCS2A01G547600	TraesCS2D01G548700	A	D	2	2
3199	TraesCS2A01G184100	TraesCS2B01G223300	A	B	2	2
3199	TraesCS2A01G184100	TraesCS2D01G203700	A	D	2	2
3213	TraesCS2A01G185400	TraesCS2B01G221900	A	B	2	2
3213	TraesCS2A01G185400	TraesCS2D01G202300	A	D	2	2
3222	TraesCS2A01G165300	TraesCS2B01G191600	A	B	2	2
3222	TraesCS2A01G165300	TraesCS2D01G172600	A	D	2	2
3223	TraesCS2A01G153400	TraesCS2B01G178500	A	B	2	2
3223	TraesCS2A01G153400	TraesCS2D01G158700	A	D	2	2
3225	TraesCS2A01G248000	TraesCS5B01G259000	A	B	2	5
3225	TraesCS2A01G248000	TraesCS5D01G268100	A	D	2	5
3230	TraesCS2A01G411800	TraesCS2B01G430400	A	B	2	2
3230	TraesCS2A01G411800	TraesCS2D01G409100	A	D	2	2
3258	TraesCS2A01G306300	TraesCS2B01G323000	A	B	2	2
3258	TraesCS2A01G306300	TraesCS2D01G304700	A	D	2	2
3264	TraesCS2A01G580400	TraesCS2B01G607600	A	B	2	2
3264	TraesCS2A01G580400	TraesCS2D01G592800	A	D	2	2
3265	TraesCS2A01G275900	TraesCS2B01G293600	A	B	2	2
3265	TraesCS2A01G275900	TraesCS2D01G274900	A	D	2	2
3274	TraesCS2A01G158500	TraesCS2B01G184200	A	B	2	2
3274	TraesCS2A01G158500	TraesCS2D01G165400	A	D	2	2
3310	TraesCS2A01G457700	TraesCS2B01G480100	A	B	2	2
3310	TraesCS2A01G457700	TraesCS2D01G458400	A	D	2	2
3313	TraesCS2A01G254500	TraesCS2D01G255000	A	D	2	2
3330	TraesCS2A01G290400	TraesCS2B01G306900	A	B	2	2
3330	TraesCS2A01G290400	TraesCS2D01G288300	A	D	2	2
3333	TraesCS2A01G059400	TraesCS2B01G069400	A	B	2	2
3333	TraesCS2A01G059400	TraesCS2D01G058900	A	D	2	2
3365	TraesCS2A01G184300	TraesCS2B01G223100	A	B	2	2
3365	TraesCS2A01G184300	TraesCS2D01G203400	A	D	2	2
3378	TraesCS2A01G563300	TraesCS2B01G623300	A	B	2	2
3378	TraesCS2A01G563300	TraesCS2D01G572100	A	D	2	2
3383	TraesCS2A01G331500	TraesCS2B01G350700	A	B	2	2
3383	TraesCS2A01G331500	TraesCS2D01G331400	A	D	2	2
3400	TraesCS2A01G213800	TraesCS2B01G238800	A	B	2	2
3408	TraesCS2A01G045100	TraesCS2B01G057300	A	B	2	2
3408	TraesCS2A01G045100	TraesCS2D01G043700	A	D	2	2
3414	TraesCS2A01G500600	TraesCS2B01G528500	A	B	2	2
3414	TraesCS2A01G500600	TraesCS2D01G500800	A	D	2	2
3429	TraesCS2A01G295700	TraesCS2B01G312200	A	B	2	2
3429	TraesCS2A01G295700	TraesCS2D01G293600	A	D	2	2
3433	TraesCS2A01G436300	TraesCS2B01G456900	A	B	2	2
3433	TraesCS2A01G436300	TraesCS2D01G433600	A	D	2	2
3434	TraesCS2A01G542900	TraesCS2B01G572700	A	B	2	2
3434	TraesCS2A01G542900	TraesCS2D01G544100	A	D	2	2
3437	TraesCS2A01G379600	TraesCS2B01G396500	A	B	2	2
3437	TraesCS2A01G379600	TraesCS2D01G375800	A	D	2	2
3438	TraesCS2A01G286900	TraesCS2B01G303900	A	B	2	2
3438	TraesCS2A01G286900	TraesCS2D01G285500	A	D	2	2
3439	TraesCS2A01G009300	TraesCS2D01G010200	A	D	2	2
3520	TraesCS2A01G003800	TraesCS2D01G483900	A	D	2	2
3520	TraesCS2A01G003800	TraesCS4B01G091700	A	B	2	4
3547	TraesCS2A01G000300	TraesCS2B01G023700	A	B	2	2
3547	TraesCS2A01G000300	TraesCS2D01G000400	A	D	2	2
3549	TraesCS2A01G054400	TraesCS4B01G149800	A	B	2	4
3549	TraesCS2A01G054400	TraesCS7D01G023900	A	D	2	7
3549	TraesCS2A01G450800	TraesCS4B01G149800	A	B	2	4
3549	TraesCS2A01G450800	TraesCS7D01G023900	A	D	2	7
3554	TraesCS2A01G321500	TraesCS2B01G361000	A	B	2	2
3554	TraesCS2A01G321500	TraesCS2D01G342000	A	D	2	2
3558	TraesCS2A01G024200	TraesCS2B01G036700	A	B	2	2
3558	TraesCS2A01G024200	TraesCS2D01G026700	A	D	2	2
3558	TraesCS2A01G024200	TraesCS7B01G446500	A	B	2	7
3558	TraesCS2A01G024200	TraesCS7B01G446600	A	B	2	7
3562	TraesCS2A01G518200	TraesCS2B01G546300	A	B	2	2
3573	TraesCS2A01G572800	TraesCS2B01G614800	A	B	2	2
3573	TraesCS2A01G572800	TraesCS2D01G584100	A	D	2	2
3578	TraesCS2A01G503600	TraesCS2B01G531900	A	B	2	2
3578	TraesCS2A01G503600	TraesCS2D01G504200	A	D	2	2
3580	TraesCS2A01G267200	TraesCS2B01G275300	A	B	2	2
3580	TraesCS2A01G267200	TraesCS2D01G256900	A	D	2	2
3582	TraesCS2A01G351200	TraesCS2B01G369300	A	B	2	2
3582	TraesCS2A01G351200	TraesCS2D01G349200	A	D	2	2
3590	TraesCS2A01G576000	TraesCS2B01G611400	A	B	2	2
3590	TraesCS2A01G576000	TraesCS2B01G611500	A	B	2	2
3590	TraesCS2A01G576000	TraesCS2D01G586700	A	D	2	2
3617	TraesCS2A01G383700	TraesCS2B01G400700	A	B	2	2
3617	TraesCS2A01G383700	TraesCS2D01G379800	A	D	2	2
3622	TraesCS2A01G528500	TraesCS2B01G558900	A	B	2	2
3626	TraesCS2A01G154200	TraesCS2D01G159700	A	D	2	2
3633	TraesCS2A01G262400	TraesCS2B01G279700	A	B	2	2
3633	TraesCS2A01G262400	TraesCS2D01G261600	A	D	2	2
3645	TraesCS2A01G259800	TraesCS2B01G282100	A	B	2	2
3645	TraesCS2A01G259800	TraesCS2D01G263700	A	D	2	2
3650	TraesCS2A01G014600	TraesCS6B01G033500	A	B	2	6
3655	TraesCS2A01G263800	TraesCS2B01G278400	A	B	2	2
3655	TraesCS2A01G263800	TraesCS2D01G260200	A	D	2	2
3657	TraesCS2A01G002600	TraesCS2D01G590400	A	D	2	2
3657	TraesCS2A01G002600	TraesCS3B01G052900	A	B	2	3
3660	TraesCS2A01G202500	TraesCS1B01G324400	A	B	2	1
3662	TraesCS2A01G008400	TraesCS2B01G101400	A	B	2	2
3662	TraesCS2A01G008400	TraesCS2D01G010000	A	D	2	2
3728	TraesCS2A01G172900	TraesCS1B01G462100	A	B	2	1
3728	TraesCS2A01G172900	TraesCS2B01G282600	A	B	2	2
3750	TraesCS2A01G122500	TraesCS2D01G125300	A	D	2	2
3764	TraesCS2A01G373900	TraesCS2B01G391100	A	B	2	2
3764	TraesCS2A01G373900	TraesCS2D01G370200	A	D	2	2
3779	TraesCS2A01G526500	TraesCS2B01G556800	A	B	2	2
3779	TraesCS2A01G526500	TraesCS2D01G529200	A	D	2	2
3808	TraesCS2A01G132400	TraesCS2B01G155000	A	B	2	2
3808	TraesCS2A01G132400	TraesCS2D01G134400	A	D	2	2
3810	TraesCS2A01G284900	TraesCS2B01G510300	A	B	2	2
3812	TraesCS2A01G362400	TraesCS2B01G380300	A	B	2	2
3812	TraesCS2A01G362400	TraesCS2D01G359900	A	D	2	2
3828	TraesCS2A01G136600	TraesCS2B01G160500	A	B	2	2
3828	TraesCS2A01G136600	TraesCS2D01G139300	A	D	2	2
3829	TraesCS2A01G262300	TraesCS2B01G279800	A	B	2	2
3829	TraesCS2A01G262300	TraesCS2D01G261700	A	D	2	2
3831	TraesCS2A01G490500	TraesCS2B01G519000	A	B	2	2
3831	TraesCS2A01G490500	TraesCS2D01G491000	A	D	2	2
3833	TraesCS2A01G271800	TraesCS2B01G290000	A	B	2	2
3833	TraesCS2A01G271800	TraesCS2D01G270400	A	D	2	2
3845	TraesCS2A01G124000	TraesCS2B01G145900	A	B	2	2
3845	TraesCS2A01G124000	TraesCS2D01G126800	A	D	2	2
3859	TraesCS2A01G136200	TraesCS2B01G160300	A	B	2	2
3859	TraesCS2A01G136200	TraesCS2D01G140400	A	D	2	2
3859	TraesCS2A01G137600	TraesCS2B01G160300	A	B	2	2
3859	TraesCS2A01G137600	TraesCS2D01G140400	A	D	2	2
3866	TraesCS2A01G476000	TraesCS2B01G499700	A	B	2	2
3867	TraesCS2A01G327500	TraesCS2B01G354500	A	B	2	2
3867	TraesCS2A01G327500	TraesCS2D01G335400	A	D	2	2
3901	TraesCS2A01G127700	TraesCS2B01G149700	A	B	2	2
3901	TraesCS2A01G127700	TraesCS2D01G130100	A	D	2	2
3903	TraesCS2A01G254400	TraesCS2D01G254900	A	D	2	2
3911	TraesCS2A01G287800	TraesCS2B01G304500	A	B	2	2
3911	TraesCS2A01G287800	TraesCS2D01G286100	A	D	2	2
3934	TraesCS2A01G255500	TraesCS2B01G287000	A	B	2	2
3934	TraesCS2A01G255500	TraesCS2D01G267200	A	D	2	2
3947	TraesCS2A01G524500	TraesCS2B01G554600	A	B	2	2
3947	TraesCS2A01G524500	TraesCS2D01G527500	A	D	2	2
3956	TraesCS2A01G316600	TraesCS2B01G334700	A	B	2	2
3956	TraesCS2A01G316600	TraesCS2D01G314500	A	D	2	2
3970	TraesCS2A01G267300	TraesCS2B01G275400	A	B	2	2
3970	TraesCS2A01G267300	TraesCS2D01G256800	A	D	2	2
3975	TraesCS2A01G337000	TraesCS2B01G344900	A	B	2	2
3975	TraesCS2A01G337000	TraesCS2D01G325900	A	D	2	2
3976	TraesCS2A01G434300	TraesCS2B01G455400	A	B	2	2
3976	TraesCS2A01G434300	TraesCS2D01G432100	A	D	2	2
3981	TraesCS2A01G374700	TraesCS2B01G391700	A	B	2	2
3981	TraesCS2A01G374700	TraesCS2D01G371100	A	D	2	2
3987	TraesCS2A01G159100	TraesCS2B01G184700	A	B	2	2
3987	TraesCS2A01G159100	TraesCS2D01G166200	A	D	2	2
3995	TraesCS2A01G328700	TraesCS2B01G353600	A	B	2	2
3995	TraesCS2A01G328700	TraesCS2D01G334000	A	D	2	2
3997	TraesCS2A01G371900	TraesCS2B01G389000	A	B	2	2
3997	TraesCS2A01G371900	TraesCS2D01G368200	A	D	2	2
3999	TraesCS2A01G114900	TraesCS2B01G134100	A	B	2	2
3999	TraesCS2A01G114900	TraesCS2D01G115700	A	D	2	2
4004	TraesCS2A01G138200	TraesCS2B01G162100	A	B	2	2
4004	TraesCS2A01G138200	TraesCS2D01G141200	A	D	2	2
4005	TraesCS2A01G346900	TraesCS2B01G365200	A	B	2	2
4013	TraesCS2A01G004600	TraesCS2D01G004200	A	D	2	2
4024	TraesCS2A01G476400	TraesCS2B01G500000	A	B	2	2
4024	TraesCS2A01G476400	TraesCS2D01G476300	A	D	2	2
4025	TraesCS2A01G551600	TraesCS2B01G582800	A	B	2	2
4025	TraesCS2A01G551600	TraesCS2D01G552700	A	D	2	2
4026	TraesCS2A01G498700	TraesCS2B01G526800	A	B	2	2
4026	TraesCS2A01G498700	TraesCS2D01G499000	A	D	2	2
4029	TraesCS2A01G016300	TraesCS2B01G024300	A	B	2	2
4029	TraesCS2A01G016300	TraesCS2D01G017800	A	D	2	2
4039	TraesCS2A01G238800	TraesCS2B01G261100	A	B	2	2
4039	TraesCS2A01G238800	TraesCS2D01G234900	A	D	2	2
4044	TraesCS2A01G383900	TraesCS2B01G400900	A	B	2	2
4051	TraesCS2A01G134700	TraesCS2B01G158100	A	B	2	2
4051	TraesCS2A01G134700	TraesCS2D01G136800	A	D	2	2
4088	TraesCS2A01G480000	TraesCS2B01G504800	A	B	2	2
4088	TraesCS2A01G480000	TraesCS2D01G479200	A	D	2	2
4089	TraesCS2A01G441600	TraesCS2B01G461800	A	B	2	2
4089	TraesCS2A01G441600	TraesCS2D01G439300	A	D	2	2
4107	TraesCS2A01G183600	TraesCS2B01G210200	A	B	2	2
4107	TraesCS2A01G183600	TraesCS2D01G191500	A	D	2	2
4111	TraesCS2A01G022900	TraesCS2D01G022600	A	D	2	2
4135	TraesCS2A01G363700	TraesCS2B01G381700	A	B	2	2
4135	TraesCS2A01G363700	TraesCS2D01G361500	A	D	2	2
4136	TraesCS2A01G051700	TraesCS2B01G066000	A	B	2	2
4137	TraesCS2A01G326900	TraesCS2B01G355100	A	B	2	2
4137	TraesCS2A01G326900	TraesCS2D01G336000	A	D	2	2
4215	TraesCS2A01G569400	TraesCS2B01G627600	A	B	2	2
4215	TraesCS2A01G569400	TraesCS2D01G580300	A	D	2	2
4228	TraesCS2A01G592700	TraesCS2B01G591500	A	B	2	2
4228	TraesCS2A01G592700	TraesCS2D01G561800	A	D	2	2
4228	TraesCS2A01G592900	TraesCS2B01G591500	A	B	2	2
4228	TraesCS2A01G592900	TraesCS2D01G561800	A	D	2	2
4232	TraesCS2A01G579000	TraesCS2D01G598700	A	D	2	2
4237	TraesCS2A01G576900	TraesCS2B01G610500	A	B	2	2
4237	TraesCS2A01G576900	TraesCS2D01G587800	A	D	2	2
4243	TraesCS2A01G388000	TraesCS2B01G405900	A	B	2	2
4243	TraesCS2A01G388000	TraesCS2D01G385800	A	D	2	2
4245	TraesCS2A01G270900	TraesCS2B01G463700	A	B	2	2
4245	TraesCS2A01G270900	TraesCS5B01G046800	A	B	2	5
4245	TraesCS2A01G270900	TraesCS5B01G355500	A	B	2	5
4245	TraesCS2A01G270900	TraesCS6B01G150700	A	B	2	6
4257	TraesCS2A01G262600	TraesCS2B01G279500	A	B	2	2
4257	TraesCS2A01G262600	TraesCS2D01G261400	A	D	2	2
4271	TraesCS2A01G410900	TraesCS2B01G429800	A	B	2	2
4271	TraesCS2A01G410900	TraesCS2D01G408300	A	D	2	2
4279	TraesCS2A01G569000	TraesCS2B01G627900	A	B	2	2
4279	TraesCS2A01G569000	TraesCS2D01G503600	A	D	2	2
4279	TraesCS2A01G569000	TraesCS2D01G579900	A	D	2	2
4300	TraesCS2A01G487700	TraesCS2B01G515200	A	B	2	2
4300	TraesCS2A01G487700	TraesCS2B01G515300	A	B	2	2
4300	TraesCS2A01G487700	TraesCS2D01G488000	A	D	2	2
4300	TraesCS2A01G487700	TraesCS2D01G585800	A	D	2	2
4302	TraesCS2A01G323800	TraesCS2B01G358500	A	B	2	2
4302	TraesCS2A01G323800	TraesCS2D01G338400	A	D	2	2
4308	TraesCS2A01G076800	TraesCS2B01G091700	A	B	2	2
4308	TraesCS2A01G076800	TraesCS2D01G075400	A	D	2	2
4317	TraesCS2A01G350400	TraesCS2B01G368900	A	B	2	2
4317	TraesCS2A01G350400	TraesCS2D01G348700	A	D	2	2
4317	TraesCS2A01G350500	TraesCS2B01G368900	A	B	2	2
4317	TraesCS2A01G350500	TraesCS2D01G348700	A	D	2	2
4317	TraesCS2A01G350600	TraesCS2B01G368900	A	B	2	2
4317	TraesCS2A01G350600	TraesCS2D01G348700	A	D	2	2
4321	TraesCS2A01G277200	TraesCS2B01G294400	A	B	2	2
4321	TraesCS2A01G277200	TraesCS2D01G275900	A	D	2	2
4322	TraesCS2A01G374500	TraesCS2B01G391500	A	B	2	2
4322	TraesCS2A01G374500	TraesCS2D01G370900	A	D	2	2
4326	TraesCS2A01G178400	TraesCS2B01G205400	A	B	2	2
4326	TraesCS2A01G178400	TraesCS2D01G187000	A	D	2	2
4363	TraesCS2A01G216600	TraesCS2B01G241900	A	B	2	2
4363	TraesCS2A01G216600	TraesCS2D01G222500	A	D	2	2
4371	TraesCS2A01G487300	TraesCS1D01G339300	A	D	2	1
4371	TraesCS2A01G487300	TraesCS2D01G487600	A	D	2	2
4378	TraesCS2A01G368700	TraesCS2B01G385900	A	B	2	2
4392	TraesCS2A01G210000	TraesCS2B01G236200	A	B	2	2
4392	TraesCS2A01G210000	TraesCS2D01G216800	A	D	2	2
4406	TraesCS2A01G253200	TraesCS2B01G272800	A	B	2	2
4406	TraesCS2A01G253200	TraesCS2D01G253800	A	D	2	2
4408	TraesCS2A01G021100	TraesCS2D01G051600	A	D	2	2
4425	TraesCS2A01G392700	TraesCS2D01G390800	A	D	2	2
4442	TraesCS2A01G551400	TraesCS2B01G582600	A	B	2	2
4442	TraesCS2A01G551400	TraesCS2D01G552500	A	D	2	2
4452	TraesCS2A01G427000	TraesCS2B01G447400	A	B	2	2
4452	TraesCS2A01G427000	TraesCS2D01G425100	A	D	2	2
4460	TraesCS2A01G260600	TraesCS2D01G263100	A	D	2	2
4468	TraesCS2A01G249800	TraesCS2B01G271100	A	B	2	2
4468	TraesCS2A01G249800	TraesCS2D01G251200	A	D	2	2
4478	TraesCS2A01G563500	TraesCS2B01G622700	A	B	2	2
4478	TraesCS2A01G563500	TraesCS2D01G571900	A	D	2	2
4500	TraesCS2A01G217600	TraesCS2B01G243100	A	B	2	2
4500	TraesCS2A01G217600	TraesCS2D01G223400	A	D	2	2
4504	TraesCS2A01G555200	TraesCS2B01G588700	A	B	2	2
4504	TraesCS2A01G555200	TraesCS2D01G559300	A	D	2	2
4505	TraesCS2A01G434900	TraesCS2B01G458000	A	B	2	2
4505	TraesCS2A01G434900	TraesCS2D01G434900	A	D	2	2
4512	TraesCS2A01G181200	TraesCS2B01G207800	A	B	2	2
4512	TraesCS2A01G181200	TraesCS2D01G189100	A	D	2	2
4515	TraesCS2A01G463200	TraesCS2B01G484900	A	B	2	2
4515	TraesCS2A01G463200	TraesCS2D01G463900	A	D	2	2
4516	TraesCS2A01G129200	TraesCS2B01G151500	A	B	2	2
4516	TraesCS2A01G129200	TraesCS2D01G131800	A	D	2	2
4517	TraesCS2A01G296900	TraesCS2B01G313100	A	B	2	2
4517	TraesCS2A01G296900	TraesCS2D01G294800	A	D	2	2
4520	TraesCS2A01G369100	TraesCS2B01G386300	A	B	2	2
4520	TraesCS2A01G369100	TraesCS2B01G386500	A	B	2	2
4520	TraesCS2A01G369100	TraesCS2D01G365900	A	D	2	2
4523	TraesCS2A01G010000	TraesCS2B01G012400	A	B	2	2
4523	TraesCS2A01G010000	TraesCS2D01G010600	A	D	2	2
4534	TraesCS2A01G105400	TraesCS2B01G122300	A	B	2	2
4534	TraesCS2A01G105400	TraesCS2D01G105000	A	D	2	2
4568	TraesCS2A01G312000	TraesCS2B01G328800	A	B	2	2
4568	TraesCS2A01G312000	TraesCS2D01G310300	A	D	2	2
4570	TraesCS2A01G076400	TraesCS2D01G075100	A	D	2	2
4571	TraesCS2A01G076200	TraesCS2B01G090900	A	B	2	2
4571	TraesCS2A01G076200	TraesCS2D01G074900	A	D	2	2
4576	TraesCS2A01G173400	TraesCS2B01G199700	A	B	2	2
4576	TraesCS2A01G173400	TraesCS2D01G180600	A	D	2	2
4591	TraesCS2A01G583900	TraesCS2B01G602700	A	B	2	2
4591	TraesCS2A01G583900	TraesCS2D01G595900	A	D	2	2
4596	TraesCS2A01G518100	TraesCS2B01G546700	A	B	2	2
4596	TraesCS2A01G518100	TraesCS2D01G519700	A	D	2	2
4600	TraesCS2A01G521500	TraesCS2B01G550800	A	B	2	2
4600	TraesCS2A01G521500	TraesCS2D01G523300	A	D	2	2
4608	TraesCS2A01G532700	TraesCS2B01G562200	A	B	2	2
4608	TraesCS2A01G532700	TraesCS2D01G534500	A	D	2	2
4610	TraesCS2A01G325200	TraesCS2B01G356700	A	B	2	2
4610	TraesCS2A01G325200	TraesCS2D01G337500	A	D	2	2
4614	TraesCS2A01G055700	TraesCS2D01G054500	A	D	2	2
4628	TraesCS2A01G518000	TraesCS2B01G546600	A	B	2	2
4628	TraesCS2A01G518000	TraesCS2D01G519600	A	D	2	2
4631	TraesCS2A01G307000	TraesCS2B01G323600	A	B	2	2
4631	TraesCS2A01G307000	TraesCS2D01G305400	A	D	2	2
4632	TraesCS2A01G324700	TraesCS2B01G357600	A	B	2	2
4632	TraesCS2A01G324700	TraesCS2D01G338200	A	D	2	2
4663	TraesCS2A01G008600	TraesCS3D01G030900	A	D	2	3
4681	TraesCS2A01G395200	TraesCS2B01G413300	A	B	2	2
4681	TraesCS2A01G395200	TraesCS2D01G393000	A	D	2	2
4683	TraesCS2A01G218500	TraesCS2B01G243900	A	B	2	2
4683	TraesCS2A01G218500	TraesCS2D01G224900	A	D	2	2
4686	TraesCS2A01G497500	TraesCS2B01G525700	A	B	2	2
4686	TraesCS2A01G497500	TraesCS2D01G497500	A	D	2	2
4707	TraesCS2A01G023200	TraesCS2B01G033300	A	B	2	2
4707	TraesCS2A01G023200	TraesCS2D01G024300	A	D	2	2
4719	TraesCS2A01G179600	TraesCS2B01G206800	A	B	2	2
4719	TraesCS2A01G179600	TraesCS2D01G188200	A	D	2	2
4723	TraesCS2A01G217000	TraesCS2B01G242400	A	B	2	2
4725	TraesCS2A01G252200	TraesCS2B01G272000	A	B	2	2
4725	TraesCS2A01G252200	TraesCS2D01G252900	A	D	2	2
4732	TraesCS2A01G330300	TraesCS2B01G351900	A	B	2	2
4732	TraesCS2A01G330300	TraesCS2D01G332400	A	D	2	2
4734	TraesCS2A01G058600	TraesCS2B01G070800	A	B	2	2
4734	TraesCS2A01G058600	TraesCS2D01G057800	A	D	2	2
4784	TraesCS2A01G472500	TraesCS2B01G495200	A	B	2	2
4784	TraesCS2A01G472500	TraesCS2D01G472100	A	D	2	2
4794	TraesCS2A01G572500	TraesCS2B01G615100	A	B	2	2
4794	TraesCS2A01G572500	TraesCS2D01G583700	A	D	2	2
4805	TraesCS2A01G164400	TraesCS2B01G190300	A	B	2	2
4805	TraesCS2A01G164400	TraesCS2D01G171400	A	D	2	2
4805	TraesCS2A01G164500	TraesCS2B01G190300	A	B	2	2
4805	TraesCS2A01G164500	TraesCS2D01G171400	A	D	2	2
4859	TraesCS2A01G568600	TraesCS2B01G627400	A	B	2	2
4866	TraesCS2A01G506800	TraesCS2B01G535100	A	B	2	2
4866	TraesCS2A01G506800	TraesCS2D01G507500	A	D	2	2
4881	TraesCS2A01G148000	TraesCS6B01G134500	A	B	2	6
4890	TraesCS2A01G140600	TraesCS2B01G164500	A	B	2	2
4890	TraesCS2A01G140600	TraesCS2B01G164800	A	B	2	2
4890	TraesCS2A01G140600	TraesCS2B01G165000	A	B	2	2
4890	TraesCS2A01G140600	TraesCS2B01G165500	A	B	2	2
4890	TraesCS2A01G140600	TraesCS2D01G143800	A	D	2	2
4890	TraesCS2A01G140700	TraesCS2B01G164500	A	B	2	2
4890	TraesCS2A01G140700	TraesCS2B01G164800	A	B	2	2
4890	TraesCS2A01G140700	TraesCS2B01G165000	A	B	2	2
4890	TraesCS2A01G140700	TraesCS2B01G165500	A	B	2	2
4890	TraesCS2A01G140700	TraesCS2D01G143800	A	D	2	2
4898	TraesCS2A01G191300	TraesCS2B01G215400	A	B	2	2
4898	TraesCS2A01G191300	TraesCS2D01G196400	A	D	2	2
4906	TraesCS2A01G428000	TraesCS2B01G448400	A	B	2	2
4906	TraesCS2A01G428000	TraesCS2D01G426000	A	D	2	2
4927	TraesCS2A01G521100	TraesCS2B01G550400	A	B	2	2
4928	TraesCS2A01G525400	TraesCS2B01G555300	A	B	2	2
4928	TraesCS2A01G525400	TraesCS2D01G528300	A	D	2	2
4935	TraesCS2A01G053500	TraesCS2B01G067400	A	B	2	2
4935	TraesCS2A01G053500	TraesCS6D01G140200	A	D	2	6
4972	TraesCS2A01G182700	TraesCS2B01G209200	A	B	2	2
4972	TraesCS2A01G182700	TraesCS2D01G190500	A	D	2	2
5007	TraesCS2A01G491200	TraesCS2B01G519400	A	B	2	2
5007	TraesCS2A01G491200	TraesCS2D01G491500	A	D	2	2
5013	TraesCS2A01G000800	TraesCS2B01G023300	A	B	2	2
5013	TraesCS2A01G000800	TraesCS2D01G000700	A	D	2	2
5023	TraesCS2A01G303100	TraesCS2B01G319700	A	B	2	2
5023	TraesCS2A01G303100	TraesCS2D01G301700	A	D	2	2
5048	TraesCS2A01G036500	TraesCS2B01G049600	A	B	2	2
5048	TraesCS2A01G036500	TraesCS2D01G035600	A	D	2	2
5058	TraesCS2A01G276900	TraesCS2B01G294700	A	B	2	2
5058	TraesCS2A01G276900	TraesCS2D01G276200	A	D	2	2
5074	TraesCS2A01G593100	TraesCS2B01G591200	A	B	2	2
5074	TraesCS2A01G593100	TraesCS2D01G561600	A	D	2	2
5075	TraesCS2A01G303800	TraesCS2B01G320400	A	B	2	2
5075	TraesCS2A01G303800	TraesCS2D01G302300	A	D	2	2
5079	TraesCS2A01G300700	TraesCS2B01G316900	A	B	2	2
5079	TraesCS2A01G300700	TraesCS2D01G299400	A	D	2	2
5084	TraesCS2A01G131600	TraesCS2B01G154000	A	B	2	2
5084	TraesCS2A01G131600	TraesCS2D01G133700	A	D	2	2
5087	TraesCS2A01G118200	TraesCS2B01G138300	A	B	2	2
5087	TraesCS2A01G118200	TraesCS2D01G116800	A	D	2	2
5088	TraesCS2A01G179700	TraesCS2B01G206900	A	B	2	2
5088	TraesCS2A01G179700	TraesCS2D01G188300	A	D	2	2
5105	TraesCS2A01G519400	TraesCS2B01G547400	A	B	2	2
5105	TraesCS2A01G519400	TraesCS2D01G520700	A	D	2	2
5121	TraesCS2A01G005900	TraesCS2D01G005700	A	D	2	2
5128	TraesCS2A01G334300	TraesCS2B01G347500	A	B	2	2
5128	TraesCS2A01G334300	TraesCS2D01G328500	A	D	2	2
5133	TraesCS2A01G382000	TraesCS2B01G399300	A	B	2	2
5133	TraesCS2A01G382000	TraesCS2D01G378500	A	D	2	2
5137	TraesCS2A01G497800	TraesCS2B01G526000	A	B	2	2
5137	TraesCS2A01G497800	TraesCS2D01G497900	A	D	2	2
5142	TraesCS2A01G058000	TraesCS2B01G073000	A	B	2	2
5142	TraesCS2A01G058000	TraesCS2D01G056700	A	D	2	2
5147	TraesCS2A01G059300	TraesCS2D01G059000	A	D	2	2
5150	TraesCS2A01G207800	TraesCS2B01G234400	A	B	2	2
5150	TraesCS2A01G207800	TraesCS2D01G214600	A	D	2	2
5151	TraesCS2A01G304000	TraesCS2B01G320700	A	B	2	2
5151	TraesCS2A01G304000	TraesCS2D01G302600	A	D	2	2
5155	TraesCS2A01G450500	TraesCS2B01G472100	A	B	2	2
5155	TraesCS2A01G450500	TraesCS2D01G450100	A	D	2	2
5156	TraesCS2A01G128200	TraesCS2B01G150300	A	B	2	2
5156	TraesCS2A01G128200	TraesCS2D01G130700	A	D	2	2
5159	TraesCS2A01G392600	TraesCS2B01G410800	A	B	2	2
5159	TraesCS2A01G392600	TraesCS2D01G390700	A	D	2	2
5171	TraesCS2A01G456000	TraesCS2B01G478000	A	B	2	2
5171	TraesCS2A01G456000	TraesCS2D01G456300	A	D	2	2
5172	TraesCS2A01G325100	TraesCS2B01G357200	A	B	2	2
5172	TraesCS2A01G325100	TraesCS2D01G337800	A	D	2	2
5173	TraesCS2A01G593300	TraesCS2B01G591000	A	B	2	2
5173	TraesCS2A01G593300	TraesCS2D01G561400	A	D	2	2
5174	TraesCS2A01G555500	TraesCS2B01G588300	A	B	2	2
5174	TraesCS2A01G555500	TraesCS2D01G559000	A	D	2	2
5176	TraesCS2A01G373700	TraesCS2B01G390800	A	B	2	2
5176	TraesCS2A01G373700	TraesCS2D01G369900	A	D	2	2
5200	TraesCS2A01G499100	TraesCS2B01G527300	A	B	2	2
5200	TraesCS2A01G499100	TraesCS2D01G499300	A	D	2	2
5201	TraesCS2A01G514900	TraesCS2B01G543200	A	B	2	2
5201	TraesCS2A01G514900	TraesCS2D01G516400	A	D	2	2
5243	TraesCS2A01G205900	TraesCS2B01G233100	A	B	2	2
5243	TraesCS2A01G205900	TraesCS2D01G210300	A	D	2	2
5256	TraesCS2A01G097700	TraesCS2D01G097100	A	D	2	2
5259	TraesCS2A01G395100	TraesCS2B01G413200	A	B	2	2
5259	TraesCS2A01G395100	TraesCS2D01G392500	A	D	2	2
5270	TraesCS2A01G269200	TraesCS2D01G268200	A	D	2	2
5288	TraesCS2A01G014100	TraesCS1B01G117100	A	B	2	1
5297	TraesCS2A01G294900	TraesCS2B01G311400	A	B	2	2
5297	TraesCS2A01G294900	TraesCS2D01G292700	A	D	2	2
5301	TraesCS2A01G392200	TraesCS2B01G410500	A	B	2	2
5301	TraesCS2A01G392200	TraesCS2D01G390300	A	D	2	2
5306	TraesCS2A01G259900	TraesCS2B01G282000	A	B	2	2
5306	TraesCS2A01G259900	TraesCS2D01G263600	A	D	2	2
5314	TraesCS2A01G197200	TraesCS2B01G224700	A	B	2	2
5314	TraesCS2A01G197200	TraesCS2D01G205100	A	D	2	2
5315	TraesCS2A01G106000	TraesCS2B01G123000	A	B	2	2
5315	TraesCS2A01G106000	TraesCS2D01G105600	A	D	2	2
5316	TraesCS2A01G339300	TraesCS2B01G342700	A	B	2	2
5316	TraesCS2A01G339300	TraesCS2D01G323800	A	D	2	2
5319	TraesCS2A01G354700	TraesCS2B01G374400	A	B	2	2
5319	TraesCS2A01G354700	TraesCS2D01G354200	A	D	2	2
5320	TraesCS2A01G501400	TraesCS2B01G529500	A	B	2	2
5320	TraesCS2A01G501400	TraesCS2D01G501900	A	D	2	2
5322	TraesCS2A01G449400	TraesCS2B01G470700	A	B	2	2
5322	TraesCS2A01G449400	TraesCS2D01G448800	A	D	2	2
5327	TraesCS2A01G337700	TraesCS2B01G344300	A	B	2	2
5327	TraesCS2A01G337700	TraesCS2D01G325300	A	D	2	2
5333	TraesCS2A01G358200	TraesCS2B01G377700	A	B	2	2
5333	TraesCS2A01G358200	TraesCS2D01G357100	A	D	2	2
5351	TraesCS2A01G192800	TraesCS2B01G213700	A	B	2	2
5351	TraesCS2A01G192800	TraesCS2D01G194600	A	D	2	2
5353	TraesCS2A01G131500	TraesCS2B01G153900	A	B	2	2
5353	TraesCS2A01G131500	TraesCS2D01G133600	A	D	2	2
5356	TraesCS2A01G282700	TraesCS2B01G300000	A	B	2	2
5356	TraesCS2A01G282700	TraesCS2D01G281400	A	D	2	2
5362	TraesCS2A01G474300	TraesCS2B01G497800	A	B	2	2
5362	TraesCS2A01G474300	TraesCS2D01G474000	A	D	2	2
5363	TraesCS2A01G396100	TraesCS2B01G414400	A	B	2	2
5363	TraesCS2A01G396100	TraesCS2D01G393800	A	D	2	2
5369	TraesCS2A01G329300	TraesCS2B01G353000	A	B	2	2
5369	TraesCS2A01G329300	TraesCS2D01G333400	A	D	2	2
5382	TraesCS2A01G193900	TraesCS2B01G212900	A	B	2	2
5382	TraesCS2A01G193900	TraesCS2D01G193900	A	D	2	2
5387	TraesCS2A01G486100	TraesCS2B01G512700	A	B	2	2
5391	TraesCS2A01G526900	TraesCS2B01G557300	A	B	2	2
5391	TraesCS2A01G526900	TraesCS2D01G529600	A	D	2	2
5399	TraesCS2A01G163200	TraesCS2B01G189000	A	B	2	2
5399	TraesCS2A01G163200	TraesCS2D01G170100	A	D	2	2
5401	TraesCS2A01G558000	TraesCS2B01G622400	A	B	2	2
5401	TraesCS2A01G558000	TraesCS2D01G571600	A	D	2	2
5432	TraesCS2A01G449200	TraesCS2B01G470500	A	B	2	2
5432	TraesCS2A01G449200	TraesCS2D01G448600	A	D	2	2
5437	TraesCS2A01G172800	TraesCS1D01G443500	A	D	2	1
5437	TraesCS2A01G172800	TraesCS2B01G000800	A	B	2	2
5437	TraesCS2A01G172800	TraesCS3D01G354600	A	D	2	3
5437	TraesCS2A01G172800	TraesCS3D01G401900	A	D	2	3
5460	TraesCS2A01G200500	TraesCS2B01G227800	A	B	2	2
5460	TraesCS2A01G200500	TraesCS2D01G208300	A	D	2	2
5495	TraesCS2A01G336100	TraesCS2B01G345800	A	B	2	2
5495	TraesCS2A01G336100	TraesCS2D01G326800	A	D	2	2
5510	TraesCS2A01G292300	TraesCS2B01G308700	A	B	2	2
5510	TraesCS2A01G292300	TraesCS2D01G290200	A	D	2	2
5520	TraesCS2A01G382200	TraesCS2B01G399600	A	B	2	2
5520	TraesCS2A01G382200	TraesCS2D01G378700	A	D	2	2
5527	TraesCS2A01G215500	TraesCS2B01G240500	A	B	2	2
5527	TraesCS2A01G215500	TraesCS2D01G221100	A	D	2	2
5529	TraesCS2A01G499000	TraesCS2B01G527100	A	B	2	2
5529	TraesCS2A01G499000	TraesCS2D01G499200	A	D	2	2
5556	TraesCS2A01G079900	TraesCS2B01G094700	A	B	2	2
5556	TraesCS2A01G079900	TraesCS2D01G077200	A	D	2	2
5556	TraesCS2A01G091600	TraesCS2B01G094700	A	B	2	2
5556	TraesCS2A01G091600	TraesCS2D01G077200	A	D	2	2
5569	TraesCS2A01G121300	TraesCS2B01G142300	A	B	2	2
5569	TraesCS2A01G121300	TraesCS2D01G123400	A	D	2	2
5613	TraesCS2A01G464300	TraesCS2B01G486000	A	B	2	2
5613	TraesCS2A01G464300	TraesCS2D01G465200	A	D	2	2
5639	TraesCS2A01G019900	TraesCS2B01G029200	A	B	2	2
5639	TraesCS2A01G019900	TraesCS2D01G021600	A	D	2	2
5641	TraesCS2A01G195300	TraesCS2B01G211300	A	B	2	2
5642	TraesCS2A01G195000	TraesCS2B01G211800	A	B	2	2
5650	TraesCS2A01G387300	TraesCS2B01G405000	A	B	2	2
5650	TraesCS2A01G387300	TraesCS2B01G405100	A	B	2	2
5650	TraesCS2A01G387300	TraesCS2D01G384800	A	D	2	2
5650	TraesCS2A01G387300	TraesCS2D01G384900	A	D	2	2
5662	TraesCS2A01G156700	TraesCS2B01G182200	A	B	2	2
5662	TraesCS2A01G156700	TraesCS2D01G162500	A	D	2	2
5685	TraesCS2A01G094000	TraesCS2B01G108800	A	B	2	2
5685	TraesCS2A01G094000	TraesCS2D01G092600	A	D	2	2
5690	TraesCS2A01G345900	TraesCS2B01G364300	A	B	2	2
5690	TraesCS2A01G345900	TraesCS2D01G344600	A	D	2	2
5697	TraesCS2A01G079700	TraesCS2B01G094500	A	B	2	2
5697	TraesCS2A01G079700	TraesCS2D01G077000	A	D	2	2
5698	TraesCS2A01G218000	TraesCS2B01G243400	A	B	2	2
5698	TraesCS2A01G218000	TraesCS2D01G223900	A	D	2	2
5699	TraesCS2A01G300500	TraesCS2B01G316700	A	B	2	2
5727	TraesCS2A01G549900	TraesCS2B01G580500	A	B	2	2
5727	TraesCS2A01G549900	TraesCS2D01G550800	A	D	2	2
5727	TraesCS2A01G549900	TraesCS2D01G551000	A	D	2	2
5730	TraesCS2A01G533100	TraesCS2B01G562600	A	B	2	2
5730	TraesCS2A01G533100	TraesCS2D01G535000	A	D	2	2
5739	TraesCS2A01G472100	TraesCS2B01G494800	A	B	2	2
5745	TraesCS2A01G173800	TraesCS2B01G200300	A	B	2	2
5745	TraesCS2A01G173800	TraesCS2D01G181100	A	D	2	2
5751	TraesCS2A01G228200	TraesCS2D01G239000	A	D	2	2
5799	TraesCS2A01G040300	TraesCS2D01G038900	A	D	2	2
5801	TraesCS2A01G389500	TraesCS2B01G407700	A	B	2	2
5801	TraesCS2A01G389500	TraesCS2D01G387400	A	D	2	2
5805	TraesCS2A01G025400	TraesCS2B01G038300	A	B	2	2
5805	TraesCS2A01G025400	TraesCS2D01G027400	A	D	2	2
5809	TraesCS2A01G544100	TraesCS2B01G574300	A	B	2	2
5809	TraesCS2A01G544100	TraesCS2D01G545100	A	D	2	2
5815	TraesCS2A01G288900	TraesCS2B01G305600	A	B	2	2
5815	TraesCS2A01G288900	TraesCS2D01G287000	A	D	2	2
5826	TraesCS2A01G159000	TraesCS2B01G184600	A	B	2	2
5826	TraesCS2A01G159000	TraesCS2D01G166100	A	D	2	2
5831	TraesCS2A01G363100	TraesCS2B01G381000	A	B	2	2
5831	TraesCS2A01G363100	TraesCS2D01G360400	A	D	2	2
5844	TraesCS2A01G199500	TraesCS2B01G226800	A	B	2	2
5844	TraesCS2A01G199500	TraesCS2D01G207100	A	D	2	2
5846	TraesCS2A01G252900	TraesCS2B01G272600	A	B	2	2
5846	TraesCS2A01G252900	TraesCS2D01G253500	A	D	2	2
5848	TraesCS2A01G152100	TraesCS2B01G177200	A	B	2	2
5848	TraesCS2A01G152100	TraesCS2D01G157200	A	D	2	2
5849	TraesCS2A01G316800	TraesCS2B01G334900	A	B	2	2
5849	TraesCS2A01G316800	TraesCS2D01G314700	A	D	2	2
5850	TraesCS2A01G209700	TraesCS2B01G235900	A	B	2	2
5850	TraesCS2A01G209700	TraesCS2D01G216500	A	D	2	2
5855	TraesCS2A01G129500	TraesCS2B01G151700	A	B	2	2
5871	TraesCS2A01G258800	TraesCS2B01G284500	A	B	2	2
5871	TraesCS2A01G258800	TraesCS2D01G264700	A	D	2	2
5877	TraesCS2A01G256100	TraesCS2B01G286400	A	B	2	2
5877	TraesCS2A01G256100	TraesCS2D01G266600	A	D	2	2
5885	TraesCS2A01G196500	TraesCS2B01G224100	A	B	2	2
5885	TraesCS2A01G196500	TraesCS2D01G204500	A	D	2	2
5887	TraesCS2A01G318300	TraesCS2B01G336400	A	B	2	2
5887	TraesCS2A01G318300	TraesCS2D01G315900	A	D	2	2
5913	TraesCS2A01G276700	TraesCS2D01G276400	A	D	2	2
5915	TraesCS2A01G468900	TraesCS2B01G491800	A	B	2	2
5915	TraesCS2A01G468900	TraesCS2D01G469000	A	D	2	2
5919	TraesCS2A01G506100	TraesCS2B01G534500	A	B	2	2
5919	TraesCS2A01G506100	TraesCS2D01G506900	A	D	2	2
5921	TraesCS2A01G001200	TraesCS2B01G022700	A	B	2	2
5921	TraesCS2A01G001200	TraesCS2D01G001400	A	D	2	2
5926	TraesCS2A01G481100	TraesCS2B01G507200	A	B	2	2
5926	TraesCS2A01G481100	TraesCS2D01G481400	A	D	2	2
5931	TraesCS2A01G160400	TraesCS2B01G186700	A	B	2	2
5931	TraesCS2A01G160400	TraesCS2D01G167800	A	D	2	2
5933	TraesCS2A01G260000	TraesCS2B01G281900	A	B	2	2
5933	TraesCS2A01G260000	TraesCS2D01G263500	A	D	2	2
5939	TraesCS2A01G338500	TraesCS2B01G343400	A	B	2	2
5939	TraesCS2A01G338500	TraesCS2D01G324500	A	D	2	2
5940	TraesCS2A01G324000	TraesCS2B01G358100	A	B	2	2
5940	TraesCS2A01G324000	TraesCS2D01G338900	A	D	2	2
5945	TraesCS2A01G156800	TraesCS2B01G182300	A	B	2	2
5945	TraesCS2A01G156800	TraesCS2D01G162600	A	D	2	2
5956	TraesCS2A01G378800	TraesCS2B01G395800	A	B	2	2
5956	TraesCS2A01G378800	TraesCS2D01G374800	A	D	2	2
5963	TraesCS2A01G550300	TraesCS2B01G580900	A	B	2	2
5963	TraesCS2A01G550300	TraesCS2D01G551300	A	D	2	2
5966	TraesCS2A01G295300	TraesCS2B01G311800	A	B	2	2
5966	TraesCS2A01G295300	TraesCS2D01G293100	A	D	2	2
5971	TraesCS2A01G554900	TraesCS2B01G589100	A	B	2	2
5971	TraesCS2A01G554900	TraesCS2D01G559700	A	D	2	2
5978	TraesCS2A01G400000	TraesCS2B01G418100	A	B	2	2
5978	TraesCS2A01G400000	TraesCS2D01G397600	A	D	2	2
5980	TraesCS2A01G518900	TraesCS2B01G547200	A	B	2	2
5980	TraesCS2A01G518900	TraesCS2D01G520300	A	D	2	2
5983	TraesCS2A01G379700	TraesCS2B01G396600	A	B	2	2
5983	TraesCS2A01G379700	TraesCS2D01G375900	A	D	2	2
5985	TraesCS2A01G256500	TraesCS2D01G266400	A	D	2	2
5987	TraesCS2A01G296700	TraesCS2B01G312900	A	B	2	2
5987	TraesCS2A01G296700	TraesCS2D01G294600	A	D	2	2
5988	TraesCS2A01G382900	TraesCS2B01G400100	A	B	2	2
5988	TraesCS2A01G382900	TraesCS2D01G379200	A	D	2	2
5994	TraesCS2A01G310100	TraesCS2B01G327100	A	B	2	2
5994	TraesCS2A01G310100	TraesCS2D01G308300	A	D	2	2
5995	TraesCS2A01G351800	TraesCS2B01G370000	A	B	2	2
5995	TraesCS2A01G351800	TraesCS2D01G350000	A	D	2	2
6006	TraesCS2A01G250300	TraesCS2B01G266500	A	B	2	2
6006	TraesCS2A01G250300	TraesCS2D01G251500	A	D	2	2
6007	TraesCS2A01G193400	TraesCS2B01G213300	A	B	2	2
6007	TraesCS2A01G193400	TraesCS2D01G194100	A	D	2	2
6018	TraesCS2A01G492500	TraesCS2B01G520700	A	B	2	2
6018	TraesCS2A01G492500	TraesCS2D01G492800	A	D	2	2
6019	TraesCS2A01G353600	TraesCS2B01G371500	A	B	2	2
6019	TraesCS2A01G353600	TraesCS2D01G350500	A	D	2	2
6027	TraesCS2A01G413300	TraesCS2B01G432000	A	B	2	2
6027	TraesCS2A01G413300	TraesCS2D01G411300	A	D	2	2
6033	TraesCS2A01G523700	TraesCS2B01G553600	A	B	2	2
6033	TraesCS2A01G523700	TraesCS2D01G525900	A	D	2	2
6034	TraesCS2A01G517000	TraesCS2B01G545500	A	B	2	2
6034	TraesCS2A01G517000	TraesCS2D01G518600	A	D	2	2
6063	TraesCS2A01G384800	TraesCS2B01G401800	A	B	2	2
6063	TraesCS2A01G384800	TraesCS2D01G381500	A	D	2	2
6068	TraesCS2A01G115900	TraesCS2B01G135300	A	B	2	2
6068	TraesCS2A01G115900	TraesCS2D01G119300	A	D	2	2
6070	TraesCS2A01G260100	TraesCS2B01G281800	A	B	2	2
6070	TraesCS2A01G260100	TraesCS2D01G263400	A	D	2	2
6076	TraesCS2A01G106700	TraesCS2B01G124300	A	B	2	2
6076	TraesCS2A01G106700	TraesCS2D01G107300	A	D	2	2
6112	TraesCS2A01G313100	TraesCS2B01G330200	A	B	2	2
6112	TraesCS2A01G313100	TraesCS2D01G311600	A	D	2	2
6116	TraesCS2A01G367000	TraesCS2B01G384500	A	B	2	2
6116	TraesCS2A01G367000	TraesCS2D01G363900	A	D	2	2
6117	TraesCS2A01G289100	TraesCS2B01G305700	A	B	2	2
6117	TraesCS2A01G289100	TraesCS2D01G287100	A	D	2	2
6118	TraesCS2A01G280800	TraesCS2B01G298200	A	B	2	2
6118	TraesCS2A01G280800	TraesCS2D01G279600	A	D	2	2
6121	TraesCS2A01G166000	TraesCS2B01G192000	A	B	2	2
6121	TraesCS2A01G166000	TraesCS2D01G173300	A	D	2	2
6122	TraesCS2A01G194300	TraesCS2B01G212600	A	B	2	2
6122	TraesCS2A01G194300	TraesCS2D01G193600	A	D	2	2
6125	TraesCS2A01G355900	TraesCS2B01G372200	A	B	2	2
6125	TraesCS2A01G355900	TraesCS2D01G352200	A	D	2	2
6132	TraesCS2A01G169000	TraesCS2B01G195300	A	B	2	2
6132	TraesCS2A01G169000	TraesCS2D01G176600	A	D	2	2
6134	TraesCS2A01G353400	TraesCS2B01G371300	A	B	2	2
6134	TraesCS2A01G353400	TraesCS2D01G350700	A	D	2	2
6137	TraesCS2A01G079400	TraesCS2B01G094200	A	B	2	2
6137	TraesCS2A01G079400	TraesCS2D01G076800	A	D	2	2
6142	TraesCS2A01G545300	TraesCS2B01G575800	A	B	2	2
6162	TraesCS2A01G414400	TraesCS2B01G433500	A	B	2	2
6162	TraesCS2A01G414400	TraesCS2D01G411700	A	D	2	2
6164	TraesCS2A01G002400	TraesCS2B01G020300	A	B	2	2
6175	TraesCS2A01G334200	TraesCS2B01G347400	A	B	2	2
6175	TraesCS2A01G334200	TraesCS2D01G328400	A	D	2	2
6189	TraesCS2A01G448400	TraesCS2B01G469100	A	B	2	2
6189	TraesCS2A01G448400	TraesCS2D01G447500	A	D	2	2
6204	TraesCS2A01G403600	TraesCS2B01G421600	A	B	2	2
6204	TraesCS2A01G403600	TraesCS2D01G400700	A	D	2	2
6208	TraesCS2A01G334500	TraesCS2B01G347700	A	B	2	2
6208	TraesCS2A01G334500	TraesCS2D01G328700	A	D	2	2
6215	TraesCS2A01G236200	TraesCS2B01G259600	A	B	2	2
6215	TraesCS2A01G236200	TraesCS2D01G240900	A	D	2	2
6228	TraesCS2A01G384700	TraesCS2B01G401700	A	B	2	2
6228	TraesCS2A01G384700	TraesCS2D01G381400	A	D	2	2
6230	TraesCS2A01G415500	TraesCS2B01G434500	A	B	2	2
6236	TraesCS2A01G159500	TraesCS2B01G185100	A	B	2	2
6247	TraesCS2A01G200700	TraesCS2B01G228000	A	B	2	2
6247	TraesCS2A01G200700	TraesCS2D01G208500	A	D	2	2
6249	TraesCS2A01G541500	TraesCS2B01G571800	A	B	2	2
6249	TraesCS2A01G541500	TraesCS2D01G542700	A	D	2	2
6250	TraesCS2A01G492900	TraesCS2B01G521000	A	B	2	2
6250	TraesCS2A01G492900	TraesCS2D01G493100	A	D	2	2
6253	TraesCS2A01G080000	TraesCS2B01G094800	A	B	2	2
6253	TraesCS2A01G080000	TraesCS2D01G077300	A	D	2	2
6254	TraesCS2A01G323700	TraesCS2B01G257700	A	B	2	2
6254	TraesCS2A01G323700	TraesCS2D01G339300	A	D	2	2
6255	TraesCS2A01G033000	TraesCS2D01G032500	A	D	2	2
6262	TraesCS2A01G062300	TraesCS2B01G129800	A	B	2	2
6262	TraesCS2A01G062300	TraesCS2D01G111500	A	D	2	2
6262	TraesCS2A01G110800	TraesCS2B01G129800	A	B	2	2
6262	TraesCS2A01G110800	TraesCS2D01G111500	A	D	2	2
6293	TraesCS2A01G502800	TraesCS2B01G530900	A	B	2	2
6298	TraesCS2A01G439200	TraesCS2D01G443900	A	D	2	2
6299	TraesCS2A01G437900	TraesCS2D01G436400	A	D	2	2
6304	TraesCS2A01G011900	TraesCS3D01G094600	A	D	2	3
6304	TraesCS2A01G011900	TraesCS4B01G294400	A	B	2	4
6304	TraesCS2A01G011900	TraesCS4D01G293300	A	D	2	4
6312	TraesCS2A01G299900	TraesCS2B01G608400	A	B	2	2
6312	TraesCS2A01G299900	TraesCS2D01G591100	A	D	2	2
6313	TraesCS2A01G553000	TraesCS2B01G585000	A	B	2	2
6313	TraesCS2A01G553000	TraesCS2D01G553700	A	D	2	2
6313	TraesCS2A01G553000	TraesCS2D01G554000	A	D	2	2
6313	TraesCS2A01G553000	TraesCS2D01G554700	A	D	2	2
6315	TraesCS2A01G205600	TraesCS7D01G181700	A	D	2	7
6323	TraesCS2A01G358500	TraesCS2B01G378000	A	B	2	2
6323	TraesCS2A01G358500	TraesCS2D01G357500	A	D	2	2
6323	TraesCS2A01G358700	TraesCS2B01G378000	A	B	2	2
6323	TraesCS2A01G358700	TraesCS2D01G357500	A	D	2	2
6339	TraesCS2A01G284600	TraesCS5D01G300200	A	D	2	5
6347	TraesCS2A01G536100	TraesCS2B01G566800	A	B	2	2
6347	TraesCS2A01G536100	TraesCS2D01G537400	A	D	2	2
6347	TraesCS2A01G536100	TraesCS2D01G537600	A	D	2	2
6349	TraesCS2A01G287400	TraesCS6D01G065000	A	D	2	6
6354	TraesCS2A01G115800	TraesCS2B01G135400	A	B	2	2
6354	TraesCS2A01G115800	TraesCS2D01G119400	A	D	2	2
6366	TraesCS2A01G017200	TraesCS3D01G458600	A	D	2	3
6367	TraesCS2A01G017500	TraesCS2D01G018700	A	D	2	2
6378	TraesCS2A01G551500	TraesCS2D01G552600	A	D	2	2
6381	TraesCS2A01G080900	TraesCS2D01G079000	A	D	2	2
6389	TraesCS2A01G169400	TraesCS2B01G195700	A	B	2	2
6389	TraesCS2A01G169400	TraesCS2D01G176900	A	D	2	2
6396	TraesCS2A01G098800	TraesCS2B01G115100	A	B	2	2
6396	TraesCS2A01G098800	TraesCS2D01G089200	A	D	2	2
6397	TraesCS2A01G098900	TraesCS2B01G408100	A	B	2	2
6406	TraesCS2A01G210700	TraesCS2B01G236600	A	B	2	2
6406	TraesCS2A01G210700	TraesCS2D01G217200	A	D	2	2
6407	TraesCS2A01G272600	TraesCS2B01G290800	A	B	2	2
6407	TraesCS2A01G272600	TraesCS2D01G271900	A	D	2	2
6419	TraesCS2A01G305800	TraesCS2B01G322500	A	B	2	2
6419	TraesCS2A01G305800	TraesCS2D01G304200	A	D	2	2
6424	TraesCS2A01G340300	TraesCS2B01G338100	A	B	2	2
6456	TraesCS2A01G408900	TraesCS2B01G427200	A	B	2	2
6456	TraesCS2A01G408900	TraesCS2D01G406000	A	D	2	2
6465	TraesCS2A01G222400	TraesCS2B01G247800	A	B	2	2
6465	TraesCS2A01G222400	TraesCS2D01G228300	A	D	2	2
6486	TraesCS2A01G089900	TraesCS2B01G105600	A	B	2	2
6486	TraesCS2A01G089900	TraesCS2D01G087800	A	D	2	2
6493	TraesCS2A01G429400	TraesCS2B01G449900	A	B	2	2
6493	TraesCS2A01G429400	TraesCS2D01G427100	A	D	2	2
6496	TraesCS2A01G217300	TraesCS2B01G242600	A	B	2	2
6496	TraesCS2A01G217300	TraesCS2D01G223100	A	D	2	2
6500	TraesCS2A01G208300	TraesCS2B01G234800	A	B	2	2
6500	TraesCS2A01G208300	TraesCS2D01G215000	A	D	2	2
6504	TraesCS2A01G307300	TraesCS2B01G323800	A	B	2	2
6504	TraesCS2A01G307300	TraesCS2D01G305600	A	D	2	2
6505	TraesCS2A01G304700	TraesCS2B01G321400	A	B	2	2
6505	TraesCS2A01G304700	TraesCS2D01G303300	A	D	2	2
6508	TraesCS2A01G102200	TraesCS2B01G119300	A	B	2	2
6508	TraesCS2A01G102200	TraesCS2D01G101700	A	D	2	2
6509	TraesCS2A01G395400	TraesCS2B01G413500	A	B	2	2
6509	TraesCS2A01G395400	TraesCS2D01G393200	A	D	2	2
6516	TraesCS2A01G194200	TraesCS2B01G212700	A	B	2	2
6516	TraesCS2A01G194200	TraesCS2D01G193700	A	D	2	2
6529	TraesCS2A01G224200	TraesCS2B01G274400	A	B	2	2
6529	TraesCS2A01G224200	TraesCS2D01G230500	A	D	2	2
6563	TraesCS2A01G452100	TraesCS2B01G473600	A	B	2	2
6563	TraesCS2A01G452100	TraesCS2D01G451900	A	D	2	2
6564	TraesCS2A01G462400	TraesCS2B01G484000	A	B	2	2
6564	TraesCS2A01G462400	TraesCS2D01G462800	A	D	2	2
6570	TraesCS2A01G213300	TraesCS2B01G238100	A	B	2	2
6570	TraesCS2A01G213300	TraesCS2D01G219200	A	D	2	2
6580	TraesCS2A01G356600	TraesCS2B01G375900	A	B	2	2
6580	TraesCS2A01G356600	TraesCS2D01G355500	A	D	2	2
6587	TraesCS2A01G149100	TraesCS2B01G174000	A	B	2	2
6587	TraesCS2A01G149100	TraesCS2D01G153900	A	D	2	2
6589	TraesCS2A01G169700	TraesCS2B01G196000	A	B	2	2
6589	TraesCS2A01G169700	TraesCS2D01G177200	A	D	2	2
6608	TraesCS2A01G532300	TraesCS2B01G561600	A	B	2	2
6608	TraesCS2A01G532300	TraesCS2B01G561700	A	B	2	2
6625	TraesCS2A01G514700	TraesCS2B01G543000	A	B	2	2
6636	TraesCS2A01G069800	TraesCS2B01G083000	A	B	2	2
6636	TraesCS2A01G069800	TraesCS2D01G068600	A	D	2	2
6644	TraesCS2A01G340900	TraesCS2B01G338700	A	B	2	2
6644	TraesCS2A01G340900	TraesCS2D01G318500	A	D	2	2
6647	TraesCS2A01G141400	TraesCS2B01G166400	A	B	2	2
6647	TraesCS2A01G141400	TraesCS2D01G144900	A	D	2	2
6652	TraesCS2A01G324900	TraesCS2B01G357400	A	B	2	2
6652	TraesCS2A01G324900	TraesCS2D01G338000	A	D	2	2
6655	TraesCS2A01G035200	TraesCS2B01G048300	A	B	2	2
6664	TraesCS2A01G276000	TraesCS2B01G293700	A	B	2	2
6664	TraesCS2A01G276000	TraesCS2D01G275000	A	D	2	2
6676	TraesCS2A01G189200	TraesCS2B01G218100	A	B	2	2
6676	TraesCS2A01G189200	TraesCS2D01G198500	A	D	2	2
6677	TraesCS2A01G229500	TraesCS2B01G251200	A	B	2	2
6677	TraesCS2A01G229500	TraesCS2D01G233400	A	D	2	2
6680	TraesCS2A01G390000	TraesCS2B01G409200	A	B	2	2
6680	TraesCS2A01G390000	TraesCS2D01G388700	A	D	2	2
6694	TraesCS2A01G465300	TraesCS3B01G115600	A	B	2	3
6694	TraesCS2A01G465300	TraesCS3B01G604700	A	B	2	3
6731	TraesCS2A01G464200	TraesCS2B01G485900	A	B	2	2
6731	TraesCS2A01G464200	TraesCS2D01G465100	A	D	2	2
6735	TraesCS2A01G399400	TraesCS2B01G417400	A	B	2	2
6735	TraesCS2A01G399400	TraesCS2D01G396900	A	D	2	2
6736	TraesCS2A01G331300	TraesCS2B01G350900	A	B	2	2
6736	TraesCS2A01G331300	TraesCS2D01G331600	A	D	2	2
6738	TraesCS2A01G183400	TraesCS2B01G210000	A	B	2	2
6738	TraesCS2A01G183400	TraesCS2D01G191200	A	D	2	2
6739	TraesCS2A01G306200	TraesCS2B01G322900	A	B	2	2
6739	TraesCS2A01G306200	TraesCS2D01G304600	A	D	2	2
6740	TraesCS2A01G149500	TraesCS2B01G174600	A	B	2	2
6740	TraesCS2A01G149500	TraesCS2D01G154600	A	D	2	2
6741	TraesCS2A01G374200	TraesCS2D01G370500	A	D	2	2
6742	TraesCS2A01G396300	TraesCS2B01G414600	A	B	2	2
6742	TraesCS2A01G396300	TraesCS2D01G394000	A	D	2	2
6753	TraesCS2A01G575500	TraesCS2B01G611700	A	B	2	2
6753	TraesCS2A01G575500	TraesCS2D01G586200	A	D	2	2
6758	TraesCS2A01G283200	TraesCS2D01G281900	A	D	2	2
6763	TraesCS2A01G344100	TraesCS2B01G341600	A	B	2	2
6763	TraesCS2A01G344100	TraesCS2D01G322400	A	D	2	2
6767	TraesCS2A01G562000	TraesCS5D01G473700	A	D	2	5
6769	TraesCS2A01G285500	TraesCS2B01G302600	A	B	2	2
6769	TraesCS2A01G285500	TraesCS2D01G284500	A	D	2	2
6772	TraesCS2A01G186300	TraesCS2B01G220800	A	B	2	2
6772	TraesCS2A01G186300	TraesCS2D01G201600	A	D	2	2
6773	TraesCS2A01G394500	TraesCS2B01G412500	A	B	2	2
6773	TraesCS2A01G394500	TraesCS2D01G392200	A	D	2	2
6774	TraesCS2A01G322900	TraesCS2B01G359700	A	B	2	2
6774	TraesCS2A01G322900	TraesCS2D01G340000	A	D	2	2
6775	TraesCS2A01G576600	TraesCS2B01G610800	A	B	2	2
6775	TraesCS2A01G576600	TraesCS2D01G587300	A	D	2	2
6782	TraesCS2A01G154000	TraesCS2B01G179300	A	B	2	2
6782	TraesCS2A01G154000	TraesCS2D01G159500	A	D	2	2
6784	TraesCS2A01G354800	TraesCS2B01G374300	A	B	2	2
6784	TraesCS2A01G354800	TraesCS2D01G354100	A	D	2	2
6795	TraesCS2A01G183100	TraesCS2B01G209700	A	B	2	2
6795	TraesCS2A01G183100	TraesCS2D01G190900	A	D	2	2
6797	TraesCS2A01G518500	TraesCS2B01G546900	A	B	2	2
6797	TraesCS2A01G518500	TraesCS2D01G519900	A	D	2	2
6804	TraesCS2A01G312900	TraesCS2D01G311400	A	D	2	2
6805	TraesCS2A01G189100	TraesCS2B01G218200	A	B	2	2
6805	TraesCS2A01G189100	TraesCS2D01G198600	A	D	2	2
6806	TraesCS2A01G391200	TraesCS2B01G407800	A	B	2	2
6806	TraesCS2A01G391200	TraesCS2D01G387500	A	D	2	2
6807	TraesCS2A01G454800	TraesCS2B01G476700	A	B	2	2
6807	TraesCS2A01G454800	TraesCS2D01G455000	A	D	2	2
6808	TraesCS2A01G336400	TraesCS2B01G345500	A	B	2	2
6808	TraesCS2A01G336400	TraesCS2D01G326500	A	D	2	2
6810	TraesCS2A01G433800	TraesCS2B01G454800	A	B	2	2
6810	TraesCS2A01G433800	TraesCS2D01G431800	A	D	2	2
6818	TraesCS2A01G451100	TraesCS2B01G472600	A	B	2	2
6818	TraesCS2A01G451100	TraesCS2D01G450800	A	D	2	2
6821	TraesCS2A01G479100	TraesCS2B01G503500	A	B	2	2
6821	TraesCS2A01G479100	TraesCS2D01G478400	A	D	2	2
6822	TraesCS2A01G174600	TraesCS2B01G201000	A	B	2	2
6822	TraesCS2A01G174600	TraesCS2D01G182000	A	D	2	2
6823	TraesCS2A01G474900	TraesCS2B01G498500	A	B	2	2
6823	TraesCS2A01G474900	TraesCS2D01G474900	A	D	2	2
6828	TraesCS2A01G294600	TraesCS2B01G311000	A	B	2	2
6828	TraesCS2A01G294600	TraesCS2D01G292300	A	D	2	2
6830	TraesCS2A01G514000	TraesCS2B01G542600	A	B	2	2
6830	TraesCS2A01G514000	TraesCS2D01G515600	A	D	2	2
6837	TraesCS2A01G256400	TraesCS2B01G286100	A	B	2	2
6842	TraesCS2A01G175900	TraesCS2B01G202000	A	B	2	2
6842	TraesCS2A01G175900	TraesCS2D01G183300	A	D	2	2
6843	TraesCS2A01G301300	TraesCS2B01G317400	A	B	2	2
6843	TraesCS2A01G301300	TraesCS2D01G299900	A	D	2	2
6857	TraesCS2A01G067400	TraesCS2B01G079600	A	B	2	2
6857	TraesCS2A01G067400	TraesCS2D01G065700	A	D	2	2
6858	TraesCS2A01G330000	TraesCS2B01G352300	A	B	2	2
6858	TraesCS2A01G330000	TraesCS2D01G332700	A	D	2	2
6863	TraesCS2A01G204600	TraesCS2B01G232100	A	B	2	2
6863	TraesCS2A01G204600	TraesCS2D01G211300	A	D	2	2
6867	TraesCS2A01G268100	TraesCS2D01G256100	A	D	2	2
6869	TraesCS2A01G212400	TraesCS2B01G237600	A	B	2	2
6869	TraesCS2A01G212400	TraesCS2D01G218300	A	D	2	2
6871	TraesCS2A01G393900	TraesCS2B01G411900	A	B	2	2
6871	TraesCS2A01G393900	TraesCS2D01G391800	A	D	2	2
6877	TraesCS2A01G319800	TraesCS2B01G347000	A	B	2	2
6877	TraesCS2A01G319800	TraesCS2D01G327900	A	D	2	2
6877	TraesCS2A01G333700	TraesCS2B01G347000	A	B	2	2
6877	TraesCS2A01G333700	TraesCS2D01G327900	A	D	2	2
6879	TraesCS2A01G306700	TraesCS2B01G323400	A	B	2	2
6879	TraesCS2A01G306700	TraesCS2D01G305200	A	D	2	2
6883	TraesCS2A01G555400	TraesCS2B01G588400	A	B	2	2
6883	TraesCS2A01G555400	TraesCS2D01G559100	A	D	2	2
6884	TraesCS2A01G302100	TraesCS2B01G317900	A	B	2	2
6884	TraesCS2A01G302100	TraesCS2D01G300800	A	D	2	2
6886	TraesCS2A01G392800	TraesCS2B01G410900	A	B	2	2
6886	TraesCS2A01G392800	TraesCS2D01G390900	A	D	2	2
6887	TraesCS2A01G134400	TraesCS2B01G157900	A	B	2	2
6887	TraesCS2A01G134400	TraesCS2D01G136600	A	D	2	2
6888	TraesCS2A01G347200	TraesCS2D01G345800	A	D	2	2
6892	TraesCS2A01G529000	TraesCS2B01G559500	A	B	2	2
6896	TraesCS2A01G100500	TraesCS2B01G117700	A	B	2	2
6896	TraesCS2A01G100500	TraesCS2D01G100000	A	D	2	2
6898	TraesCS2A01G325700	TraesCS2B01G356200	A	B	2	2
6898	TraesCS2A01G325700	TraesCS2D01G337000	A	D	2	2
6904	TraesCS2A01G110400	TraesCS2B01G129200	A	B	2	2
6904	TraesCS2A01G110400	TraesCS2D01G110900	A	D	2	2
6912	TraesCS2A01G212200	TraesCS2B01G237300	A	B	2	2
6912	TraesCS2A01G212200	TraesCS2D01G218100	A	D	2	2
6914	TraesCS2A01G463000	TraesCS2B01G484700	A	B	2	2
6914	TraesCS2A01G463000	TraesCS2D01G463600	A	D	2	2
6921	TraesCS2A01G162200	TraesCS2B01G188100	A	B	2	2
6923	TraesCS2A01G261700	TraesCS2B01G280500	A	B	2	2
6923	TraesCS2A01G261700	TraesCS2D01G262300	A	D	2	2
6931	TraesCS2A01G097300	TraesCS2B01G112700	A	B	2	2
6931	TraesCS2A01G097300	TraesCS2D01G095900	A	D	2	2
6956	TraesCS2A01G357100	TraesCS2B01G376300	A	B	2	2
6956	TraesCS2A01G357100	TraesCS2D01G355900	A	D	2	2
6969	TraesCS2A01G304900	TraesCS2B01G321700	A	B	2	2
6969	TraesCS2A01G304900	TraesCS2D01G303500	A	D	2	2
6978	TraesCS2A01G172600	TraesCS2B01G198900	A	B	2	2
6978	TraesCS2A01G172600	TraesCS2D01G179700	A	D	2	2
6979	TraesCS2A01G201600	TraesCS2B01G228700	A	B	2	2
6979	TraesCS2A01G201600	TraesCS2D01G213900	A	D	2	2
6980	TraesCS2A01G307700	TraesCS2B01G324300	A	B	2	2
6980	TraesCS2A01G307700	TraesCS2D01G306100	A	D	2	2
6982	TraesCS2A01G116800	TraesCS2B01G136000	A	B	2	2
6982	TraesCS2A01G116800	TraesCS2D01G118300	A	D	2	2
6987	TraesCS2A01G576500	TraesCS2B01G610900	A	B	2	2
6987	TraesCS2A01G576500	TraesCS2D01G587200	A	D	2	2
6990	TraesCS2A01G204200	TraesCS2B01G231600	A	B	2	2
6990	TraesCS2A01G204200	TraesCS2D01G211700	A	D	2	2
6993	TraesCS2A01G436700	TraesCS2B01G456500	A	B	2	2
6993	TraesCS2A01G436700	TraesCS2D01G433200	A	D	2	2
7008	TraesCS2A01G443100	TraesCS2B01G464200	A	B	2	2
7008	TraesCS2A01G443100	TraesCS2D01G442200	A	D	2	2
7011	TraesCS2A01G213900	TraesCS2B01G238900	A	B	2	2
7011	TraesCS2A01G213900	TraesCS2D01G219700	A	D	2	2
7025	TraesCS2A01G109100	TraesCS2B01G126800	A	B	2	2
7025	TraesCS2A01G109100	TraesCS2D01G109200	A	D	2	2
7028	TraesCS2A01G351900	TraesCS2B01G370100	A	B	2	2
7028	TraesCS2A01G351900	TraesCS2D01G350100	A	D	2	2
7035	TraesCS2A01G501700	TraesCS2B01G529900	A	B	2	2
7035	TraesCS2A01G501700	TraesCS2D01G502200	A	D	2	2
7038	TraesCS2A01G336200	TraesCS2B01G345700	A	B	2	2
7038	TraesCS2A01G336200	TraesCS2D01G326700	A	D	2	2
7039	TraesCS2A01G390600	TraesCS2B01G408800	A	B	2	2
7039	TraesCS2A01G390600	TraesCS2D01G388100	A	D	2	2
7040	TraesCS2A01G429800	TraesCS2B01G450700	A	B	2	2
7040	TraesCS2A01G429800	TraesCS2D01G427400	A	D	2	2
7044	TraesCS2A01G171700	TraesCS2D01G179200	A	D	2	2
7049	TraesCS2A01G154500	TraesCS2B01G179700	A	B	2	2
7049	TraesCS2A01G154500	TraesCS2D01G160000	A	D	2	2
7050	TraesCS2A01G391600	TraesCS2B01G410100	A	B	2	2
7051	TraesCS2A01G516900	TraesCS2D01G518400	A	D	2	2
7054	TraesCS2A01G549200	TraesCS2B01G579800	A	B	2	2
7054	TraesCS2A01G549200	TraesCS2D01G550000	A	D	2	2
7056	TraesCS2A01G223300	TraesCS2B01G273600	A	B	2	2
7056	TraesCS2A01G223300	TraesCS2D01G229300	A	D	2	2
7060	TraesCS2A01G304400	TraesCS2B01G321100	A	B	2	2
7069	TraesCS2A01G239700	TraesCS7D01G301300	A	D	2	7
7082	TraesCS2A01G211900	TraesCS2B01G237000	A	B	2	2
7082	TraesCS2A01G211900	TraesCS2D01G217600	A	D	2	2
7089	TraesCS2A01G116500	TraesCS2B01G135700	A	B	2	2
7089	TraesCS2A01G116500	TraesCS2D01G118600	A	D	2	2
7098	TraesCS2A01G277800	TraesCS7B01G147300	A	B	2	7
7098	TraesCS2A01G277800	TraesCS7D01G117700	A	D	2	7
7101	TraesCS2A01G222700	TraesCS2B01G248200	A	B	2	2
7101	TraesCS2A01G222700	TraesCS2D01G228700	A	D	2	2
7107	TraesCS2A01G170400	TraesCS2B01G196700	A	B	2	2
7107	TraesCS2A01G170400	TraesCS2D01G178000	A	D	2	2
7113	TraesCS2A01G255700	TraesCS2B01G286700	A	B	2	2
7113	TraesCS2A01G255700	TraesCS2D01G267000	A	D	2	2
7116	TraesCS2A01G276300	TraesCS2B01G294000	A	B	2	2
7116	TraesCS2A01G276300	TraesCS2D01G275300	A	D	2	2
7123	TraesCS2A01G278800	TraesCS2B01G296300	A	B	2	2
7123	TraesCS2A01G278800	TraesCS2D01G277800	A	D	2	2
7129	TraesCS2A01G355300	TraesCS2B01G373000	A	B	2	2
7129	TraesCS2A01G355300	TraesCS2D01G353000	A	D	2	2
7141	TraesCS2A01G424400	TraesCS2B01G444000	A	B	2	2
7141	TraesCS2A01G424400	TraesCS2D01G422200	A	D	2	2
7158	TraesCS2A01G200800	TraesCS2B01G228100	A	B	2	2
7158	TraesCS2A01G200800	TraesCS2B01G228200	A	B	2	2
7158	TraesCS2A01G200800	TraesCS2D01G213300	A	D	2	2
7166	TraesCS2A01G348400	TraesCS2B01G366800	A	B	2	2
7166	TraesCS2A01G348400	TraesCS2D01G346800	A	D	2	2
7193	TraesCS2A01G398100	TraesCS2B01G416200	A	B	2	2
7193	TraesCS2A01G398100	TraesCS2D01G395800	A	D	2	2
7196	TraesCS2A01G222600	TraesCS2B01G248100	A	B	2	2
7196	TraesCS2A01G222600	TraesCS2D01G228600	A	D	2	2
7216	TraesCS2A01G585400	TraesCS3B01G531100	A	B	2	3
7230	TraesCS2A01G327800	TraesCS2B01G354200	A	B	2	2
7230	TraesCS2A01G327800	TraesCS2B01G358900	A	B	2	2
7230	TraesCS2A01G327800	TraesCS2D01G335100	A	D	2	2
7250	TraesCS2A01G023400	TraesCS2B01G033600	A	B	2	2
7250	TraesCS2A01G023400	TraesCS2D01G004500	A	D	2	2
7250	TraesCS2A01G023400	TraesCS2D01G024500	A	D	2	2
7262	TraesCS2A01G095800	TraesCS2B01G111200	A	B	2	2
7266	TraesCS2A01G360800	TraesCS3B01G573800	A	B	2	3
7266	TraesCS2A01G360800	TraesCS3D01G513300	A	D	2	3
7270	TraesCS2A01G385800	TraesCS2B01G402700	A	B	2	2
7286	TraesCS2A01G442000	TraesCS2B01G462600	A	B	2	2
7286	TraesCS2A01G442000	TraesCS2D01G440500	A	D	2	2
7287	TraesCS2A01G177200	TraesCS2D01G185400	A	D	2	2
7288	TraesCS2A01G177400	TraesCS2B01G204500	A	B	2	2
7289	TraesCS2A01G174100	TraesCS2B01G200700	A	B	2	2
7289	TraesCS2A01G174100	TraesCS2D01G181300	A	D	2	2
7302	TraesCS2A01G029700	TraesCS2B01G042600	A	B	2	2
7303	TraesCS2A01G031500	TraesCS2B01G043600	A	B	2	2
7316	TraesCS2A01G096200	TraesCS2B01G111600	A	B	2	2
7316	TraesCS2A01G096200	TraesCS2B01G111700	A	B	2	2
7316	TraesCS2A01G096200	TraesCS2D01G094500	A	D	2	2
7319	TraesCS2A01G293600	TraesCS2B01G309300	A	B	2	2
7319	TraesCS2A01G293600	TraesCS2D01G290600	A	D	2	2
7324	TraesCS2A01G449100	TraesCS2B01G470400	A	B	2	2
7324	TraesCS2A01G449100	TraesCS2D01G448500	A	D	2	2
7329	TraesCS2A01G030100	TraesCS2B01G044800	A	B	2	2
7330	TraesCS2A01G029300	TraesCS2B01G042300	A	B	2	2
7345	TraesCS2A01G145000	TraesCS2B01G169900	A	B	2	2
7345	TraesCS2A01G145000	TraesCS2D01G148800	A	D	2	2
7370	TraesCS2A01G580700	TraesCS2D01G592400	A	D	2	2
7384	TraesCS2A01G152600	TraesCS2B01G177700	A	B	2	2
7384	TraesCS2A01G152600	TraesCS2D01G158000	A	D	2	2
7396	TraesCS2A01G277000	TraesCS2B01G294600	A	B	2	2
7396	TraesCS2A01G277000	TraesCS2D01G276100	A	D	2	2
7418	TraesCS2A01G330400	TraesCS2B01G351800	A	B	2	2
7422	TraesCS2A01G270100	TraesCS2B01G288800	A	B	2	2
7422	TraesCS2A01G270100	TraesCS2D01G269100	A	D	2	2
7423	TraesCS2A01G123700	TraesCS2B01G145600	A	B	2	2
7423	TraesCS2A01G123700	TraesCS2D01G126500	A	D	2	2
7444	TraesCS2A01G061600	TraesCS2B01G075000	A	B	2	2
7444	TraesCS2A01G061600	TraesCS2D01G060800	A	D	2	2
7451	TraesCS2A01G593200	TraesCS2B01G591100	A	B	2	2
7451	TraesCS2A01G593200	TraesCS2D01G561500	A	D	2	2
7464	TraesCS2A01G242500	TraesCS3D01G329500	A	D	2	3
7464	TraesCS2A01G242500	TraesCS7B01G031700	A	B	2	7
7475	TraesCS2A01G496800	TraesCS2B01G525100	A	B	2	2
7475	TraesCS2A01G496800	TraesCS2D01G497000	A	D	2	2
7477	TraesCS2A01G256300	TraesCS2B01G286200	A	B	2	2
7478	TraesCS2A01G219600	TraesCS2B01G245100	A	B	2	2
7478	TraesCS2A01G219600	TraesCS2D01G225400	A	D	2	2
7488	TraesCS2A01G451400	TraesCS2B01G472900	A	B	2	2
7488	TraesCS2A01G451400	TraesCS2D01G451200	A	D	2	2
7490	TraesCS2A01G094800	TraesCS2B01G109900	A	B	2	2
7490	TraesCS2A01G094800	TraesCS2D01G093300	A	D	2	2
7491	TraesCS2A01G089100	TraesCS2B01G104800	A	B	2	2
7491	TraesCS2A01G089100	TraesCS2D01G087000	A	D	2	2
7528	TraesCS2A01G134500	TraesCS2B01G158000	A	B	2	2
7528	TraesCS2A01G134500	TraesCS2D01G136700	A	D	2	2
7547	TraesCS2A01G285400	TraesCS2B01G302500	A	B	2	2
7547	TraesCS2A01G285400	TraesCS2D01G284600	A	D	2	2
7549	TraesCS2A01G207000	TraesCS2B01G234100	A	B	2	2
7549	TraesCS2A01G207000	TraesCS2D01G209000	A	D	2	2
7550	TraesCS2A01G238700	TraesCS2B01G256600	A	B	2	2
7550	TraesCS2A01G238700	TraesCS2D01G246600	A	D	2	2
7557	TraesCS2A01G333000	TraesCS2B01G348800	A	B	2	2
7557	TraesCS2A01G333000	TraesCS2D01G329900	A	D	2	2
7561	TraesCS2A01G352400	TraesCS2B01G370400	A	B	2	2
7561	TraesCS2A01G352400	TraesCS2D01G350400	A	D	2	2
7563	TraesCS2A01G525500	TraesCS2B01G555400	A	B	2	2
7563	TraesCS2A01G525500	TraesCS2D01G528500	A	D	2	2
7565	TraesCS2A01G330500	TraesCS2B01G351600	A	B	2	2
7565	TraesCS2A01G330500	TraesCS2D01G332300	A	D	2	2
7566	TraesCS2A01G306800	TraesCS2B01G323500	A	B	2	2
7566	TraesCS2A01G306800	TraesCS2D01G305300	A	D	2	2
7570	TraesCS2A01G312800	TraesCS2B01G329800	A	B	2	2
7570	TraesCS2A01G312800	TraesCS2D01G311300	A	D	2	2
7571	TraesCS2A01G254800	TraesCS2B01G267300	A	B	2	2
7571	TraesCS2A01G254800	TraesCS2D01G255300	A	D	2	2
7572	TraesCS2A01G289200	TraesCS2B01G305800	A	B	2	2
7572	TraesCS2A01G289200	TraesCS2D01G287200	A	D	2	2
7573	TraesCS2A01G286600	TraesCS2B01G303500	A	B	2	2
7573	TraesCS2A01G286600	TraesCS2D01G285200	A	D	2	2
7574	TraesCS2A01G341600	TraesCS2B01G339500	A	B	2	2
7574	TraesCS2A01G341600	TraesCS2D01G319300	A	D	2	2
7574	TraesCS2A01G341600	TraesCS2D01G319500	A	D	2	2
7574	TraesCS2A01G341700	TraesCS2B01G339500	A	B	2	2
7574	TraesCS2A01G341700	TraesCS2D01G319300	A	D	2	2
7574	TraesCS2A01G341700	TraesCS2D01G319500	A	D	2	2
7575	TraesCS2A01G337800	TraesCS2B01G344200	A	B	2	2
7575	TraesCS2A01G337800	TraesCS2D01G325200	A	D	2	2
7579	TraesCS2A01G527500	TraesCS2B01G558200	A	B	2	2
7579	TraesCS2A01G527500	TraesCS2D01G530300	A	D	2	2
7581	TraesCS2A01G079300	TraesCS2B01G094100	A	B	2	2
7581	TraesCS2A01G079300	TraesCS2D01G076700	A	D	2	2
7582	TraesCS2A01G080700	TraesCS2B01G095500	A	B	2	2
7582	TraesCS2A01G080700	TraesCS2D01G078500	A	D	2	2
7589	TraesCS2A01G408800	TraesCS2B01G427100	A	B	2	2
7589	TraesCS2A01G408800	TraesCS2B01G427300	A	B	2	2
7589	TraesCS2A01G408800	TraesCS2D01G406100	A	D	2	2
7593	TraesCS2A01G166600	TraesCS2B01G192700	A	B	2	2
7593	TraesCS2A01G166600	TraesCS2D01G174200	A	D	2	2
7594	TraesCS2A01G348200	TraesCS2B01G366600	A	B	2	2
7594	TraesCS2A01G348200	TraesCS2D01G346600	A	D	2	2
7598	TraesCS2A01G245700	TraesCS2B01G269600	A	B	2	2
7598	TraesCS2A01G245700	TraesCS2D01G236200	A	D	2	2
7617	TraesCS2A01G500500	TraesCS2B01G528400	A	B	2	2
7617	TraesCS2A01G500500	TraesCS2D01G500700	A	D	2	2
7621	TraesCS2A01G286700	TraesCS2B01G303600	A	B	2	2
7621	TraesCS2A01G286700	TraesCS2D01G285300	A	D	2	2
7654	TraesCS2A01G175500	TraesCS2B01G201800	A	B	2	2
7654	TraesCS2A01G175500	TraesCS2D01G182800	A	D	2	2
7664	TraesCS2A01G038200	TraesCS2B01G051400	A	B	2	2
7664	TraesCS2A01G038200	TraesCS2D01G037200	A	D	2	2
7667	TraesCS2A01G389800	TraesCS2B01G409400	A	B	2	2
7667	TraesCS2A01G389800	TraesCS2D01G388900	A	D	2	2
7668	TraesCS2A01G272500	TraesCS2B01G290700	A	B	2	2
7668	TraesCS2A01G272500	TraesCS2D01G271800	A	D	2	2
7671	TraesCS2A01G445300	TraesCS2B01G466200	A	B	2	2
7671	TraesCS2A01G445300	TraesCS2B01G466300	A	B	2	2
7671	TraesCS2A01G445300	TraesCS2D01G444100	A	D	2	2
7716	TraesCS2A01G517100	TraesCS2B01G545600	A	B	2	2
7716	TraesCS2A01G517100	TraesCS2D01G518700	A	D	2	2
7726	TraesCS2A01G270800	TraesCS2B01G289600	A	B	2	2
7726	TraesCS2A01G270800	TraesCS2D01G269900	A	D	2	2
7738	TraesCS2A01G209500	TraesCS2B01G235700	A	B	2	2
7738	TraesCS2A01G209500	TraesCS2D01G216200	A	D	2	2
7756	TraesCS2A01G436600	TraesCS2B01G456600	A	B	2	2
7756	TraesCS2A01G436600	TraesCS2D01G433300	A	D	2	2
7760	TraesCS2A01G519500	TraesCS2B01G547500	A	B	2	2
7760	TraesCS2A01G519500	TraesCS2D01G520800	A	D	2	2
7764	TraesCS2A01G336700	TraesCS2B01G345200	A	B	2	2
7764	TraesCS2A01G336700	TraesCS2D01G326200	A	D	2	2
7765	TraesCS2A01G224100	TraesCS2B01G274300	A	B	2	2
7765	TraesCS2A01G224100	TraesCS2D01G230400	A	D	2	2
7772	TraesCS2A01G373800	TraesCS2B01G391000	A	B	2	2
7772	TraesCS2A01G373800	TraesCS2D01G370100	A	D	2	2
7778	TraesCS2A01G469300	TraesCS2B01G492200	A	B	2	2
7778	TraesCS2A01G469300	TraesCS2D01G469400	A	D	2	2
7788	TraesCS2A01G303300	TraesCS2B01G319800	A	B	2	2
7788	TraesCS2A01G303300	TraesCS2D01G301900	A	D	2	2
7792	TraesCS2A01G547900	TraesCS2B01G578700	A	B	2	2
7792	TraesCS2A01G547900	TraesCS2D01G549000	A	D	2	2
7795	TraesCS2A01G409300	TraesCS2B01G427800	A	B	2	2
7795	TraesCS2A01G409300	TraesCS2D01G406700	A	D	2	2
7797	TraesCS2A01G265700	TraesCS2B01G276300	A	B	2	2
7797	TraesCS2A01G265700	TraesCS2D01G258000	A	D	2	2
7803	TraesCS2A01G335600	TraesCS2B01G346300	A	B	2	2
7803	TraesCS2A01G335600	TraesCS2D01G327200	A	D	2	2
7809	TraesCS2A01G028300	TraesCS2B01G040700	A	B	2	2
7809	TraesCS2A01G028300	TraesCS2D01G030400	A	D	2	2
7815	TraesCS2A01G190800	TraesCS2B01G216300	A	B	2	2
7815	TraesCS2A01G190800	TraesCS2D01G197200	A	D	2	2
7832	TraesCS2A01G133200	TraesCS2B01G156700	A	B	2	2
7832	TraesCS2A01G133200	TraesCS2D01G135200	A	D	2	2
7840	TraesCS2A01G106200	TraesCS2B01G123200	A	B	2	2
7840	TraesCS2A01G106200	TraesCS2D01G106000	A	D	2	2
7854	TraesCS2A01G214400	TraesCS2B01G239400	A	B	2	2
7854	TraesCS2A01G214400	TraesCS2D01G220200	A	D	2	2
7859	TraesCS2A01G455300	TraesCS2B01G477400	A	B	2	2
7859	TraesCS2A01G455300	TraesCS2D01G455700	A	D	2	2
7862	TraesCS2A01G378700	TraesCS2B01G395700	A	B	2	2
7862	TraesCS2A01G378700	TraesCS2D01G374900	A	D	2	2
7868	TraesCS2A01G315900	TraesCS2B01G334100	A	B	2	2
7868	TraesCS2A01G315900	TraesCS2D01G313900	A	D	2	2
7879	TraesCS2A01G387900	TraesCS2B01G406000	A	B	2	2
7879	TraesCS2A01G387900	TraesCS2D01G385700	A	D	2	2
7881	TraesCS2A01G164700	TraesCS2B01G190500	A	B	2	2
7881	TraesCS2A01G164700	TraesCS2D01G171600	A	D	2	2
7884	TraesCS2A01G184800	TraesCS2B01G222600	A	B	2	2
7884	TraesCS2A01G184800	TraesCS2D01G202900	A	D	2	2
7888	TraesCS2A01G499700	TraesCS2D01G499800	A	D	2	2
7896	TraesCS2A01G301500	TraesCS2B01G317600	A	B	2	2
7896	TraesCS2A01G301500	TraesCS2D01G300100	A	D	2	2
7899	TraesCS2A01G540000	TraesCS2B01G570400	A	B	2	2
7899	TraesCS2A01G540000	TraesCS2D01G541600	A	D	2	2
7903	TraesCS2A01G426200	TraesCS2B01G446500	A	B	2	2
7903	TraesCS2A01G426200	TraesCS2D01G424300	A	D	2	2
7921	TraesCS2A01G575900	TraesCS2D01G586600	A	D	2	2
7927	TraesCS2A01G356000	TraesCS2B01G372100	A	B	2	2
7927	TraesCS2A01G356000	TraesCS2D01G352100	A	D	2	2
7929	TraesCS2A01G242900	TraesCS7B01G204000	A	B	2	7
7929	TraesCS2A01G242900	TraesCS7D01G299100	A	D	2	7
7930	TraesCS2A01G347300	TraesCS2B01G365700	A	B	2	2
7930	TraesCS2A01G347300	TraesCS2D01G345900	A	D	2	2
7932	TraesCS2A01G401800	TraesCS2B01G419900	A	B	2	2
7932	TraesCS2A01G401800	TraesCS2D01G399300	A	D	2	2
7933	TraesCS2A01G367100	TraesCS2D01G364000	A	D	2	2
7950	TraesCS2A01G064200	TraesCS2D01G062500	A	D	2	2
7951	TraesCS2A01G435900	TraesCS2B01G457300	A	B	2	2
7951	TraesCS2A01G435900	TraesCS2D01G434000	A	D	2	2
7953	TraesCS2A01G310900	TraesCS2B01G327800	A	B	2	2
7953	TraesCS2A01G310900	TraesCS2D01G309000	A	D	2	2
7961	TraesCS2A01G516100	TraesCS2B01G544700	A	B	2	2
7961	TraesCS2A01G516100	TraesCS2D01G517600	A	D	2	2
7966	TraesCS2A01G440700	TraesCS2B01G460300	A	B	2	2
7966	TraesCS2A01G440700	TraesCS2D01G438100	A	D	2	2
7967	TraesCS2A01G455900	TraesCS2B01G477900	A	B	2	2
7967	TraesCS2A01G455900	TraesCS2D01G456200	A	D	2	2
7972	TraesCS2A01G414200	TraesCS2B01G433300	A	B	2	2
7972	TraesCS2A01G414200	TraesCS2D01G411500	A	D	2	2
7984	TraesCS2A01G556100	TraesCS2B01G586400	A	B	2	2
7984	TraesCS2A01G556100	TraesCS2D01G557300	A	D	2	2
7989	TraesCS2A01G246100	TraesCS2B01G270400	A	B	2	2
7989	TraesCS2A01G246100	TraesCS2D01G248500	A	D	2	2
7990	TraesCS2A01G118700	TraesCS2B01G138600	A	B	2	2
7990	TraesCS2A01G118700	TraesCS2D01G116500	A	D	2	2
8013	TraesCS2A01G322300	TraesCS2B01G360500	A	B	2	2
8013	TraesCS2A01G322300	TraesCS2D01G340800	A	D	2	2
8039	TraesCS2A01G324500	TraesCS2B01G357700	A	B	2	2
8039	TraesCS2A01G324500	TraesCS2D01G338500	A	D	2	2
8045	TraesCS2A01G124500	TraesCS2B01G147000	A	B	2	2
8045	TraesCS2A01G124500	TraesCS2D01G127400	A	D	2	2
8052	TraesCS2A01G245500	TraesCS2B01G258200	A	B	2	2
8052	TraesCS2A01G245500	TraesCS2D01G244600	A	D	2	2
8085	TraesCS2A01G183700	TraesCS2B01G210400	A	B	2	2
8085	TraesCS2A01G183700	TraesCS2D01G191600	A	D	2	2
8110	TraesCS2A01G113000	TraesCS2D01G113500	A	D	2	2
8138	TraesCS2A01G167100	TraesCS2B01G193300	A	B	2	2
8147	TraesCS2A01G007000	TraesCS2B01G018500	A	B	2	2
8149	TraesCS2A01G118000	TraesCS2B01G138000	A	B	2	2
8149	TraesCS2A01G118000	TraesCS2D01G117000	A	D	2	2
8150	TraesCS2A01G118100	TraesCS2B01G138100	A	B	2	2
8150	TraesCS2A01G118100	TraesCS2D01G116900	A	D	2	2
8163	TraesCS2A01G464400	TraesCS2B01G487600	A	B	2	2
8163	TraesCS2A01G464400	TraesCS2B01G488600	A	B	2	2
8163	TraesCS2A01G466500	TraesCS2B01G487600	A	B	2	2
8163	TraesCS2A01G466500	TraesCS2B01G488600	A	B	2	2
8167	TraesCS2A01G007300	TraesCS2B01G013600	A	B	2	2
8167	TraesCS2A01G007300	TraesCS2D01G008200	A	D	2	2
8169	TraesCS2A01G042900	TraesCS2B01G055500	A	B	2	2
8169	TraesCS2A01G042900	TraesCS2B01G055600	A	B	2	2
8169	TraesCS2A01G042900	TraesCS2D01G042000	A	D	2	2
8170	TraesCS2A01G226800	TraesCS2D01G239700	A	D	2	2
8188	TraesCS2A01G324100	TraesCS2B01G358000	A	B	2	2
8188	TraesCS2A01G324100	TraesCS2D01G338800	A	D	2	2
8221	TraesCS2A01G278700	TraesCS2B01G296400	A	B	2	2
8221	TraesCS2A01G278700	TraesCS2D01G277900	A	D	2	2
8223	TraesCS2A01G197600	TraesCS2D01G205600	A	D	2	2
8236	TraesCS2A01G360000	TraesCS3B01G373100	A	B	2	3
8286	TraesCS2A01G441500	TraesCS2D01G439200	A	D	2	2
8302	TraesCS2A01G369200	TraesCS2B01G386400	A	B	2	2
8302	TraesCS2A01G369200	TraesCS2D01G365800	A	D	2	2
8333	TraesCS2A01G183500	TraesCS2D01G191400	A	D	2	2
8345	TraesCS2A01G171100	TraesCS2B01G197600	A	B	2	2
8345	TraesCS2A01G171100	TraesCS2D01G178900	A	D	2	2
8354	TraesCS2A01G278300	TraesCS2D01G277300	A	D	2	2
8361	TraesCS2A01G199400	TraesCS2B01G226700	A	B	2	2
8361	TraesCS2A01G199400	TraesCS2D01G207000	A	D	2	2
8362	TraesCS2A01G000900	TraesCS2B01G023200	A	B	2	2
8362	TraesCS2A01G000900	TraesCS2D01G000800	A	D	2	2
8364	TraesCS2A01G104600	TraesCS2B01G121600	A	B	2	2
8364	TraesCS2A01G104600	TraesCS2D01G104300	A	D	2	2
8365	TraesCS2A01G291300	TraesCS2B01G307700	A	B	2	2
8365	TraesCS2A01G291300	TraesCS2D01G289300	A	D	2	2
8366	TraesCS2A01G423400	TraesCS2B01G442800	A	B	2	2
8366	TraesCS2A01G423400	TraesCS2D01G421100	A	D	2	2
8369	TraesCS2A01G303700	TraesCS2B01G320300	A	B	2	2
8369	TraesCS2A01G303700	TraesCS2D01G302200	A	D	2	2
8380	TraesCS2A01G492600	TraesCS2B01G520800	A	B	2	2
8380	TraesCS2A01G492600	TraesCS2D01G492900	A	D	2	2
8385	TraesCS2A01G210100	TraesCS2B01G236300	A	B	2	2
8385	TraesCS2A01G210100	TraesCS2D01G216900	A	D	2	2
8388	TraesCS2A01G273300	TraesCS2B01G291300	A	B	2	2
8388	TraesCS2A01G273300	TraesCS2D01G272500	A	D	2	2
8391	TraesCS2A01G204300	TraesCS2B01G231800	A	B	2	2
8391	TraesCS2A01G204300	TraesCS2D01G211600	A	D	2	2
8394	TraesCS2A01G235700	TraesCS2B01G257600	A	B	2	2
8394	TraesCS2A01G235700	TraesCS2D01G238100	A	D	2	2
8398	TraesCS2A01G165100	TraesCS2B01G191300	A	B	2	2
8398	TraesCS2A01G165100	TraesCS2D01G172200	A	D	2	2
8399	TraesCS2A01G443000	TraesCS2D01G442100	A	D	2	2
8400	TraesCS2A01G116600	TraesCS2B01G135800	A	B	2	2
8400	TraesCS2A01G116600	TraesCS2D01G118500	A	D	2	2
8412	TraesCS2A01G034400	TraesCS2D01G033800	A	D	2	2
8414	TraesCS2A01G176600	TraesCS2B01G203000	A	B	2	2
8414	TraesCS2A01G176600	TraesCS2D01G184000	A	D	2	2
8421	TraesCS2A01G078900	TraesCS2B01G093500	A	B	2	2
8425	TraesCS2A01G366900	TraesCS2B01G384400	A	B	2	2
8425	TraesCS2A01G366900	TraesCS2D01G363800	A	D	2	2
8427	TraesCS2A01G319900	TraesCS2B01G346900	A	B	2	2
8427	TraesCS2A01G319900	TraesCS2D01G327800	A	D	2	2
8427	TraesCS2A01G333600	TraesCS2B01G346900	A	B	2	2
8427	TraesCS2A01G333600	TraesCS2D01G327800	A	D	2	2
8428	TraesCS2A01G503200	TraesCS2B01G531200	A	B	2	2
8428	TraesCS2A01G503200	TraesCS2D01G504000	A	D	2	2
8465	TraesCS2A01G350000	TraesCS2B01G368500	A	B	2	2
8465	TraesCS2A01G350000	TraesCS2D01G348400	A	D	2	2
8466	TraesCS2A01G240300	TraesCS2B01G258700	A	B	2	2
8466	TraesCS2A01G240300	TraesCS2D01G242300	A	D	2	2
8468	TraesCS2A01G115300	TraesCS2B01G135000	A	B	2	2
8468	TraesCS2A01G115300	TraesCS2D01G119600	A	D	2	2
8469	TraesCS2A01G115500	TraesCS2B01G135200	A	B	2	2
8469	TraesCS2A01G115700	TraesCS2B01G135200	A	B	2	2
8474	TraesCS2A01G187100	TraesCS2D01G200800	A	D	2	2
8483	TraesCS2A01G498600	TraesCS2B01G526700	A	B	2	2
8483	TraesCS2A01G498600	TraesCS2D01G498900	A	D	2	2
8488	TraesCS2A01G231000	TraesCS2B01G257100	A	B	2	2
8488	TraesCS2A01G231000	TraesCS2D01G235600	A	D	2	2
8493	TraesCS2A01G192500	TraesCS2B01G214300	A	B	2	2
8493	TraesCS2A01G192500	TraesCS2D01G195000	A	D	2	2
8505	TraesCS2A01G303400	TraesCS2B01G320000	A	B	2	2
8508	TraesCS2A01G328800	TraesCS2B01G353500	A	B	2	2
8508	TraesCS2A01G328800	TraesCS2D01G333900	A	D	2	2
8509	TraesCS2A01G387500	TraesCS2B01G405300	A	B	2	2
8517	TraesCS2A01G317800	TraesCS2B01G335800	A	B	2	2
8517	TraesCS2A01G317800	TraesCS2D01G315500	A	D	2	2
8523	TraesCS2A01G005400	TraesCS2B01G016200	A	B	2	2
8523	TraesCS2A01G005400	TraesCS2D01G006300	A	D	2	2
8524	TraesCS2A01G222200	TraesCS2B01G247600	A	B	2	2
8524	TraesCS2A01G222200	TraesCS2D01G228100	A	D	2	2
8525	TraesCS2A01G404100	TraesCS2B01G422000	A	B	2	2
8525	TraesCS2A01G404100	TraesCS2D01G401100	A	D	2	2
8542	TraesCS2A01G480300	TraesCS2B01G505100	A	B	2	2
8542	TraesCS2A01G480300	TraesCS2D01G479600	A	D	2	2
8545	TraesCS2A01G112700	TraesCS2B01G131500	A	B	2	2
8545	TraesCS2A01G112700	TraesCS2D01G113200	A	D	2	2
8574	TraesCS2A01G225400	TraesCS2B01G249000	A	B	2	2
8574	TraesCS2A01G225400	TraesCS2D01G231300	A	D	2	2
8586	TraesCS2A01G461800	TraesCS2B01G483400	A	B	2	2
8586	TraesCS2A01G461800	TraesCS2B01G483500	A	B	2	2
8586	TraesCS2A01G461800	TraesCS2D01G462000	A	D	2	2
8587	TraesCS2A01G396900	TraesCS2B01G415200	A	B	2	2
8587	TraesCS2A01G396900	TraesCS2D01G394700	A	D	2	2
8593	TraesCS2A01G414800	TraesCS2B01G434000	A	B	2	2
8593	TraesCS2A01G414800	TraesCS2D01G412100	A	D	2	2
8596	TraesCS2A01G464000	TraesCS2B01G485700	A	B	2	2
8596	TraesCS2A01G464000	TraesCS2D01G464900	A	D	2	2
8598	TraesCS2A01G404000	TraesCS2B01G421900	A	B	2	2
8598	TraesCS2A01G404000	TraesCS2D01G401000	A	D	2	2
8603	TraesCS2A01G567400	TraesCS2B01G629200	A	B	2	2
8603	TraesCS2A01G567400	TraesCS2D01G577900	A	D	2	2
8604	TraesCS2A01G473100	TraesCS2D01G472800	A	D	2	2
8605	TraesCS2A01G488100	TraesCS2B01G515700	A	B	2	2
8605	TraesCS2A01G488100	TraesCS2D01G488400	A	D	2	2
8610	TraesCS2A01G244200	TraesCS2B01G258500	A	B	2	2
8610	TraesCS2A01G244200	TraesCS2D01G246700	A	D	2	2
8611	TraesCS2A01G353800	TraesCS2B01G371900	A	B	2	2
8611	TraesCS2A01G353800	TraesCS2D01G351800	A	D	2	2
8612	TraesCS2A01G356500	TraesCS2B01G375800	A	B	2	2
8612	TraesCS2A01G356500	TraesCS2D01G355400	A	D	2	2
8617	TraesCS2A01G328000	TraesCS2B01G354000	A	B	2	2
8617	TraesCS2A01G328000	TraesCS2B01G359100	A	B	2	2
8617	TraesCS2A01G328000	TraesCS2D01G334900	A	D	2	2
8624	TraesCS2A01G593700	TraesCS2D01G561000	A	D	2	2
8625	TraesCS2A01G259400	TraesCS2B01G282500	A	B	2	2
8625	TraesCS2A01G259400	TraesCS2D01G264300	A	D	2	2
8631	TraesCS2A01G291800	TraesCS2B01G308300	A	B	2	2
8631	TraesCS2A01G291800	TraesCS2D01G289800	A	D	2	2
8632	TraesCS2A01G255600	TraesCS2B01G286900	A	B	2	2
8632	TraesCS2A01G255600	TraesCS2D01G267100	A	D	2	2
8633	TraesCS2A01G255000	TraesCS2B01G267200	A	B	2	2
8633	TraesCS2A01G255000	TraesCS2D01G255400	A	D	2	2
8634	TraesCS2A01G487800	TraesCS2B01G515400	A	B	2	2
8634	TraesCS2A01G487800	TraesCS2D01G488100	A	D	2	2
8637	TraesCS2A01G392400	TraesCS2B01G410600	A	B	2	2
8637	TraesCS2A01G392400	TraesCS2D01G390500	A	D	2	2
8642	TraesCS2A01G296500	TraesCS2B01G312700	A	B	2	2
8642	TraesCS2A01G296500	TraesCS2D01G294400	A	D	2	2
8648	TraesCS2A01G269800	TraesCS2B01G288400	A	B	2	2
8648	TraesCS2A01G269800	TraesCS2D01G268700	A	D	2	2
8650	TraesCS2A01G305300	TraesCS2B01G322100	A	B	2	2
8650	TraesCS2A01G305300	TraesCS2D01G303800	A	D	2	2
8665	TraesCS2A01G221900	TraesCS2B01G247400	A	B	2	2
8665	TraesCS2A01G221900	TraesCS2D01G227900	A	D	2	2
8685	TraesCS2A01G185000	TraesCS2B01G222100	A	B	2	2
8685	TraesCS2A01G185000	TraesCS2D01G202600	A	D	2	2
8695	TraesCS2A01G329200	TraesCS2B01G353100	A	B	2	2
8695	TraesCS2A01G329200	TraesCS2D01G333600	A	D	2	2
8698	TraesCS2A01G150300	TraesCS2B01G175500	A	B	2	2
8698	TraesCS2A01G150300	TraesCS2D01G155400	A	D	2	2
8702	TraesCS2A01G137800	TraesCS2D01G140800	A	D	2	2
8712	TraesCS2A01G261800	TraesCS2B01G280400	A	B	2	2
8712	TraesCS2A01G261800	TraesCS2D01G262200	A	D	2	2
8721	TraesCS2A01G493500	TraesCS2B01G613300	A	B	2	2
8722	TraesCS2A01G320200	TraesCS2B01G363000	A	B	2	2
8722	TraesCS2A01G320200	TraesCS2D01G343000	A	D	2	2
8724	TraesCS2A01G249600	TraesCS2B01G271300	A	B	2	2
8724	TraesCS2A01G249600	TraesCS2D01G251000	A	D	2	2
8725	TraesCS2A01G142300	TraesCS2B01G167500	A	B	2	2
8725	TraesCS2A01G142300	TraesCS2D01G145700	A	D	2	2
8728	TraesCS2A01G291400	TraesCS2B01G307900	A	B	2	2
8728	TraesCS2A01G291400	TraesCS2D01G289400	A	D	2	2
8730	TraesCS2A01G577500	TraesCS2B01G609900	A	B	2	2
8730	TraesCS2A01G577500	TraesCS2D01G588500	A	D	2	2
8730	TraesCS2A01G577500	TraesCS2D01G588900	A	D	2	2
8731	TraesCS2A01G316100	TraesCS2B01G334300	A	B	2	2
8731	TraesCS2A01G316100	TraesCS2D01G314100	A	D	2	2
8734	TraesCS2A01G451900	TraesCS2B01G473200	A	B	2	2
8734	TraesCS2A01G451900	TraesCS2D01G451700	A	D	2	2
8739	TraesCS2A01G314300	TraesCS2B01G333100	A	B	2	2
8739	TraesCS2A01G314300	TraesCS2D01G312500	A	D	2	2
8764	TraesCS2A01G487000	TraesCS2B01G514100	A	B	2	2
8764	TraesCS2A01G487000	TraesCS2D01G487300	A	D	2	2
8776	TraesCS2A01G582300	TraesCS2B01G604700	A	B	2	2
8776	TraesCS2A01G582300	TraesCS2D01G597900	A	D	2	2
8778	TraesCS2A01G282100	TraesCS2B01G299300	A	B	2	2
8778	TraesCS2A01G282100	TraesCS2D01G280900	A	D	2	2
8780	TraesCS2A01G179800	TraesCS2B01G207100	A	B	2	2
8780	TraesCS2A01G179800	TraesCS2D01G188500	A	D	2	2
8796	TraesCS2A01G281200	TraesCS2B01G298600	A	B	2	2
8796	TraesCS2A01G281200	TraesCS2D01G280100	A	D	2	2
8799	TraesCS2A01G255200	TraesCS2B01G267000	A	B	2	2
8799	TraesCS2A01G255200	TraesCS2D01G255600	A	D	2	2
8804	TraesCS2A01G289700	TraesCS2B01G306300	A	B	2	2
8804	TraesCS2A01G289700	TraesCS2D01G287700	A	D	2	2
8809	TraesCS2A01G141600	TraesCS2B01G166800	A	B	2	2
8809	TraesCS2A01G141600	TraesCS2D01G145100	A	D	2	2
8812	TraesCS2A01G476200	TraesCS2B01G499800	A	B	2	2
8812	TraesCS2A01G476200	TraesCS2D01G476100	A	D	2	2
8821	TraesCS2A01G314800	TraesCS2B01G333300	A	B	2	2
8821	TraesCS2A01G314800	TraesCS2D01G313000	A	D	2	2
8829	TraesCS2A01G154800	TraesCS2B01G179900	A	B	2	2
8829	TraesCS2A01G154800	TraesCS2D01G160100	A	D	2	2
8831	TraesCS2A01G223500	TraesCS2B01G273800	A	B	2	2
8831	TraesCS2A01G223500	TraesCS2D01G229500	A	D	2	2
8835	TraesCS2A01G347900	TraesCS2B01G366300	A	B	2	2
8835	TraesCS2A01G347900	TraesCS2D01G346200	A	D	2	2
8839	TraesCS2A01G198900	TraesCS2B01G226300	A	B	2	2
8839	TraesCS2A01G198900	TraesCS2D01G206700	A	D	2	2
8842	TraesCS2A01G256000	TraesCS2B01G286500	A	B	2	2
8842	TraesCS2A01G256000	TraesCS2D01G266700	A	D	2	2
8845	TraesCS2A01G539900	TraesCS2B01G570300	A	B	2	2
8845	TraesCS2A01G539900	TraesCS2D01G541500	A	D	2	2
8846	TraesCS2A01G577700	TraesCS2B01G609700	A	B	2	2
8846	TraesCS2A01G577700	TraesCS2D01G589100	A	D	2	2
8847	TraesCS2A01G559600	TraesCS2B01G620600	A	B	2	2
8847	TraesCS2A01G559600	TraesCS2D01G570900	A	D	2	2
8852	TraesCS2A01G007800	TraesCS2B01G012900	A	B	2	2
8852	TraesCS2A01G007800	TraesCS2D01G009600	A	D	2	2
8873	TraesCS2A01G065000	TraesCS2B01G077200	A	B	2	2
8873	TraesCS2A01G065000	TraesCS2D01G063100	A	D	2	2
8878	TraesCS2A01G069600	TraesCS2B01G082800	A	B	2	2
8878	TraesCS2A01G069600	TraesCS2D01G068400	A	D	2	2
8879	TraesCS2A01G445000	TraesCS2B01G466000	A	B	2	2
8886	TraesCS2A01G462900	TraesCS2B01G484600	A	B	2	2
8886	TraesCS2A01G462900	TraesCS2D01G463500	A	D	2	2
8900	TraesCS2A01G203400	TraesCS2B01G230700	A	B	2	2
8900	TraesCS2A01G203400	TraesCS2D01G212300	A	D	2	2
8908	TraesCS2A01G194800	TraesCS2B01G212000	A	B	2	2
8908	TraesCS2A01G194800	TraesCS2D01G193100	A	D	2	2
8921	TraesCS2A01G447900	TraesCS2B01G468300	A	B	2	2
8921	TraesCS2A01G447900	TraesCS2D01G446800	A	D	2	2
8923	TraesCS2A01G248600	TraesCS2B01G268600	A	B	2	2
8923	TraesCS2A01G248600	TraesCS2D01G250300	A	D	2	2
8953	TraesCS2A01G145700	TraesCS2B01G171100	A	B	2	2
8953	TraesCS2A01G145700	TraesCS2D01G150300	A	D	2	2
8960	TraesCS2A01G246000	TraesCS2B01G252900	A	B	2	2
8960	TraesCS2A01G246000	TraesCS2D01G245100	A	D	2	2
8963	TraesCS2A01G117000	TraesCS2B01G137100	A	B	2	2
8963	TraesCS2A01G117000	TraesCS2D01G118000	A	D	2	2
8983	TraesCS2A01G512000	TraesCS4B01G247800	A	B	2	4
8987	TraesCS2A01G348000	TraesCS2B01G366400	A	B	2	2
8987	TraesCS2A01G348000	TraesCS2D01G346300	A	D	2	2
9017	TraesCS2A01G231300	TraesCS2B01G256100	A	B	2	2
9017	TraesCS2A01G231300	TraesCS2D01G236900	A	D	2	2
9036	TraesCS2A01G146700	TraesCS2B01G172000	A	B	2	2
9036	TraesCS2A01G146700	TraesCS2D01G151300	A	D	2	2
9041	TraesCS2A01G430300	TraesCS2B01G450900	A	B	2	2
9041	TraesCS2A01G430300	TraesCS2D01G427900	A	D	2	2
9071	TraesCS2A01G559500	TraesCS2B01G620700	A	B	2	2
9071	TraesCS2A01G559500	TraesCS2D01G571000	A	D	2	2
9072	TraesCS2A01G558700	TraesCS2B01G621300	A	B	2	2
9073	TraesCS2A01G559100	TraesCS2B01G621100	A	B	2	2
9073	TraesCS2A01G559100	TraesCS2D01G299300	A	D	2	2
9096	TraesCS2A01G517800	TraesCS2D01G519400	A	D	2	2
9127	TraesCS2A01G453300	TraesCS2B01G340100	A	B	2	2
9127	TraesCS2A01G453300	TraesCS2D01G320600	A	D	2	2
9145	TraesCS2A01G329800	TraesCS2D01G332900	A	D	2	2
9154	TraesCS2A01G167300	TraesCS2B01G193500	A	B	2	2
9154	TraesCS2A01G167300	TraesCS2D01G174800	A	D	2	2
9159	TraesCS2A01G409700	TraesCS2B01G428100	A	B	2	2
9159	TraesCS2A01G409700	TraesCS2D01G407000	A	D	2	2
9160	TraesCS2A01G210400	TraesCS2B01G236500	A	B	2	2
9160	TraesCS2A01G210400	TraesCS2D01G217100	A	D	2	2
9165	TraesCS2A01G364800	TraesCS2B01G383400	A	B	2	2
9165	TraesCS2A01G364800	TraesCS2D01G362800	A	D	2	2
9172	TraesCS2A01G331000	TraesCS2B01G351300	A	B	2	2
9172	TraesCS2A01G331000	TraesCS2D01G332000	A	D	2	2
9178	TraesCS2A01G237700	TraesCS2B01G260600	A	B	2	2
9178	TraesCS2A01G237700	TraesCS2D01G244700	A	D	2	2
9182	TraesCS2A01G526400	TraesCS2B01G556700	A	B	2	2
9182	TraesCS2A01G526400	TraesCS2D01G529100	A	D	2	2
9188	TraesCS2A01G049400	TraesCS2B01G061600	A	B	2	2
9201	TraesCS2A01G568700	TraesCS2B01G552500	A	B	2	2
9201	TraesCS2A01G568700	TraesCS2D01G019800	A	D	2	2
9201	TraesCS2A01G568700	TraesCS3B01G001000	A	B	2	3
9203	TraesCS2A01G011200	TraesCS2D01G011900	A	D	2	2
9207	TraesCS2A01G050100	TraesCS2B01G063200	A	B	2	2
9208	TraesCS2A01G175600	TraesCS2D01G182900	A	D	2	2
9212	TraesCS2A01G139000	TraesCS5B01G545000	A	B	2	5
9225	TraesCS2A01G346600	TraesCS2B01G364900	A	B	2	2
9225	TraesCS2A01G346600	TraesCS2D01G345300	A	D	2	2
9254	TraesCS2A01G123300	TraesCS2B01G145400	A	B	2	2
9254	TraesCS2A01G123300	TraesCS2D01G126300	A	D	2	2
9257	TraesCS2A01G109400	TraesCS2B01G127100	A	B	2	2
9257	TraesCS2A01G109400	TraesCS2D01G109500	A	D	2	2
9264	TraesCS2A01G280400	TraesCS2B01G297700	A	B	2	2
9264	TraesCS2A01G280400	TraesCS2D01G279200	A	D	2	2
9265	TraesCS2A01G431900	TraesCS2B01G453400	A	B	2	2
9265	TraesCS2A01G431900	TraesCS2D01G429900	A	D	2	2
9266	TraesCS2A01G063800	TraesCS2B01G076600	A	B	2	2
9266	TraesCS2A01G063800	TraesCS2D01G062000	A	D	2	2
9272	TraesCS2A01G064600	TraesCS2B01G076800	A	B	2	2
9272	TraesCS2A01G064600	TraesCS2D01G062900	A	D	2	2
9280	TraesCS2A01G194700	TraesCS2B01G212100	A	B	2	2
9280	TraesCS2A01G194700	TraesCS2D01G193200	A	D	2	2
9281	TraesCS2A01G276200	TraesCS2B01G293900	A	B	2	2
9281	TraesCS2A01G276200	TraesCS2D01G275200	A	D	2	2
9290	TraesCS2A01G219300	TraesCS2B01G244900	A	B	2	2
9290	TraesCS2A01G219300	TraesCS2D01G224000	A	D	2	2
9291	TraesCS2A01G249300	TraesCS2B01G266100	A	B	2	2
9291	TraesCS2A01G249300	TraesCS2D01G250800	A	D	2	2
9308	TraesCS2A01G425900	TraesCS2B01G446200	A	B	2	2
9308	TraesCS2A01G425900	TraesCS2D01G423800	A	D	2	2
9316	TraesCS2A01G031800	TraesCS2B01G043500	A	B	2	2
9316	TraesCS2A01G031800	TraesCS2D01G031400	A	D	2	2
9323	TraesCS2A01G090500	TraesCS2B01G106000	A	B	2	2
9323	TraesCS2A01G090500	TraesCS2D01G088200	A	D	2	2
9326	TraesCS2A01G319000	TraesCS2B01G337300	A	B	2	2
9326	TraesCS2A01G319000	TraesCS2D01G316800	A	D	2	2
9344	TraesCS2A01G417900	TraesCS2B01G436800	A	B	2	2
9344	TraesCS2A01G417900	TraesCS2D01G415100	A	D	2	2
9345	TraesCS2A01G313900	TraesCS2B01G332500	A	B	2	2
9345	TraesCS2A01G313900	TraesCS2D01G312200	A	D	2	2
9379	TraesCS2A01G199900	TraesCS2B01G227500	A	B	2	2
9379	TraesCS2A01G199900	TraesCS2D01G207800	A	D	2	2
9382	TraesCS2A01G218200	TraesCS2B01G243600	A	B	2	2
9382	TraesCS2A01G218200	TraesCS2D01G225200	A	D	2	2
9386	TraesCS2A01G204500	TraesCS2B01G232000	A	B	2	2
9386	TraesCS2A01G204500	TraesCS2D01G211400	A	D	2	2
9387	TraesCS2A01G462600	TraesCS2B01G484200	A	B	2	2
9387	TraesCS2A01G462600	TraesCS2D01G463000	A	D	2	2
9393	TraesCS2A01G416000	TraesCS2B01G435000	A	B	2	2
9393	TraesCS2A01G416000	TraesCS2D01G413000	A	D	2	2
9397	TraesCS2A01G158900	TraesCS2B01G184500	A	B	2	2
9397	TraesCS2A01G158900	TraesCS2D01G165900	A	D	2	2
9426	TraesCS2A01G221100	TraesCS2B01G246800	A	B	2	2
9426	TraesCS2A01G221100	TraesCS2D01G226800	A	D	2	2
9429	TraesCS2A01G122400	TraesCS2B01G144600	A	B	2	2
9444	TraesCS2A01G309400	TraesCS2B01G326600	A	B	2	2
9444	TraesCS2A01G309400	TraesCS2D01G307700	A	D	2	2
9452	TraesCS2A01G097000	TraesCS2B01G112300	A	B	2	2
9452	TraesCS2A01G097000	TraesCS2D01G095700	A	D	2	2
9468	TraesCS2A01G268500	TraesCS2B01G287300	A	B	2	2
9468	TraesCS2A01G268500	TraesCS2D01G267500	A	D	2	2
9469	TraesCS2A01G187800	TraesCS2B01G219300	A	B	2	2
9469	TraesCS2A01G187800	TraesCS2D01G199900	A	D	2	2
9493	TraesCS2A01G133100	TraesCS2B01G156600	A	B	2	2
9493	TraesCS2A01G133100	TraesCS2D01G135100	A	D	2	2
9495	TraesCS2A01G544000	TraesCS2B01G574200	A	B	2	2
9495	TraesCS2A01G544000	TraesCS2D01G545200	A	D	2	2
9500	TraesCS2A01G409100	TraesCS2B01G427600	A	B	2	2
9500	TraesCS2A01G409100	TraesCS2D01G405700	A	D	2	2
9502	TraesCS2A01G333400	TraesCS2B01G346700	A	B	2	2
9502	TraesCS2A01G333400	TraesCS2D01G327600	A	D	2	2
9506	TraesCS2A01G575700	TraesCS2B01G611600	A	B	2	2
9506	TraesCS2A01G575700	TraesCS2D01G586500	A	D	2	2
9508	TraesCS2A01G492300	TraesCS2B01G520500	A	B	2	2
9508	TraesCS2A01G492300	TraesCS2D01G492600	A	D	2	2
9512	TraesCS2A01G125300	TraesCS2B01G147800	A	B	2	2
9512	TraesCS2A01G125300	TraesCS2D01G128400	A	D	2	2
9513	TraesCS2A01G552700	TraesCS2B01G584000	A	B	2	2
9513	TraesCS2A01G552700	TraesCS2D01G553300	A	D	2	2
9514	TraesCS2A01G526700	TraesCS2B01G557000	A	B	2	2
9514	TraesCS2A01G526700	TraesCS2D01G529400	A	D	2	2
9522	TraesCS2A01G191400	TraesCS2B01G215300	A	B	2	2
9522	TraesCS2A01G191400	TraesCS2D01G196200	A	D	2	2
9524	TraesCS2A01G255400	TraesCS2B01G287100	A	B	2	2
9524	TraesCS2A01G255400	TraesCS2D01G267300	A	D	2	2
9527	TraesCS2A01G402000	TraesCS2B01G420100	A	B	2	2
9527	TraesCS2A01G402000	TraesCS2D01G399400	A	D	2	2
9533	TraesCS2A01G346700	TraesCS2B01G365000	A	B	2	2
9533	TraesCS2A01G346700	TraesCS2D01G345400	A	D	2	2
9545	TraesCS2A01G005300	TraesCS2B01G016100	A	B	2	2
9545	TraesCS2A01G005300	TraesCS2D01G006400	A	D	2	2
9555	TraesCS2A01G195500	TraesCS2D01G192200	A	D	2	2
9555	TraesCS2A01G195500	TraesCS5B01G270400	A	B	2	5
9562	TraesCS2A01G292400	TraesCS2B01G308900	A	B	2	2
9562	TraesCS2A01G292400	TraesCS2D01G290300	A	D	2	2
9565	TraesCS2A01G583100	TraesCS2B01G603500	A	B	2	2
9565	TraesCS2A01G583100	TraesCS2D01G597000	A	D	2	2
9571	TraesCS2A01G217700	TraesCS2B01G243200	A	B	2	2
9571	TraesCS2A01G217700	TraesCS2D01G223600	A	D	2	2
9597	TraesCS2A01G327700	TraesCS2B01G354300	A	B	2	2
9597	TraesCS2A01G327700	TraesCS2D01G335200	A	D	2	2
9622	TraesCS2A01G220900	TraesCS2B01G246500	A	B	2	2
9622	TraesCS2A01G220900	TraesCS2D01G226600	A	D	2	2
9625	TraesCS2A01G320100	TraesCS2B01G363200	A	B	2	2
9625	TraesCS2A01G320100	TraesCS2D01G343200	A	D	2	2
9626	TraesCS2A01G229400	TraesCS2B01G254000	A	B	2	2
9626	TraesCS2A01G229400	TraesCS2D01G237300	A	D	2	2
9650	TraesCS2A01G427300	TraesCS2B01G447800	A	B	2	2
9650	TraesCS2A01G427300	TraesCS2D01G425400	A	D	2	2
9653	TraesCS2A01G331900	TraesCS2B01G350300	A	B	2	2
9653	TraesCS2A01G331900	TraesCS2D01G331000	A	D	2	2
9665	TraesCS2A01G156200	TraesCS2B01G181700	A	B	2	2
9665	TraesCS2A01G156200	TraesCS2D01G162000	A	D	2	2
9687	TraesCS2A01G424700	TraesCS2B01G444400	A	B	2	2
9687	TraesCS2A01G424700	TraesCS2D01G422600	A	D	2	2
9690	TraesCS2A01G089600	TraesCS2B01G105500	A	B	2	2
9690	TraesCS2A01G089600	TraesCS2D01G087700	A	D	2	2
9707	TraesCS2A01G309500	TraesCS2D01G307800	A	D	2	2
9709	TraesCS2A01G292700	TraesCS2B01G309100	A	B	2	2
9709	TraesCS2A01G292700	TraesCS2D01G290500	A	D	2	2
9712	TraesCS2A01G196600	TraesCS2B01G224200	A	B	2	2
9712	TraesCS2A01G196600	TraesCS2D01G204600	A	D	2	2
9726	TraesCS2A01G035700	TraesCS2B01G048700	A	B	2	2
9737	TraesCS2A01G147100	TraesCS2B01G172600	A	B	2	2
9737	TraesCS2A01G147100	TraesCS2D01G151900	A	D	2	2
9738	TraesCS2A01G372900	TraesCS2B01G389900	A	B	2	2
9738	TraesCS2A01G372900	TraesCS2D01G369100	A	D	2	2
9741	TraesCS2A01G373300	TraesCS2B01G390400	A	B	2	2
9741	TraesCS2A01G373300	TraesCS2D01G369500	A	D	2	2
9744	TraesCS2A01G226300	TraesCS2B01G249600	A	B	2	2
9744	TraesCS2A01G226300	TraesCS2D01G231800	A	D	2	2
9745	TraesCS2A01G303600	TraesCS2B01G320200	A	B	2	2
9749	TraesCS2A01G376600	TraesCS2B01G393700	A	B	2	2
9749	TraesCS2A01G376600	TraesCS2D01G373000	A	D	2	2
9754	TraesCS2A01G046200	TraesCS2B01G058300	A	B	2	2
9755	TraesCS2A01G129100	TraesCS2B01G151200	A	B	2	2
9770	TraesCS2A01G146100	TraesCS2B01G171500	A	B	2	2
9770	TraesCS2A01G146100	TraesCS2D01G150700	A	D	2	2
9775	TraesCS2A01G226700	TraesCS2B01G254400	A	B	2	2
9775	TraesCS2A01G226700	TraesCS2D01G236700	A	D	2	2
9777	TraesCS2A01G368600	TraesCS2B01G385800	A	B	2	2
9777	TraesCS2A01G368600	TraesCS2D01G365400	A	D	2	2
9778	TraesCS2A01G512500	TraesCS2B01G540400	A	B	2	2
9778	TraesCS2A01G512500	TraesCS2D01G513900	A	D	2	2
9780	TraesCS2A01G297300	TraesCS2B01G313500	A	B	2	2
9780	TraesCS2A01G297300	TraesCS2D01G295200	A	D	2	2
9782	TraesCS2A01G239500	TraesCS2B01G269700	A	B	2	2
9782	TraesCS2A01G239500	TraesCS2D01G244500	A	D	2	2
9783	TraesCS2A01G205700	TraesCS2B01G233000	A	B	2	2
9783	TraesCS2A01G205700	TraesCS2D01G210400	A	D	2	2
9786	TraesCS2A01G171900	TraesCS2B01G198300	A	B	2	2
9802	TraesCS2A01G198600	TraesCS2B01G226000	A	B	2	2
9802	TraesCS2A01G198600	TraesCS2D01G206400	A	D	2	2
9804	TraesCS2A01G106100	TraesCS2B01G123100	A	B	2	2
9804	TraesCS2A01G106100	TraesCS2D01G105700	A	D	2	2
9811	TraesCS2A01G298400	TraesCS2B01G314900	A	B	2	2
9811	TraesCS2A01G298400	TraesCS2D01G296500	A	D	2	2
9821	TraesCS2A01G455800	TraesCS2B01G477800	A	B	2	2
9821	TraesCS2A01G455800	TraesCS2D01G456100	A	D	2	2
9825	TraesCS2A01G317100	TraesCS2B01G335300	A	B	2	2
9825	TraesCS2A01G317100	TraesCS2D01G315000	A	D	2	2
9833	TraesCS2A01G124400	TraesCS2B01G146200	A	B	2	2
9833	TraesCS2A01G124400	TraesCS2D01G127200	A	D	2	2
9834	TraesCS2A01G283900	TraesCS2B01G300900	A	B	2	2
9834	TraesCS2A01G283900	TraesCS2D01G282900	A	D	2	2
9839	TraesCS2A01G556200	TraesCS2B01G586500	A	B	2	2
9839	TraesCS2A01G556200	TraesCS2D01G557400	A	D	2	2
9840	TraesCS2A01G070500	TraesCS2B01G084200	A	B	2	2
9842	TraesCS2A01G096800	TraesCS2B01G112100	A	B	2	2
9842	TraesCS2A01G096800	TraesCS2D01G095300	A	D	2	2
9843	TraesCS2A01G377000	TraesCS2B01G394200	A	B	2	2
9843	TraesCS2A01G377000	TraesCS2D01G373600	A	D	2	2
9862	TraesCS2A01G232200	TraesCS2B01G250800	A	B	2	2
9862	TraesCS2A01G232200	TraesCS2D01G232900	A	D	2	2
9863	TraesCS2A01G500300	TraesCS2B01G528200	A	B	2	2
9863	TraesCS2A01G500300	TraesCS2D01G500500	A	D	2	2
9873	TraesCS2A01G280100	TraesCS2B01G297600	A	B	2	2
9873	TraesCS2A01G280100	TraesCS2D01G279100	A	D	2	2
9874	TraesCS2A01G264300	TraesCS2B01G277800	A	B	2	2
9874	TraesCS2A01G264300	TraesCS2D01G259600	A	D	2	2
9885	TraesCS2A01G266700	TraesCS2B01G275700	A	B	2	2
9885	TraesCS2A01G266700	TraesCS2D01G257400	A	D	2	2
9887	TraesCS2A01G319700	TraesCS2D01G328000	A	D	2	2
9887	TraesCS2A01G333800	TraesCS2D01G328000	A	D	2	2
9899	TraesCS2A01G517900	TraesCS2B01G546500	A	B	2	2
9899	TraesCS2A01G517900	TraesCS2D01G519500	A	D	2	2
9900	TraesCS2A01G563100	TraesCS2B01G623400	A	B	2	2
9900	TraesCS2A01G563100	TraesCS2D01G572300	A	D	2	2
9905	TraesCS2A01G290300	TraesCS2B01G306800	A	B	2	2
9905	TraesCS2A01G290300	TraesCS2D01G288200	A	D	2	2
9914	TraesCS2A01G057900	TraesCS2B01G073100	A	B	2	2
9914	TraesCS2A01G057900	TraesCS2D01G056500	A	D	2	2
9915	TraesCS2A01G115400	TraesCS2B01G135100	A	B	2	2
9915	TraesCS2A01G115400	TraesCS2D01G119700	A	D	2	2
9918	TraesCS2A01G119500	TraesCS2B01G140200	A	B	2	2
9918	TraesCS2A01G119500	TraesCS2D01G121300	A	D	2	2
9929	TraesCS2A01G259600	TraesCS2B01G282300	A	B	2	2
9929	TraesCS2A01G259600	TraesCS2D01G263800	A	D	2	2
9932	TraesCS2A01G222000	TraesCS2B01G247500	A	B	2	2
9932	TraesCS2A01G222000	TraesCS2D01G228000	A	D	2	2
9943	TraesCS2A01G552300	TraesCS2B01G583700	A	B	2	2
9943	TraesCS2A01G552300	TraesCS2D01G553200	A	D	2	2
9945	TraesCS2A01G097600	TraesCS2B01G113300	A	B	2	2
9945	TraesCS2A01G097600	TraesCS2D01G096900	A	D	2	2
9947	TraesCS2A01G191500	TraesCS2B01G215200	A	B	2	2
9947	TraesCS2A01G191500	TraesCS2D01G196100	A	D	2	2
9955	TraesCS2A01G372800	TraesCS2B01G389800	A	B	2	2
9955	TraesCS2A01G372800	TraesCS2D01G369000	A	D	2	2
9965	TraesCS2A01G455100	TraesCS2B01G477200	A	B	2	2
9965	TraesCS2A01G455100	TraesCS2D01G455500	A	D	2	2
9968	TraesCS2A01G435000	TraesCS2B01G458100	A	B	2	2
9968	TraesCS2A01G435000	TraesCS2D01G435000	A	D	2	2
9969	TraesCS2A01G114400	TraesCS2B01G133500	A	B	2	2
9969	TraesCS2A01G114400	TraesCS2D01G115200	A	D	2	2
9970	TraesCS2A01G257300	TraesCS2B01G285200	A	B	2	2
9970	TraesCS2A01G257300	TraesCS2D01G265500	A	D	2	2
9981	TraesCS2A01G401300	TraesCS2B01G419300	A	B	2	2
10015	TraesCS2A01G055800	TraesCS3B01G302200	A	B	2	3
10034	TraesCS2A01G296400	TraesCS2B01G312600	A	B	2	2
10034	TraesCS2A01G296400	TraesCS2D01G294300	A	D	2	2
10044	TraesCS2A01G413000	TraesCS2B01G431200	A	B	2	2
10044	TraesCS2A01G413000	TraesCS2D01G410200	A	D	2	2
10059	TraesCS2A01G272800	TraesCS2B01G291000	A	B	2	2
10059	TraesCS2A01G272800	TraesCS2D01G272100	A	D	2	2
10113	TraesCS2A01G195100	TraesCS2B01G211700	A	B	2	2
10114	TraesCS2A01G195400	TraesCS1B01G294100	A	B	2	1
10114	TraesCS2A01G195400	TraesCS2B01G211200	A	B	2	2
10114	TraesCS2A01G195400	TraesCS2D01G192600	A	D	2	2
10115	TraesCS2A01G195200	TraesCS2D01G192700	A	D	2	2
10116	TraesCS2A01G427200	TraesCS2B01G447600	A	B	2	2
10116	TraesCS2A01G427200	TraesCS2D01G425300	A	D	2	2
10117	TraesCS2A01G427100	TraesCS2B01G447500	A	B	2	2
10117	TraesCS2A01G427100	TraesCS2D01G425200	A	D	2	2
10131	TraesCS2A01G208500	TraesCS2B01G234900	A	B	2	2
10131	TraesCS2A01G208500	TraesCS2D01G215200	A	D	2	2
10140	TraesCS2A01G351400	TraesCS2B01G369500	A	B	2	2
10140	TraesCS2A01G351400	TraesCS2D01G349500	A	D	2	2
10150	TraesCS2A01G450600	TraesCS2B01G472200	A	B	2	2
10150	TraesCS2A01G450600	TraesCS2D01G450200	A	D	2	2
10151	TraesCS2A01G438100	TraesCS1B01G044500	A	B	2	1
10156	TraesCS2A01G400500	TraesCS2B01G418600	A	B	2	2
10156	TraesCS2A01G400500	TraesCS2D01G398100	A	D	2	2
10171	TraesCS2A01G279600	TraesCS2B01G297300	A	B	2	2
10171	TraesCS2A01G279600	TraesCS2D01G278500	A	D	2	2
10174	TraesCS2A01G384100	TraesCS2B01G401300	A	B	2	2
10174	TraesCS2A01G384100	TraesCS2D01G380500	A	D	2	2
10177	TraesCS2A01G388100	TraesCS2B01G406100	A	B	2	2
10177	TraesCS2A01G388100	TraesCS2D01G385900	A	D	2	2
10178	TraesCS2A01G150600	TraesCS2B01G175800	A	B	2	2
10178	TraesCS2A01G150600	TraesCS2D01G155700	A	D	2	2
10179	TraesCS2A01G330900	TraesCS2B01G351400	A	B	2	2
10179	TraesCS2A01G330900	TraesCS2D01G332100	A	D	2	2
10181	TraesCS2A01G500000	TraesCS2B01G528000	A	B	2	2
10181	TraesCS2A01G500000	TraesCS2D01G500200	A	D	2	2
10186	TraesCS2A01G416600	TraesCS2B01G435600	A	B	2	2
10186	TraesCS2A01G416600	TraesCS2D01G413600	A	D	2	2
10197	TraesCS2A01G517300	TraesCS2B01G545900	A	B	2	2
10197	TraesCS2A01G517300	TraesCS2D01G518900	A	D	2	2
10231	TraesCS2A01G514100	TraesCS2B01G542500	A	B	2	2
10231	TraesCS2A01G514100	TraesCS2D01G515700	A	D	2	2
10239	TraesCS2A01G232900	TraesCS2B01G250400	A	B	2	2
10239	TraesCS2A01G232900	TraesCS2D01G232600	A	D	2	2
10250	TraesCS2A01G077600	TraesCS2B01G092100	A	B	2	2
10268	TraesCS2A01G223000	TraesCS2B01G248600	A	B	2	2
10268	TraesCS2A01G223000	TraesCS2D01G229000	A	D	2	2
10272	TraesCS2A01G327000	TraesCS2B01G355000	A	B	2	2
10272	TraesCS2A01G327000	TraesCS2D01G335900	A	D	2	2
10280	TraesCS2A01G422900	TraesCS2B01G442500	A	B	2	2
10280	TraesCS2A01G422900	TraesCS2D01G420500	A	D	2	2
10285	TraesCS2A01G202700	TraesCS2B01G229800	A	B	2	2
10285	TraesCS2A01G202700	TraesCS2D01G213000	A	D	2	2
10286	TraesCS2A01G507200	TraesCS2B01G535200	A	B	2	2
10286	TraesCS2A01G507200	TraesCS2D01G507600	A	D	2	2
10287	TraesCS2A01G284800	TraesCS2B01G301900	A	B	2	2
10287	TraesCS2A01G284800	TraesCS2D01G283500	A	D	2	2
10288	TraesCS2A01G484300	TraesCS2B01G509800	A	B	2	2
10288	TraesCS2A01G484300	TraesCS2B01G510400	A	B	2	2
10288	TraesCS2A01G484300	TraesCS2D01G484400	A	D	2	2
10289	TraesCS2A01G083500	TraesCS2B01G097500	A	B	2	2
10289	TraesCS2A01G083500	TraesCS2D01G081100	A	D	2	2
10294	TraesCS2A01G298500	TraesCS2B01G315000	A	B	2	2
10294	TraesCS2A01G298500	TraesCS2D01G296600	A	D	2	2
10310	TraesCS2A01G318100	TraesCS2B01G336200	A	B	2	2
10310	TraesCS2A01G318100	TraesCS2D01G315700	A	D	2	2
10312	TraesCS2A01G559800	TraesCS2D01G570300	A	D	2	2
10313	TraesCS2A01G559700	TraesCS2B01G620000	A	B	2	2
10313	TraesCS2A01G559700	TraesCS2D01G570400	A	D	2	2
10327	TraesCS2A01G513700	TraesCS2D01G515300	A	D	2	2
10328	TraesCS2A01G513500	TraesCS2B01G541800	A	B	2	2
10328	TraesCS2A01G513500	TraesCS2D01G515200	A	D	2	2
10328	TraesCS2A01G513600	TraesCS2B01G541800	A	B	2	2
10328	TraesCS2A01G513600	TraesCS2D01G515200	A	D	2	2
10341	TraesCS2A01G220200	TraesCS2B01G245800	A	B	2	2
10341	TraesCS2A01G220200	TraesCS2D01G225900	A	D	2	2
10353	TraesCS2A01G346000	TraesCS2B01G364400	A	B	2	2
10353	TraesCS2A01G346000	TraesCS2D01G344700	A	D	2	2
10381	TraesCS2A01G203900	TraesCS2B01G231500	A	B	2	2
10381	TraesCS2A01G203900	TraesCS2D01G211800	A	D	2	2
10385	TraesCS2A01G340400	TraesCS2B01G338300	A	B	2	2
10385	TraesCS2A01G340400	TraesCS2D01G318100	A	D	2	2
10394	TraesCS2A01G381300	TraesCS2B01G398600	A	B	2	2
10394	TraesCS2A01G381300	TraesCS2D01G377800	A	D	2	2
10398	TraesCS2A01G443300	TraesCS2B01G464400	A	B	2	2
10398	TraesCS2A01G443300	TraesCS2D01G442500	A	D	2	2
10401	TraesCS2A01G189700	TraesCS2B01G217400	A	B	2	2
10401	TraesCS2A01G189700	TraesCS2D01G198100	A	D	2	2
10408	TraesCS2A01G539700	TraesCS2B01G570000	A	B	2	2
10408	TraesCS2A01G539700	TraesCS2D01G541300	A	D	2	2
10444	TraesCS2A01G230100	TraesCS2B01G251700	A	B	2	2
10444	TraesCS2A01G230100	TraesCS2D01G233800	A	D	2	2
10454	TraesCS2A01G173300	TraesCS2B01G199500	A	B	2	2
10454	TraesCS2A01G173300	TraesCS2D01G180400	A	D	2	2
10467	TraesCS2A01G335000	TraesCS2B01G348200	A	B	2	2
10467	TraesCS2A01G335000	TraesCS2D01G329300	A	D	2	2
10468	TraesCS2A01G403700	TraesCS2B01G421700	A	B	2	2
10468	TraesCS2A01G403700	TraesCS2D01G400800	A	D	2	2
10476	TraesCS2A01G229100	TraesCS2B01G250500	A	B	2	2
10476	TraesCS2A01G229100	TraesCS2D01G233300	A	D	2	2
10480	TraesCS2A01G478600	TraesCS2D01G477900	A	D	2	2
10485	TraesCS2A01G421100	TraesCS2B01G440200	A	B	2	2
10485	TraesCS2A01G421100	TraesCS2D01G418200	A	D	2	2
10491	TraesCS2A01G048700	TraesCS2B01G062300	A	B	2	2
10491	TraesCS2A01G048700	TraesCS2D01G047600	A	D	2	2
10492	TraesCS2A01G048800	TraesCS2B01G062200	A	B	2	2
10492	TraesCS2A01G048800	TraesCS2D01G047700	A	D	2	2
10498	TraesCS2A01G409000	TraesCS2B01G427500	A	B	2	2
10498	TraesCS2A01G409000	TraesCS2D01G405800	A	D	2	2
10499	TraesCS2A01G473200	TraesCS2B01G495800	A	B	2	2
10499	TraesCS2A01G473200	TraesCS2D01G473100	A	D	2	2
10517	TraesCS2A01G521600	TraesCS2B01G551100	A	B	2	2
10517	TraesCS2A01G521600	TraesCS2D01G523400	A	D	2	2
10527	TraesCS2A01G463500	TraesCS2B01G485500	A	B	2	2
10527	TraesCS2A01G463500	TraesCS2D01G464700	A	D	2	2
10528	TraesCS2A01G180900	TraesCS2B01G207900	A	B	2	2
10528	TraesCS2A01G180900	TraesCS2D01G189200	A	D	2	2
10533	TraesCS2A01G426000	TraesCS2B01G446300	A	B	2	2
10533	TraesCS2A01G426000	TraesCS2D01G424100	A	D	2	2
10534	TraesCS2A01G453200	TraesCS2B01G474500	A	B	2	2
10534	TraesCS2A01G453200	TraesCS2D01G452800	A	D	2	2
10541	TraesCS2A01G581400	TraesCS2B01G609200	A	B	2	2
10541	TraesCS2A01G581400	TraesCS2D01G589800	A	D	2	2
10552	TraesCS2A01G339000	TraesCS2B01G343000	A	B	2	2
10552	TraesCS2A01G339000	TraesCS2D01G324100	A	D	2	2
10566	TraesCS2A01G394900	TraesCS2B01G412900	A	B	2	2
10566	TraesCS2A01G394900	TraesCS2D01G392900	A	D	2	2
10567	TraesCS2A01G206700	TraesCS2B01G233900	A	B	2	2
10567	TraesCS2A01G206700	TraesCS2D01G209200	A	D	2	2
10569	TraesCS2A01G335100	TraesCS2B01G348400	A	B	2	2
10569	TraesCS2A01G335100	TraesCS2D01G329400	A	D	2	2
10575	TraesCS2A01G587000	TraesCS2B01G596400	A	B	2	2
10594	TraesCS2A01G203700	TraesCS2B01G231000	A	B	2	2
10594	TraesCS2A01G203700	TraesCS2D01G212000	A	D	2	2
10603	TraesCS2A01G574600	TraesCS2B01G612300	A	B	2	2
10603	TraesCS2A01G574600	TraesCS2D01G585100	A	D	2	2
10609	TraesCS2A01G253800	TraesCS2B01G273400	A	B	2	2
[truncated: 7,074 more rows]
