# Supplementary material for: Cytological and molecular characterizations of a novel 2A nullisomic line derived from a widely-grown wheat cultivar Zhoumai 18 conferring male sterility
Source: PeerJ. 2020 Oct 30;8:e10275. doi: 10.7717/peerj.10275 (PMC7605228; doi:10.7717/peerj.10275)
Supplement: Table S8 [file peerj-08-10275-s009.xls]

## Sheet: Sheet1
Table S8. The list of chromosome 2A-specific genes.
#ID
TraesCS2A01G000500
TraesCS2A01G001500
TraesCS2A01G001700
TraesCS2A01G001800
TraesCS2A01G002000
TraesCS2A01G002200
TraesCS2A01G002300
TraesCS2A01G002700
TraesCS2A01G002800
TraesCS2A01G002900
TraesCS2A01G003100
TraesCS2A01G003200
TraesCS2A01G003300
TraesCS2A01G003400
TraesCS2A01G003500
TraesCS2A01G004000
TraesCS2A01G004300
TraesCS2A01G006100
TraesCS2A01G006200
TraesCS2A01G006300
TraesCS2A01G006400
TraesCS2A01G006500
TraesCS2A01G006600
TraesCS2A01G006700
TraesCS2A01G006800
TraesCS2A01G007500
TraesCS2A01G007600
TraesCS2A01G008000
TraesCS2A01G008100
TraesCS2A01G008300
TraesCS2A01G008500
TraesCS2A01G008800
TraesCS2A01G009000
TraesCS2A01G009100
TraesCS2A01G009200
TraesCS2A01G009700
TraesCS2A01G009800
TraesCS2A01G010700
TraesCS2A01G010800
TraesCS2A01G010900
TraesCS2A01G011500
TraesCS2A01G012100
TraesCS2A01G013000
TraesCS2A01G013200
TraesCS2A01G013300
TraesCS2A01G013600
TraesCS2A01G013700
TraesCS2A01G013800
TraesCS2A01G013900
TraesCS2A01G014000
TraesCS2A01G014400
TraesCS2A01G014500
TraesCS2A01G014700
TraesCS2A01G014800
TraesCS2A01G015000
TraesCS2A01G015300
TraesCS2A01G015700
TraesCS2A01G016200
TraesCS2A01G016900
TraesCS2A01G017300
TraesCS2A01G017400
TraesCS2A01G017600
TraesCS2A01G017800
TraesCS2A01G017900
TraesCS2A01G019300
TraesCS2A01G019500
TraesCS2A01G019700
TraesCS2A01G020500
TraesCS2A01G020600
TraesCS2A01G021400
TraesCS2A01G021500
TraesCS2A01G021600
TraesCS2A01G021800
TraesCS2A01G021900
TraesCS2A01G022300
TraesCS2A01G023900
TraesCS2A01G024300
TraesCS2A01G024400
TraesCS2A01G024900
TraesCS2A01G025200
TraesCS2A01G025600
TraesCS2A01G025700
TraesCS2A01G025900
TraesCS2A01G026100
TraesCS2A01G027300
TraesCS2A01G027900
TraesCS2A01G028500
TraesCS2A01G029100
TraesCS2A01G029200
TraesCS2A01G029400
TraesCS2A01G029500
TraesCS2A01G030700
TraesCS2A01G031000
TraesCS2A01G031300
TraesCS2A01G031400
TraesCS2A01G031600
TraesCS2A01G032000
TraesCS2A01G032200
TraesCS2A01G033100
TraesCS2A01G033900
TraesCS2A01G034600
TraesCS2A01G035000
TraesCS2A01G035600
TraesCS2A01G035900
TraesCS2A01G036000
TraesCS2A01G036700
TraesCS2A01G036800
TraesCS2A01G037000
TraesCS2A01G037100
TraesCS2A01G037600
TraesCS2A01G038300
TraesCS2A01G038400
TraesCS2A01G038500
TraesCS2A01G038700
TraesCS2A01G038900
TraesCS2A01G039400
TraesCS2A01G040400
TraesCS2A01G040600
TraesCS2A01G041000
TraesCS2A01G041200
TraesCS2A01G041800
TraesCS2A01G042500
TraesCS2A01G042700
TraesCS2A01G043100
TraesCS2A01G043300
TraesCS2A01G043400
TraesCS2A01G043500
TraesCS2A01G044100
TraesCS2A01G044200
TraesCS2A01G044600
TraesCS2A01G044800
TraesCS2A01G045300
TraesCS2A01G045600
TraesCS2A01G045900
TraesCS2A01G046500
TraesCS2A01G046600
TraesCS2A01G047200
TraesCS2A01G047300
TraesCS2A01G048000
TraesCS2A01G048100
TraesCS2A01G048200
TraesCS2A01G048400
TraesCS2A01G049600
TraesCS2A01G050200
TraesCS2A01G050700
TraesCS2A01G050800
TraesCS2A01G050900
TraesCS2A01G051000
TraesCS2A01G051100
TraesCS2A01G051800
TraesCS2A01G052300
TraesCS2A01G052600
TraesCS2A01G052700
TraesCS2A01G052900
TraesCS2A01G053000
TraesCS2A01G053100
TraesCS2A01G053400
TraesCS2A01G053600
TraesCS2A01G053700
TraesCS2A01G053800
TraesCS2A01G053900
TraesCS2A01G054300
TraesCS2A01G054700
TraesCS2A01G055000
TraesCS2A01G055500
TraesCS2A01G055900
TraesCS2A01G056000
TraesCS2A01G056800
TraesCS2A01G057200
TraesCS2A01G057300
TraesCS2A01G057700
TraesCS2A01G058500
TraesCS2A01G058800
TraesCS2A01G058900
TraesCS2A01G059100
TraesCS2A01G059200
TraesCS2A01G060000
TraesCS2A01G060300
TraesCS2A01G060500
TraesCS2A01G060800
TraesCS2A01G060900
TraesCS2A01G061200
TraesCS2A01G061800
TraesCS2A01G061900
TraesCS2A01G062100
TraesCS2A01G062200
TraesCS2A01G062500
TraesCS2A01G062600
TraesCS2A01G063000
TraesCS2A01G063100
TraesCS2A01G063400
TraesCS2A01G063700
TraesCS2A01G063900
TraesCS2A01G065900
TraesCS2A01G066000
TraesCS2A01G066900
TraesCS2A01G067100
TraesCS2A01G067200
TraesCS2A01G067900
TraesCS2A01G068300
TraesCS2A01G068600
TraesCS2A01G068700
TraesCS2A01G068900
TraesCS2A01G069000
TraesCS2A01G069100
TraesCS2A01G070200
TraesCS2A01G070700
TraesCS2A01G071000
TraesCS2A01G071300
TraesCS2A01G071400
TraesCS2A01G071700
TraesCS2A01G072000
TraesCS2A01G073200
TraesCS2A01G073300
TraesCS2A01G073400
TraesCS2A01G073600
TraesCS2A01G073900
TraesCS2A01G074200
TraesCS2A01G074300
TraesCS2A01G074600
TraesCS2A01G074900
TraesCS2A01G075100
TraesCS2A01G075600
TraesCS2A01G075700
TraesCS2A01G076300
TraesCS2A01G077100
TraesCS2A01G077200
TraesCS2A01G077300
TraesCS2A01G077400
TraesCS2A01G077500
TraesCS2A01G078300
TraesCS2A01G078400
TraesCS2A01G078500
TraesCS2A01G078600
TraesCS2A01G078700
TraesCS2A01G078800
TraesCS2A01G079000
TraesCS2A01G079100
TraesCS2A01G079800
TraesCS2A01G080500
TraesCS2A01G081000
TraesCS2A01G081600
TraesCS2A01G081700
TraesCS2A01G083200
TraesCS2A01G083300
TraesCS2A01G084600
TraesCS2A01G085400
TraesCS2A01G085500
TraesCS2A01G085800
TraesCS2A01G085900
TraesCS2A01G086100
TraesCS2A01G086200
TraesCS2A01G086500
TraesCS2A01G087300
TraesCS2A01G087500
TraesCS2A01G087600
TraesCS2A01G087900
TraesCS2A01G088700
TraesCS2A01G088800
TraesCS2A01G089200
TraesCS2A01G089700
TraesCS2A01G089800
TraesCS2A01G090100
TraesCS2A01G090300
TraesCS2A01G090700
TraesCS2A01G090800
TraesCS2A01G090900
TraesCS2A01G091200
TraesCS2A01G091500
TraesCS2A01G092000
TraesCS2A01G092600
TraesCS2A01G093100
TraesCS2A01G093200
TraesCS2A01G093500
TraesCS2A01G093900
TraesCS2A01G094300
TraesCS2A01G094400
TraesCS2A01G094700
TraesCS2A01G095600
TraesCS2A01G095900
TraesCS2A01G096100
TraesCS2A01G096700
TraesCS2A01G097400
TraesCS2A01G098100
TraesCS2A01G099000
TraesCS2A01G099100
TraesCS2A01G099700
TraesCS2A01G100200
TraesCS2A01G101000
TraesCS2A01G101100
TraesCS2A01G101300
TraesCS2A01G101500
TraesCS2A01G101800
TraesCS2A01G102800
TraesCS2A01G103000
TraesCS2A01G104400
TraesCS2A01G105000
TraesCS2A01G105100
TraesCS2A01G106300
TraesCS2A01G107000
TraesCS2A01G107300
TraesCS2A01G107900
TraesCS2A01G108200
TraesCS2A01G109300
TraesCS2A01G110000
TraesCS2A01G110900
TraesCS2A01G111400
TraesCS2A01G111900
TraesCS2A01G112000
TraesCS2A01G112100
TraesCS2A01G112200
TraesCS2A01G113300
TraesCS2A01G113400
TraesCS2A01G114300
TraesCS2A01G114500
TraesCS2A01G114600
TraesCS2A01G115600
TraesCS2A01G117100
TraesCS2A01G117700
TraesCS2A01G118400
TraesCS2A01G118500
TraesCS2A01G119000
TraesCS2A01G121400
TraesCS2A01G122800
TraesCS2A01G123500
TraesCS2A01G123600
TraesCS2A01G124900
TraesCS2A01G125000
TraesCS2A01G125800
TraesCS2A01G125900
TraesCS2A01G126000
TraesCS2A01G126100
TraesCS2A01G126200
TraesCS2A01G126300
TraesCS2A01G126400
TraesCS2A01G126600
TraesCS2A01G127000
TraesCS2A01G127600
TraesCS2A01G128400
TraesCS2A01G129400
TraesCS2A01G130000
TraesCS2A01G130100
TraesCS2A01G130400
TraesCS2A01G130500
TraesCS2A01G131100
TraesCS2A01G131900
TraesCS2A01G132000
TraesCS2A01G132700
TraesCS2A01G134200
TraesCS2A01G134600
TraesCS2A01G135000
TraesCS2A01G135100
TraesCS2A01G136300
TraesCS2A01G136400
TraesCS2A01G136900
TraesCS2A01G137400
TraesCS2A01G137900
TraesCS2A01G138400
TraesCS2A01G138800
TraesCS2A01G139400
TraesCS2A01G139500
TraesCS2A01G139700
TraesCS2A01G140300
TraesCS2A01G140500
TraesCS2A01G140800
TraesCS2A01G141000
TraesCS2A01G141200
TraesCS2A01G142000
TraesCS2A01G142100
TraesCS2A01G142600
TraesCS2A01G143800
TraesCS2A01G144000
TraesCS2A01G144300
TraesCS2A01G144900
TraesCS2A01G145100
TraesCS2A01G145600
TraesCS2A01G146300
TraesCS2A01G146500
TraesCS2A01G147000
TraesCS2A01G148300
TraesCS2A01G148800
TraesCS2A01G149000
TraesCS2A01G149800
TraesCS2A01G150100
TraesCS2A01G151400
TraesCS2A01G151900
TraesCS2A01G153100
TraesCS2A01G153800
TraesCS2A01G155400
TraesCS2A01G155800
TraesCS2A01G156400
TraesCS2A01G156500
TraesCS2A01G157200
TraesCS2A01G158100
TraesCS2A01G158600
TraesCS2A01G158700
TraesCS2A01G159200
TraesCS2A01G160600
TraesCS2A01G160900
TraesCS2A01G161900
TraesCS2A01G162800
TraesCS2A01G163500
TraesCS2A01G164200
TraesCS2A01G164900
TraesCS2A01G165400
TraesCS2A01G165700
TraesCS2A01G166100
TraesCS2A01G167200
TraesCS2A01G167700
TraesCS2A01G167900
TraesCS2A01G169500
TraesCS2A01G170500
TraesCS2A01G170700
TraesCS2A01G171200
TraesCS2A01G171400
TraesCS2A01G172200
TraesCS2A01G172300
TraesCS2A01G173900
TraesCS2A01G174200
TraesCS2A01G175300
TraesCS2A01G176700
TraesCS2A01G176900
TraesCS2A01G177600
TraesCS2A01G178000
TraesCS2A01G178600
TraesCS2A01G178700
TraesCS2A01G180100
TraesCS2A01G180300
TraesCS2A01G180400
TraesCS2A01G180500
TraesCS2A01G181000
TraesCS2A01G181300
TraesCS2A01G181500
TraesCS2A01G181600
TraesCS2A01G183200
TraesCS2A01G185100
TraesCS2A01G186100
TraesCS2A01G186500
TraesCS2A01G188300
TraesCS2A01G188800
TraesCS2A01G189300
TraesCS2A01G189400
TraesCS2A01G190600
TraesCS2A01G191600
TraesCS2A01G191800
TraesCS2A01G193500
TraesCS2A01G193600
TraesCS2A01G194100
TraesCS2A01G195700
TraesCS2A01G196300
TraesCS2A01G197000
TraesCS2A01G198100
TraesCS2A01G198300
TraesCS2A01G199200
TraesCS2A01G200100
TraesCS2A01G201500
TraesCS2A01G202000
TraesCS2A01G203300
TraesCS2A01G203800
TraesCS2A01G204000
TraesCS2A01G204100
TraesCS2A01G205800
TraesCS2A01G206900
TraesCS2A01G208600
TraesCS2A01G208700
TraesCS2A01G208800
TraesCS2A01G208900
TraesCS2A01G209000
TraesCS2A01G209800
TraesCS2A01G210200
TraesCS2A01G210500
TraesCS2A01G210600
TraesCS2A01G211000
TraesCS2A01G211400
TraesCS2A01G211700
TraesCS2A01G212500
TraesCS2A01G212600
TraesCS2A01G212800
TraesCS2A01G213100
TraesCS2A01G215200
TraesCS2A01G215400
TraesCS2A01G217100
TraesCS2A01G217400
TraesCS2A01G217800
TraesCS2A01G217900
TraesCS2A01G218100
TraesCS2A01G219500
TraesCS2A01G220000
TraesCS2A01G220300
TraesCS2A01G220500
TraesCS2A01G221500
TraesCS2A01G221600
TraesCS2A01G222100
TraesCS2A01G222900
TraesCS2A01G223900
TraesCS2A01G224400
TraesCS2A01G224700
TraesCS2A01G224800
TraesCS2A01G225000
TraesCS2A01G225700
TraesCS2A01G225800
TraesCS2A01G226600
TraesCS2A01G226900
TraesCS2A01G227600
TraesCS2A01G227700
TraesCS2A01G227800
TraesCS2A01G227900
TraesCS2A01G228100
TraesCS2A01G228400
TraesCS2A01G228500
TraesCS2A01G228700
TraesCS2A01G228900
TraesCS2A01G229000
TraesCS2A01G229700
TraesCS2A01G229800
TraesCS2A01G230300
TraesCS2A01G230500
TraesCS2A01G230800
TraesCS2A01G231100
TraesCS2A01G231200
TraesCS2A01G231400
TraesCS2A01G231700
TraesCS2A01G231800
TraesCS2A01G232000
TraesCS2A01G232100
TraesCS2A01G232300
TraesCS2A01G232500
TraesCS2A01G232600
TraesCS2A01G232700
TraesCS2A01G233200
TraesCS2A01G233500
TraesCS2A01G233600
TraesCS2A01G233900
TraesCS2A01G234000
TraesCS2A01G234100
TraesCS2A01G234300
TraesCS2A01G234500
TraesCS2A01G235100
TraesCS2A01G235200
TraesCS2A01G235800
TraesCS2A01G236100
TraesCS2A01G236400
TraesCS2A01G236500
TraesCS2A01G236700
TraesCS2A01G236800
TraesCS2A01G236900
TraesCS2A01G238300
TraesCS2A01G238500
TraesCS2A01G239300
TraesCS2A01G239400
TraesCS2A01G239600
TraesCS2A01G240100
TraesCS2A01G240500
TraesCS2A01G240600
TraesCS2A01G240800
TraesCS2A01G240900
TraesCS2A01G241000
TraesCS2A01G241100
TraesCS2A01G241300
TraesCS2A01G241800
TraesCS2A01G241900
TraesCS2A01G242000
TraesCS2A01G242100
TraesCS2A01G242200
TraesCS2A01G242300
TraesCS2A01G242400
TraesCS2A01G242600
TraesCS2A01G242700
TraesCS2A01G243100
TraesCS2A01G243200
TraesCS2A01G243600
TraesCS2A01G243700
TraesCS2A01G243800
TraesCS2A01G243900
TraesCS2A01G244000
TraesCS2A01G244300
TraesCS2A01G244400
TraesCS2A01G244500
TraesCS2A01G244600
TraesCS2A01G244700
TraesCS2A01G244800
TraesCS2A01G244900
TraesCS2A01G245000
TraesCS2A01G245300
TraesCS2A01G245400
TraesCS2A01G245600
TraesCS2A01G246500
TraesCS2A01G247000
TraesCS2A01G247100
TraesCS2A01G247200
TraesCS2A01G247400
TraesCS2A01G247500
TraesCS2A01G247600
TraesCS2A01G247900
TraesCS2A01G248100
TraesCS2A01G248900
TraesCS2A01G249200
TraesCS2A01G250000
TraesCS2A01G250100
TraesCS2A01G250400
TraesCS2A01G250500
TraesCS2A01G250700
TraesCS2A01G251200
TraesCS2A01G251300
TraesCS2A01G251500
TraesCS2A01G252000
TraesCS2A01G253300
TraesCS2A01G253400
TraesCS2A01G253600
TraesCS2A01G254000
TraesCS2A01G254900
TraesCS2A01G256800
TraesCS2A01G257100
TraesCS2A01G257400
TraesCS2A01G257500
TraesCS2A01G257600
TraesCS2A01G257700
TraesCS2A01G257800
TraesCS2A01G257900
TraesCS2A01G258000
TraesCS2A01G258100
TraesCS2A01G258200
TraesCS2A01G258300
TraesCS2A01G258400
TraesCS2A01G259500
TraesCS2A01G260300
TraesCS2A01G260800
TraesCS2A01G260900
TraesCS2A01G261500
TraesCS2A01G263000
TraesCS2A01G263700
TraesCS2A01G264200
TraesCS2A01G264400
TraesCS2A01G264600
TraesCS2A01G264700
TraesCS2A01G265400
TraesCS2A01G265500
TraesCS2A01G265900
TraesCS2A01G266100
TraesCS2A01G266400
TraesCS2A01G266600
TraesCS2A01G267000
TraesCS2A01G267700
TraesCS2A01G267800
TraesCS2A01G268000
TraesCS2A01G268900
TraesCS2A01G269600
TraesCS2A01G271000
TraesCS2A01G271100
TraesCS2A01G271200
TraesCS2A01G271400
TraesCS2A01G273200
TraesCS2A01G273400
TraesCS2A01G273500
TraesCS2A01G274300
TraesCS2A01G274600
TraesCS2A01G274700
TraesCS2A01G275500
TraesCS2A01G277300
TraesCS2A01G277400
TraesCS2A01G277500
TraesCS2A01G278100
TraesCS2A01G279000
TraesCS2A01G279400
TraesCS2A01G279500
TraesCS2A01G280200
TraesCS2A01G280300
TraesCS2A01G280600
TraesCS2A01G281300
TraesCS2A01G281800
TraesCS2A01G282500
TraesCS2A01G284000
TraesCS2A01G285800
TraesCS2A01G286100
TraesCS2A01G286300
TraesCS2A01G286400
TraesCS2A01G287000
TraesCS2A01G287700
TraesCS2A01G288500
TraesCS2A01G288800
TraesCS2A01G289000
TraesCS2A01G289900
TraesCS2A01G290700
TraesCS2A01G292200
TraesCS2A01G293000
TraesCS2A01G293100
TraesCS2A01G294300
TraesCS2A01G295500
TraesCS2A01G296200
TraesCS2A01G296300
TraesCS2A01G297800
TraesCS2A01G298700
TraesCS2A01G298800
TraesCS2A01G298900
TraesCS2A01G299700
TraesCS2A01G300000
TraesCS2A01G300400
TraesCS2A01G301200
TraesCS2A01G301600
TraesCS2A01G301700
TraesCS2A01G301800
TraesCS2A01G302600
TraesCS2A01G303000
TraesCS2A01G304500
TraesCS2A01G305100
TraesCS2A01G306900
TraesCS2A01G307800
TraesCS2A01G308500
TraesCS2A01G309000
TraesCS2A01G309800
TraesCS2A01G310000
TraesCS2A01G310600
TraesCS2A01G310800
TraesCS2A01G311300
TraesCS2A01G312400
TraesCS2A01G312500
TraesCS2A01G313600
TraesCS2A01G313800
TraesCS2A01G314000
TraesCS2A01G314100
TraesCS2A01G315200
TraesCS2A01G315500
TraesCS2A01G315700
TraesCS2A01G316200
TraesCS2A01G317500
TraesCS2A01G317600
TraesCS2A01G318900
TraesCS2A01G319300
TraesCS2A01G319600
TraesCS2A01G321800
TraesCS2A01G322000
TraesCS2A01G322100
TraesCS2A01G322200
TraesCS2A01G323600
TraesCS2A01G324300
TraesCS2A01G324600
TraesCS2A01G325000
TraesCS2A01G325300
TraesCS2A01G326000
TraesCS2A01G326300
TraesCS2A01G327400
TraesCS2A01G328100
TraesCS2A01G328500
TraesCS2A01G329100
TraesCS2A01G329600
TraesCS2A01G330700
TraesCS2A01G332500
TraesCS2A01G333900
TraesCS2A01G335500
TraesCS2A01G335900
TraesCS2A01G337500
TraesCS2A01G338000
TraesCS2A01G338700
TraesCS2A01G339600
TraesCS2A01G339700
TraesCS2A01G339800
TraesCS2A01G340100
TraesCS2A01G341000
TraesCS2A01G341100
TraesCS2A01G341200
TraesCS2A01G342000
TraesCS2A01G342900
TraesCS2A01G343700
TraesCS2A01G344400
TraesCS2A01G344700
TraesCS2A01G345100
TraesCS2A01G346800
TraesCS2A01G347100
TraesCS2A01G347500
TraesCS2A01G347700
TraesCS2A01G348800
TraesCS2A01G349400
TraesCS2A01G350200
TraesCS2A01G351100
TraesCS2A01G352100
TraesCS2A01G352200
TraesCS2A01G353700
TraesCS2A01G354600
TraesCS2A01G355000
TraesCS2A01G355800
TraesCS2A01G356100
TraesCS2A01G356700
TraesCS2A01G357300
TraesCS2A01G358400
TraesCS2A01G358600
TraesCS2A01G358800
TraesCS2A01G359200
TraesCS2A01G359600
TraesCS2A01G360100
TraesCS2A01G360400
TraesCS2A01G360700
TraesCS2A01G361000
TraesCS2A01G361100
TraesCS2A01G361300
TraesCS2A01G361500
TraesCS2A01G361800
TraesCS2A01G362000
TraesCS2A01G362500
TraesCS2A01G362800
TraesCS2A01G362900
TraesCS2A01G364600
TraesCS2A01G365300
TraesCS2A01G365500
TraesCS2A01G365700
TraesCS2A01G365900
TraesCS2A01G366000
TraesCS2A01G366400
TraesCS2A01G366600
TraesCS2A01G366800
TraesCS2A01G368800
TraesCS2A01G369300
TraesCS2A01G369500
TraesCS2A01G369600
TraesCS2A01G370500
TraesCS2A01G370600
TraesCS2A01G371300
TraesCS2A01G374900
TraesCS2A01G375500
TraesCS2A01G375600
TraesCS2A01G376100
TraesCS2A01G376900
TraesCS2A01G377100
TraesCS2A01G377400
TraesCS2A01G377500
TraesCS2A01G378000
TraesCS2A01G379100
TraesCS2A01G382100
TraesCS2A01G382300
TraesCS2A01G382600
TraesCS2A01G382800
TraesCS2A01G383400
TraesCS2A01G384000
TraesCS2A01G384500
TraesCS2A01G387600
TraesCS2A01G388600
TraesCS2A01G389700
TraesCS2A01G390400
TraesCS2A01G391800
TraesCS2A01G392000
TraesCS2A01G392300
TraesCS2A01G393100
TraesCS2A01G393300
TraesCS2A01G393600
TraesCS2A01G394000
TraesCS2A01G394200
TraesCS2A01G395500
TraesCS2A01G395600
TraesCS2A01G395700
TraesCS2A01G396700
TraesCS2A01G397500
TraesCS2A01G397700
TraesCS2A01G398200
TraesCS2A01G398400
TraesCS2A01G399800
TraesCS2A01G400700
TraesCS2A01G400800
TraesCS2A01G401100
TraesCS2A01G401900
TraesCS2A01G402100
TraesCS2A01G402900
TraesCS2A01G403500
TraesCS2A01G403900
TraesCS2A01G405200
TraesCS2A01G405400
TraesCS2A01G405500
TraesCS2A01G407800
TraesCS2A01G408300
TraesCS2A01G408500
TraesCS2A01G408700
TraesCS2A01G409600
TraesCS2A01G409900
TraesCS2A01G410600
TraesCS2A01G411100
TraesCS2A01G411300
TraesCS2A01G411400
TraesCS2A01G411500
TraesCS2A01G411600
TraesCS2A01G411900
TraesCS2A01G412300
TraesCS2A01G412400
TraesCS2A01G414900
TraesCS2A01G415000
TraesCS2A01G416200
TraesCS2A01G416900
TraesCS2A01G417000
TraesCS2A01G417400
TraesCS2A01G418000
TraesCS2A01G418500
TraesCS2A01G418600
TraesCS2A01G418700
TraesCS2A01G418800
TraesCS2A01G418900
TraesCS2A01G419400
TraesCS2A01G420300
TraesCS2A01G420400
TraesCS2A01G420500
TraesCS2A01G420700
TraesCS2A01G421600
TraesCS2A01G421700
TraesCS2A01G421800
TraesCS2A01G421900
TraesCS2A01G422000
TraesCS2A01G423100
TraesCS2A01G423200
TraesCS2A01G423800
TraesCS2A01G425100
TraesCS2A01G425300
TraesCS2A01G425700
TraesCS2A01G426300
TraesCS2A01G426800
TraesCS2A01G427500
TraesCS2A01G427800
TraesCS2A01G428700
TraesCS2A01G428800
TraesCS2A01G428900
TraesCS2A01G429500
TraesCS2A01G429700
TraesCS2A01G429900
TraesCS2A01G430000
TraesCS2A01G430600
TraesCS2A01G432200
TraesCS2A01G432300
TraesCS2A01G432400
TraesCS2A01G432500
TraesCS2A01G435200
TraesCS2A01G435300
TraesCS2A01G435600
TraesCS2A01G437800
TraesCS2A01G438400
TraesCS2A01G438600
TraesCS2A01G438700
TraesCS2A01G439100
TraesCS2A01G439300
TraesCS2A01G440000
TraesCS2A01G440200
TraesCS2A01G440900
TraesCS2A01G441000
TraesCS2A01G441700
TraesCS2A01G442500
TraesCS2A01G444200
TraesCS2A01G444500
TraesCS2A01G444900
TraesCS2A01G445200
TraesCS2A01G445700
TraesCS2A01G445800
TraesCS2A01G446400
TraesCS2A01G446800
TraesCS2A01G447200
TraesCS2A01G447400
TraesCS2A01G447500
TraesCS2A01G448900
TraesCS2A01G449900
TraesCS2A01G450700
TraesCS2A01G450900
TraesCS2A01G451000
TraesCS2A01G452000
TraesCS2A01G452200
TraesCS2A01G452900
TraesCS2A01G453100
TraesCS2A01G453700
TraesCS2A01G453800
TraesCS2A01G454300
TraesCS2A01G456400
TraesCS2A01G456500
TraesCS2A01G456800
TraesCS2A01G457000
TraesCS2A01G457800
TraesCS2A01G458200
TraesCS2A01G458300
TraesCS2A01G458400
TraesCS2A01G458600
TraesCS2A01G459000
TraesCS2A01G459200
TraesCS2A01G460500
TraesCS2A01G461000
TraesCS2A01G461400
TraesCS2A01G461500
TraesCS2A01G462000
TraesCS2A01G463700
TraesCS2A01G464500
TraesCS2A01G464700
TraesCS2A01G465100
TraesCS2A01G465200
TraesCS2A01G465900
TraesCS2A01G466000
TraesCS2A01G466100
TraesCS2A01G466400
TraesCS2A01G466900
TraesCS2A01G467200
TraesCS2A01G468100
TraesCS2A01G469500
TraesCS2A01G469900
TraesCS2A01G470200
TraesCS2A01G470300
TraesCS2A01G470700
TraesCS2A01G470800
TraesCS2A01G470900
TraesCS2A01G471100
TraesCS2A01G471800
TraesCS2A01G471900
TraesCS2A01G472200
TraesCS2A01G473800
TraesCS2A01G474700
TraesCS2A01G475000
TraesCS2A01G475100
TraesCS2A01G475400
TraesCS2A01G475500
TraesCS2A01G477100
TraesCS2A01G477200
TraesCS2A01G477300
TraesCS2A01G477600
TraesCS2A01G477800
TraesCS2A01G478200
TraesCS2A01G480600
TraesCS2A01G480800
TraesCS2A01G481400
TraesCS2A01G481600
TraesCS2A01G481800
TraesCS2A01G482000
TraesCS2A01G482100
TraesCS2A01G482500
TraesCS2A01G482900
TraesCS2A01G483200
TraesCS2A01G483300
TraesCS2A01G483600
TraesCS2A01G483800
TraesCS2A01G484400
TraesCS2A01G485300
TraesCS2A01G485600
TraesCS2A01G486000
TraesCS2A01G486300
TraesCS2A01G486700
TraesCS2A01G486800
TraesCS2A01G489900
TraesCS2A01G490000
TraesCS2A01G490600
TraesCS2A01G490700
TraesCS2A01G490800
TraesCS2A01G490900
TraesCS2A01G491100
TraesCS2A01G491500
TraesCS2A01G491900
TraesCS2A01G493000
TraesCS2A01G493100
TraesCS2A01G493900
TraesCS2A01G494000
TraesCS2A01G494200
TraesCS2A01G494500
TraesCS2A01G494800
TraesCS2A01G495200
TraesCS2A01G495800
TraesCS2A01G496500
TraesCS2A01G496600
TraesCS2A01G500100
TraesCS2A01G500800
TraesCS2A01G502500
TraesCS2A01G502700
TraesCS2A01G503000
TraesCS2A01G503500
TraesCS2A01G504000
TraesCS2A01G504500
TraesCS2A01G505100
TraesCS2A01G505300
TraesCS2A01G505400
TraesCS2A01G505700
TraesCS2A01G506300
TraesCS2A01G506600
TraesCS2A01G506700
TraesCS2A01G507100
TraesCS2A01G507600
TraesCS2A01G508000
TraesCS2A01G508100
TraesCS2A01G508400
TraesCS2A01G508900
TraesCS2A01G509100
TraesCS2A01G509200
TraesCS2A01G509400
TraesCS2A01G509500
TraesCS2A01G509600
TraesCS2A01G509900
TraesCS2A01G510100
TraesCS2A01G510500
TraesCS2A01G511800
TraesCS2A01G512200
TraesCS2A01G512600
TraesCS2A01G512800
TraesCS2A01G512900
TraesCS2A01G513100
TraesCS2A01G513300
TraesCS2A01G513800
TraesCS2A01G515200
TraesCS2A01G515300
TraesCS2A01G515400
TraesCS2A01G515800
TraesCS2A01G515900
TraesCS2A01G516400
TraesCS2A01G516600
TraesCS2A01G517400
TraesCS2A01G518800
TraesCS2A01G519000
TraesCS2A01G519100
TraesCS2A01G519200
TraesCS2A01G520000
TraesCS2A01G520100
TraesCS2A01G520600
TraesCS2A01G521200
TraesCS2A01G521900
TraesCS2A01G522300
TraesCS2A01G522500
TraesCS2A01G522600
TraesCS2A01G522700
TraesCS2A01G522900
TraesCS2A01G524300
TraesCS2A01G524600
TraesCS2A01G524900
TraesCS2A01G525100
TraesCS2A01G525600
TraesCS2A01G525700
TraesCS2A01G525800
TraesCS2A01G526200
TraesCS2A01G527300
TraesCS2A01G527700
TraesCS2A01G527900
TraesCS2A01G528000
TraesCS2A01G528100
TraesCS2A01G528300
TraesCS2A01G529100
TraesCS2A01G529200
TraesCS2A01G529300
TraesCS2A01G529400
TraesCS2A01G529500
TraesCS2A01G529600
TraesCS2A01G529700
TraesCS2A01G529800
TraesCS2A01G530500
TraesCS2A01G530600
TraesCS2A01G531000
TraesCS2A01G531600
TraesCS2A01G531700
TraesCS2A01G531900
TraesCS2A01G532000
TraesCS2A01G532100
TraesCS2A01G532200
TraesCS2A01G532500
TraesCS2A01G533500
TraesCS2A01G533600
TraesCS2A01G534300
TraesCS2A01G534600
TraesCS2A01G534700
TraesCS2A01G535200
TraesCS2A01G535400
TraesCS2A01G535500
TraesCS2A01G535600
TraesCS2A01G535700
TraesCS2A01G535800
TraesCS2A01G536300
TraesCS2A01G536800
TraesCS2A01G537000
TraesCS2A01G537600
TraesCS2A01G537700
TraesCS2A01G537800
TraesCS2A01G538000
TraesCS2A01G538100
TraesCS2A01G539200
TraesCS2A01G540300
TraesCS2A01G540500
TraesCS2A01G540700
TraesCS2A01G540800
TraesCS2A01G541000
TraesCS2A01G541100
TraesCS2A01G541200
TraesCS2A01G541600
TraesCS2A01G543100
TraesCS2A01G543200
TraesCS2A01G543400
TraesCS2A01G543700
TraesCS2A01G543800
TraesCS2A01G544200
TraesCS2A01G545800
TraesCS2A01G546100
TraesCS2A01G546200
TraesCS2A01G546800
TraesCS2A01G547100
TraesCS2A01G547200
TraesCS2A01G547500
TraesCS2A01G548800
TraesCS2A01G549700
TraesCS2A01G550000
TraesCS2A01G550100
TraesCS2A01G550400
TraesCS2A01G550600
TraesCS2A01G550700
TraesCS2A01G550800
TraesCS2A01G551700
TraesCS2A01G552200
TraesCS2A01G552600
TraesCS2A01G552800
TraesCS2A01G553100
TraesCS2A01G553700
TraesCS2A01G553800
TraesCS2A01G554000
TraesCS2A01G554400
TraesCS2A01G554500
TraesCS2A01G554800
TraesCS2A01G555300
TraesCS2A01G555700
TraesCS2A01G555900
TraesCS2A01G556000
TraesCS2A01G556600
TraesCS2A01G556800
TraesCS2A01G557200
TraesCS2A01G557300
TraesCS2A01G557800
TraesCS2A01G558400
TraesCS2A01G558600
TraesCS2A01G558900
TraesCS2A01G559000
TraesCS2A01G560200
TraesCS2A01G560600
TraesCS2A01G560900
TraesCS2A01G561000
TraesCS2A01G561400
TraesCS2A01G561500
TraesCS2A01G561800
TraesCS2A01G561900
TraesCS2A01G562200
TraesCS2A01G562300
TraesCS2A01G562700
TraesCS2A01G563700
TraesCS2A01G563900
TraesCS2A01G564100
TraesCS2A01G564300
TraesCS2A01G564400
TraesCS2A01G564700
TraesCS2A01G564900
TraesCS2A01G565100
TraesCS2A01G565300
TraesCS2A01G565900
TraesCS2A01G566100
TraesCS2A01G566300
TraesCS2A01G566400
TraesCS2A01G566800
TraesCS2A01G567000
TraesCS2A01G568000
TraesCS2A01G568500
TraesCS2A01G568800
TraesCS2A01G569100
TraesCS2A01G569200
TraesCS2A01G569300
TraesCS2A01G569600
TraesCS2A01G569700
TraesCS2A01G569800
TraesCS2A01G570000
TraesCS2A01G571000
TraesCS2A01G571500
TraesCS2A01G571600
TraesCS2A01G571800
TraesCS2A01G572000
TraesCS2A01G572100
TraesCS2A01G572400
TraesCS2A01G573000
TraesCS2A01G573700
TraesCS2A01G573800
TraesCS2A01G574100
TraesCS2A01G574300
TraesCS2A01G574500
TraesCS2A01G574900
TraesCS2A01G575000
TraesCS2A01G575100
TraesCS2A01G575200
TraesCS2A01G575800
TraesCS2A01G576700
TraesCS2A01G576800
TraesCS2A01G577200
TraesCS2A01G577900
TraesCS2A01G578100
TraesCS2A01G578700
TraesCS2A01G578800
TraesCS2A01G579100
TraesCS2A01G579300
TraesCS2A01G579400
TraesCS2A01G579500
TraesCS2A01G579600
TraesCS2A01G579800
TraesCS2A01G579900
TraesCS2A01G580900
TraesCS2A01G581000
TraesCS2A01G581100
TraesCS2A01G581200
TraesCS2A01G581700
TraesCS2A01G582200
TraesCS2A01G582400
TraesCS2A01G582600
TraesCS2A01G582700
TraesCS2A01G582900
TraesCS2A01G583500
TraesCS2A01G584000
TraesCS2A01G584300
TraesCS2A01G584800
TraesCS2A01G585000
TraesCS2A01G585100
TraesCS2A01G585300
TraesCS2A01G585900
TraesCS2A01G588400
TraesCS2A01G588500
TraesCS2A01G588600
TraesCS2A01G588700
TraesCS2A01G588900
TraesCS2A01G589000
TraesCS2A01G589100
TraesCS2A01G589500
TraesCS2A01G589600
TraesCS2A01G589700
TraesCS2A01G590500
TraesCS2A01G590900
TraesCS2A01G591100
TraesCS2A01G591800
TraesCS2A01G592100
TraesCS2A01G592200
TraesCS2A01G592300
TraesCS2A01G592400
TraesCS2A01G592500
TraesCS2A01G592800
TraesCS2A01G593400
TraesCS2A01G593500
TraesCS2A01G593800
