# Supplementary material for: Cytological and molecular characterizations of a novel 2A nullisomic line derived from a widely-grown wheat cultivar Zhoumai 18 conferring male sterility
Source: PeerJ. 2020 Oct 30;8:e10275. doi: 10.7717/peerj.10275 (PMC7605228; doi:10.7717/peerj.10275)
Supplement: Table S9 [file peerj-08-10275-s010.xls]

## Sheet: Sheet1
The average FPKM of the 188 genes.
#ID	Root	Stem	Leaf	Tillering	Spike Ⅰ	Spike Ⅱ	Spike Ⅲ	Spike Ⅳ	Spike Ⅴ	Pistil	Stamen	Grain-filling
TraesCS2A01G001800	0	0	0	0	0	0	0	0	0	0	120.69	0
TraesCS2A01G001900	0	0	0	0	0	0	0	0	0	0	15.6719	0
TraesCS2A01G002000	0	0	0	0.0335847	0	0	0	0.109465	0	0.0195143	184.795	0.458129
TraesCS2A01G004500	0	0	0	0	0	0	0	0	0	0	19.93	0
TraesCS2A01G011700	0	0	0	0	0	0	0	0	0	0.0434007	5.72858	0
TraesCS2A01G035300	0	0	0	0	0	0	0	0	0	0	8.03091	0.191997
TraesCS2A01G035900	0	0.169847	0	0.272612	0	0	0	0	4.04469	0.0905947	8.47908	0.640023
TraesCS2A01G037000	0	0	0	0	0	0	0	0	0	0	4.06055	0
TraesCS2A01G043200	0	0	0	0	0	0	0	0	0	0	10.5874	0
TraesCS2A01G043400	0	0	0	0	0	0	0	0	0	0	16.4526	0
TraesCS2A01G045000	3.58707	1.29997	2.21139	1.23689	1.07022	1.17978	0.875376	0.638209	0.443696	0.944205	93.7352	3.65401
TraesCS2A01G048900	0	0	0	0	0	0	0	0	0	0	114.301	0
TraesCS2A01G049000	0	0	0	0	0	0	0	0	0	0	56.0142	0
TraesCS2A01G051800	0	0	0	0	0	0	0	0	0.110938	0	10.524	0
TraesCS2A01G052000	0	0	0	0	0	0	0	0	0	0	5.31375	0
TraesCS2A01G058000	0	0	0	0	0	0	0	0	0	0	14.0898	0.022259
TraesCS2A01G076100	5.498	0	10.469	0.20408	0	0.011432	0	0	0	0.0924167	45.2124	5.20438
TraesCS2A01G077100	0	0	0	0	0	0	0	0	0.127928	0.003976	6.21511	0.0151333
TraesCS2A01G087400	0	0	0	0	0	0	0	0	0	0	3.7364	0
TraesCS2A01G088600	0	0.0128191	0	0	0	0	0	0	0.100241	0.00975667	41.9628	0.158935
TraesCS2A01G091000	0.0839161	0	0	0.0511077	0.0807685	0.599682	0.637891	0.822225	0.624704	0.1451	10.4693	4.13898
TraesCS2A01G092800	0	0	0	0	0	0	0	0	0	0.00580133	29.5698	0
TraesCS2A01G098000	0	0	0	0.0169392	0	0	0	0	0.114789	0.0112243	9.81918	1.42206
TraesCS2A01G102000	0	0	1.29227	0.0568307	0.0649195	0	0.263849	0	0.298416	0.122596	14.2026	7.02419
TraesCS2A01G103600	0	0	0	0	0	0	0	0	0	0.285139	46.732	0.0944213
TraesCS2A01G119600	0	0	0.919716	0.0390429	0	0	0	0	0.156804	0.0357457	6.97234	0.624609
TraesCS2A01G120800	0	0	0	0	0.429565	0	0.599774	0.122291	0.32718	0	15.0059	0
TraesCS2A01G122400	0	0	1.95456	0	0	0	0	0	0.299804	0	12.6246	0
TraesCS2A01G122500	0	0	0	0	0	0	0	0	0	0	4.67851	0
TraesCS2A01G122600	0.657897	0	0	0	0	0	0	0	0	0	11.0484	0
TraesCS2A01G123800	0.0448904	4.80489	2.64592	2.08502	0.704802	4.23248	1.0559	1.6758	1.89294	7.20625	69.3519	1.31556
TraesCS2A01G125400	0.34872	0.0081255	1.08542	0.0722187	0	0.00863457	0	0.0776185	0.338813	0.243459	5.96803	0.162987
TraesCS2A01G133300	0	0	0	0	0	0	0	0	0	0	33.4899	0
TraesCS2A01G140900	0	0	0	0	0	0	0	0	0	0	10.9219	0
TraesCS2A01G141600	3.68935	3.27943	1.78059	4.04032	0.420277	1.53705	0.471674	1.59627	5.79105	5.5277	20.1033	1.04497
TraesCS2A01G156900	0	0.0524493	0	0.396346	0	0	0	0	0	0.153194	17.6425	0.245119
TraesCS2A01G157500	1.58045	0	0	0	0	0	0	0	0	0.00559833	4.71095	0
TraesCS2A01G159600	4.31002	0	0	0	0.339372	0	0.278942	0.246475	0.0997825	0	15.472	0
TraesCS2A01G161000	0.892173	0.517725	0	1.82437	0.0220839	0.644466	0.350598	0.337117	0.586016	1.29249	11.7171	4.39812
TraesCS2A01G163300	0.208395	1.53308	2.83802	0.752986	2.57975	2.06385	2.70979	4.39243	2.13973	4.78186	30.757	0.196103
TraesCS2A01G173200	0	0	0	0.0259573	0	0	0	0	5.42933	1.71533	40.9097	1.69435
TraesCS2A01G175100	0.0302437	0	0	0.0171467	0.360535	0.0432692	0.0900945	0.287647	2.54519	1.06895	45.862	10.7855
TraesCS2A01G176400	7.79273	0.114775	11.5452	0.0511794	0.0441121	0.121791	0.167528	0.294902	1.39359	0.182131	18.8916	0.166855
TraesCS2A01G181200	0.36066	0.15378	0	0.746857	0	0.0327396	0	0.168853	2.63799	0.539432	9.34404	1.87034
TraesCS2A01G182100	0	0	0	0	0	0	0	0	0	0.017172	27.852	0
TraesCS2A01G185400	0	0	0	0	0	0	0	0	0	0.0156753	4.88497	0.0141033
TraesCS2A01G187600	5.64547	0.214111	4.24917	0.770477	0.181632	0.208498	0.275816	0.457175	0.480137	0.230206	10.7242	0.891466
TraesCS2A01G190200	0	0.0498787	0	1.559	0.0631635	0.125443	0.255387	0.0909165	0.582654	0.146053	11.8692	5.87878
TraesCS2A01G191200	0	0	0	0	0	0	0	0	0	0	9.78174	0.0337563
TraesCS2A01G191300	0	0	0	0	0	0	0	0	0.900625	0.00999367	42.2398	0.128021
TraesCS2A01G193800	0.826205	4.34654	15.6177	4.08769	4.13858	3.66486	3.71054	3.23708	4.01655	4.03166	23.671	2.29592
TraesCS2A01G194300	0	0	0	0	0	0	0	0	0	0	4.07518	0
TraesCS2A01G201800	0	0	0	0.0692124	0	0	0	0	0	0.018362	22.9463	1.80596
TraesCS2A01G202100	0.397546	0.131561	0	37.9703	0.107176	0.133834	0.285049	0	18.5874	20.2694	450.306	42.0704
TraesCS2A01G203200	0	0	0	0	0	0	0.0838174	0	1.56533	0.0291457	18.8502	0.0757067
TraesCS2A01G209600	0	0	0	0	0	0	0	0	0	0	28.518	0
TraesCS2A01G212500	0	0	0	0	0.0332127	0	0.0213941	0	0	0.003658	291.493	0
TraesCS2A01G215300	0	0.0993821	2.37819	0	0	0.0232487	0	0	0.0363265	0.210159	32.1345	0.462444
TraesCS2A01G219400	1.85648	0.285789	2.30351	0.216749	0.224511	0.309091	0.345485	0.270578	0.386771	2.35463	97.3896	0
TraesCS2A01G220600	1.40558	1.64049	3.31147	3.26498	2.53894	2.42751	1.2085	2.04982	0.28852	1.14581	14.8887	1.23699
TraesCS2A01G222200	13.2068	0.0608503	0	0.281754	0.25419	0.19241	0.192813	0.219304	1.45589	0.163183	13.2475	0.0994227
TraesCS2A01G227300	0	0	0	0	0	0	0	0	0	0	40.5009	0
TraesCS2A01G230100	4.02242	0.0676416	0.104528	0.627778	0.033345	0.0783555	0.0519805	0.144343	1.11479	0.274519	6.92901	0.27239
TraesCS2A01G232900	3.9168	0.0596185	1.86938	0.370299	0.0316185	0.0405596	0.0866803	0.205333	0.349871	0.364917	9.63341	5.17524
TraesCS2A01G240300	0	0	0	0	0	0	0	0	0	0.005689	19.2671	0.007501
TraesCS2A01G254500	0	0	0	0	0	0	0	0	0	0	10.1051	0.0101183
TraesCS2A01G256900	0.123558	0.673096	0	0.78887	0.344072	0.865307	0.42227	0.17216	0.146213	0.295714	54.685	1.57683
TraesCS2A01G261400	0	0	0	0	0	0	0	0	0	0	23.6461	0
TraesCS2A01G261500	0	0	0	0	0	0	0	0	0	0	165.897	0.423329
TraesCS2A01G263900	0	0	0	0	0	0	0	0	0	0	25.7259	0
TraesCS2A01G269200	0	0.103135	0	0.161013	0	0.0530673	0.3707	0.0965895	0.097435	0.056029	10.2694	0.0218817
TraesCS2A01G269500	0	0	0	0	0	0	0	0	0	0.025405	217.706	0
TraesCS2A01G272900	0	0	0	0	0	0	0	0.0398913	36.0736	0.294567	442.6	0
TraesCS2A01G273800	0	0.024216	0	0.111904	0.0550728	0.0124994	0	0.0426313	3.51186	0.057921	10.698	0.011298
TraesCS2A01G274300	0	0	0	0	0	0	0	0	0.0758435	0.0101437	3.73778	0
TraesCS2A01G275000	0.632215	1.00969	0.934559	1.04533	1.54166	1.22802	1.90563	2.02393	2.07543	1.83588	20.3957	1.16756
TraesCS2A01G277100	6.24262	0.03657	4.37822	0	0.0336	0.102603	1.10912	1.38803	1.54863	50.5092	50.3845	3.16897
TraesCS2A01G278100	0	0.0241439	0	0	0.0946668	0.01258	0.0796215	0.0392058	0.155619	0.72646	5.48795	0.211398
TraesCS2A01G279600	0.0629158	1.78155	1.95735	1.04687	0.937104	1.21321	1.33485	1.43925	0.98986	0.222678	108.128	0.027661
TraesCS2A01G286700	1.29625	0	0	0.0489873	0.480824	0	1.10204	0.668497	0	0.107402	5.131	0.0641287
TraesCS2A01G288400	0	0	0	0.044103	0.217114	0.111221	0.136305	0	0	0.228982	300.286	0
TraesCS2A01G290100	10.3492	21.5628	7.69329	18.9132	2.92306	13.5548	1.9407	5.44895	15.5184	6.21971	42.9611	3.56057
TraesCS2A01G290800	0.108611	0	0.0480874	0	0	0	0	0	11.5642	0.00838333	8.70847	1.76624
TraesCS2A01G295300	0	0	0	0	0	0	0	0	0	0	11.5154	0
TraesCS2A01G295400	0.813674	10.8768	5.49927	29.8688	0.62017	1.11315	0.241505	0.887231	3.37874	18.3408	118.616	8.41806
TraesCS2A01G297200	0	0.112585	0	0	0.407941	0.104785	0.277357	0.571755	1.26115	0.00124267	11.7476	0.326357
TraesCS2A01G311000	0.209062	2.88391	1.52606e-09	0.270848	0.548331	3.01323	0.875293	0.562518	0.986093	0.597466	47.7132	0.439966
TraesCS2A01G315300	0	0	0	0	0	0.0118943	0	0	0.361518	0.022312	132.043	0.124762
TraesCS2A01G315600	0.749936	0	4.44947	8.61443	0	0.0220352	0	0	0	0.009593	76.8313	9.59435
TraesCS2A01G315700	0	0	0	0.729549	0	0	0	0	0	0.0128273	24.1979	0.0558567
TraesCS2A01G316000	0	0	0	0	0	0	0	0	0.0913895	0.168497	6.47583	0
TraesCS2A01G316600	0	0	0	0	0	0	0	0	15.2597	0.0936093	81.3095	0.03584
TraesCS2A01G316900	1.97012	4.16185	1.83918	5.12258	1.80701	3.81874	1.80678	1.81833	1.60488	3.57415	92.4919	1.92847
TraesCS2A01G317400	0	0.0270429	0	0.181618	0.11718	0.0826815	0.089695	0.09411	40.1298	0.354949	10.7324	0.0498877
TraesCS2A01G318800	2.53419	0.0336233	0	0.34595	0	0	0.451755	0	0.378223	0	10.4043	4.63192
TraesCS2A01G321300	0	0	0	0	0	0	0	0	0.877171	0.133657	139.286	0
TraesCS2A01G327200	0.136069	0.0640541	0	0.0701687	0	0.00979714	0	0.0189534	0.0447726	0.0305527	98.5348	0.007748
TraesCS2A01G327900	21.5373	5.1315	15.631	4.3385	5.49273	11.8662	3.34613	2.35811	1.36702	3.91719	40.1311	6.14875
TraesCS2A01G335800	0	0	0	0.0309483	0	0	0	0	0	1.31243	7.05861	0.0545667
TraesCS2A01G340700	8.68288	0.0982046	0	1.69501	0.983805	1.19363	1.12778	1.65982	2.73535	2.79151	18.8786	0.307823
TraesCS2A01G344000	0	0	0	0	0	0	0	0	0	0.00904767	7.29278	0.366736
TraesCS2A01G344200	0	0	0	0	0	0	0	0	0	0.00379733	171.732	0
TraesCS2A01G349100	5.38868	0.341675	1.22963	2.25003	0.803083	0.20478	1.33796	1.28829	5.95282	7.77674	26.1961	1.67217
TraesCS2A01G353000	0	0.133063	0	0.0612101	0.0587689	0.133744	0.0099461	0.0259068	0.0536713	0.119503	5.83008	0.027794
TraesCS2A01G354400	0	0	0	0.017795	0.0507951	0.00846247	0	0.0365984	0.130518	1.00226	9.40515	0.17757
TraesCS2A01G354700	0	0	0	0	0	0	0	0	0	0	20.97	0
TraesCS2A01G363200	9.60576	0	0	0	0	0	0	0	1.55058	0	13.2598	0
TraesCS2A01G363900	0	0	0	0	0	0	0	0	0.617048	0.0240173	49.2445	0
TraesCS2A01G364100	2.5561	1.21285	3.5907	1.96675	1.36564	3.56908	2.09361	2.12799	1.11895	1.66383	16.0062	6.54626
TraesCS2A01G367700	0	0	4.42628	0	0	0	0.291922	0	0.155544	0.009761	19.907	8.82307
TraesCS2A01G370800	0	0	0	0	0	0	0	0	0	0	95.4775	0
TraesCS2A01G371200	0	0.0331021	0	0.0308639	0	0	0	0	0	0.0200637	8.50681	0.154081
TraesCS2A01G374200	0	0.125695	6.78319	0	0	0.0833803	0.140611	0	291.658	0.0274743	31.5222	0.099807
TraesCS2A01G376700	0	0	0	0.00752977	0.0151542	0	0	0	0.11326	0.186983	14.0679	0.00632067
TraesCS2A01G378200	1.3654	0.0677176	13.4911	3.55644	0	0	0	0.0643895	0	0.0370323	61.8731	0
TraesCS2A01G382900	0	0	0	0	0	0	0	0	0.0868923	0.0472673	7.98534	0.0149967
TraesCS2A01G385100	1.08836	0.0271746	0	0	0.183544	0.0162961	0.215508	0.0718879	0.224591	0.037257	55.4699	0.0143927
TraesCS2A01G385500	0	1.60245	0.0798716	0.791457	0.590402	0.730572	0.338827	0.373485	0.572721	0.15102	35.0071	0.177982
TraesCS2A01G386100	0.900075	0.0327984	2.02792	0.0139666	0	0.0115839	0.0561063	0.0583939	0.0598767	0.136759	4.69985	0.505431
TraesCS2A01G390000	0.990574	0.559466	1.4939	0.233414	1.76365	1.56103	1.60148	1.45344	6.44048	0.417615	160.333	0.277617
TraesCS2A01G392700	0	0	0	0.0631747	0	0	0	0	0	0.0751893	280.569	0.00753133
TraesCS2A01G396200	0	0.529229	5.75555	1.41824	0	1.48761	0.248733	0.51321	0.811536	1.97166	12.1183	2.00991
TraesCS2A01G399100	0	0	0	0	0	0	0	0	4.65377	0.205968	287.182	8.80642
TraesCS2A01G400400	0	0.0113961	0	0.0105274	0	0	0	0	0.656862	0.121669	310.09	0
TraesCS2A01G406200	0.457328	0	0	0.0390324	0	0	0.0364516	0	0.103731	0.542753	107.739	4.33122
TraesCS2A01G406300	0	2.01925	0	0.305068	0	0.3958	0	0.061936	0.983935	0.00707133	7.70004	0
TraesCS2A01G408900	0	0	0	0	0	0	0	0	0	0	25.5428	0
TraesCS2A01G410400	1.44269	0.121621	2.04464	2.22469	0.104292	0.110817	0.0827979	0.179929	0.25831	0.533541	7.62056	4.20547
TraesCS2A01G410700	0	0	0	0	0	0	0	0	0	0.016954	119.973	0
TraesCS2A01G412100	0	0	0	0	0	0	0	0	0	0.00425733	16.8529	0
TraesCS2A01G413200	0	0	0	0	0	0	0	0	0	0	13.3164	0
TraesCS2A01G413400	0	0	0	0	0	0	0	0	0	0.02184	81.6616	0
TraesCS2A01G414200	0	0	0	0	0	0	0	0	0	0	13.5238	1.44792
TraesCS2A01G414400	0	0	0	0	0	0	0	0	6.76093	0.30282	76.0399	0.80003
TraesCS2A01G417000	0	0	0	0	0.626846	0.0175316	0.150348	0.0975154	0.073937	0.179989	4.19883	0.129237
TraesCS2A01G417500	0	0.0612303	0	0.0521427	0	0.0615857	0	0	0.116955	0	16.3971	0.139049
TraesCS2A01G420700	2.25199	0.053009	0	1.02981	0	0	0.0462301	0	0.0975415	0.0382843	7.73191	0.0985917
TraesCS2A01G421400	3.97848	2.37344	10.8385	5.25102	1.41728	2.9165	1.65917	1.13275	1.45622	5.1534	37.4474	5.63606
TraesCS2A01G432400	0	0	0	1.35946	0	0.810377	0.863645	1.81069	2.78136	0.0408233	17.5387	2.23037
TraesCS2A01G434600	0.2332	0.501996	0.726261	0.318224	0.424098	0.401423	0.315016	0.454933	0.478182	2.60997	20.7814	3.82499
TraesCS2A01G436100	0.712604	4.6729	1.24749	4.72286	2.57203	4.0617	1.99814	1.71886	2.38112	2.97361	49.3642	2.13751
TraesCS2A01G436200	0	2.7855	0	7.49682	0.267855	0.547834	0.105759	0.482623	2.21084	0.229577	56.7666	2.3021
TraesCS2A01G440900	0	0	0	0	0	0	0	0	0	0	3.95673	0
TraesCS2A01G442500	0	0	0	0	0	0.0208358	0	0	3.69503	0.005577	11.4459	0
TraesCS2A01G442700	0	0.0488648	0	0	0.142933	0.0202336	0.055476	0.0184815	0.602276	0.191724	11.9432	0.014066
TraesCS2A01G444400	0	0	0	0	0	0	0	0	0.0317327	0	13.1755	0
TraesCS2A01G447800	9.56292	4.15565	15.1769	6.12728	2.38712	4.56062	4.58969	6.19104	6.56362	5.72963	71.855	6.40574
TraesCS2A01G452600	0	0	0	0	0	0	0	0	0	0.0142183	11.177	0
TraesCS2A01G458000	0	0.210993	0	0	0	0	0	0	0	0	21.2583	0
TraesCS2A01G458100	0.362545	0.137927	0	0	0.464124	0.128684	1.55161	1.66548	2.17697	0	46.4761	0
TraesCS2A01G464200	0	0	0	0.119508	0	0	0	0	0	0.0145313	124.999	0
TraesCS2A01G469000	0	0	0	0	0	0	0	0	0	0	28.1706	0
TraesCS2A01G471700	0	0	0	0	0	0	0	0	0.0345633	0.0247527	3.80551	0
TraesCS2A01G472900	0	0	0	0	0	0	0	0	0	0	3.85859	0
TraesCS2A01G474500	2.49509	0.064288	0	0.0292088	0	0	0.121923	0	0.797683	0.126783	4.90188	0.212287
TraesCS2A01G475200	0	0	0	0	0	0	0	0.145313	127.233	0.106492	56.4076	0
TraesCS2A01G488100	0	0	0	0	0	0	0.071058	0	5.69632	0	34.375	0
TraesCS2A01G499800	12.1936	0.0996737	0	1.00383	0.132875	0	0	0	0.239462	0.162854	19.6759	0.559174
TraesCS2A01G500000	0	0	0	0	0	0	0	0	0.098827	0.025664	7.26675	0
TraesCS2A01G505100	0	0	0	0	0	0	0	0	0.609059	0.235328	357.908	0
TraesCS2A01G507300	0	0	0	0	0	0	0	0	0.965475	0	65.0899	0.0754087
TraesCS2A01G511500	0	0	0	0	0	0	0	0	0	0	5.86122	0
TraesCS2A01G516300	1.85997	0.815843	0.726035	1.45916	0.639224	0.899426	0.400699	0.308617	1.19441	4.21674	89.4416	2.34703
TraesCS2A01G518500	0	0.042858	0	0	0	0.040978	0.129556	0.147657	27.4667	0	36.7306	0
TraesCS2A01G519300	0	0	0	0	0	0	0	0	0	0	27.3408	0
TraesCS2A01G521700	0	0	0	0	0	0	0	0	0	0.007116	9.52161	0.061033
TraesCS2A01G521800	0	0	0	0	0	0.00946307	0	0	0	0	5.10994	0
TraesCS2A01G521900	0	0	0	0	0	0	0	0	0	0.0120763	34.5129	0
TraesCS2A01G522300	0	0	0	0.04089	0	0	0	0	0.144709	0.0617413	9.19121	0
TraesCS2A01G524500	0	0.265475	0	0.0646947	0.44153	1.02785	0.233941	0.404118	0	0.146602	159.142	0.0227177
TraesCS2A01G527700	0	0	0.636347	2.45834	0	0.0218444	0	0	0.144017	4.2454	62.5505	0.0936457
TraesCS2A01G542800	0.434337	0	0	0	0	0	0	0	0.0494579	0	15.5069	0
TraesCS2A01G543500	0	0	0	0	0	0	0	0	0	0	126.83	0
TraesCS2A01G546700	0	0	0	0	0	0	0	0	0.142129	0.0224287	7.05277	0.00729367
TraesCS2A01G551300	0	0	0	0	0	0	0	0	0	1.0332	94.606	0
TraesCS2A01G553300	0	0	0	0	0.0195122	0	0	0	0	0.007833	15.2923	0
TraesCS2A01G558300	0	0.0499462	0	0.385303	0	0.0398426	0	0	0.104809	4.74451	9.674	0
TraesCS2A01G570900	0	0.469512	0	0.0101857	0	0.0856127	0.0370973	0.116466	0.0382591	0.0274187	5.61063	0.00463
TraesCS2A01G574500	0	0	0	0	0	0	0	0	0	0.047285	4.65405	0
TraesCS2A01G582800	0	0	0	0	0	0	0	0	0	0.0213423	80.9265	0
TraesCS2A01G584200	0	0	0	0	0	0	0	0	0	0	18.4952	0
TraesCS2A01G584800	0	0	0	0	0	0	0	0	0	0.00855233	52.3512	0
TraesCS2A01G585600	0	0	0	0.103848	0	0.0177448	0	0	0.300232	0.0762613	7.08129	0.013701
TraesCS2A01G590600	0.866657	32.6683	17.7709	81.6861	1.31251	1.61862	1.69739	13.7623	11.368	1.53797	58.3427	5.62753
TraesCS2A01G591600	0	0	0	0	0	0	0	0	0.0429968	0.0401033	25.1918	0.017088
TraesCS2A01G591900	0	0	0	0	0	0	0	0	0	0	43.8376	0
TraesCS2A01G593100	0	0	0	0	0	0	0	0.209595	309.287	0	20.7717	0
TraesCS2A01G593200	0.42268	0.056312	0	0.100132	0	0	0.0714356	0.179764	0.509966	0.121809	8.13193	0.672913

## Sheet: Sheet2
The chromosome 2A and stamen specifically expressed genes.
#ID	T4a_FPKM	T4b_FPKM	T4c_FPKM	T5a_FPKM	T5b_FPKM	T5c_FPKM	Swiss_Prot_annotation	NR_annotation
TraesCS2A01G001800	100.201	139.436	122.433	0	0	0	--	hypothetical protein TRIUR3_30059 [Triticum urartu]
TraesCS2A01G002000	136.45	201.546	216.387	0	0	0	--	hypothetical protein F775_27275 [Aegilops tauschii]
TraesCS2A01G035900	8.32698	9.28334	7.82693	0	0	0	Uncharacterized acetyltransferase At3g50280 GN=At3g50280 OS=Arabidopsis thaliana (Mouse-ear cress) PE=3 SV=1	Putative acetyltransferase [Aegilops tauschii]
TraesCS2A01G037000	4.59207	3.98274	3.60683	0	0	0	--	unnamed protein product [Triticum aestivum]
TraesCS2A01G043400	16.5844	15.6137	17.1597	0	0	0	Bidirectional sugar transporter SWEET6b GN=SWEET6B OS=Oryza sativa subsp. indica (Rice) PE=3 SV=1	Bidirectional sugar transporter SWEET6b [Triticum urartu]
TraesCS2A01G051800	11.7134	8.62933	11.2293	0	0	0	Bidirectional sugar transporter SWEET6b GN=SWEET6B OS=Oryza sativa subsp. indica (Rice) PE=3 SV=1	Protein RUPTURED POLLEN GRAIN 1 [Aegilops tauschii]
TraesCS2A01G077100	4.9883	5.48195	8.17507	0	0	0	UDP-glycosyltransferase 92A1 GN=UGT92A1 OS=Arabidopsis thaliana (Mouse-ear cress) PE=2 SV=1	Anthocyanidin 3-O-glucosyltransferase 5 [Aegilops tauschii]
TraesCS2A01G212500	277.123	315.235	282.12	0	0	0	--	hypothetical protein F775_00576 [Aegilops tauschii]
TraesCS2A01G261500	145.351	187.477	164.865	0	0	0	Probable ADP-ribosylation factor GTPase-activating protein AGD13 GN=AGD13 OS=Arabidopsis thaliana (Mouse-ear cress) PE=2 SV=1	putative ADP-ribosylation factor GTPase-activating protein AGD13 [Triticum urartu]
TraesCS2A01G274300	3.45886	4.55434	3.20013	0	0	0	Lysozyme (Precursor) OS=Hevea brasiliensis (Para rubber tree) PE=1 SV=2	predicted protein [Hordeum vulgare subsp. vulgare]
TraesCS2A01G278100	5.53836	5.84073	5.08476	0	0	0	Probable magnesium transporter NIPA4 GN=At1g71900 OS=Arabidopsis thaliana (Mouse-ear cress) PE=2 SV=1	hypothetical protein F775_13280 [Aegilops tauschii]
TraesCS2A01G315700	24.9885	30.6652	16.9399	0	0	0	Non-functional NADPH-dependent codeinone reductase 2 GN=COR2 OS=Papaver somniferum (Opium poppy) PE=1 SV=1	predicted protein [Hordeum vulgare subsp. vulgare]
TraesCS2A01G417000	4.30124	4.75872	3.53655	0	0	0	--	PREDICTED: uncharacterized protein LOC101757873 isoform X1 [Setaria italica]
TraesCS2A01G420700	7.86831	8.39983	6.92757	0	0	0	--	PREDICTED: cysteine-rich and transmembrane domain-containing protein A-like [Brachypodium distachyon]
TraesCS2A01G432400	17.4403	16.2406	18.9351	0	0	0	--	hypothetical protein TRIUR3_24544 [Triticum urartu]
TraesCS2A01G440900	3.68056	4.13555	4.05409	0	0	0	Trans-resveratrol di-O-methyltransferase GN=ROMT OS=Vitis vinifera (Grape) PE=1 SV=2	O-methyltransferase ZRP4 [Aegilops tauschii]
TraesCS2A01G442500	10.0964	9.49897	14.7424	0	0	0	Transcription factor TIP2 GN=P0706B05.43 OS=Oryza sativa subsp. japonica (Rice) PE=1 SV=1	Os04g0599300 [Oryza sativa Japonica Group]
TraesCS2A01G505100	324.341	397.613	351.771	0	0	0	--	hypothetical protein F775_22980 [Aegilops tauschii]
TraesCS2A01G521900	30.3294	37.586	35.6233	0	0	0	Pectinesterase 58 (Precursor) GN=K21P3.5 OS=Arabidopsis thaliana (Mouse-ear cress) PE=2 SV=1	PREDICTED: pectinesterase-like [Zea mays]
TraesCS2A01G522300	7.77551	8.92988	10.8682	0	0	0	SKP1-like protein 1B GN=MJC20.30 OS=Arabidopsis thaliana (Mouse-ear cress) PE=1 SV=1	SKP1-like protein 1B [Aegilops tauschii]
TraesCS2A01G527700	70.2359	39.4056	78.0102	0	0	0	Chalcone synthase 1 GN=CHS1 OS=Hordeum vulgare (Barley) PE=3 SV=1	Chalcone synthase 1 [Aegilops tauschii]
TraesCS2A01G574500	4.27048	4.72362	4.96804	0	0	0	SKP1-like protein 4 GN=ASK4 OS=Arabidopsis thaliana (Mouse-ear cress) PE=1 SV=1	SKP1-like protein 4 [Aegilops tauschii]
TraesCS2A01G584800	45.503	57.7116	53.8389	0	0	0	--	Endo-1,4-beta-xylanase C [Triticum urartu]
