# Supplementary material for: Cytological and molecular characterizations of a novel 2A nullisomic line derived from a widely-grown wheat cultivar Zhoumai 18 conferring male sterility
Source: PeerJ. 2020 Oct 30;8:e10275. doi: 10.7717/peerj.10275 (PMC7605228; doi:10.7717/peerj.10275)
Supplement: Table S10 [file peerj-08-10275-s011.xls]

## Sheet: Sheet1
Table S10. The DEGs (FC ≥ 4) between stamens of T and D plants.
#ID	T4a_FPKM	T4b_FPKM	T4c_FPKM	T5a_FPKM	T5b_FPKM	T5c_FPKM	D-ST/T-ST (FDR)	D-ST/T-ST (log2FC)	D-ST/T-ST (regulated)	Swiss_Prot_annotation	NR_annotation
TraesCS1A01G033200	0.286517	0.301371	0.254436	1.66801	0.821035	2.56609	2.61291e-07	2.26846	up	--	predicted protein [Hordeum vulgare subsp. vulgare]
TraesCS1A01G036000	0.731498	0.927364	0.634085	0	0	0	4.81312e-20	-7.34249	down	--	hypothetical protein SORBIDRAFT_07g020410 [Sorghum bicolor]
TraesCS1A01G036900	19.1443	30.3422	20.0649	1.50183	1.28126	0.870818	7.62981e-49	-4.36201	down	--	hypothetical protein F775_13767 [Aegilops tauschii]
TraesCS1A01G043000	12.5655	15.9966	14.5757	0.92351	0.27249	0.302463	1.52361e-39	-4.86428	down	--	PREDICTED: uncharacterized protein LOC101757790 [Setaria italica]
TraesCS1A01G090800	4.19953	7.00571	7.15175	1.10908	0.609595	0.240994	2.69642e-11	-3.21165	down	--	hypothetical protein TRIUR3_26282 [Triticum urartu]
TraesCS1A01G093300	0.022022	0	0.072128	0.685875	0.55276	0.849152	1.79642e-10	3.85294	up	--	Glucan 1,3-beta-glucosidase [Aegilops tauschii]
TraesCS1A01G115300	15.7438	19.5976	19.0425	6.96387	4.13702	3.65007	3.03266e-15	-2.05846	down	Phospholipase D alpha 1 (Precursor) GN=PLD1 OS=Oryza sativa subsp. japonica (Rice) PE=1 SV=2	predicted protein [Hordeum vulgare subsp. vulgare]
TraesCS1A01G116100	19.3362	31.6334	23.8153	0	0	0	2.03526e-46	-10.073	down	--	predicted protein [Hordeum vulgare subsp. vulgare]
TraesCS1A01G117500	13.8785	15.3657	14.9825	3.73406	3.30303	3.19309	1.86752e-85	-2.41078	down	Boron transporter 4 GN=BOR4 OS=Arabidopsis thaliana (Mouse-ear cress) PE=2 SV=1	Boron transporter-like protein 2 [Aegilops tauschii]
TraesCS1A01G120600	0.903206	1.20372	1.4838	0.052776	0	0.073599	3.33699e-16	-4.51207	down	--	PREDICTED: cation/H(+) antiporter 1-like [Brachypodium distachyon]
TraesCS1A01G120700	35.1261	47.5905	37.8589	16.1104	8.55701	6.43825	1.80711e-10	-2.10997	down	--	hypothetical protein TRIUR3_10580 [Triticum urartu]
TraesCS1A01G125200	40.5191	53.8357	46.8839	0.943475	0.328893	0.443573	3.42013e-94	-6.37197	down	--	hypothetical protein TRIUR3_21218 [Triticum urartu]
TraesCS1A01G129000	115.458	161.206	128.166	19.1244	23.7154	20.3848	2.54793e-61	-2.86947	down	--	hypothetical protein TRIUR3_31061 [Triticum urartu]
TraesCS1A01G132800	7.50464	9.7151	9.27759	1.55332	0.520479	0.46427	3.91911e-17	-3.44435	down	Probable metal-nicotianamine transporter YSL3 GN=OJ1171_H02.13 OS=Oryza sativa subsp. japonica (Rice) PE=2 SV=2	PREDICTED: probable metal-nicotianamine transporter YSL3 [Brachypodium distachyon]
TraesCS1A01G133200	12.8766	16.1074	14.9903	2.07892	0.837962	1.12167	1.77964e-31	-3.56748	down	Serine/threonine-protein kinase AGC1-5 {ECO:0000305} OS=Arabidopsis thaliana (Mouse-ear cress) PE=1 SV=1	predicted protein [Hordeum vulgare subsp. vulgare]
TraesCS1A01G134100	21.9931	28.9985	25.5176	6.28148	3.53045	3.19884	5.99155e-23	-2.70867	down	Sucrose transport protein SUT3 GN=OSJNBb0044I14.9 OS=Oryza sativa subsp. japonica (Rice) PE=2 SV=1	predicted protein [Hordeum vulgare subsp. vulgare]
TraesCS1A01G138700	13.2273	16.3615	13.6724	0.570119	0.359653	0.224016	1.03583e-78	-5.2823	down	MOB kinase activator-like 1 GN=At4g19045 OS=Arabidopsis thaliana (Mouse-ear cress) PE=2 SV=1	PREDICTED: MOB kinase activator-like 1 [Brachypodium distachyon]
TraesCS1A01G145700	12.9646	13.8908	12.5488	0.817414	1.00562	0.82321	2.00599e-106	-4.062	down	--	hypothetical protein F775_52111 [Aegilops tauschii]
TraesCS1A01G147200	2.8964	3.43586	2.87702	0.051482	0.025559	0.012817	3.03975e-56	-6.30299	down	--	predicted protein [Hordeum vulgare subsp. vulgare]
TraesCS1A01G148300	18.7176	25.7259	21.6361	6.32301	2.92112	2.6803	4.10646e-15	-2.5974	down	Zinc finger protein CONSTANS-LIKE 4 GN=COL4 OS=Arabidopsis thaliana (Mouse-ear cress) PE=2 SV=2	hypothetical protein F775_18365 [Aegilops tauschii]
TraesCS1A01G149300	3.43808	4.56856	1.96805	17.7238	20.3956	27.4104	1.87656e-16	2.44982	up	Cellulose synthase A catalytic subunit 7 [UDP-forming] GN=OSJNBa0006L06.10 OS=Oryza sativa subsp. japonica (Rice) PE=2 SV=1	cellulose synthase [Hordeum vulgare subsp. vulgare]
TraesCS1A01G150100	0.377366	0.365007	0.449312	1.68178	1.64892	2.48573	1.07252e-13	2.03727	up	Receptor-like protein 12 (Precursor) GN=RLP12 OS=Arabidopsis thaliana (Mouse-ear cress) PE=2 SV=2	Receptor-like protein 12 [Triticum urartu]
TraesCS1A01G150700	16.4651	20.4369	18.9456	0.891276	0.367524	0.37083	3.14745e-59	-5.17439	down	--	hypothetical protein F775_14638 [Aegilops tauschii]
TraesCS1A01G153400	8.11102	10.3044	9.04226	3.02573	1.9202	1.79175	2.55768e-20	-2.20495	down	Probable serine/threonine protein kinase IRE3 {ECO:0000305} OS=Arabidopsis thaliana (Mouse-ear cress) PE=2 SV=1	PREDICTED: serine/threonine-protein kinase tricorner-like isoform X2 [Brachypodium distachyon]
TraesCS1A01G160900	0.171965	0.139014	0.115394	0.862076	0.679886	1.14897	3.67557e-17	2.38236	up	Endoribonuclease Dicer homolog 3b GN=OSJNBa0029C15.23 OS=Oryza sativa subsp. japonica (Rice) PE=3 SV=2	Endoribonuclease Dicer-3b-like protein [Aegilops tauschii]
TraesCS1A01G165600	0.230343	0.245262	0.157504	1.03189	0.89931	1.23479	8.2061e-12	2.04336	up	Probable leucine-rich repeat receptor-like protein kinase At1g68400 (Precursor) GN=At1g68400 OS=Arabidopsis thaliana (Mouse-ear cress) PE=2 SV=1	predicted protein [Hordeum vulgare subsp. vulgare]
TraesCS1A01G172800	11.1427	14.6177	11.2021	1.21723	0.864255	1.18618	1.23421e-36	-3.6084	down	--	hypothetical protein TRIUR3_15646 [Triticum urartu]
TraesCS1A01G173600	33.2367	42.9138	31.2204	2.4762	1.42412	0.900667	5.45984e-43	-4.5226	down	LIM domain-containing protein PLIM2c {ECO:0000305} OS=Arabidopsis thaliana (Mouse-ear cress) PE=1 SV=1	Pollen-specific protein SF3 [Triticum urartu]
TraesCS1A01G183500	8.3755	10.2311	9.07042	2.90956	1.33789	1.66081	1.34302e-17	-2.42598	down	--	predicted protein [Hordeum vulgare subsp. vulgare]
TraesCS1A01G198800	0.60079	0.746972	0.461953	2.58507	4.13354	2.55909	1.46658e-08	2.06574	up	CASP-like protein 4B4 OS=Oryza sativa subsp. japonica (Rice) PE=3 SV=1	predicted protein [Hordeum vulgare subsp. vulgare]
TraesCS1A01G207100	6.79426	7.23864	7.06062	2.38675	0.871765	1.56764	1.03973e-21	-2.184	down	--	hypothetical protein TRIUR3_32478 [Triticum urartu]
TraesCS1A01G211300	0.259004	0.284614	0.265919	1.24148	1.26637	1.36455	1.54211e-11	2.0087	up	QWRF motif-containing protein 8 GN=QWRF8 OS=Arabidopsis thaliana (Mouse-ear cress) PE=2 SV=1	predicted protein [Hordeum vulgare subsp. vulgare]
TraesCS1A01G212300	7.84548	10.1525	8.28738	0	0	0	1.43148e-36	-9.17364	down	Expansin-B2 (Precursor) GN=OSJNBb0014I11.2 OS=Oryza sativa subsp. japonica (Rice) PE=2 SV=2	beta-expansin TaEXPB4 [Triticum aestivum]
TraesCS1A01G221300	3.03612	3.79331	3.16611	0.90369	0.955878	0.923993	2.85439e-32	-2.06877	down	--	hypothetical protein F775_20429 [Aegilops tauschii]
TraesCS1A01G222600	8.79416	10.444	9.07077	2.79673	0.579535	1.31615	5.1114e-09	-2.66301	down	Uncharacterized protein At5g39865 GN=At5g39865 OS=Arabidopsis thaliana (Mouse-ear cress) PE=2 SV=1	PREDICTED: uncharacterized protein At3g28850 [Brachypodium distachyon]
TraesCS1A01G230800	45.1283	74.0381	50.9213	2.83652	1.44482	1.98092	5.6492e-67	-4.8715	down	Late embryogenesis abundant protein Lea5-A GN=LEA5-A OS=Gossypium hirsutum (Upland cotton) PE=2 SV=1	PREDICTED: late embryogenesis abundant protein Lea5-like [Brachypodium distachyon]
TraesCS1A01G231600	11.6489	13.0682	12.4184	0.193094	0.109484	0.176154	2.70082e-124	-6.29239	down	Cell wall / vacuolar inhibitor of fructosidase 2 (Precursor) GN=MUB3.14 OS=Arabidopsis thaliana (Mouse-ear cress) PE=1 SV=1	Pectinesterase inhibitor [Aegilops tauschii]
TraesCS1A01G239200	8.25078	11.7641	9.69845	0.803331	0.691055	0.792771	1.05471e-72	-3.85081	down	Probable ADP-ribosylation factor GTPase-activating protein AGD11 GN=AGD11 OS=Arabidopsis thaliana (Mouse-ear cress) PE=2 SV=1	predicted protein [Hordeum vulgare subsp. vulgare]
TraesCS1A01G263600	5.37648	5.81921	4.3764	0.432536	0.219649	0.3807	1.90758e-53	-3.90448	down	Gibberellin 20 oxidase 2 OS=Oryza sativa subsp. japonica (Rice) PE=1 SV=1	predicted protein [Hordeum vulgare subsp. vulgare]
TraesCS1A01G263900	0.062088	0.118842	0	0.680111	0.604068	1.12215	4.31837e-06	3.11529	up	Pectinesterase 41 (Precursor) GN=T14P8.14 OS=Arabidopsis thaliana (Mouse-ear cress) PE=2 SV=2	Os01g0311800 [Oryza sativa Japonica Group]
TraesCS1A01G266200	2.76427	3.15067	3.0422	0.702993	0.492503	0.319275	4.60044e-21	-2.71033	down	Putative clathrin assembly protein At1g03050 GN=At1g03050 OS=Arabidopsis thaliana (Mouse-ear cress) PE=2 SV=1	Putative clathrin assembly protein [Aegilops tauschii]
TraesCS1A01G267600	12.7583	18.917	15.1114	4.79786	3.80226	3.0798	6.63093e-21	-2.18319	down	DnaJ protein ERDJ3B (Precursor) GN=F26K9.30 OS=Arabidopsis thaliana (Mouse-ear cress) PE=1 SV=1	hypothetical protein F775_43183 [Aegilops tauschii]
TraesCS1A01G267700	0.737555	0.798505	0.159817	5.47995	5.98142	9.02986	2.3501e-06	3.06243	up	Beta-galactosidase 7 (Precursor) OS=Oryza sativa subsp. japonica (Rice) PE=3 SV=1	Beta-galactosidase 7 [Triticum urartu]
TraesCS1A01G277400	0.205864	0.227075	0.284233	0.994587	0.98312	1.4991	1.81087e-09	2.00335	up	Cytochrome P450 94C1 GN=CYP94C1 OS=Arabidopsis thaliana (Mouse-ear cress) PE=2 SV=1	predicted protein [Hordeum vulgare subsp. vulgare]
TraesCS1A01G284100	5.6331	9.04146	7.7773	1.79565	1.52942	1.78393	8.08889e-27	-2.35805	down	--	hypothetical protein F775_08818 [Aegilops tauschii]
TraesCS1A01G285100	2.6188	5.04463	2.71387	1.00906	1.02029	0.704611	5.68266e-09	-2.07174	down	GATA transcription factor 16 GN=GATA16 OS=Arabidopsis thaliana (Mouse-ear cress) PE=2 SV=1	PREDICTED: putative GATA transcription factor 22 [Brachypodium distachyon]
TraesCS1A01G287900	37.4484	45.0568	41.1185	10.004	5.5167	4.75335	1.99198e-24	-2.77104	down	Serine/threonine-protein kinase At3g07070 GN=At3g07070 OS=Arabidopsis thaliana (Mouse-ear cress) PE=2 SV=1	Serine/threonine-protein kinase PBS1 [Aegilops tauschii]
TraesCS1A01G288100	5.57363	7.72323	6.83334	0.583915	0.182849	0.251706	8.77529e-34	-4.28458	down	Protein IQ-DOMAIN 1 GN=IQD1 OS=Arabidopsis thaliana (Mouse-ear cress) PE=1 SV=1	predicted protein [Hordeum vulgare subsp. vulgare]
TraesCS1A01G290700	13.8968	15.6516	14.8238	2.201	1.62267	1.41412	2.01523e-92	-3.36626	down	Putative respiratory burst oxidase homolog protein H GN=RBOHH OS=Arabidopsis thaliana (Mouse-ear cress) PE=3 SV=1	predicted protein [Hordeum vulgare subsp. vulgare]
TraesCS1A01G291000	13.6064	16.5981	14.0654	2.49108	1.52952	1.33218	7.98123e-39	-3.20777	down	--	PREDICTED: nucleoporin nup211 [Brachypodium distachyon]
TraesCS1A01G297700	2.10948	2.59196	2.26446	0.293775	0.199305	0.146751	5.80036e-42	-3.57759	down	Cation/H(+) antiporter 15 GN=CHX15 OS=Arabidopsis thaliana (Mouse-ear cress) PE=2 SV=1	PREDICTED: cation/H(+) antiporter 15-like [Brachypodium distachyon]
TraesCS1A01G301500	4.93284	6.3158	5.06712	1.08628	0.39756	0.446219	1.26626e-18	-3.17614	down	Thioredoxin H5 GN=OSJNBa0018K15.18 OS=Oryza sativa subsp. japonica (Rice) PE=2 SV=1	predicted protein [Hordeum vulgare subsp. vulgare]
TraesCS1A01G302200	30.2446	41.994	34.9831	11.7618	7.96866	5.1207	3.23737e-14	-2.26656	down	V-type proton ATPase subunit E GN=VATE OS=Citrus unshiu (Satsuma mandarin) PE=2 SV=1	V-type proton ATPase subunit E [Triticum urartu]
TraesCS1A01G303000	3.8141	4.3353	4.7657	0.563109	0.256649	0.377758	5.77515e-32	-3.56178	down	--	hypothetical protein TRIUR3_22966 [Triticum urartu]
TraesCS1A01G303800	4.91656	5.93924	5.69048	1.46825	0.945364	1.18323	2.03667e-32	-2.37982	down	Cation/H(+) antiporter 15 GN=CHX15 OS=Arabidopsis thaliana (Mouse-ear cress) PE=2 SV=1	hypothetical protein SORBIDRAFT_09g023730 [Sorghum bicolor]
TraesCS1A01G304100	54.4526	59.7548	63.0205	13.3763	6.43491	7.2095	2.14963e-27	-2.90275	down	L-ascorbate oxidase homolog (Precursor) GN=Bp10 OS=Brassica napus (Rape) PE=2 SV=1	predicted protein [Hordeum vulgare subsp. vulgare]
TraesCS1A01G305200	1.47294	1.8328	1.40303	0.458249	0.219433	0.160846	9.43841e-12	-2.62346	down	MATE efflux family protein 1 GN=F11M15.20 OS=Arabidopsis thaliana (Mouse-ear cress) PE=2 SV=2	putative citrate efflux MATE transporter [Secale cereale]
TraesCS1A01G306600	14.6976	15.957	15.1696	3.12111	4.44239	3.78462	2.28007e-40	-2.20754	down	Chlorophyll a-b binding protein, chloroplastic (Precursor) OS=Spinacia oleracea (Spinach) PE=1 SV=1	Chlorophyll a-b binding protein 3C, chloroplastic [Triticum urartu]
TraesCS1A01G312600	3.11329	3.83245	3.80917	1.00481	0.401435	0.495082	8.56737e-15	-2.63406	down	Putative xyloglucan glycosyltransferase 10 GN=P0474G09.119 OS=Oryza sativa subsp. japonica (Rice) PE=3 SV=1	hypothetical protein F775_15407 [Aegilops tauschii]
TraesCS1A01G317300	2.91096	3.80788	3.8818	0.469991	0.10879	0.127743	3.77899e-17	-3.8863	down	Serine/threonine-protein kinase CDL1 {ECO:0000305} OS=Arabidopsis thaliana (Mouse-ear cress) PE=1 SV=1	protein kinase [Triticum urartu]
TraesCS1A01G320400	2.99558	3.70425	4.27796	0.674827	0.556751	0.531165	5.24284e-40	-2.81504	down	Probable potassium transporter 3 OS=Oryza sativa subsp. japonica (Rice) PE=2 SV=1	PREDICTED: probable potassium transporter 3 [Brachypodium distachyon]
TraesCS1A01G342700	120.204	156.836	128.597	44.1907	24.9999	22.3574	1.28925e-17	-2.31629	down	Soluble inorganic pyrophosphatase GN=IPP OS=Zea mays (Maize) PE=2 SV=1	PREDICTED: soluble inorganic pyrophosphatase-like [Brachypodium distachyon]
TraesCS1A01G346200	28.5008	31.2024	28.8552	1.80027	1.05097	1.05048	3.96592e-96	-4.65989	down	Alpha-glucan water dikinase, chloroplastic (Precursor) GN=R1 OS=Solanum tuberosum (Potato) PE=1 SV=2	Alpha-glucan water dikinase, chloroplastic [Triticum urartu]
TraesCS1A01G358500	1.78001	1.82971	2.25883	0.424435	0.19795	0.155814	6.23456e-19	-2.96939	down	Myosin-17 GN=F7C8.80 OS=Arabidopsis thaliana (Mouse-ear cress) PE=1 SV=2	Myosin-J heavy chain [Aegilops tauschii]
TraesCS1A01G365500	25.1605	34.871	33.7234	1.37464	0.557164	0.586459	6.34511e-61	-5.28674	down	--	hypothetical protein TRIUR3_05412 [Triticum urartu]
TraesCS1A01G367000	0.2198	0.168295	0.149895	1.25366	0.650849	1.73286	1.20092e-07	2.39594	up	Mitogen-activated protein kinase kinase kinase NPK1 GN=NPK1 OS=Nicotiana tabacum (Common tobacco) PE=1 SV=1	predicted protein [Hordeum vulgare subsp. vulgare]
TraesCS1A01G370400	0.036679	0.302848	0.547327	2.06682	2.13297	3.49207	6.30643e-05	2.63152	up	Ethylene-responsive transcription factor ERF109 GN=ERF109 OS=Arabidopsis thaliana (Mouse-ear cress) PE=1 SV=1	Ethylene-responsive transcription factor ERF109 [Aegilops tauschii]
TraesCS1A01G382000	1.24033	1.54471	1.13135	0.021426	0	0.015487	4.88941e-31	-6.04075	down	--	hypothetical protein TRIUR3_17553 [Triticum urartu]
TraesCS1A01G384800	0.156096	0.114309	0.13978	1.31996	0.948043	1.33186	1.265e-11	2.74119	up	--	hypothetical protein CH29B_p069 (chloroplast) (chloroplast) [Chlorella sp. ArM0029B]
TraesCS1A01G385800	1.98172	2.30898	0.576015	8.19311	11.2082	11.7893	2.23323e-08	2.37256	up	Probable purine permease 4 GN=PUP4 OS=Arabidopsis thaliana (Mouse-ear cress) PE=2 SV=1	predicted protein [Hordeum vulgare subsp. vulgare]
TraesCS1A01G389700	3.09734	3.88834	3.63596	0	0	0	1.50802e-35	-9.07273	down	--	PREDICTED: galactose oxidase-like [Brachypodium distachyon]
TraesCS1A01G392100	2.42808	2.75507	2.23236	0.072361	0.016297	0	1.81982e-44	-6.10423	down	Rop guanine nucleotide exchange factor 9 GN=ROPGEF9 OS=Arabidopsis thaliana (Mouse-ear cress) PE=1 SV=1	predicted protein [Hordeum vulgare subsp. vulgare]
TraesCS1A01G394900	0	0.032838	0.015565	0.772246	1.48936	1.0352	4.46399e-18	5.25345	up	Premnaspirodiene oxygenase GN=CYP71D55 OS=Hyoscyamus muticus (Egyptian henbane) PE=1 SV=1	predicted protein [Hordeum vulgare subsp. vulgare]
TraesCS1A01G400900	0.962034	0.85161	0.902719	0.000577	0.048319	0.001971	5.88119e-18	-4.99963	down	F-box protein At5g07610 GN=At5g07610 OS=Arabidopsis thaliana (Mouse-ear cress) PE=2 SV=1	PREDICTED: F-box protein At5g49610-like [Brachypodium distachyon]
TraesCS1A01G403700	427.408	553.395	479.968	116.099	66.9043	62.2425	6.98069e-27	-2.74127	down	--	hypothetical protein TRIUR3_00868 [Triticum urartu]
TraesCS1A01G404600	0.538846	0.521428	0.440964	0.026139	0.04695	0	3.09153e-15	-4.22736	down	Subtilisin-like protease SBT3.5 {ECO:0000303|PubMed:16193095} (Precursor) OS=Arabidopsis thaliana (Mouse-ear cress) PE=1 SV=1	Xylem serine proteinase 1 [Aegilops tauschii]
TraesCS1A01G405800	1.35237	1.94256	1.51184	0.210582	0.080323	0.128604	1.326e-22	-3.58713	down	Sugar transporter ERD6-like 6 GN=At1g75220 OS=Arabidopsis thaliana (Mouse-ear cress) PE=1 SV=1	predicted protein [Hordeum vulgare subsp. vulgare]
TraesCS1A01G410100	3.0967	3.5651	4.2154	0.013175	0	0	6.33661e-23	-7.12654	down	Cucumber peeling cupredoxin OS=Cucumis sativus (Cucumber) PE=1 SV=3	Cucumber peeling cupredoxin [Triticum urartu]
TraesCS1A01G410200	60.8845	61.094	66.344	5.00797	3.53442	3.25693	9.02992e-109	-4.21271	down	Cucumber peeling cupredoxin OS=Cucumis sativus (Cucumber) PE=1 SV=3	predicted protein [Hordeum vulgare subsp. vulgare]
TraesCS1A01G412400	2.056	2.91538	2.634	0.717456	0.279693	0.235004	6.76041e-11	-2.70568	down	--	hypothetical protein F775_13079 [Aegilops tauschii]
TraesCS1A01G415300	19.5127	21.1501	20.2702	3.42738	2.17221	2.34527	8.62988e-58	-3.11819	down	Mitogen-activated protein kinase 17 GN=OJ1126_B10.5 OS=Oryza sativa subsp. japonica (Rice) PE=2 SV=2	Mitogen-activated protein kinase 17 [Triticum urartu]
TraesCS1A01G424900	1.61863	0.767428	0.811975	0.184449	0.102853	0.209185	5.19635e-11	-2.74537	down	Protein kinase GN=PHY1 OS=Ceratodon purpureus (Fire moss) PE=3 SV=3	PREDICTED: mitogen-activated protein kinase kinase kinase 7-like [Brachypodium distachyon]
TraesCS1A01G443500	52.6492	71.7883	64.0802	5.14167	3.38165	2.42537	6.59464e-56	-4.2393	down	Alpha carbonic anhydrase 7 (Precursor) GN=ACA7 OS=Arabidopsis thaliana (Mouse-ear cress) PE=2 SV=1	Bifunctional monodehydroascorbate reductase and carbonic anhydrase nectarin-3 [Aegilops tauschii]
TraesCS1A01G443800	10.4385	12.8586	11.9762	1.21872	0.611073	0.764152	1.18755e-52	-3.90022	down	Pathogenesis-related protein 1C (Precursor) OS=Nicotiana tabacum (Common tobacco) PE=2 SV=3	PREDICTED: pathogenesis-related protein PRB1-3-like [Brachypodium distachyon]
TraesCS1A01G444000	10.4498	16.2782	11.8522	1.9043	0.859936	0.657905	8.97167e-22	-3.57055	down	Pathogenesis-related protein 1A (Precursor) OS=Nicotiana tabacum (Common tobacco) PE=1 SV=1	Pathogenesis-related protein 1A [Aegilops tauschii]
TraesCS1A01G444700	18.5487	23.0777	21.3241	1.09994	0.616757	0.624032	1.59973e-92	-4.88286	down	Aspartic proteinase CDR1 (Precursor) GN=CDR1 OS=Arabidopsis thaliana (Mouse-ear cress) PE=1 SV=1	Aspartic proteinase nepenthesin-2 [Aegilops tauschii]
TraesCS1A01G446100	1.23747	1.71354	1.5034	0.032871	0.011717	0.016337	1.01099e-39	-5.66366	down	--	hypothetical protein F775_17579 [Aegilops tauschii]
TraesCS1B01G024700	1.36908	1.61163	2.20207	0.26402	0.343545	0.321883	8.50805e-21	-2.39786	down	Phosphoinositide phosphatase SAC7 GN=F26O13.100 OS=Arabidopsis thaliana (Mouse-ear cress) PE=2 SV=1	Phosphatidylinositide phosphatase SAC1 [Triticum urartu]
TraesCS1B01G120400	0	0.013983	0	1.00525	6.92341	9.19299	6.84664e-09	5.67692	up	Desiccation-related protein PCC13-62 (Precursor) OS=Craterostigma plantagineum (Blue gem) PE=2 SV=1	predicted protein [Hordeum vulgare subsp. vulgare]
TraesCS1B01G135200	10.5475	13.572	13.0846	3.71799	2.19486	1.84739	8.17623e-19	-2.42739	down	Phospholipase D alpha 1 (Precursor) GN=PLD1 OS=Oryza sativa subsp. japonica (Rice) PE=1 SV=2	predicted protein [Hordeum vulgare subsp. vulgare]
TraesCS1B01G137300	3.24803	5.65976	4.99896	0.612885	1.10081	0.485583	1.4884e-33	-2.71732	down	Boron transporter 4 GN=BOR4 OS=Arabidopsis thaliana (Mouse-ear cress) PE=2 SV=1	Boron transporter-like protein 2 [Aegilops tauschii]
TraesCS1B01G140000	17.9205	24.8002	19.6813	8.54967	4.08494	3.75828	4.57124e-10	-2.08137	down	--	hypothetical protein F775_08889 [Aegilops tauschii]
TraesCS1B01G141400	3.93491	4.62596	3.60913	0.774322	0.891802	0.660467	1.77094e-39	-2.57355	down	Protein CHUP1, chloroplastic GN=CHUP1 OS=Arabidopsis thaliana (Mouse-ear cress) PE=1 SV=1	hypothetical protein F775_15983 [Aegilops tauschii]
TraesCS1B01G144200	5.11796	3.55304	3.43455	0	0.100811	0	8.2865e-05	-4.22466	down	--	hypothetical protein F775_14058 [Aegilops tauschii]
TraesCS1B01G147900	22.646	10.7062	14.9169	2.92835	2.80846	2.44331	1.90001e-21	-2.70554	down	--	hypothetical protein TRIUR3_31061 [Triticum urartu]
TraesCS1B01G152400	10.0177	13.2355	11.7473	1.03044	0.440518	0.188063	1.81856e-34	-4.65392	down	MOB kinase activator-like 1 GN=At4g19045 OS=Arabidopsis thaliana (Mouse-ear cress) PE=2 SV=1	PREDICTED: MOB kinase activator-like 1 [Brachypodium distachyon]
TraesCS1B01G152700	10.1011	12.1617	10.6491	1.66485	0.786328	1.00216	1.48724e-37	-3.39564	down	Serine/threonine-protein kinase AGC1-5 {ECO:0000305} OS=Arabidopsis thaliana (Mouse-ear cress) PE=1 SV=1	predicted protein [Hordeum vulgare subsp. vulgare]
TraesCS1B01G153100	33.839	39.778	36.3057	1.77392	1.40186	0.872361	6.08852e-92	-4.89908	down	--	hypothetical protein F775_24993 [Aegilops tauschii]
TraesCS1B01G153500	9.31188	11.1643	9.98529	2.91785	0.996006	1.61928	3.61951e-16	-2.51945	down	Probable metal-nicotianamine transporter YSL3 GN=OJ1171_H02.13 OS=Oryza sativa subsp. japonica (Rice) PE=2 SV=2	PREDICTED: probable metal-nicotianamine transporter YSL3 [Brachypodium distachyon]
TraesCS1B01G162600	19.5746	20.5659	19.0152	2.78417	1.59957	1.26126	5.26428e-38	-3.52818	down	--	hypothetical protein F775_52111 [Aegilops tauschii]
TraesCS1B01G165300	2.27176	3.08698	2.17859	0	0	0	1.28703e-27	-8.28181	down	--	predicted protein [Hordeum vulgare subsp. vulgare]
TraesCS1B01G166000	17.5173	23.003	18.9548	4.31904	3.00552	2.61441	4.66499e-36	-2.70204	down	Zinc finger protein CONSTANS-LIKE 4 GN=COL4 OS=Arabidopsis thaliana (Mouse-ear cress) PE=2 SV=2	hypothetical protein F775_18365 [Aegilops tauschii]
TraesCS1B01G167200	6.60134	7.82499	3.32723	31.1275	36.4519	47.68	8.36338e-16	2.43285	up	Cellulose synthase A catalytic subunit 7 [UDP-forming] GN=OSJNBa0006L06.10 OS=Oryza sativa subsp. japonica (Rice) PE=2 SV=1	cellulose synthase [Hordeum vulgare subsp. vulgare]
TraesCS1B01G168300	11.6695	13.8922	12.4892	0.119086	0.053539	0.072189	4.06937e-200	-7.33923	down	--	hypothetical protein F775_14638 [Aegilops tauschii]
TraesCS1B01G171500	6.32276	8.1784	7.32558	1.41559	1.1639	0.887976	1.8297e-38	-2.82092	down	Probable serine/threonine protein kinase IREH1 {ECO:0000305} OS=Arabidopsis thaliana (Mouse-ear cress) PE=1 SV=1	PREDICTED: serine/threonine-protein kinase tricorner-like isoform X2 [Brachypodium distachyon]
TraesCS1B01G190700	14.2638	15.0601	20.5738	3.36243	2.20078	2.05847	3.41918e-40	-2.96088	down	Folylpolyglutamate synthase {ECO:0000250|UniProtKB:Q05932, ECO:0000312|EMBL:CAC80839.2} GN=K18J17.17 OS=Arabidopsis thaliana (Mouse-ear cress) PE=1 SV=1	PREDICTED: folylpolyglutamate synthase-like isoform X1 [Brachypodium distachyon]
TraesCS1B01G191500	17.6199	25.1319	22.4206	1.62395	1.17923	0.242537	7.72132e-25	-4.39567	down	--	hypothetical protein F775_22151 [Aegilops tauschii]
TraesCS1B01G205200	8.23465	9.74652	9.45146	3.57804	1.99628	1.75436	5.92089e-13	-2.0989	down	--	predicted protein [Hordeum vulgare subsp. vulgare]
TraesCS1B01G208700	5.41856	7.24336	5.68961	2.02705	1.46589	1.60464	1.06379e-16	-2.0266	down	Probable calcium-binding protein CML11 OS=Oryza sativa subsp. japonica (Rice) PE=2 SV=1	putative calcium-binding protein CML11 [Triticum urartu]
TraesCS1B01G220900	5.57483	4.32081	4.87328	1.47372	0.957831	1.45795	3.43716e-26	-2.02974	down	--	hypothetical protein TRIUR3_32478 [Triticum urartu]
TraesCS1B01G225700	0.141485	0.172999	0.33039	1.45235	0.86163	0.941354	7.20796e-06	2.1429	up	Expansin-B6 (Precursor) GN=OSJNBb0014I11.3 OS=Oryza sativa subsp. japonica (Rice) PE=2 SV=1	hypothetical protein F775_30105 [Aegilops tauschii]
TraesCS1B01G225900	2.87699	2.84611	3.71023	0	0	0.105526	0.000225927	-4.00389	down	Expansin-B2 (Precursor) GN=OSJNBb0014I11.2 OS=Oryza sativa subsp. japonica (Rice) PE=2 SV=2	beta-expansin TaEXPB4 [Triticum aestivum]
TraesCS1B01G226000	0.9521	0.677874	1.13745	5.8684	6.77001	6.48381	2.51654e-28	2.54835	up	Expansin-B3 (Precursor) OS=Oryza sativa subsp. japonica (Rice) PE=2 SV=2	beta-expansin TaEXPB2 [Triticum aestivum]
TraesCS1B01G235900	10.5856	12.3369	10.7732	1.82901	0.611643	0.61771	1.48851e-19	-3.52804	down	Uncharacterized protein At5g39865 GN=At5g39865 OS=Arabidopsis thaliana (Mouse-ear cress) PE=2 SV=1	PREDICTED: uncharacterized protein At3g28850 [Brachypodium distachyon]
TraesCS1B01G242900	29.9877	40.5933	31.2848	2.53758	2.25784	1.12493	2.11094e-50	-4.2278	down	Pectinesterase inhibitor (Precursor) GN=PMEI OS=Actinidia deliciosa (Kiwi) PE=1 SV=2	Pectinesterase inhibitor [Aegilops tauschii]
TraesCS1B01G251400	8.65699	9.18782	7.43814	0.640198	0.296966	0.662456	6.33793e-85	-4.23289	down	Probable ADP-ribosylation factor GTPase-activating protein AGD11 GN=AGD11 OS=Arabidopsis thaliana (Mouse-ear cress) PE=2 SV=1	Putative ADP-ribosylation factor GTPase-activating protein AGD11 [Aegilops tauschii]
TraesCS1B01G260800	9.34923	11.8516	10.8083	2.5833	1.54665	1.72349	1.05941e-28	-2.62244	down	Endo-1,3;1,4-beta-D-glucanase (Precursor) OS=Zea mays (Maize) PE=1 SV=1	Endo-1,3;1,4-beta-D-glucanase [Aegilops tauschii]
TraesCS1B01G264500	36.6441	29.5363	58.3522	1.44089	1.14447	1.16738	3.71072e-64	-5.12517	down	--	predicted protein [Hordeum vulgare subsp. vulgare]
TraesCS1B01G264600	0.056266	0.030084	0.086029	1.34315	0.547289	0.552419	1.83073e-10	3.35285	up	Pyrophosphate-energized vacuolar membrane proton pump OS=Vigna radiata var. radiata (Mung bean) PE=1 SV=4	predicted protein [Hordeum vulgare subsp. vulgare]
TraesCS1B01G266800	0.862586	1.14066	0.777693	5.19834	4.8145	5.06714	5.67279e-56	2.16212	up	Uridine nucleosidase 1 GN=URH1 OS=Arabidopsis thaliana (Mouse-ear cress) PE=1 SV=2	predicted protein [Hordeum vulgare subsp. vulgare]
TraesCS1B01G277200	1.1208	1.4758	1.19433	0.134316	0.041051	0.107986	1.43772e-25	-3.74479	down	Putative clathrin assembly protein At1g03050 GN=At1g03050 OS=Arabidopsis thaliana (Mouse-ear cress) PE=2 SV=1	Putative clathrin assembly protein [Aegilops tauschii]
TraesCS1B01G278300	9.67538	14.0784	11.0871	2.9512	1.29192	1.54149	2.47572e-17	-2.72798	down	DnaJ protein ERDJ3B (Precursor) GN=F26K9.30 OS=Arabidopsis thaliana (Mouse-ear cress) PE=1 SV=1	hypothetical protein F775_43183 [Aegilops tauschii]
TraesCS1B01G293400	6.83302	7.84397	7.9031	1.84056	1.27059	1.22777	2.31455e-29	-2.54843	down	--	hypothetical protein F775_08818 [Aegilops tauschii]
TraesCS1B01G296600	2.30387	2.3445	3.59365	0.196814	0.819267	0.566833	1.22327e-07	-2.45107	down	--	hypothetical protein F775_19095 [Aegilops tauschii]
TraesCS1B01G297300	41.1593	49.3232	51.1307	11.3341	6.92667	6.07724	2.02263e-25	-2.69097	down	Serine/threonine-protein kinase At3g07070 GN=At3g07070 OS=Arabidopsis thaliana (Mouse-ear cress) PE=2 SV=1	Serine/threonine-protein kinase PBS1 [Aegilops tauschii]
TraesCS1B01G297500	5.23348	5.79815	4.78434	0.312146	0.275299	0.353375	3.34289e-106	-4.21925	down	Protein IQ-DOMAIN 1 GN=IQD1 OS=Arabidopsis thaliana (Mouse-ear cress) PE=1 SV=1	predicted protein [Hordeum vulgare subsp. vulgare]
TraesCS1B01G300000	15.2869	16.093	16.8828	1.95883	1.27619	1.35034	2.54777e-80	-3.60691	down	Putative respiratory burst oxidase homolog protein H GN=RBOHH OS=Arabidopsis thaliana (Mouse-ear cress) PE=3 SV=1	predicted protein [Hordeum vulgare subsp. vulgare]
TraesCS1B01G300400	9.67609	11.1573	9.52922	2.20415	1.41628	1.02287	1.8185e-26	-2.86593	down	--	PREDICTED: nucleoporin nup211 [Brachypodium distachyon]
TraesCS1B01G307100	3.98732	4.88295	4.09401	0.312991	0.336855	0.359959	4.4957e-96	-3.85057	down	Cation/H(+) antiporter 15 GN=CHX15 OS=Arabidopsis thaliana (Mouse-ear cress) PE=2 SV=1	PREDICTED: cation/H(+) antiporter 15-like [Brachypodium distachyon]
TraesCS1B01G311300	3.14768	4.7787	3.44177	0.71757	0.432982	0.507524	6.33056e-30	-3.05563	down	Thioredoxin H5 GN=OSJNBa0018K15.18 OS=Oryza sativa subsp. japonica (Rice) PE=2 SV=1	predicted protein [Hordeum vulgare subsp. vulgare]
TraesCS1B01G312000	26.6617	39.1645	31.8422	10.9852	7.55777	6.10364	9.02048e-17	-2.16148	down	V-type proton ATPase subunit E GN=VATE OS=Citrus unshiu (Satsuma mandarin) PE=2 SV=1	V-type proton ATPase subunit E [Triticum urartu]
TraesCS1B01G313300	3.32008	3.43607	3.02339	0.733997	0.355019	0.358536	1.29092e-22	-2.84595	down	--	hypothetical protein TRIUR3_22966 [Triticum urartu]
TraesCS1B01G314100	3.98945	5.40566	5.00883	0.911879	0.593311	0.440166	1.25672e-27	-3.03522	down	Cation/H(+) antiporter 15 GN=CHX15 OS=Arabidopsis thaliana (Mouse-ear cress) PE=2 SV=1	hypothetical protein SORBIDRAFT_09g023730 [Sorghum bicolor]
TraesCS1B01G314600	57.9104	73.2861	64.9489	9.20677	4.67264	4.43912	2.6113e-37	-3.55406	down	L-ascorbate oxidase homolog (Precursor) GN=Bp10 OS=Brassica napus (Rape) PE=2 SV=1	predicted protein [Hordeum vulgare subsp. vulgare]
TraesCS1B01G315900	2.76583	2.68448	2.58609	0.56155	0.457689	0.369924	8.28277e-32	-2.56869	down	MATE efflux family protein 1 GN=F11M15.20 OS=Arabidopsis thaliana (Mouse-ear cress) PE=2 SV=2	putative citrate efflux MATE transporter [Secale cereale]
TraesCS1B01G324200	4.90402	5.56068	6.42037	1.41115	0.782501	0.761153	1.59784e-22	-2.67297	down	Putative xyloglucan glycosyltransferase 10 GN=P0474G09.119 OS=Oryza sativa subsp. japonica (Rice) PE=3 SV=1	hypothetical protein F775_15407 [Aegilops tauschii]
TraesCS1B01G329700	3.71659	4.5206	3.573	0.498741	0.127379	0.136079	1.66143e-18	-3.94276	down	Serine/threonine-protein kinase PBS1 GN=PBS1 OS=Arabidopsis thaliana (Mouse-ear cress) PE=1 SV=1	protein kinase [Triticum urartu]
TraesCS1B01G332600	3.97118	4.216	4.0852	1.58676	0.724322	0.608033	1.75554e-10	-2.21463	down	Probable potassium transporter 3 OS=Oryza sativa subsp. japonica (Rice) PE=2 SV=1	PREDICTED: probable potassium transporter 3 [Brachypodium distachyon]
TraesCS1B01G355700	0.172408	0.159388	0.190761	1.20771	1.07826	1.30612	4.32637e-30	2.541	up	Receptor-like protein kinase HSL1 (Precursor) GN=HSL1 OS=Arabidopsis thaliana (Mouse-ear cress) PE=2 SV=1	predicted protein [Hordeum vulgare subsp. vulgare]
TraesCS1B01G355800	102.841	135.412	108.516	37.7019	20.4724	20.4919	4.70483e-18	-2.31542	down	Soluble inorganic pyrophosphatase GN=IPP OS=Zea mays (Maize) PE=2 SV=1	PREDICTED: soluble inorganic pyrophosphatase-like [Brachypodium distachyon]
TraesCS1B01G359500	1.814	2.34389	3.56694	0.066461	0.48559	0.942137	0.000525955	-2.29448	down	--	predicted protein [Hordeum vulgare subsp. vulgare]
TraesCS1B01G359800	30.8908	33.7667	33.2136	4.60051	2.60559	2.39885	2.91984e-58	-3.59895	down	Alpha-glucan water dikinase, chloroplastic (Precursor) GN=R1 OS=Citrus reticulata (Tangerine) PE=2 SV=1	hypothetical protein F775_52627 [Aegilops tauschii]
TraesCS1B01G370900	10.3324	12.3844	10.2557	1.68888	1.17097	1.5352	1.39693e-60	-3.09324	down	Calcineurin B-like protein 4 OS=Oryza sativa subsp. japonica (Rice) PE=1 SV=1	calcineurin B-like protein 4 [Hordeum brevisubulatum]
TraesCS1B01G375000	1.98788	2.05819	2.16998	0.542073	0.492492	0.323214	2.78158e-30	-2.28455	down	Myosin-11 GN=T22H22.1 OS=Arabidopsis thaliana (Mouse-ear cress) PE=3 SV=1	Myosin-J heavy chain [Aegilops tauschii]
TraesCS1B01G380000	0.811412	1.58452	0.968	0.008897	0.037929	0	2.48323e-19	-5.36994	down	Transcription factor bHLH87 GN=MHC9.1 OS=Arabidopsis thaliana (Mouse-ear cress) PE=2 SV=1	predicted protein [Hordeum vulgare subsp. vulgare]
TraesCS1B01G384900	0.17247	0.403981	0.362547	1.88745	1.61329	2.11181	7.97844e-11	2.29543	up	Mitogen-activated protein kinase kinase kinase NPK1 GN=NPK1 OS=Nicotiana tabacum (Common tobacco) PE=1 SV=1	predicted protein [Hordeum vulgare subsp. vulgare]
TraesCS1B01G389800	0.159363	0.149488	0.3267	0.848606	0.841502	1.68796	1.73652e-05	2.08034	up	Ethylene-responsive transcription factor ERF109 GN=ERF109 OS=Arabidopsis thaliana (Mouse-ear cress) PE=1 SV=1	AP2 domain containing protein [Zea mays]
TraesCS1B01G389900	0.56229	0.79247	1.11861	4.56609	3.48162	6.06145	4.85754e-11	2.24436	up	Ethylene-responsive transcription factor ERF109 GN=ERF109 OS=Arabidopsis thaliana (Mouse-ear cress) PE=1 SV=1	predicted protein [Hordeum vulgare subsp. vulgare]
TraesCS1B01G392300	0.42465	0.26184	0.328411	1.75127	1.67803	1.96952	1.90109e-14	2.15372	up	AP2/ERF and B3 domain-containing protein Os05g0549800 OS=Oryza sativa subsp. japonica (Rice) PE=2 SV=1	predicted protein [Hordeum vulgare subsp. vulgare]
TraesCS1B01G396700	3.39495	4.14884	3.98791	1.08677	0.454982	0.585271	9.9821e-16	-2.58078	down	Adenylate isopentenyltransferase OS=Humulus lupulus (European hop) PE=1 SV=1	isopentenyltransferase 8, partial [Triticum aestivum]
TraesCS1B01G409100	21.1641	27.2427	20.0984	7.63831	4.33542	4.45938	1.51492e-17	-2.2319	down	Thiol protease SEN102 (Precursor) GN=SEN102 OS=Hemerocallis sp. (Daylily) PE=2 SV=1	Xylem cysteine proteinase 2 [Aegilops tauschii]
TraesCS1B01G413300	0.488307	0.373662	0.24716	1.36112	2.20118	2.15469	3.14323e-09	2.07901	up	Probable purine permease 4 GN=PUP4 OS=Arabidopsis thaliana (Mouse-ear cress) PE=2 SV=1	predicted protein [Hordeum vulgare subsp. vulgare]
TraesCS1B01G413500	2.14053	1.77724	1.62365	10.8954	12.082	16.9767	5.58538e-34	2.60652	up	Probable purine permease 4 GN=PUP4 OS=Arabidopsis thaliana (Mouse-ear cress) PE=2 SV=1	predicted protein [Hordeum vulgare subsp. vulgare]
TraesCS1B01G417800	2.48275	3.57967	2.69976	0	0	0	1.67263e-32	-8.80198	down	--	PREDICTED: galactose oxidase-like [Brachypodium distachyon]
TraesCS1B01G418500	0.065181	0.114338	0.0294	0.268992	0.430166	0.646321	2.44697e-05	2.29739	up	Glutamate receptor 3.5 (Precursor) GN=T32F6.9 OS=Arabidopsis thaliana (Mouse-ear cress) PE=2 SV=2	predicted protein [Hordeum vulgare subsp. vulgare]
TraesCS1B01G420200	2.69205	3.54736	3.3711	0.231083	0.19435	0.204403	1.0418e-58	-4.05168	down	Rop guanine nucleotide exchange factor 9 GN=ROPGEF9 OS=Arabidopsis thaliana (Mouse-ear cress) PE=1 SV=1	predicted protein [Hordeum vulgare subsp. vulgare]
TraesCS1B01G433200	231.947	298.738	270.647	55.1496	32.6815	29.6691	1.57561e-31	-2.93461	down	--	unnamed protein product [Triticum aestivum]
TraesCS1B01G434100	0.1178	0.108693	0.112157	0.679447	0.571652	0.477632	1.82148e-09	2.03357	up	Subtilisin-like protease SBT3.3 {ECO:0000303|PubMed:16193095} (Precursor) OS=Arabidopsis thaliana (Mouse-ear cress) PE=2 SV=1	predicted protein [Hordeum vulgare subsp. vulgare]
TraesCS1B01G435900	2.19475	2.62538	2.39476	0.704638	0.47567	0.528101	7.47907e-22	-2.2484	down	Sugar transporter ERD6-like 6 GN=At1g75220 OS=Arabidopsis thaliana (Mouse-ear cress) PE=1 SV=1	predicted protein [Hordeum vulgare subsp. vulgare]
TraesCS1B01G440000	6.48292	9.06073	6.425	0.081883	0.049149	0.093554	1.15388e-43	-6.25255	down	Cucumber peeling cupredoxin OS=Cucumis sativus (Cucumber) PE=1 SV=3	Cucumber peeling cupredoxin [Aegilops tauschii]
TraesCS1B01G440100	17.8585	16.563	23.9263	1.10924	0.686823	0.620416	2.54388e-89	-4.75192	down	Cucumber peeling cupredoxin OS=Cucumis sativus (Cucumber) PE=1 SV=3	predicted protein [Hordeum vulgare subsp. vulgare]
TraesCS1B01G440400	1.53016	2.15884	1.94802	0.182682	0.121847	0.352202	2.26984e-17	-3.16475	down	Cation/H(+) antiporter 20 GN=CHX20 OS=Arabidopsis thaliana (Mouse-ear cress) PE=2 SV=1	Cation/H(+) antiporter 17 [Triticum urartu]
TraesCS1B01G445300	22.4251	27.9304	22.6644	5.17081	2.98171	2.59316	2.21148e-25	-2.91076	down	Mitogen-activated protein kinase 17 GN=OJ1126_B10.5 OS=Oryza sativa subsp. japonica (Rice) PE=2 SV=2	Mitogen-activated protein kinase 17 [Triticum urartu]
TraesCS1B01G446100	5.72043	6.26599	5.96672	1.58005	1.06443	0.760082	4.49769e-22	-2.56046	down	Probable isoprenylcysteine alpha-carbonyl methylesterase ICME GN=OJ1126_B10.7 OS=Oryza sativa subsp. japonica (Rice) PE=2 SV=1	predicted protein [Hordeum vulgare subsp. vulgare]
TraesCS1B01G453300	0.278139	0.251543	0.096035	1.23086	0.937959	1.04033	4.59177e-06	2.01692	up	Probable WRKY transcription factor 23 GN=WRKY23 OS=Arabidopsis thaliana (Mouse-ear cress) PE=2 SV=1	Putative WRKY transcription factor 23 [Aegilops tauschii]
TraesCS1B01G459300	4.17063	4.88955	4.75762	1.16301	0.608926	0.521332	1.32517e-19	-2.73729	down	Protein kinase GN=PHY1 OS=Ceratodon purpureus (Fire moss) PE=3 SV=3	PREDICTED: mitogen-activated protein kinase kinase kinase 7-like [Brachypodium distachyon]
TraesCS1B01G471100	23.9141	30.6481	26.8213	10.3137	6.44637	6.26597	5.70257e-17	-2.01194	down	Probable protein kinase At2g41970 GN=At2g41970 OS=Arabidopsis thaliana (Mouse-ear cress) PE=2 SV=1	predicted protein [Hordeum vulgare subsp. vulgare]
TraesCS1B01G477600	28.1476	52.3947	28.0862	12.5559	7.06456	6.13699	2.00242e-10	-2.22417	down	--	hypothetical protein TRIUR3_26883 [Triticum urartu]
TraesCS1B01G477700	34.6471	35.8423	26.5946	12.1435	4.84923	4.62566	3.97854e-10	-2.29858	down	--	hypothetical protein TRIUR3_26883 [Triticum urartu]
TraesCS1B01G477800	54.7253	85.0356	86.1185	20.8201	16.4938	15.6761	9.60941e-24	-2.27581	down	--	hypothetical protein TRIUR3_26883 [Triticum urartu]
TraesCS1B01G478000	58.8285	71.5565	70.0219	4.86933	2.47937	2.03038	1.40886e-51	-4.52524	down	Alpha carbonic anhydrase 7 (Precursor) GN=ACA7 OS=Arabidopsis thaliana (Mouse-ear cress) PE=2 SV=1	Bifunctional monodehydroascorbate reductase and carbonic anhydrase nectarin-3 [Aegilops tauschii]
TraesCS1B01G478500	11.5613	16.8469	12.1559	0.757951	0.618533	0.643695	2.40402e-73	-4.45775	down	Pathogenesis-related protein 1A (Precursor) OS=Nicotiana tabacum (Common tobacco) PE=1 SV=1	Pathogenesis-related protein 1A [Aegilops tauschii]
TraesCS1B01G479500	39.2708	48.9604	44.7863	2.18935	1.39496	1.26537	4.82723e-108	-4.9232	down	Aspartic proteinase CDR1 (Precursor) GN=CDR1 OS=Arabidopsis thaliana (Mouse-ear cress) PE=1 SV=1	Aspartic proteinase nepenthesin-2 [Aegilops tauschii]
TraesCS1B01G481200	2.28878	2.43035	2.37071	0.011846	0	0	1.84271e-40	-7.78381	down	--	hypothetical protein F775_17579 [Aegilops tauschii]
TraesCS1D01G011500	40.1837	56.1874	53.8829	5.8825	4.90709	3.30207	8.65722e-46	-3.56647	down	--	hypothetical protein F775_28945 [Aegilops tauschii]
TraesCS1D01G034600	0.343847	0.383788	0.305664	2.61385	2.07269	3.69051	1.2884e-20	2.74372	up	--	predicted protein [Hordeum vulgare subsp. vulgare]
TraesCS1D01G037600	0.820118	1.45065	1.18073	0	0	0	3.00634e-23	-7.79912	down	--	hypothetical protein SORBIDRAFT_07g020410 [Sorghum bicolor]
TraesCS1D01G043500	13.4803	10.59	17.6942	1.40055	0.545667	0.793325	1.41816e-30	-3.99946	down	--	PREDICTED: uncharacterized protein LOC101757790 [Setaria italica]
TraesCS1D01G065300	3.16196	4.24278	3.24599	0.77202	0.867629	1.2058	2.38533e-21	-2.04818	down	Alpha,alpha-trehalose-phosphate synthase [UDP-forming] 1 GN=TPS1 OS=Arabidopsis thaliana (Mouse-ear cress) PE=1 SV=1	Alpha,alpha-trehalose-phosphate synthase (UDP-forming) 1 [Aegilops tauschii]
TraesCS1D01G073700	3.33625	3.47439	2.88944	0	0.017556	0	2.19135e-30	-7.3901	down	7-deoxyloganetin glucosyltransferase GN=UGT85A24 OS=Gardenia jasminoides (Cape jasmine) PE=1 SV=1	Cytokinin-O-glucosyltransferase 2 [Aegilops tauschii]
TraesCS1D01G083100	10.8015	19.3323	13.1136	4.95436	3.12156	0.625978	0.00216408	-2.30099	down	Reticulon-like protein B1 GN=F9D16.100 OS=Arabidopsis thaliana (Mouse-ear cress) PE=1 SV=1	Reticulon-like protein B1 [Triticum urartu]
TraesCS1D01G098100	0.54532	0.151921	0.557092	1.70049	2.35087	2.96903	6.04955e-06	2.13986	up	1-aminocyclopropane-1-carboxylate oxidase GN=MAO1B OS=Musa acuminata (Banana) PE=3 SV=1	predicted protein [Hordeum vulgare subsp. vulgare]
TraesCS1D01G117300	20.4335	35.7161	21.1207	0	0.029755	0	6.60027e-60	-9.84202	down	--	predicted protein [Hordeum vulgare subsp. vulgare]
TraesCS1D01G118600	17.0351	18.7702	16.4051	4.54934	3.16654	3.19945	6.27242e-42	-2.43009	down	Boron transporter 4 GN=BOR4 OS=Arabidopsis thaliana (Mouse-ear cress) PE=2 SV=1	Boron transporter-like protein 2 [Aegilops tauschii]
TraesCS1D01G125700	213.337	291.839	246.325	40.8924	23.2095	18.8743	2.19823e-31	-3.32322	down	--	hypothetical protein F775_26488 [Aegilops tauschii]
TraesCS1D01G128700	71.8916	103.84	84.913	8.70944	4.38176	4.24507	9.68352e-44	-4.03698	down	--	hypothetical protein F775_14058 [Aegilops tauschii]
TraesCS1D01G133500	5.02406	6.31413	5.17189	0.309996	0.079597	0.068723	4.27819e-47	-5.16339	down	MOB kinase activator-like 1 GN=At4g19045 OS=Arabidopsis thaliana (Mouse-ear cress) PE=2 SV=1	PREDICTED: MOB kinase activator-like 1 [Brachypodium distachyon]
TraesCS1D01G135700	3.42162	3.72517	3.65893	0.548374	0.373864	0.305456	1.45879e-48	-3.33524	down	Probable metal-nicotianamine transporter YSL3 GN=OJ1171_H02.13 OS=Oryza sativa subsp. japonica (Rice) PE=2 SV=2	Putative metal-nicotianamine transporter YSL3 [Aegilops tauschii]
TraesCS1D01G135800	19.4458	22.6311	21.4953	1.49545	1.27986	1.18544	1.15218e-151	-3.71542	down	--	hypothetical protein F775_24993 [Aegilops tauschii]
TraesCS1D01G144300	13.8432	19.307	15.2138	1.17311	1.29	0.634223	1.19133e-50	-4.1006	down	--	hypothetical protein F775_52111 [Aegilops tauschii]
TraesCS1D01G145300	2.49004	4.32473	2.94095	0	0	0.021185	1.13575e-30	-7.58569	down	--	predicted protein [Hordeum vulgare subsp. vulgare]
TraesCS1D01G146000	14.6962	19.9698	16.317	4.06226	2.04159	2.49804	7.52901e-24	-2.72781	down	Zinc finger protein CONSTANS-LIKE 4 GN=COL4 OS=Arabidopsis thaliana (Mouse-ear cress) PE=2 SV=2	hypothetical protein F775_18365 [Aegilops tauschii]
TraesCS1D01G146600	4.83705	5.75026	2.60548	20.6692	23.0766	29.8518	3.59216e-15	2.23034	up	Cellulose synthase A catalytic subunit 7 [UDP-forming] GN=OSJNBa0006L06.10 OS=Oryza sativa subsp. japonica (Rice) PE=2 SV=1	Cellulose synthase A catalytic subunit 7 (UDP-forming) [Aegilops tauschii]
TraesCS1D01G147700	9.93121	11.3169	10.6155	0.150578	0.120279	0.062492	3.75459e-188	-6.64692	down	--	hypothetical protein F775_14638 [Aegilops tauschii]
TraesCS1D01G149700	0.057623	0	0	2.87435	1.37769	1.53589	1.2822e-14	5.2301	up	Ribonuclease 1 (Precursor) GN=RNS1 OS=Arabidopsis thaliana (Mouse-ear cress) PE=1 SV=1	Ribonuclease 1 [Aegilops tauschii]
TraesCS1D01G151900	7.14143	8.37187	7.12253	2.21164	1.69185	1.74909	8.59209e-38	-2.19323	down	Probable serine/threonine protein kinase IRE3 {ECO:0000305} OS=Arabidopsis thaliana (Mouse-ear cress) PE=2 SV=1	PREDICTED: serine/threonine-protein kinase tricorner-like isoform X2 [Brachypodium distachyon]
TraesCS1D01G163900	0.785975	1.75737	1.5503	13.817	10.9687	13.7852	5.91053e-20	2.95693	up	Non-specific lipid-transfer protein 2G (Precursor) OS=Triticum aestivum (Wheat) PE=1 SV=2	Non-specific lipid-transfer protein 2G [Aegilops tauschii]
TraesCS1D01G164000	6.84864	11.1308	14.6295	40.3745	65.4248	89.8668	6.75921e-11	2.30332	up	Non-specific lipid-transfer protein 2 (Precursor) GN=LTP-2 OS=Oryza sativa subsp. indica (Rice) PE=3 SV=2	Non-specific lipid-transfer protein 2 [Triticum urartu]
TraesCS1D01G165100	17.5543	21.0254	14.4	2.5715	1.79606	1.73636	9.31609e-44	-3.35782	down	Folylpolyglutamate synthase {ECO:0000250|UniProtKB:Q05932, ECO:0000312|EMBL:CAC80839.2} GN=K18J17.17 OS=Arabidopsis thaliana (Mouse-ear cress) PE=1 SV=1	PREDICTED: folylpolyglutamate synthase-like isoform X1 [Brachypodium distachyon]
TraesCS1D01G165900	12.247	15.0558	13.8503	0.69391	0.663016	0.357143	2.04837e-48	-4.62938	down	--	hypothetical protein F775_22151 [Aegilops tauschii]
TraesCS1D01G166000	12.7612	16.071	15.9243	5.00427	2.96462	3.30968	1.8872e-20	-2.16863	down	--	predicted protein [Hordeum vulgare subsp. vulgare]
TraesCS1D01G176400	0.100571	0.093705	0.087965	1.16645	0.571338	0.829384	9.04788e-11	2.81416	up	Cytochrome P450 84A1 GN=F23E13.110 OS=Arabidopsis thaliana (Mouse-ear cress) PE=1 SV=1	unnamed protein product [Triticum aestivum]
TraesCS1D01G193700	6.2462	8.75004	7.43402	2.13818	1.29299	1.21928	5.61429e-21	-2.42879	down	--	predicted protein [Hordeum vulgare subsp. vulgare]
TraesCS1D01G215300	2.93974	4.30697	3.31019	0.093434	0	0	3.64877e-05	-4.3295	down	Expansin-B2 (Precursor) GN=OSJNBb0014I11.2 OS=Oryza sativa subsp. japonica (Rice) PE=2 SV=2	hypothetical protein F775_28899 [Aegilops tauschii]
TraesCS1D01G215400	1.92052	1.95442	1.90338	11.2758	10.8745	6.02748	3.66863e-13	2.03996	up	Expansin-B3 (Precursor) OS=Oryza sativa subsp. japonica (Rice) PE=2 SV=2	beta-expansin TaEXPB2 [Triticum aestivum]
TraesCS1D01G224200	12.8807	16.5643	14.224	2.68721	1.99824	1.0791	2.23267e-23	-3.05701	down	Uncharacterized protein At5g39865 GN=At5g39865 OS=Arabidopsis thaliana (Mouse-ear cress) PE=2 SV=1	PREDICTED: uncharacterized protein At3g28850 [Brachypodium distachyon]
TraesCS1D01G230700	27.555	35.7538	31.277	3.3111	2.20858	2.62614	1.79653e-75	-3.70756	down	Pectinesterase inhibitor (Precursor) GN=PMEI OS=Actinidia deliciosa (Kiwi) PE=1 SV=2	Pectinesterase inhibitor [Aegilops tauschii]
TraesCS1D01G231400	37.572	58.3624	42.6494	3.24966	2.10056	1.27608	8.94115e-44	-4.46879	down	Indole-3-acetic acid-induced protein ARG2 GN=ARG2 OS=Vigna radiata var. radiata (Mung bean) PE=2 SV=1	PREDICTED: late embryogenesis abundant protein Lea5-like [Brachypodium distachyon]
TraesCS1D01G239400	9.86597	11.3156	8.6765	1.7986	0.79661	0.904321	1.12806e-25	-3.22083	down	Probable ADP-ribosylation factor GTPase-activating protein AGD11 GN=AGD11 OS=Arabidopsis thaliana (Mouse-ear cress) PE=2 SV=1	predicted protein [Hordeum vulgare subsp. vulgare]
TraesCS1D01G249700	4.27456	4.86686	9.04723	1.42271	1.14458	0.696048	1.39017e-13	-2.60442	down	Endo-1,3;1,4-beta-D-glucanase (Precursor) OS=Zea mays (Maize) PE=1 SV=1	Endo-1,3;1,4-beta-D-glucanase [Aegilops tauschii]
TraesCS1D01G253300	16.7685	11.3251	20.6261	0.978021	0.856905	0.763586	3.98356e-73	-4.37208	down	--	predicted protein [Hordeum vulgare subsp. vulgare]
TraesCS1D01G266400	1.48827	1.54429	1.36735	0.22888	0.055257	0.202241	4.09187e-17	-3.23723	down	Putative clathrin assembly protein At1g03050 GN=At1g03050 OS=Arabidopsis thaliana (Mouse-ear cress) PE=2 SV=1	Putative clathrin assembly protein [Aegilops tauschii]
TraesCS1D01G283200	2.71034	2.68612	3.0238	0.811166	0.582031	0.831143	3.02041e-15	-2.07911	down	--	hypothetical protein F775_08818 [Aegilops tauschii]
TraesCS1D01G284100	3.41791	4.51488	2.75481	1.11687	0.573161	0.663236	3.08777e-12	-2.32662	down	GATA transcription factor 16 GN=GATA16 OS=Arabidopsis thaliana (Mouse-ear cress) PE=2 SV=1	PREDICTED: putative GATA transcription factor 22 [Brachypodium distachyon]
TraesCS1D01G286800	51.3947	57.7382	58.2375	13.6595	7.69296	7.27229	4.09233e-27	-2.71542	down	Serine/threonine-protein kinase At3g07070 GN=At3g07070 OS=Arabidopsis thaliana (Mouse-ear cress) PE=2 SV=1	Serine/threonine-protein kinase PBS1 [Aegilops tauschii]
TraesCS1D01G287100	5.27131	6.26823	5.61135	0.588075	0.346526	0.375611	4.93429e-91	-4.01059	down	Protein IQ-DOMAIN 1 GN=IQD1 OS=Arabidopsis thaliana (Mouse-ear cress) PE=1 SV=1	predicted protein [Hordeum vulgare subsp. vulgare]
TraesCS1D01G289300	21.4474	26.5536	22.8089	2.78004	1.9584	1.7105	1.76758e-63	-3.5551	down	Putative respiratory burst oxidase homolog protein H GN=RBOHH OS=Arabidopsis thaliana (Mouse-ear cress) PE=3 SV=1	Putative respiratory burst oxidase-H-like protein [Aegilops tauschii]
TraesCS1D01G289600	13.1543	14.6433	12.3938	2.2803	1.34245	0.994607	8.96678e-31	-3.26441	down	--	PREDICTED: nucleoporin nup211 [Brachypodium distachyon]
TraesCS1D01G293500	4.19402	5.94864	4.91657	1.25031	0.636517	0.631538	1.12336e-19	-2.72729	down	Cation/H(+) antiporter 15 GN=CHX15 OS=Arabidopsis thaliana (Mouse-ear cress) PE=2 SV=1	PREDICTED: cation/H(+) antiporter 15-like [Brachypodium distachyon]
TraesCS1D01G301200	3.57713	5.47528	3.50952	0.778819	0.509189	0.444969	7.63257e-23	-3.06905	down	Thioredoxin H5 GN=OSJNBa0018K15.18 OS=Oryza sativa subsp. japonica (Rice) PE=2 SV=1	predicted protein [Hordeum vulgare subsp. vulgare]
TraesCS1D01G302400	3.22231	3.70364	3.50404	0.96588	0.463734	0.434172	4.08031e-17	-2.61194	down	--	hypothetical protein TRIUR3_22966 [Triticum urartu]
TraesCS1D01G303200	3.69542	5.26049	4.31167	0.934437	0.6696	0.370994	1.41097e-19	-2.87806	down	Cation/H(+) antiporter 15 GN=CHX15 OS=Arabidopsis thaliana (Mouse-ear cress) PE=2 SV=1	hypothetical protein SORBIDRAFT_09g023730 [Sorghum bicolor]
TraesCS1D01G303600	56.4817	56.8042	62.3251	11.2521	6.3714	5.7474	3.70249e-35	-3.16084	down	L-ascorbate oxidase homolog (Precursor) GN=Bp10 OS=Brassica napus (Rape) PE=2 SV=1	predicted protein [Hordeum vulgare subsp. vulgare]
TraesCS1D01G304800	2.58359	2.77888	2.67989	0.865287	0.483348	0.374703	7.70044e-39	-2.70124	down	MATE efflux family protein 1 GN=F11M15.20 OS=Arabidopsis thaliana (Mouse-ear cress) PE=2 SV=2	putative citrate efflux MATE transporter [Secale cereale]
TraesCS1D01G306200	3.80644	3.87242	4.36447	0.759154	1.48334	0.929163	4.23437e-13	-2.08167	down	Chlorophyll a-b binding protein, chloroplastic (Precursor) OS=Spinacia oleracea (Spinach) PE=1 SV=1	Chlorophyll a-b binding protein 3C, chloroplastic [Aegilops tauschii]
TraesCS1D01G312700	3.11134	4.06655	3.53173	1.06211	0.812457	0.571707	9.33912e-19	-2.29863	down	Putative xyloglucan glycosyltransferase 10 GN=P0474G09.119 OS=Oryza sativa subsp. japonica (Rice) PE=3 SV=1	hypothetical protein F775_15407 [Aegilops tauschii]
TraesCS1D01G317200	3.74557	4.95185	4.56692	0.510466	0.267368	0.372658	1.34925e-41	-3.64502	down	Serine/threonine-protein kinase CDL1 {ECO:0000305} OS=Arabidopsis thaliana (Mouse-ear cress) PE=1 SV=1	Serine/threonine-protein kinase PBS1 [Aegilops tauschii]
TraesCS1D01G320200	3.48919	4.58951	4.48304	1.08769	0.712768	0.597844	1.38456e-22	-2.55357	down	Probable potassium transporter 3 OS=Oryza sativa subsp. japonica (Rice) PE=2 SV=1	PREDICTED: probable potassium transporter 3 [Brachypodium distachyon]
TraesCS1D01G344800	98.8461	124.221	105.2	40.8369	23.4821	22.047	5.01958e-17	-2.09361	down	Soluble inorganic pyrophosphatase GN=IPP OS=Zea mays (Maize) PE=2 SV=1	PREDICTED: soluble inorganic pyrophosphatase-like [Brachypodium distachyon]
TraesCS1D01G348900	24.4392	27.0757	26.0756	2.64318	1.3723	1.47824	4.21089e-54	-3.99584	down	Alpha-glucan water dikinase, chloroplastic (Precursor) GN=R1 OS=Solanum tuberosum (Potato) PE=1 SV=2	hypothetical protein F775_52627 [Aegilops tauschii]
TraesCS1D01G353800	0.172446	0.648689	0.280582	3.23562	1.82771	2.72176	5.14121e-06	2.40669	up	--	hypothetical protein SORBIDRAFT_09g026480 [Sorghum bicolor]
TraesCS1D01G357000	24.6255	32.0469	28.599	11.1904	6.59426	5.80635	1.49161e-14	-2.0153	down	Glycerophosphodiester phosphodiesterase GDPDL7 {ECO:0000305} (Precursor) OS=Arabidopsis thaliana (Mouse-ear cress) PE=2 SV=1	Putative glycerophosphoryl diester phosphodiesterase 3 [Aegilops tauschii]
TraesCS1D01G357100	5.94454	4.92471	5.8068	1.03346	0.465946	0.383653	2.89105e-19	-3.22023	down	NADH dehydrogenase [ubiquinone] iron-sulfur protein 7, mitochondrial (Precursor) OS=Brassica oleracea (Wild cabbage) PE=2 SV=1	predicted protein [Hordeum vulgare subsp. vulgare]
TraesCS1D01G363400	1.84036	1.97306	2.20628	0.761663	0.265494	0.390436	1.34435e-19	-2.26683	down	Myosin-17 GN=F7C8.80 OS=Arabidopsis thaliana (Mouse-ear cress) PE=1 SV=2	Myosin-J heavy chain [Aegilops tauschii]
TraesCS1D01G368500	0.849471	0.977632	1.59489	0.049989	0.013364	0.083892	2.44215e-15	-4.19	down	--	--
TraesCS1D01G370400	0.29787	0.482323	0.427347	0.08049	0.017987	0.076886	5.97966e-09	-2.76991	down	Putative disease resistance protein RGA1 GN=RGA1 OS=Solanum bulbocastanum (Wild potato) PE=2 SV=2	Putative disease resistance protein RGA3 [Aegilops tauschii]
TraesCS1D01G371400	0.736201	0.873073	0.46139	3.05178	3.20269	3.67112	3.21629e-13	2.00099	up	Myb-related protein Hv33 GN=MYB2 OS=Hordeum vulgare (Barley) PE=2 SV=3	Myb-related protein Hv33 [Aegilops tauschii]
TraesCS1D01G371500	0.103384	0.136515	0.070765	0.711355	1.13603	1.35588	4.58935e-11	2.92155	up	Myb-related protein Hv33 GN=MYB2 OS=Hordeum vulgare (Barley) PE=2 SV=3	Myb-related protein Hv33 [Aegilops tauschii]
TraesCS1D01G372800	0.077135	0.150608	0.227425	0.875641	0.92123	1.14918	6.17765e-08	2.36776	up	Mitogen-activated protein kinase kinase kinase NPK1 GN=NPK1 OS=Nicotiana tabacum (Common tobacco) PE=1 SV=1	predicted protein [Hordeum vulgare subsp. vulgare]
TraesCS1D01G376500	0.080396	0.061896	0.841629	1.72293	2.61196	3.03289	0.00282205	2.32889	up	Ethylene-responsive transcription factor ERF109 GN=ERF109 OS=Arabidopsis thaliana (Mouse-ear cress) PE=1 SV=1	Ethylene-responsive transcription factor ERF109 [Aegilops tauschii]
TraesCS1D01G376600	1.04078	1.56194	1.97485	7.41678	6.08169	9.99962	6.45712e-12	2.10276	up	Ethylene-responsive transcription factor ERF109 GN=ERF109 OS=Arabidopsis thaliana (Mouse-ear cress) PE=1 SV=1	ethylene responsive transcription factor 6 [Triticum turgidum subsp. durum]
TraesCS1D01G376800	0.307619	0.743889	0.972097	5.67866	3.37078	5.41744	2.49298e-09	2.51994	up	Ethylene-responsive transcription factor ERF109 GN=ERF109 OS=Arabidopsis thaliana (Mouse-ear cress) PE=1 SV=1	predicted protein [Hordeum vulgare subsp. vulgare]
TraesCS1D01G389700	0.652471	0.668294	0.593953	0	0	0	1.26327e-16	-6.82264	down	--	hypothetical protein TRIUR3_17553 [Triticum urartu]
TraesCS1D01G390900	531.406	745.249	607.581	211.375	118.026	110.34	9.3646e-17	-2.27008	down	Fruit bromelain (Precursor) OS=Ananas comosus (Pineapple) PE=1 SV=1	Fruit bromelain [Aegilops tauschii]
TraesCS1D01G393900	0.984479	0.894674	0.382726	3.31821	4.45186	5.22751	2.37613e-10	2.23833	up	Probable purine permease 4 GN=PUP4 OS=Arabidopsis thaliana (Mouse-ear cress) PE=2 SV=1	predicted protein [Hordeum vulgare subsp. vulgare]
TraesCS1D01G394100	2.16279	3.39602	1.21864	13.1253	21.256	23.0374	3.77164e-15	2.78688	up	Probable purine permease 4 GN=PUP4 OS=Arabidopsis thaliana (Mouse-ear cress) PE=2 SV=1	predicted protein [Hordeum vulgare subsp. vulgare]
TraesCS1D01G400200	2.46586	2.13875	2.11203	0.073792	0.058739	0.054205	1.58391e-58	-5.05436	down	Rop guanine nucleotide exchange factor 9 GN=ROPGEF9 OS=Arabidopsis thaliana (Mouse-ear cress) PE=1 SV=1	predicted protein [Hordeum vulgare subsp. vulgare]
TraesCS1D01G400700	2.06921	3.17326	2.41979	0.768392	0.456385	0.433365	8.8111e-13	-2.35393	down	Gibberellin 2-beta-dioxygenase GN=GA2OX1 OS=Phaseolus coccineus (Scarlet runner bean) PE=2 SV=1	PREDICTED: gibberellin 2-beta-dioxygenase-like [Oryza brachyantha]
TraesCS1D01G400800	5.30892	7.25109	5.60907	1.63976	0.9365	0.84293	6.25238e-18	-2.55847	down	Gibberellin 2-beta-dioxygenase GN=GA2OX1 OS=Phaseolus coccineus (Scarlet runner bean) PE=2 SV=1	PREDICTED: gibberellin 2-beta-dioxygenase-like [Oryza brachyantha]
TraesCS1D01G403100	0	0	0.019057	0.764445	1.05082	0.870163	1.81408e-17	5.65776	up	Cytochrome P450 71D7 GN=CYP71D7 OS=Solanum chacoense (Chaco potato) PE=3 SV=1	predicted protein [Hordeum vulgare subsp. vulgare]
TraesCS1D01G411500	249.222	323.774	299.917	73.0905	38.1849	36.4106	2.33187e-22	-2.72216	down	--	hypothetical protein F775_32432 [Aegilops tauschii]
TraesCS1D01G417400	3.92099	5.4702	4.83686	0.240317	0.167577	0.041141	3.91963e-31	-4.88966	down	Cucumber peeling cupredoxin OS=Cucumis sativus (Cucumber) PE=1 SV=3	Cucumber peeling cupredoxin [Aegilops tauschii]
TraesCS1D01G417500	24.282	17.164	27.6525	2.77518	0.997635	0.656581	8.79429e-29	-4.11755	down	Cucumber peeling cupredoxin OS=Cucumis sativus (Cucumber) PE=1 SV=3	predicted protein [Hordeum vulgare subsp. vulgare]
TraesCS1D01G422800	22.2973	25.2459	21.7251	5.15574	3.88638	3.25859	6.07775e-42	-2.67763	down	Mitogen-activated protein kinase 17 GN=OJ1126_B10.5 OS=Oryza sativa subsp. japonica (Rice) PE=2 SV=2	Mitogen-activated protein kinase 17 [Triticum urartu]
TraesCS1D01G426600	0.59371	1.0311	0.912022	0.226512	0.212183	0.210128	4.30593e-09	-2.10502	down	Reticuline oxidase (Precursor) GN=BBE1 OS=Papaver somniferum (Opium poppy) PE=3 SV=1	PREDICTED: reticuline oxidase-like [Brachypodium distachyon]
TraesCS1D01G433900	3.63354	4.42383	4.09561	0.568995	0.261939	0.293874	4.66898e-34	-3.56368	down	Protein kinase GN=PHY1 OS=Ceratodon purpureus (Fire moss) PE=3 SV=3	PREDICTED: mitogen-activated protein kinase kinase kinase 7-like [Brachypodium distachyon]
TraesCS1D01G452000	5.73246	8.75694	6.07512	0.234082	0.130309	0.204644	5.04858e-51	-5.16385	down	Pathogenesis-related protein 1A (Precursor) OS=Nicotiana tabacum (Common tobacco) PE=1 SV=1	Pathogenesis-related protein 1A [Aegilops tauschii]
TraesCS1D01G452800	3.0792	4.43707	4.04515	0.267102	0.203587	0.239671	4.98567e-56	-4.14472	down	Aspartic proteinase CDR1 (Precursor) GN=CDR1 OS=Arabidopsis thaliana (Mouse-ear cress) PE=1 SV=1	Aspartic proteinase nepenthesin-2 [Aegilops tauschii]
TraesCS2A01G000100	8.52592	7.50911	7.11573	0.400206	1.55976	0.547726	2.98687e-137	-3.88321	down	Polycomb group protein EMBRYONIC FLOWER 2 GN=MWD22.18/MWD22.19 OS=Arabidopsis thaliana (Mouse-ear cress) PE=1 SV=2	Polycomb group protein EMBRYONIC FLOWER 2 [Triticum urartu]
TraesCS2A01G000200	2.14111	2.17183	2.27702	0.695483	0.546965	0.55113	2.86439e-31	-2.10872	down	Protein EIN4 GN=EIN4 OS=Arabidopsis thaliana (Mouse-ear cress) PE=1 SV=1	Protein EIN4 [Aegilops tauschii]
TraesCS2A01G000600	2.87816	1.67838	3.6232	0	0	0	3.6927e-23	-7.8186	down	Probable NAD(P)H-dependent oxidoreductase 1 OS=Oryza sativa subsp. japonica (Rice) PE=1 SV=1	Putative NAD(P)H-dependent oxidoreductase 1 [Aegilops tauschii]
TraesCS2A01G000700	7.12202	7.01914	7.74056	0.502511	0.405256	0.415184	7.91679e-145	-4.47058	down	--	PREDICTED: uncharacterized protein LOC100843116 isoform X2 [Brachypodium distachyon]
TraesCS2A01G000900	1.05158	0.689634	0.727126	0	0.066951	0.058922	2.54536e-13	-4.05637	down	AT-rich interactive domain-containing protein 2 GN=ARID2 OS=Arabidopsis thaliana (Mouse-ear cress) PE=2 SV=1	hypothetical protein F775_04400 [Aegilops tauschii]
TraesCS2A01G001100	7.96991	8.45279	8.85765	0	0	0	6.93658e-37	-9.18202	down	--	hypothetical protein TRIUR3_06475 [Triticum urartu]
TraesCS2A01G001200	9.26485	10.273	9.54679	0	0	0	3.68695e-46	-9.96896	down	--	hypothetical protein TRIUR3_06474 [Triticum urartu]
TraesCS2A01G001800	100.201	139.436	122.433	0	0	0	5.65945e-76	-12.02	down	--	hypothetical protein TRIUR3_30059 [Triticum urartu]
TraesCS2A01G001900	12.5335	18.6124	15.8697	0.010869	0.046492	0.021464	7.16123e-55	-8.20614	down	--	hypothetical protein TRIUR3_18218 [Triticum urartu]
TraesCS2A01G002000	136.45	201.546	216.387	0.011143	0.011916	0.033228	4.42473e-114	-11.6873	down	--	hypothetical protein F775_27275 [Aegilops tauschii]
TraesCS2A01G002500	4.06976	3.82597	4.32457	0	0	0	5.94888e-45	-9.87418	down	Polycomb group protein EMBRYONIC FLOWER 2 GN=MWD22.18/MWD22.19 OS=Arabidopsis thaliana (Mouse-ear cress) PE=1 SV=2	predicted protein [Hordeum vulgare subsp. vulgare]
TraesCS2A01G004300	1.91446	1.43521	1.41505	0	0	0	1.48198e-39	-9.44329	down	Disease resistance RPP13-like protein 4 GN=RPP13L4 OS=Arabidopsis thaliana (Mouse-ear cress) PE=2 SV=2	Disease resistance RPP13-like protein 4 [Triticum urartu]
TraesCS2A01G004500	17.6332	21.8184	20.3386	3.19129	1.65388	2.3918	9.26772e-41	-3.21128	down	Alkane hydroxylase MAH1 {ECO:0000303|PubMed:17905869} OS=Arabidopsis thaliana (Mouse-ear cress) PE=2 SV=1	Cytochrome P450 86B1 [Triticum urartu]
TraesCS2A01G004700	3.15924	3.18736	2.63549	1.00468	0.48386	0.463167	4.92747e-22	-2.8112	down	Septin and tuftelin-interacting protein 1 homolog 2 GN=STIPL2 OS=Arabidopsis thaliana (Mouse-ear cress) PE=2 SV=1	G patch domain-containing protein 8 [Triticum urartu]
TraesCS2A01G004800	3.59477	3.69077	3.00364	0.522411	0.439315	0.653796	5.51993e-40	-2.78484	down	--	predicted protein [Hordeum vulgare subsp. vulgare]
TraesCS2A01G004900	1.00826	0.936613	0.566652	0.003765	0.006039	0.037844	4.77381e-28	-4.97432	down	Disease resistance protein RGA2 GN=RGA2 OS=Solanum bulbocastanum (Wild potato) PE=1 SV=1	Disease resistance protein RGA2 [Triticum urartu]
TraesCS2A01G005000	5.65273	4.86622	4.91435	0.27958	0.30522	0.319882	2.97849e-219	-4.27342	down	Histone-lysine N-methyltransferase ASHH2 GN=T14N5.15 OS=Arabidopsis thaliana (Mouse-ear cress) PE=1 SV=1	Histone-lysine N-methyltransferase ASHH2 [Aegilops tauschii]
TraesCS2A01G007000	0.36826	0.306245	0.219368	0.017921	0	0.014898	6.0936e-17	-4.49057	down	Putative disease resistance RPP13-like protein 1 GN=RPPL1 OS=Arabidopsis thaliana (Mouse-ear cress) PE=3 SV=1	Putative disease resistance protein RGA3 [Triticum urartu]
TraesCS2A01G007200	1.97218	2.3736	1.48205	0	0.019241	0.029533	1.43196e-36	-6.04807	down	--	predicted protein [Hordeum vulgare subsp. vulgare]
TraesCS2A01G007300	52.0854	60.101	54.124	0	0	0	1.64087e-57	-10.8136	down	--	PREDICTED: uncharacterized protein LOC100822706 [Brachypodium distachyon]
TraesCS2A01G007800	8.00291	6.82612	6.12817	0.102394	0.070865	0.033682	1.4931e-114	-6.68231	down	tRNA-dihydrouridine(47) synthase [NAD(P)(+)]-like OS=Oryza sativa subsp. japonica (Rice) PE=2 SV=2	tRNA-dihydrouridine synthase 3-like protein [Aegilops tauschii]
TraesCS2A01G007900	31.82	11.8502	31.1668	0.762877	0.556789	0.495684	6.12371e-40	-5.39716	down	Peptidyl-prolyl cis-trans isomerase Pin1 GN=PIN1 OS=Malus domestica (Apple) PE=2 SV=1	Peptidyl-prolyl cis-trans isomerase 1 [Aegilops tauschii]
TraesCS2A01G010100	31.6283	32.3013	37.3158	0	0.02768	0	1.91754e-97	-10.5953	down	Pyruvate dehydrogenase E1 component subunit alpha-3, chloroplastic (Precursor) OS=Oryza sativa subsp. japonica (Rice) PE=2 SV=2	Pyruvate dehydrogenase E1 component subunit alpha [Aegilops tauschii]
TraesCS2A01G010200	11.148	10.4616	11.1962	0	0	0	8.54197e-52	-10.3929	down	--	hypothetical protein F775_30865 [Aegilops tauschii]
TraesCS2A01G010600	0.66802	0.846931	0.578679	0	0	0	1.02631e-20	-7.43458	down	Mediator of RNA polymerase II transcription subunit 15a GN=F7H2.12 OS=Arabidopsis thaliana (Mouse-ear cress) PE=1 SV=1	hypothetical protein F775_17399 [Aegilops tauschii]
TraesCS2A01G011100	1.87992	2.48411	1.78194	0	0	0	4.58013e-24	-7.86072	down	--	TOM1-like protein 2 [Triticum urartu]
TraesCS2A01G011300	6.51932	6.99889	6.51804	0	0.007754	0	1.44486e-41	-8.90227	down	--	hypothetical protein F775_27317 [Aegilops tauschii]
TraesCS2A01G011400	5.51993	6.0623	5.53676	0.079451	0.087159	0.025595	3.44557e-129	-6.52152	down	30-kDa cleavage and polyadenylation specificity factor 30 {ECO:0000303|PubMed:18479511} OS=Arabidopsis thaliana (Mouse-ear cress) PE=1 SV=1	hypothetical protein TRIUR3_16816 [Triticum urartu]
TraesCS2A01G011600	1.24172	0.945614	1.34226	0	0	0	8.63519e-19	-7.16135	down	Werner Syndrome-like exonuclease GN=F18A5.260 OS=Arabidopsis thaliana (Mouse-ear cress) PE=1 SV=1	Werner syndrome ATP-dependent helicase [Aegilops tauschii]
TraesCS2A01G011700	6.1992	6.11037	4.87617	0	0	0	3.16413e-28	-8.32562	down	--	hypothetical protein TRIUR3_00561 [Triticum urartu]
TraesCS2A01G012000	4.6952	4.98179	4.49708	0	0	0	1.43847e-31	-8.6634	down	--	hypothetical protein TRIUR3_00562 [Triticum urartu]
TraesCS2A01G012200	13.3852	11.304	12.1712	2.09853	1.81109	1.6785	1.31565e-169	-2.97631	down	Protein transport protein Sec24-like At3g07100 GN=At3g07100 OS=Arabidopsis thaliana (Mouse-ear cress) PE=2 SV=2	PREDICTED: protein transport protein Sec24-like At3g07100 [Brachypodium distachyon]
TraesCS2A01G012600	6.52706	5.4224	5.19734	0.008633	0.054486	0	1.66513e-12	-6.19624	down	Sterol 3-beta-glucosyltransferase UGT80A2 GN=UGT80A2 OS=Arabidopsis thaliana (Mouse-ear cress) PE=1 SV=1	predicted protein [Hordeum vulgare subsp. vulgare]
TraesCS2A01G012800	1.18602	1.18888	0.737178	0.09164	0.121813	0.063389	6.98892e-17	-3.28783	down	--	predicted protein [Hordeum vulgare subsp. vulgare]
TraesCS2A01G014200	5.80889	6.79894	5.68073	0.497976	0.444262	0.517027	9.51885e-105	-3.8178	down	--	predicted protein [Hordeum vulgare subsp. vulgare]
TraesCS2A01G014300	16.2213	16.5762	10.8426	0	0	0	1.35309e-48	-10.1564	down	CBS domain-containing protein CBSX1, chloroplastic (Precursor) OS=Arabidopsis thaliana (Mouse-ear cress) PE=1 SV=2	predicted protein [Hordeum vulgare subsp. vulgare]
TraesCS2A01G016400	3.01444	2.57286	2.47799	0	0	0.024769	2.02074e-08	-5.53943	down	--	hypothetical protein TRIUR3_15523 [Triticum urartu]
TraesCS2A01G016500	12.4457	12.0514	8.10332	0	0	0	3.07249e-47	-10.1169	down	Probable pectate lyase 15 (Precursor) GN=At4g13710 OS=Arabidopsis thaliana (Mouse-ear cress) PE=2 SV=1	predicted protein [Hordeum vulgare subsp. vulgare]
TraesCS2A01G017000	1.17383	1.22928	0.906139	0	0	0.015259	5.95854e-22	-6.53387	down	--	hypothetical protein TRIUR3_27632 [Triticum urartu]
TraesCS2A01G017100	9.91298	9.82904	9.03802	0	0.055983	0	2.82516e-09	-5.80433	down	--	hypothetical protein F775_29961 [Aegilops tauschii]
TraesCS2A01G017200	2.41089	2.08582	2.07968	0	0	0	3.23453e-37	-9.20985	down	Alanine--tRNA ligase {ECO:0000255|HAMAP-Rule:MF_03133} (Precursor) GN=F14I3.17 OS=Arabidopsis thaliana (Mouse-ear cress) PE=1 SV=3	Alanyl-tRNA synthetase [Triticum urartu]
TraesCS2A01G017500	1.38375	0.991061	0.66604	0.042919	0.010241	0.389106	4.55031e-22	-4.80315	down	Dihydrolipoyllysine-residue acetyltransferase component 3 of pyruvate dehydrogenase complex, mitochondrial (Precursor) GN=At1g54220 OS=Arabidopsis thaliana (Mouse-ear cress) PE=2 SV=1	Alanyl-tRNA synthetase [Triticum urartu]
TraesCS2A01G017600	9.53275	8.39451	8.85272	0	0	0	1.05577e-48	-10.1637	down	--	hypothetical protein TRIUR3_32132 [Triticum urartu]
TraesCS2A01G022000	7.93945	8.02548	8.46547	0.295008	0.104112	0.111721	1.34803e-81	-5.62817	down	Formamidopyrimidine-DNA glycosylase GN=F6D8.28 OS=Arabidopsis thaliana (Mouse-ear cress) PE=1 SV=1	predicted protein [Hordeum vulgare subsp. vulgare]
TraesCS2A01G022100	14.5697	15.8347	13.8583	0.079855	0.117591	0.055205	1.10534e-242	-7.52172	down	E3 ubiquitin-protein ligase MBR2 GN=MBR2 OS=Arabidopsis thaliana (Mouse-ear cress) PE=1 SV=1	E3 ubiquitin ligase BIG BROTHER-related protein [Triticum urartu]
TraesCS2A01G022200	1.18467	0.90774	1.092	0	0	0	5.19672e-21	-7.45763	down	CDT1-like protein a, chloroplastic (Precursor) GN=CDT1A OS=Arabidopsis thaliana (Mouse-ear cress) PE=1 SV=1	hypothetical protein TRIUR3_08404 [Triticum urartu]
TraesCS2A01G022700	4.66397	5.41841	4.40141	0	0	0	2.48747e-29	-8.44593	down	--	ATP-dependent Clp protease adapter protein clpS [Aegilops tauschii]
TraesCS2A01G023400	1.81698	1.75446	1.77031	0.424425	0.516137	0.430354	9.19518e-44	-2.13716	down	Putative disease resistance protein RGA4 GN=RGA4 OS=Solanum bulbocastanum (Wild potato) PE=2 SV=1	Disease resistance RPP13-like protein 4 [Triticum urartu]
TraesCS2A01G025300	3.31765	3.39457	3.61665	1.00966	1.25233	1.23523	5.65651e-62	-2.21832	down	--	predicted protein [Hordeum vulgare subsp. vulgare]
TraesCS2A01G025400	1.884	2.0306	2.11761	0	0	0.02081	1.10842e-41	-7.51094	down	Subtilisin-like protease SDD1 {ECO:0000303|PubMed:10809670} (Precursor) OS=Arabidopsis thaliana (Mouse-ear cress) PE=2 SV=1	PREDICTED: subtilisin-like protease [Brachypodium distachyon]
TraesCS2A01G026700	3.29898	3.81609	3.51822	0	0	0	2.15259e-29	-8.44439	down	1-aminocyclopropane-1-carboxylate oxidase homolog 1 GN=At1g06620 OS=Arabidopsis thaliana (Mouse-ear cress) PE=2 SV=1	1-aminocyclopropane-1-carboxylate oxidase-1-like protein [Aegilops tauschii]
TraesCS2A01G026900	47.0301	51.8804	50.6541	1.01723	0.964385	0.830863	1.25635e-216	-5.87108	down	--	predicted protein [Hordeum vulgare subsp. vulgare]
TraesCS2A01G027000	3.86809	3.8017	3.47703	0	0.00858	0	5.67772e-44	-8.51756	down	Actin-related protein 9 GN=ARP9 OS=Oryza sativa subsp. indica (Rice) PE=3 SV=2	PREDICTED: actin-related protein 9 [Brachypodium distachyon]
TraesCS2A01G028500	0.927759	1.45389	0.909528	0	0	0	5.39253e-19	-7.21944	down	7-deoxyloganetin glucosyltransferase GN=UGT85A24 OS=Gardenia jasminoides (Cape jasmine) PE=1 SV=1	Cytokinin-O-glucosyltransferase 2 [Aegilops tauschii]
TraesCS2A01G028800	1.94327	1.61653	2.04937	0.038567	0.010842	0.031141	3.07051e-61	-5.68067	down	ABC transporter B family member 25, mitochondrial (Precursor) GN=MCK7.14 OS=Arabidopsis thaliana (Mouse-ear cress) PE=1 SV=1	predicted protein [Hordeum vulgare subsp. vulgare]
TraesCS2A01G029800	2.99069	2.5522	2.47054	0	0	0.003807	6.1642e-48	-8.83595	down	Putative disease resistance RPP13-like protein 1 GN=RPPL1 OS=Arabidopsis thaliana (Mouse-ear cress) PE=3 SV=1	Putative disease resistance RPP13-like protein 1 [Triticum urartu]
TraesCS2A01G030000	0.458168	0.641016	1.41859	0	0	0.002506	2.9834e-22	-7.33603	down	Putative disease resistance RPP13-like protein 1 GN=RPPL1 OS=Arabidopsis thaliana (Mouse-ear cress) PE=3 SV=1	Vrga1 [Aegilops ventricosa]
TraesCS2A01G030100	0.832	0.785282	0.811849	0	0	0	6.48373e-18	-7.01499	down	--	hypothetical protein TRIUR3_27938 [Triticum urartu]
TraesCS2A01G030200	1.85888	1.75723	1.91231	0.008933	0.015523	0	1.06419e-48	-7.30243	down	Putative disease resistance protein At3g14460 GN=At3g14460 OS=Arabidopsis thaliana (Mouse-ear cress) PE=3 SV=1	Putative disease resistance RPP13-like protein 1 [Triticum urartu]
TraesCS2A01G031000	1.55884	1.08873	1.24741	0	0	0	6.10007e-30	-8.52267	down	Putative disease resistance protein At3g14460 GN=At3g14460 OS=Arabidopsis thaliana (Mouse-ear cress) PE=3 SV=1	Putative disease resistance RPP13-like protein 1 [Triticum urartu]
TraesCS2A01G032500	3.47548	3.25723	2.58111	0	0	0	6.48664e-29	-8.40548	down	ATP sulfurylase 2 (Precursor) GN=F6F9.2 OS=Arabidopsis thaliana (Mouse-ear cress) PE=1 SV=1	predicted protein [Hordeum vulgare subsp. vulgare]
TraesCS2A01G032600	8.2126	7.15898	7.00967	0.070787	0.089586	0.046719	3.04958e-124	-6.46687	down	--	predicted protein [Hordeum vulgare subsp. vulgare]
TraesCS2A01G032800	6.72083	7.22324	7.25034	0	0	0	3.44536e-25	-7.96962	down	--	predicted protein [Hordeum vulgare subsp. vulgare]
TraesCS2A01G033300	2.76371	2.18388	2.69733	0	0	0	1.56424e-25	-8.00697	down	--	predicted protein [Hordeum vulgare subsp. vulgare]
TraesCS2A01G033500	3.32991	3.68326	3.03437	0	0	0	1.94027e-25	-8.00458	down	Nicotianamine synthase-like 5 protein GN=NAS5 OS=Hordeum vulgare (Barley) PE=1 SV=1	Nicotianamine synthase-like 5 protein [Triticum urartu]
TraesCS2A01G033700	15.7615	7.357	9.0134	0.003864	0.13077	0.132499	3.19109e-09	-5.25963	down	Heat shock protein 82 GN=HSP82 OS=Zea mays (Maize) PE=3 SV=1	heat shock protein 90 [Triticum aestivum]
TraesCS2A01G033800	3.03184	1.65579	2.27791	0	0	0.044125	5.20256e-23	-6.18989	down	--	predicted protein [Hordeum vulgare subsp. vulgare]
TraesCS2A01G034800	4.76659	4.92009	4.15379	0.021173	0	0.037209	1.27951e-48	-7.33431	down	Glyoxylate/hydroxypyruvate reductase HPR3 GN=HPR3 OS=Arabidopsis thaliana (Mouse-ear cress) PE=2 SV=1	predicted protein [Hordeum vulgare subsp. vulgare]
TraesCS2A01G035000	2.0897	1.71268	2.50929	0	0	0	8.67667e-23	-7.69492	down	Glyoxylate/hydroxypyruvate reductase HPR3 GN=HPR3 OS=Arabidopsis thaliana (Mouse-ear cress) PE=2 SV=1	B0616E02-H0507E05.10 [Oryza sativa Indica Group]
TraesCS2A01G035100	12.9646	4.29994	16.6043	0	0	0	3.97267e-25	-8.20157	down	Calvin cycle protein CP12-2, chloroplastic (Precursor) GN=CP12-2 OS=Arabidopsis thaliana (Mouse-ear cress) PE=1 SV=1	predicted protein [Hordeum vulgare subsp. vulgare]
TraesCS2A01G035200	1.72806	2.15065	2.08206	0	0.006897	0	7.34277e-34	-7.7352	down	--	PREDICTED: LOW QUALITY PROTEIN: actin cytoskeleton-regulatory complex protein pan1 [Brachypodium distachyon]
TraesCS2A01G035300	10.5169	8.10485	5.47095	0	0.011593	0	7.98499e-45	-8.81336	down	Chalcone synthase 2 GN=CHS2 OS=Secale cereale (Rye) PE=2 SV=1	RecName: Full=Chalcone synthase 2; AltName: Full=Naringenin-chalcone synthase 2 [Secale cereale]
TraesCS2A01G035400	1.35582	1.02339	1.51298	0	0	0	4.00578e-18	-7.06491	down	Glyoxylate/hydroxypyruvate reductase HPR3 GN=HPR3 OS=Arabidopsis thaliana (Mouse-ear cress) PE=2 SV=1	predicted protein [Hordeum vulgare subsp. vulgare]
TraesCS2A01G035700	1.68028	1.38834	1.47936	0	0	0	2.52409e-21	-7.4934	down	Arginase 1, mitochondrial (Precursor) OS=Oryza sativa subsp. indica (Rice) PE=1 SV=1	arginase protein [Triticum aestivum]
TraesCS2A01G035900	8.32698	9.28334	7.82693	0	0	0	1.87596e-46	-9.99926	down	Uncharacterized acetyltransferase At3g50280 GN=At3g50280 OS=Arabidopsis thaliana (Mouse-ear cress) PE=3 SV=1	Putative acetyltransferase [Aegilops tauschii]
TraesCS2A01G036300	13.3204	11.799	13.4698	0.007665	0	0	3.57266e-65	-9.96207	down	Acetyl-CoA acetyltransferase, cytosolic 1 GN=MIF21.12 OS=Arabidopsis thaliana (Mouse-ear cress) PE=2 SV=1	PREDICTED: acetyl-CoA acetyltransferase, cytosolic 1-like [Brachypodium distachyon]
TraesCS2A01G036400	9.83148	11.4493	4.5503	0.009016	0.009641	0	5.41802e-49	-8.61809	down	UNC93-like protein 2 GN=At1g18010 OS=Arabidopsis thaliana (Mouse-ear cress) PE=2 SV=2	hypothetical protein TRIUR3_01664 [Triticum urartu]
TraesCS2A01G036500	7.38513	7.6705	6.76238	0.01205	0.013241	0.0242	7.06169e-68	-8.08036	down	Probable UMP/CMP kinase 2 GN=OSJNBb0004G23.5 OS=Oryza sativa subsp. japonica (Rice) PE=2 SV=3	predicted protein [Hordeum vulgare subsp. vulgare]
TraesCS2A01G036700	1.39314	1.15609	1.67494	0	0	0	2.97101e-25	-8.00427	down	Putative serpin-Z5 OS=Oryza sativa subsp. japonica (Rice) PE=3 SV=1	Putative serpin-Z5 [Aegilops tauschii]
TraesCS2A01G037000	4.59207	3.98274	3.60683	0	0	0	9.70873e-29	-8.37848	down	--	unnamed protein product [Triticum aestivum]
TraesCS2A01G037200	10.7587	13.0087	13.602	0.159574	0.029814	0	1.21856e-09	-5.54401	down	--	predicted protein [Hordeum vulgare subsp. vulgare]
TraesCS2A01G037400	39.5519	41.3417	39.9161	0.932039	1.38672	1.38196	1.53678e-156	-5.17615	down	Probable protein Pop3 GN=At3g17210 OS=Arabidopsis thaliana (Mouse-ear cress) PE=1 SV=1	hypothetical protein F775_27368 [Aegilops tauschii]
TraesCS2A01G037800	15.4835	13.4389	13.3499	0.651306	0.487823	0.602292	2.14515e-242	-4.77499	down	Cullin-associated NEDD8-dissociated protein 1 GN=T8K22.14 OS=Arabidopsis thaliana (Mouse-ear cress) PE=1 SV=1	predicted protein [Hordeum vulgare subsp. vulgare]
TraesCS2A01G038000	2.2602	2.8401	2.46388	0	0	0	6.40577e-24	-7.82959	down	--	hypothetical protein F775_19922 [Aegilops tauschii]
TraesCS2A01G038900	1.46963	0.977087	0.989083	0	0	0	2.29064e-19	-7.25537	down	--	hypothetical protein F775_24647 [Aegilops tauschii]
TraesCS2A01G039300	4.69343	5.38934	3.95468	0.070895	0.065997	0.218684	6.62465e-51	-5.27903	down	Probable E3 ubiquitin ligase SUD1 GN=F28A23.140 OS=Arabidopsis thaliana (Mouse-ear cress) PE=1 SV=1	predicted protein [Hordeum vulgare subsp. vulgare]
TraesCS2A01G039400	2.82332	3.38602	2.28821	0	0	0	3.21788e-24	-7.87663	down	Beta-glucosidase 16 (Precursor) OS=Oryza sativa subsp. japonica (Rice) PE=3 SV=2	Beta-glucosidase 1 [Aegilops tauschii]
TraesCS2A01G039500	2.51519	1.96129	2.18886	0.173466	0.05267	0.242085	7.71433e-23	-3.85581	down	Probable histone acetyltransferase HAC-like 3 OS=Oryza sativa subsp. japonica (Rice) PE=2 SV=2	unnamed protein product [Triticum aestivum]
TraesCS2A01G039700	1.14698	1.34462	0.871941	0	0	0	1.63052e-17	-6.98152	down	Uncharacterized protein At4g15970 GN=At4g15970 OS=Arabidopsis thaliana (Mouse-ear cress) PE=2 SV=1	hypothetical protein TRIUR3_02244 [Triticum urartu]
TraesCS2A01G040100	38.0701	38.2838	38.0997	0.011693	0.007836	0.037274	8.60992e-113	-10.3314	down	--	predicted protein [Hordeum vulgare subsp. vulgare]
TraesCS2A01G040200	19.1917	17.6972	19.7085	0.021911	0.012985	0.040233	7.26914e-115	-8.95162	down	--	hypothetical protein F775_32020 [Aegilops tauschii]
TraesCS2A01G040300	1.67848	2.25938	2.39672	0	0.0179	0	2.06073e-29	-6.98926	down	Probable glucuronosyltransferase Os04g0103100 OS=Oryza sativa subsp. japonica (Rice) PE=2 SV=2	predicted protein [Hordeum vulgare subsp. vulgare]
TraesCS2A01G041100	33.3304	32.74	23.2076	0.316196	0.05092	0.096132	5.26825e-26	-6.8696	down	Dihydrolipoyllysine-residue succinyltransferase component of 2-oxoglutarate dehydrogenase complex 1, mitochondrial (Precursor) GN=At5g55070 OS=Arabidopsis thaliana (Mouse-ear cress) PE=2 SV=1	Os04g0394200 [Oryza sativa Japonica Group]
TraesCS2A01G041300	15.1783	15.0555	14.4847	0	0	0	2.94198e-60	-10.9824	down	Fatty acid amide hydrolase GN=FAAH OS=Arabidopsis thaliana (Mouse-ear cress) PE=1 SV=1	predicted protein [Hordeum vulgare subsp. vulgare]
TraesCS2A01G041400	1.72626	1.15529	1.86958	0	0.026576	0	2.98803e-33	-6.70792	down	Fatty acid amide hydrolase GN=FAAH OS=Arabidopsis thaliana (Mouse-ear cress) PE=1 SV=1	predicted protein [Hordeum vulgare subsp. vulgare]
TraesCS2A01G041900	14.6784	16.4681	13.174	0	0	0	1.70715e-48	-10.1663	down	--	PREDICTED: uncharacterized protein LOC100823230 [Brachypodium distachyon]
TraesCS2A01G042000	1.65761	1.9364	1.75807	0	0	0	1.60243e-23	-7.77027	down	Phosphoglycerate mutase-like protein 1 {ECO:0000305} OS=Arabidopsis thaliana (Mouse-ear cress) PE=2 SV=1	predicted protein [Hordeum vulgare subsp. vulgare]
TraesCS2A01G042100	10.2895	12.0401	10.7397	0	0	0	8.55668e-47	-10.0252	down	Phosphoglycerate mutase-like protein 1 {ECO:0000305} OS=Arabidopsis thaliana (Mouse-ear cress) PE=2 SV=1	PREDICTED: phosphoglycerate mutase-like protein 1 [Brachypodium distachyon]
TraesCS2A01G042200	2.15926	1.93251	1.75671	0	0	0	6.18492e-25	-7.94371	down	Phosphoglycerate mutase-like protein 1 {ECO:0000305} OS=Arabidopsis thaliana (Mouse-ear cress) PE=2 SV=1	predicted protein [Hordeum vulgare subsp. vulgare]
TraesCS2A01G042400	2.03339	1.77203	1.77403	0	0	0	4.59783e-35	-9.00921	down	Disease resistance protein RPM1 GN=F17A9.20 OS=Arabidopsis thaliana (Mouse-ear cress) PE=1 SV=1	Disease resistance protein RPM1 [Triticum urartu]
TraesCS2A01G043200	9.0275	11.5362	11.1984	0	0	0	5.8746e-37	-9.20951	down	Bidirectional sugar transporter SWEET6b OS=Oryza sativa subsp. japonica (Rice) PE=2 SV=1	Protein RUPTURED POLLEN GRAIN 1 [Aegilops tauschii]
TraesCS2A01G043400	16.5844	15.6137	17.1597	0	0	0	6.80986e-45	-9.86403	down	Bidirectional sugar transporter SWEET6b GN=SWEET6B OS=Oryza sativa subsp. indica (Rice) PE=3 SV=1	Bidirectional sugar transporter SWEET6b [Triticum urartu]
TraesCS2A01G044700	2.18045	2.27568	2.26165	0.121142	0.014556	0.040154	7.19858e-31	-5.13586	down	Formin-like protein 18 (Precursor) GN=B1160F02.7 OS=Oryza sativa subsp. japonica (Rice) PE=2 SV=1	Formin-like protein 11 [Aegilops tauschii]
TraesCS2A01G044800	1.57353	1.9365	1.54885	0	0	0	2.5984e-30	-8.54661	down	--	Mortality factor 4-like protein 1 [Triticum urartu]
TraesCS2A01G045000	86.3058	107.865	87.0348	0	0	0	3.32768e-81	-12.2873	down	--	PREDICTED: ELMO domain-containing protein A [Brachypodium distachyon]
TraesCS2A01G045100	3.33764	2.25189	3.30328	0	0	0.003825	3.18178e-45	-8.715	down	--	predicted protein [Hordeum vulgare subsp. vulgare]
TraesCS2A01G046100	1.88648	1.56981	1.67517	0.004894	0	0	2.4535e-36	-7.9195	down	--	predicted protein [Hordeum vulgare subsp. vulgare]
TraesCS2A01G046400	0.583192	0.756429	0.7494	0.020425	0.014561	0.055703	3.19868e-17	-4.09553	down	Sugar transporter ERD6-like 5 GN=At1g54730 OS=Arabidopsis thaliana (Mouse-ear cress) PE=2 SV=2	predicted protein [Hordeum vulgare subsp. vulgare]
TraesCS2A01G048900	94.4916	129.238	119.174	0.245573	0.038291	0.070223	1.91733e-115	-9.58662	down	Defensin-like protein (Precursor) OS=Nelumbo nucifera (Sacred lotus) PE=3 SV=1	Defensin-like protein P322 [Aegilops tauschii]
TraesCS2A01G049000	48.671	65.0983	54.2733	0	0	0	9.43047e-45	-9.88884	down	Defensin Tk-AMP-D1.1 OS=Triticum kiharae (Wheat) PE=1 SV=1	defensin [Triticum aestivum]
TraesCS2A01G050400	0.61077	0.897427	0.804498	0	0	0	5.95873e-18	-7.04774	down	--	hypothetical protein TRIUR3_02510 [Triticum urartu]
TraesCS2A01G050600	8.19955	6.20872	6.12162	0	0	0	1.86148e-45	-9.94027	down	Peptidyl-prolyl cis-trans isomerase FKBP62 GN=MJL12.19 OS=Arabidopsis thaliana (Mouse-ear cress) PE=1 SV=2	70 kDa peptidyl-prolyl isomerase [Triticum urartu]
TraesCS2A01G051800	11.7134	8.62933	11.2293	0	0	0	1.44389e-37	-9.26657	down	Bidirectional sugar transporter SWEET6b GN=SWEET6B OS=Oryza sativa subsp. indica (Rice) PE=3 SV=1	Protein RUPTURED POLLEN GRAIN 1 [Aegilops tauschii]
TraesCS2A01G052000	4.75518	6.67705	4.50903	0	0	0	2.83454e-23	-7.77543	down	Cell number regulator 10 GN=CNR10 OS=Zea mays (Maize) PE=2 SV=1	hypothetical protein TRIUR3_01451 [Triticum urartu]
TraesCS2A01G052200	9.53966	10.7842	6.52689	0	0	0	2.1816e-28	-8.38499	down	--	hypothetical protein F775_25043 [Aegilops tauschii]
TraesCS2A01G052400	3.34901	2.36821	2.12206	0	0	0.040138	0.000145505	-4.18653	down	Pumilio homolog 2 GN=APUM2 OS=Arabidopsis thaliana (Mouse-ear cress) PE=1 SV=1	Pumilio-like protein [Aegilops tauschii]
TraesCS2A01G052900	3.73618	4.42019	3.68253	0	0	0	6.49283e-35	-9.00593	down	Tetrahydrocannabinolic acid synthase (Precursor) OS=Cannabis sativa (Hemp) PE=1 SV=1	Reticuline oxidase-like protein [Aegilops tauschii]
TraesCS2A01G053100	0.627854	0.702194	0.672562	0.021785	0.046327	0.030647	4.72026e-23	-4.23653	down	G-type lectin S-receptor-like serine/threonine-protein kinase RLK1 (Precursor) GN=RLK1 OS=Arabidopsis thaliana (Mouse-ear cress) PE=2 SV=2	G-type lectin S-receptor-like serine/threonine-protein kinase RLK1 [Triticum urartu]
TraesCS2A01G053200	2.05957	1.76172	1.30644	0	0	0	2.37323e-19	-7.24992	down	Peptidyl-prolyl cis-trans isomerase FKBP19, chloroplastic (Precursor) GN=T22N19.60 OS=Arabidopsis thaliana (Mouse-ear cress) PE=1 SV=1	Putative FKBP-type peptidyl-prolyl cis-trans isomerase 7, chloroplastic [Aegilops tauschii]
TraesCS2A01G053500	2.21678	2.1411	2.36972	0	0	0	1.63504e-25	-8.00691	down	Protein BEARSKIN1 GN=F24G24.150 OS=Arabidopsis thaliana (Mouse-ear cress) PE=2 SV=1	NAC domain-containing protein 68 [Aegilops tauschii]
TraesCS2A01G057800	13.8399	15.7324	14.7859	0.208942	0.185392	0.213417	3.75061e-139	-6.25432	down	Probable protein S-acyltransferase 14 GN=PAT14 OS=Arabidopsis thaliana (Mouse-ear cress) PE=2 SV=1	predicted protein [Hordeum vulgare subsp. vulgare]
TraesCS2A01G058000	12.1185	16.013	14.1379	0	0	0	5.73093e-47	-10.0639	down	Clathrin light chain 3 OS=Oryza sativa subsp. japonica (Rice) PE=3 SV=1	hypothetical protein TRIUR3_17128 [Triticum urartu]
TraesCS2A01G058600	2.41116	1.99082	1.97088	0	0	0	1.72856e-18	-7.12457	down	--	hypothetical protein F775_01025 [Aegilops tauschii]
TraesCS2A01G058700	2.21277	2.2202	1.90719	0	0	0	2.44745e-21	-7.49327	down	--	hypothetical protein TRIUR3_01609 [Triticum urartu]
TraesCS2A01G059800	1.76063	1.96224	2.01737	0.016963	0	0	3.03291e-45	-7.77013	down	Cation-chloride cotransporter 2 OS=Oryza sativa subsp. japonica (Rice) PE=2 SV=2	Solute carrier family 12 member 7 [Aegilops tauschii]
TraesCS2A01G059900	0.398119	0.354072	0.359217	0	0	0	6.05039e-15	-6.55321	down	--	predicted protein [Hordeum vulgare subsp. vulgare]
TraesCS2A01G060200	3.74953	4.14069	4.10228	0	0	0	7.08939e-33	-8.79891	down	THO complex subunit 4D GN=K12B20.19 OS=Arabidopsis thaliana (Mouse-ear cress) PE=1 SV=1	PREDICTED: THO complex subunit 4D-like [Brachypodium distachyon]
TraesCS2A01G060700	0.43536	0.374571	0.588149	0	0	0	8.34059e-19	-7.17859	down	--	hypothetical protein F775_22801 [Aegilops tauschii]
TraesCS2A01G061000	2.5065	2.39543	2.32875	0	0	0	1.60661e-34	-8.9549	down	Probable protein transport Sec1a GN=OSJNBa0032B23.7 OS=Oryza sativa subsp. japonica (Rice) PE=3 SV=2	Putative protein transport Sec1a [Aegilops tauschii]
TraesCS2A01G061100	3.91537	3.01769	3.21742	0.184469	0.243377	0.10472	3.7843e-60	-4.36213	down	Probable cleavage and polyadenylation specificity factor subunit 1 GN=OSJNBa0032B23.5 OS=Oryza sativa subsp. japonica (Rice) PE=3 SV=2	PREDICTED: probable cleavage and polyadenylation specificity factor subunit 1 isoform X1 [Brachypodium distachyon]
TraesCS2A01G062000	57.0122	67.1845	35.6111	0	0	0	5.45284e-59	-11.0424	down	--	hypothetical protein TRIUR3_00666 [Triticum urartu]
TraesCS2A01G062100	1.26144	1.28516	0.966884	0	0	0	1.21343e-16	-6.83505	down	Proline-rich protein 2 (Precursor) GN=PRP2 OS=Arabidopsis thaliana (Mouse-ear cress) PE=2 SV=1	hypothetical protein F775_27439 [Aegilops tauschii]
TraesCS2A01G062200	5.10396	5.10422	4.84943	0	0.025788	0	1.19449e-36	-7.92792	down	Proline-rich protein 4 (Precursor) GN=PRP4 OS=Arabidopsis thaliana (Mouse-ear cress) PE=2 SV=1	hypothetical protein TRIUR3_00666 [Triticum urartu]
TraesCS2A01G062400	2.53407	2.39021	2.15895	0	0	0	1.64622e-17	-6.95762	down	--	predicted protein [Hordeum vulgare subsp. vulgare]
TraesCS2A01G062500	1.61573	2.42253	2.81506	0	0	0	6.79789e-25	-8.00025	down	--	hypothetical protein TRIUR3_00670 [Triticum urartu]
TraesCS2A01G062800	16.9458	21.1924	11.2102	0.954152	1.23047	2.96031	3.37549e-19	-3.56172	down	--	hypothetical protein TRIUR3_25774 [Triticum urartu]
TraesCS2A01G062900	11.3019	15.8317	5.71837	0	0	0	5.53407e-36	-9.29479	down	--	hypothetical protein TRIUR3_25774 [Triticum urartu]
TraesCS2A01G063000	6.92695	8.20293	2.41177	0.018419	0	0	2.26913e-25	-7.71875	down	--	hypothetical protein TRIUR3_25775 [Triticum urartu]
TraesCS2A01G063100	2.22239	2.73862	1.24191	0	0	0	8.56276e-19	-7.2264	down	--	hypothetical protein TRIUR3_04555 [Triticum urartu]
TraesCS2A01G063600	3.60044	4.86308	4.57236	0.043043	0	0.031198	6.04101e-08	-4.99629	down	--	hypothetical protein F775_04663 [Aegilops tauschii]
TraesCS2A01G064200	2.76845	2.28119	3.70008	0	0	0	9.26593e-25	-7.9761	down	--	predicted protein [Hordeum vulgare subsp. vulgare]
TraesCS2A01G064300	2.8924	2.9195	2.5007	0	0	0	2.96687e-27	-8.23947	down	Receptor homology region, transmembrane domain- and RING domain-containing protein 1 (Precursor) GN=K2A18.24 OS=Arabidopsis thaliana (Mouse-ear cress) PE=2 SV=1	predicted protein [Hordeum vulgare subsp. vulgare]
TraesCS2A01G064600	2.37789	2.39845	2.40355	0	0	0	1.25466e-37	-9.24092	down	PHD finger protein At2g01810 GN=At2g01810 OS=Arabidopsis thaliana (Mouse-ear cress) PE=3 SV=1	hypothetical protein F775_09281 [Aegilops tauschii]
TraesCS2A01G064700	12.6179	11.6603	11.0803	0.691722	0.449779	0.371995	5.10572e-99	-4.69478	down	E3 ubiquitin-protein ligase UPL3 GN=F20M13.160/F20M13.170 OS=Arabidopsis thaliana (Mouse-ear cress) PE=1 SV=1	E3 ubiquitin-protein ligase UPL3 [Aegilops tauschii]
TraesCS2A01G064800	0.868074	0.72724	0.722898	0.031286	0.060384	0.037628	1.43416e-25	-4.15458	down	--	hypothetical protein F775_15435 [Aegilops tauschii]
TraesCS2A01G064900	13.4117	12.5654	17.2763	0	0	0	2.09898e-35	-9.07449	down	Heavy metal-associated isoprenylated plant protein 26 (Precursor) GN=F20M13.140 OS=Arabidopsis thaliana (Mouse-ear cress) PE=1 SV=1	heavy metal-associated isoprenylated protein 1 [Triticum aestivum]
TraesCS2A01G065000	8.52406	9.84701	7.33894	0.849882	0.609376	0.89071	8.30998e-66	-3.61393	down	--	predicted protein [Hordeum vulgare subsp. vulgare]
TraesCS2A01G065100	14.0903	12.4883	13.3095	2.19256	0.691459	0.752325	4.1392e-238	-4.39519	down	--	PREDICTED: mRNA-capping enzyme-like [Brachypodium distachyon]
TraesCS2A01G065700	50.2992	52.6918	43.2683	0.415018	0.332558	0.369162	6.56482e-252	-7.15277	down	Probable aquaporin PIP2-6 GN=OSJNBb0093G06.10 OS=Oryza sativa subsp. japonica (Rice) PE=2 SV=2	plasma membrane intrinsic protein [Triticum aestivum]
TraesCS2A01G066000	2.25042	2.24665	1.94486	0	0	0	7.43281e-29	-8.3816	down	--	hypothetical protein F775_28879 [Aegilops tauschii]
TraesCS2A01G066100	36.3845	37.2539	19.8287	0	0	0	1.15503e-59	-10.9547	down	40S ribosomal protein S6 GN=rps6 OS=Asparagus officinalis (Garden asparagus) PE=2 SV=1	40S ribosomal protein S6 [Triticum urartu]
TraesCS2A01G066200	44.7213	45.1262	38.936	0.034123	0	0	4.3854e-85	-10.5237	down	40S ribosomal protein S6 GN=rps6 OS=Asparagus officinalis (Garden asparagus) PE=2 SV=1	40S ribosomal protein S6 [Triticum urartu]
TraesCS2A01G066700	15.3794	14.3966	19.3257	2.16627	1.42794	1.14113	3.13627e-40	-3.51156	down	Ribulose bisphosphate carboxylase small chain PWS4.3, chloroplastic (Precursor) OS=Triticum aestivum (Wheat) PE=3 SV=2	predicted protein [Hordeum vulgare subsp. vulgare]
TraesCS2A01G066800	1.79222	2.09314	1.91853	0.139026	0	0.022696	2.00762e-18	-4.79826	down	Ribulose bisphosphate carboxylase small chain PW9, chloroplastic (Precursor) OS=Triticum aestivum (Wheat) PE=3 SV=1	Ribulose bisphosphate carboxylase small chain PW9, chloroplastic [Aegilops tauschii]
TraesCS2A01G066900	3.72451	3.3832	2.97371	0.03632	0.041871	0.044556	3.20643e-39	-5.92819	down	Ribulose bisphosphate carboxylase small chain PWS4.3, chloroplastic (Precursor) OS=Triticum aestivum (Wheat) PE=3 SV=2	predicted protein [Hordeum vulgare subsp. vulgare]
TraesCS2A01G067100	3.85225	3.49682	4.08512	0	0	0	4.12179e-25	-7.96272	down	Ribulose bisphosphate carboxylase small chain PW9, chloroplastic (Precursor) OS=Triticum aestivum (Wheat) PE=3 SV=1	Ribulose bisphosphate carboxylase small chain PW9, chloroplastic [Aegilops tauschii]
TraesCS2A01G067200	7.53846	6.18348	8.17185	0.009985	0.010597	0.009722	2.69163e-65	-8.26252	down	Ribulose bisphosphate carboxylase small chain PW9, chloroplastic (Precursor) OS=Triticum aestivum (Wheat) PE=3 SV=1	RecName: Full=Ribulose bisphosphate carboxylase small chain PW9, chloroplastic; Short=RuBisCO small subunit PW9; Flags: Precursor [Triticum aestivum]
TraesCS2A01G067300	15.8133	17.0203	16.791	0	0	0.023825	8.91716e-67	-9.52046	down	Ribulose bisphosphate carboxylase small chain PW9, chloroplastic (Precursor) OS=Triticum aestivum (Wheat) PE=3 SV=1	Ribulose bisphosphate carboxylase small chain PW9, chloroplastic [Aegilops tauschii]
TraesCS2A01G067400	1.75538	1.79799	1.62905	0	0	0	4.61042e-23	-7.71076	down	--	hypothetical protein TRIUR3_00606 [Triticum urartu]
TraesCS2A01G067500	1.51703	1.46275	1.48733	0	0	0	1.00882e-26	-8.14274	down	Aspartic proteinase-like protein 1 (Precursor) GN=At5g10080 OS=Arabidopsis thaliana (Mouse-ear cress) PE=1 SV=1	predicted protein [Hordeum vulgare subsp. vulgare]
TraesCS2A01G067700	5.14061	3.1301	4.54842	0.083231	0	0	5.02212e-07	-4.92894	down	--	predicted protein [Hordeum vulgare subsp. vulgare]
TraesCS2A01G067800	2.6297	2.22709	2.38105	0	0	0	3.2157e-30	-8.52753	down	Glucose-6-phosphate 1-dehydrogenase 2, chloroplastic (Precursor) GN=At5g13110 OS=Arabidopsis thaliana (Mouse-ear cress) PE=2 SV=2	Glucose-6-phosphate 1-dehydrogenase 2, chloroplastic [Triticum urartu]
TraesCS2A01G068000	0.424726	0.531571	0.395841	0	0	0	4.0956e-16	-6.75541	down	Probable LRR receptor-like serine/threonine-protein kinase At3g47570 (Precursor) GN=At3g47570 OS=Arabidopsis thaliana (Mouse-ear cress) PE=2 SV=1	Putative LRR receptor-like serine/threonine-protein kinase [Aegilops tauschii]
TraesCS2A01G068100	0.679393	0.580481	0.534945	0	0	0	1.47111e-22	-7.65284	down	Probable LRR receptor-like serine/threonine-protein kinase At3g47570 (Precursor) GN=At3g47570 OS=Arabidopsis thaliana (Mouse-ear cress) PE=2 SV=1	predicted protein [Hordeum vulgare subsp. vulgare]
TraesCS2A01G068200	0.53824	0.658229	0.697012	0	0	0	2.66079e-18	-7.10286	down	Probable LRR receptor-like serine/threonine-protein kinase At3g47570 (Precursor) GN=At3g47570 OS=Arabidopsis thaliana (Mouse-ear cress) PE=2 SV=1	Putative LRR receptor-like serine/threonine-protein kinase [Aegilops tauschii]
TraesCS2A01G068800	0.447873	0.441622	0.422408	0	0	0	1.66589e-18	-7.10073	down	Probable LRR receptor-like serine/threonine-protein kinase At3g47570 (Precursor) GN=At3g47570 OS=Arabidopsis thaliana (Mouse-ear cress) PE=2 SV=1	Putative LRR receptor-like serine/threonine-protein kinase [Aegilops tauschii]
TraesCS2A01G069200	16.6069	9.08176	15.3288	0	0	0	2.39792e-37	-9.31445	down	--	50S ribosomal protein L30 [Triticum urartu]
TraesCS2A01G069400	27.9362	22.6115	32.5385	1.74622	1.98118	0.925727	2.65101e-54	-4.28484	down	Biotin carboxylase GN=OsJ_17935 OS=Oryza sativa subsp. japonica (Rice) PE=3 SV=2	plastid acetyl-CoA carboxylase [Triticum aestivum]
TraesCS2A01G069500	15.7284	15.3306	13.7235	0.027603	0.029068	0.022499	6.88228e-186	-9.03986	down	FACT complex subunit SPT16 GN=OSJNBb0062H02.2 OS=Oryza sativa subsp. japonica (Rice) PE=2 SV=2	hypothetical protein [Triticum turgidum subsp. durum]
TraesCS2A01G069800	5.65919	5.23193	6.19062	0	0	0.011351	4.92497e-42	-8.39125	down	--	predicted protein [Hordeum vulgare subsp. vulgare]
TraesCS2A01G070100	0.881113	1.07113	0.774608	0	0	0	5.15171e-19	-7.1926	down	Anthocyanidin 5,3-O-glucosyltransferase GN=RhGT1 OS=Rosa hybrid cultivar PE=2 SV=1	Anthocyanidin 5,3-O-glucosyltransferase [Aegilops tauschii]
TraesCS2A01G070300	14.5666	13.7788	11.7465	1.18884	0	0.687709	0.00246306	-3.37151	down	Lactoylglutathione lyase OS=Cicer arietinum (Chickpea) PE=2 SV=1	predicted protein [Hordeum vulgare subsp. vulgare]
TraesCS2A01G070400	4.56513	5.01192	4.75198	0.370795	0.494839	0.616629	3.79249e-56	-3.60374	down	--	Glycerol-3-phosphate dehydrogenase SDP6, mitochondrial [Aegilops tauschii]
TraesCS2A01G070500	7.7505	9.43692	8.44524	0.453973	0.180715	0.161655	2.99631e-53	-5.09381	down	Glycerol-3-phosphate dehydrogenase SDP6, mitochondrial (Precursor) GN=SDP6 OS=Arabidopsis thaliana (Mouse-ear cress) PE=1 SV=1	predicted protein [Hordeum vulgare subsp. vulgare]
TraesCS2A01G070700	2.5519	1.84454	1.9366	0	0	0	1.80394e-36	-9.16337	down	Disease resistance protein RPM1 GN=F17A9.20 OS=Arabidopsis thaliana (Mouse-ear cress) PE=1 SV=1	Disease resistance protein RPM1 [Triticum urartu]
TraesCS2A01G071100	11.5727	11.8511	10.6025	2.17574	1.91102	1.51395	2.34201e-51	-2.58387	down	--	predicted protein [Hordeum vulgare subsp. vulgare]
TraesCS2A01G072400	2.13201	1.32147	1.44457	0.11224	0.101798	0.080978	1.36075e-17	-3.92146	down	Thylakoid lumenal 15.0 kDa protein 2, chloroplastic (Precursor) GN=At5g52970 OS=Arabidopsis thaliana (Mouse-ear cress) PE=1 SV=2	predicted protein [Hordeum vulgare subsp. vulgare]
TraesCS2A01G072500	3.66997	2.64874	3.18096	0.10036	0.195548	0.192799	4.89637e-68	-4.42	down	Vacuolar protein sorting-associated protein 54, chloroplastic (Precursor) GN=VPS54 OS=Arabidopsis thaliana (Mouse-ear cress) PE=1 SV=1	PREDICTED: vacuolar protein sorting-associated protein 54, chloroplastic [Brachypodium distachyon]
TraesCS2A01G072700	0.443476	0.368707	0.317512	0	0	0	2.34617e-16	-6.8064	down	Putative SWI/SNF-related matrix-associated actin-dependent regulator of chromatin subfamily A member 3-like 3 GN=At5g43530 OS=Arabidopsis thaliana (Mouse-ear cress) PE=3 SV=1	Putative SWI/SNF-related matrix-associated actin-dependent regulator of chromatin subfamily A member 3-like protein 3 [Aegilops tauschii]
TraesCS2A01G072800	2.06199	1.83919	2.1521	0	0	0	5.2492e-27	-8.20668	down	GDT1-like protein 2, chloroplastic (Precursor) OS=Oryza sativa subsp. japonica (Rice) PE=2 SV=1	predicted protein [Hordeum vulgare subsp. vulgare]
TraesCS2A01G073700	1.66382	2.08015	1.79182	0	0	0	1.92162e-25	-8.01129	down	Putative FBD-associated F-box protein At3g50710 GN=At3g50710 OS=Arabidopsis thaliana (Mouse-ear cress) PE=4 SV=1	hypothetical protein F775_52651 [Aegilops tauschii]
TraesCS2A01G073800	3.16318	2.65014	2.95309	0	0	0	3.09571e-35	-9.02576	down	5&apos;-3&apos; exoribonuclease 3 GN=XRN3 OS=Arabidopsis thaliana (Mouse-ear cress) PE=2 SV=1	5&apos;-3&apos; exoribonuclease 3 [Aegilops tauschii]
TraesCS2A01G075800	5.67143	4.68276	5.14049	0	0	0	2.78931e-43	-9.7359	down	Methyl-CpG-binding domain-containing protein 13 GN=MBD13 OS=Arabidopsis thaliana (Mouse-ear cress) PE=2 SV=1	hypothetical protein TRIUR3_20569 [Triticum urartu]
TraesCS2A01G076100	40.8728	50.9775	43.7868	0	0	0	2.28203e-73	-11.836	down	IAA-amino acid hydrolase ILR1-like 8 (Precursor) GN=P0021G06.115 OS=Oryza sativa subsp. japonica (Rice) PE=2 SV=1	IAA-amino acid hydrolase ILR1-like protein 8 [Aegilops tauschii]
TraesCS2A01G076700	21.7657	16.421	20.3896	0.1428	0.172693	0.189118	2.4874e-225	-6.87174	down	Elongation factor 1-alpha C GN=TEF-C OS=Porphyra purpurea (Red seaweed) PE=2 SV=1	GTP-binding protein [Triticum aestivum]
TraesCS2A01G076800	1.7345	1.57553	1.76557	0	0	0	8.50095e-27	-8.15475	down	Putative FBD-associated F-box protein At5g56440 GN=At5g56440 OS=Arabidopsis thaliana (Mouse-ear cress) PE=3 SV=1	hypothetical protein F775_21875 [Aegilops tauschii]
TraesCS2A01G076900	17.063	19.2566	17.1208	0.044881	0	0.043942	4.16774e-87	-8.43135	down	ER membrane protein complex subunit 8/9 homolog GN=EMB2731 OS=Arabidopsis thaliana (Mouse-ear cress) PE=2 SV=1	predicted protein [Hordeum vulgare subsp. vulgare]
TraesCS2A01G077100	4.9883	5.48195	8.17507	0	0	0	1.92451e-39	-9.49163	down	UDP-glycosyltransferase 92A1 GN=UGT92A1 OS=Arabidopsis thaliana (Mouse-ear cress) PE=2 SV=1	Anthocyanidin 3-O-glucosyltransferase 5 [Aegilops tauschii]
TraesCS2A01G077600	0.516978	0.796057	0.772524	0	0	0	1.49272e-16	-6.84432	down	UDP-glycosyltransferase 92A1 GN=UGT92A1 OS=Arabidopsis thaliana (Mouse-ear cress) PE=2 SV=1	Anthocyanidin 3-O-glucosyltransferase 5 [Aegilops tauschii]
TraesCS2A01G077800	1.92351	1.53506	1.86207	0	0	0	1.98902e-27	-8.22591	down	NAD-dependent protein deacetylase SRT1 GN=SRT1 OS=Oryza sativa subsp. indica (Rice) PE=2 SV=1	predicted protein [Hordeum vulgare subsp. vulgare]
TraesCS2A01G078000	2.05491	2.85986	3.90612	0	0	0	9.92703e-25	-7.99566	down	Protein STRICTOSIDINE SYNTHASE-LIKE 10 {ECO:0000303|PubMed:10777701} (Precursor) OS=Arabidopsis thaliana (Mouse-ear cress) PE=2 SV=1	putative Strictosidine synthase [Aegilops tauschii]
TraesCS2A01G078900	0.678694	0.954151	6.21951	0	0	0.025007	0.000549414	-3.91475	down	Protein trichome birefringence-like 1 GN=TBL1 OS=Arabidopsis thaliana (Mouse-ear cress) PE=2 SV=1	hypothetical protein TRIUR3_16646 [Triticum urartu]
TraesCS2A01G079300	1.282	1.26796	1.43525	0	0	0	1.05824e-26	-8.14681	down	Serine/threonine-protein kinase GN=PUB33 OS=Arabidopsis thaliana (Mouse-ear cress) PE=2 SV=2	predicted protein [Hordeum vulgare subsp. vulgare]
TraesCS2A01G079500	24.9082	25.7968	23.7515	0	0	0	2.54132e-82	-12.3038	down	--	predicted protein [Hordeum vulgare subsp. vulgare]
TraesCS2A01G079600	0.322929	0.304465	0.302028	0	0.018354	0	4.18745e-15	-4.99894	down	Probable receptor-like protein kinase At1g30570 (Precursor) GN=At1g30570 OS=Arabidopsis thaliana (Mouse-ear cress) PE=3 SV=1	PREDICTED: receptor-like protein kinase THESEUS 1 [Phoenix dactylifera]
TraesCS2A01G079900	0.888165	0.693764	0.545474	0	0	0	1.17208e-22	-7.6912	down	--	hypothetical protein TRIUR3_15420 [Triticum urartu]
TraesCS2A01G080000	4.48363	5.92251	4.09105	0	0.015719	0	2.03127e-32	-7.65366	down	--	predicted protein [Hordeum vulgare subsp. vulgare]
TraesCS2A01G080400	0.58118	0.512649	0.369265	0	0	0	3.05831e-18	-7.09122	down	--	hypothetical protein F775_00464 [Aegilops tauschii]
TraesCS2A01G080700	2.69599	2.50333	3.072	0	0	0	1.20088e-43	-9.77814	down	--	hypothetical protein TRIUR3_21509 [Triticum urartu]
TraesCS2A01G081300	1.98985	2.76086	2.3547	0	0	0	1.41328e-23	-7.80204	down	Transcription factor bHLH47 GN=F1P2.190 OS=Arabidopsis thaliana (Mouse-ear cress) PE=2 SV=1	Transcription factor bHLH47 [Triticum urartu]
TraesCS2A01G081400	8.0452	7.65104	7.276	0.027143	0	0	6.003e-53	-8.65967	down	Serine/threonine-protein kinase CDL1 {ECO:0000305} OS=Arabidopsis thaliana (Mouse-ear cress) PE=1 SV=1	Serine/threonine-protein kinase PBS1 [Triticum urartu]
TraesCS2A01G081900	3.08042	2.4618	2.86075	0	0	0	4.12975e-41	-9.56574	down	Two-component response regulator-like PRR37 GN=PRR37 OS=Oryza sativa subsp. indica (Rice) PE=2 SV=2	pseudo-response regulator [Triticum polonicum]
TraesCS2A01G082000	5.11149	5.55761	3.976	0	0	0.039397	1.35034e-05	-4.61521	down	--	PREDICTED: required for meiotic nuclear division protein 1 homolog [Brachypodium distachyon]
TraesCS2A01G082100	188.704	191.667	189.031	0	0.232056	0.53747	1.83419e-07	-5.39817	down	L-ascorbate peroxidase 2, cytosolic OS=Oryza sativa subsp. japonica (Rice) PE=1 SV=1	L-ascorbate peroxidase 2, cytosolic [Aegilops tauschii]
TraesCS2A01G082200	4.33776	3.53472	3.68672	0	0	0	8.5197e-32	-8.69457	down	Arogenate dehydratase/prephenate dehydratase 2, chloroplastic (Precursor) GN=MLP3.8 OS=Arabidopsis thaliana (Mouse-ear cress) PE=1 SV=1	predicted protein [Hordeum vulgare subsp. vulgare]
TraesCS2A01G082400	1.17978	1.34357	1.04007	0	0	0	1.21521e-16	-6.83367	down	--	hypothetical protein F775_01768 [Aegilops tauschii]
TraesCS2A01G083000	111.092	94.8485	133.532	0.15096	0.316393	0.100242	1.41138e-169	-8.97642	down	Elongation factor 1-alpha GN=BLT63 OS=Hordeum vulgare (Barley) PE=1 SV=1	Elongation factor 1-alpha [Aegilops tauschii]
TraesCS2A01G083300	86.1402	82.1648	75.0106	1.06093	2.34565	2.42737	4.92655e-93	-5.49333	down	Elongation factor 1-alpha GN=BLT63 OS=Hordeum vulgare (Barley) PE=1 SV=1	Elongation factor 1-alpha [Triticum urartu]
TraesCS2A01G083900	1.06991	0.757569	1.18038	0	0	0	1.61706e-16	-6.83205	down	Peroxidase 21 (Precursor) GN=T2N18.11 OS=Arabidopsis thaliana (Mouse-ear cress) PE=1 SV=1	Peroxidase 21 [Aegilops tauschii]
TraesCS2A01G084000	2.32859	2.20302	2.89273	0	0	0	2.89548e-31	-8.6543	down	Phosphoinositide phospholipase C 2 GN=PLC2 OS=Arabidopsis thaliana (Mouse-ear cress) PE=1 SV=1	predicted protein [Hordeum vulgare subsp. vulgare]
TraesCS2A01G084200	4.0456	3.52737	3.45458	0.006041	0.017766	0.007507	2.06496e-92	-7.95248	down	--	predicted protein [Hordeum vulgare subsp. vulgare]
TraesCS2A01G084800	10.0808	9.8697	11.0639	0	0.014095	0	1.27037e-56	-9.42475	down	Omega-3 fatty acid desaturase, chloroplastic (Precursor) GN=FAD7A-1 OS=Ricinus communis (Castor bean) PE=2 SV=1	plastid omega-3 fatty acid desaturase [Triticum aestivum]
TraesCS2A01G084900	1.01661	1.35316	1.20795	0	0	0	3.85679e-28	-8.32656	down	Chaperone protein dnaJ 49 OS=Arabidopsis thaliana (Mouse-ear cress) PE=2 SV=2	Uncharacterized J domain-containing protein C17A3.05c [Triticum urartu]
TraesCS2A01G085000	3.90012	3.15785	3.15741	0	0.032043	0	0.000607502	-3.90139	down	--	Syntaxin-binding protein 5-like protein [Triticum urartu]
TraesCS2A01G085100	1.27078	0.792494	0.911819	0	0	0	6.3115e-21	-7.47161	down	Protein CHROMATIN REMODELING 4 {ECO:0000303|PubMed:16547115} OS=Arabidopsis thaliana (Mouse-ear cress) PE=2 SV=1	predicted protein [Hordeum vulgare subsp. vulgare]
TraesCS2A01G086400	14.3685	16.7016	14.6947	1.64364	1.43186	0.615015	1.74288e-33	-3.75061	down	26S protease regulatory subunit 6B homolog GN=MCK7.16 OS=Arabidopsis thaliana (Mouse-ear cress) PE=1 SV=1	predicted protein [Hordeum vulgare subsp. vulgare]
TraesCS2A01G086900	6.56221	6.55551	8.08632	0	0	0	1.58991e-44	-9.8641	down	Protein ESKIMO 1 GN=F27K19.170 OS=Arabidopsis thaliana (Mouse-ear cress) PE=1 SV=1	predicted protein [Hordeum vulgare subsp. vulgare]
TraesCS2A01G087000	13.2396	12.432	10.2291	0.079471	0.019358	0.089726	5.95777e-156	-7.5449	down	Probable AMP deaminase GN=P0034A04.129 OS=Oryza sativa subsp. japonica (Rice) PE=2 SV=1	predicted protein [Hordeum vulgare subsp. vulgare]
TraesCS2A01G087100	6.09609	3.69201	5.4413	0	0	0	3.48214e-33	-8.88566	down	Probable protein phosphatase 2C 32 OS=Oryza sativa subsp. japonica (Rice) PE=2 SV=1	predicted protein [Hordeum vulgare subsp. vulgare]
TraesCS2A01G087400	2.63016	3.88248	4.69655	0	0	0	5.21742e-22	-7.64102	down	BTB/POZ and MATH domain-containing protein 3 GN=BPM3 OS=Arabidopsis thaliana (Mouse-ear cress) PE=1 SV=1	hypothetical protein F775_04185 [Aegilops tauschii]
TraesCS2A01G087700	1.11208	1.50763	2.64335	0	0	0	3.59725e-18	-7.15968	down	BTB/POZ and MATH domain-containing protein 2 GN=BPM2 OS=Arabidopsis thaliana (Mouse-ear cress) PE=1 SV=1	hypothetical protein F775_04185 [Aegilops tauschii]
TraesCS2A01G087800	1.08111	1.09573	1.75584	0	0	0	4.67382e-17	-6.93419	down	BTB/POZ and MATH domain-containing protein 2 GN=BPM2 OS=Arabidopsis thaliana (Mouse-ear cress) PE=1 SV=1	hypothetical protein F775_04185 [Aegilops tauschii]
TraesCS2A01G088000	4.19239	3.92839	4.33711	0.040032	0.039761	0.013738	8.27605e-120	-6.87071	down	--	PREDICTED: importin-11 isoform X1 [Brachypodium distachyon]
TraesCS2A01G088300	3.70129	4.57798	3.5505	0	0	0	1.53398e-28	-8.36486	down	Isoflavone reductase homolog OS=Lupinus albus (White lupin) PE=2 SV=1	Isoflavone reductase-like protein [Aegilops tauschii]
TraesCS2A01G088500	1.8359	1.88091	1.87179	0	0	0	4.49328e-26	-8.06974	down	--	hypothetical protein F775_08827 [Aegilops tauschii]
TraesCS2A01G088600	38.2961	43.3108	44.2813	0.137824	0.154265	0.201431	0	-8.08531	down	Pyruvate decarboxylase 2 GN=PDC2 OS=Oryza sativa subsp. indica (Rice) PE=2 SV=2	predicted protein [Hordeum vulgare subsp. vulgare]
TraesCS2A01G088800	7.02482	6.33998	5.96932	0	0	0	2.61355e-40	-9.48336	down	Probable LRR receptor-like serine/threonine-protein kinase MRH1 (Precursor) GN=MRH1 OS=Arabidopsis thaliana (Mouse-ear cress) PE=2 SV=1	predicted protein [Hordeum vulgare subsp. vulgare]
TraesCS2A01G088900	2.68197	2.24908	2.20885	0	0	0	4.35618e-38	-9.29654	down	Ubiquitin-activating enzyme E1 3 GN=UBA3 OS=Triticum aestivum (Wheat) PE=2 SV=1	RecName: Full=Ubiquitin-activating enzyme E1 3 [Triticum aestivum]
TraesCS2A01G089100	1.31543	1.23596	1.41777	0	0	0	4.47306e-25	-7.96167	down	--	hypothetical protein TRIUR3_20625 [Triticum urartu]
TraesCS2A01G089200	0.602375	0.591795	0.396996	0	0	0	6.0502e-17	-6.89163	down	--	hypothetical protein TRIUR3_22689 [Triticum urartu]
TraesCS2A01G089300	4.20732	4.05358	4.06277	0.015516	0	0	1.87316e-37	-7.99712	down	Heat stress transcription factor A-2b OS=Oryza sativa subsp. japonica (Rice) PE=2 SV=1	heat shock factor A2b [Triticum aestivum]
TraesCS2A01G089400	3.63262	2.83782	5.02863	0	0	0	6.49549e-26	-8.1194	down	Abscisic acid receptor PYL5 GN=K18I23.25 OS=Arabidopsis thaliana (Mouse-ear cress) PE=1 SV=1	predicted protein [Hordeum vulgare subsp. vulgare]
TraesCS2A01G089600	4.10257	4.56918	3.97421	0.004033	0	0	1.9659e-38	-8.6482	down	--	predicted protein [Hordeum vulgare subsp. vulgare]
TraesCS2A01G089900	1.49529	1.31071	1.36839	0	0	0	3.44494e-15	-6.59392	down	CASP-like protein 4B1 OS=Hordeum vulgare var. distichum (Domesticated barley) PE=2 SV=1	hypothetical protein TRIUR3_16156 [Triticum urartu]
TraesCS2A01G090000	55.2629	46.1471	58.1737	0.385294	0.066561	0.318976	1.92171e-39	-7.25605	down	26S protease regulatory subunit 4 homolog GN=P0034A04.112 OS=Oryza sativa subsp. japonica (Rice) PE=2 SV=2	predicted protein [Hordeum vulgare subsp. vulgare]
TraesCS2A01G090100	0.505979	0.537131	0.622182	0	0	0	9.94619e-16	-6.68764	down	Leucine-rich repeat receptor-like protein kinase PEPR2 (Precursor) GN=PEPR2 OS=Arabidopsis thaliana (Mouse-ear cress) PE=1 SV=1	Receptor-like protein kinase [Aegilops tauschii]
TraesCS2A01G090900	3.00004	3.2102	3.81682	0	0	0	4.77855e-29	-8.41942	down	Sex determination protein tasselseed-2 GN=TS2 OS=Zea mays (Maize) PE=2 SV=1	Os07g0691600 [Oryza sativa Japonica Group]
TraesCS2A01G091000	9.99884	11.1932	10.2157	0	0	0	3.78503e-45	-9.89013	down	Sex determination protein tasselseed-2 GN=TS2 OS=Zea mays (Maize) PE=2 SV=1	PREDICTED: short-chain dehydrogenase reductase 2a-like [Brachypodium distachyon]
TraesCS2A01G091100	8.60008	9.57682	9.0535	0	0	0	4.12595e-44	-9.80494	down	Sex determination protein tasselseed-2 GN=TS2 OS=Zea mays (Maize) PE=2 SV=1	tasselseed2-like short-chain dehydrogenase/reductase, partial [Hordeum vulgare]
TraesCS2A01G091700	4.48603	4.06543	3.98435	0.009522	0	0	1.97715e-60	-9.13122	down	Nuclear pore complex protein NUP214 {ECO:0000303|PubMed:21189294} OS=Arabidopsis thaliana (Mouse-ear cress) PE=1 SV=1	hypothetical protein TRIUR3_16071 [Triticum urartu]
TraesCS2A01G092000	2.00455	1.89539	1.53358	0	0	0	4.55062e-22	-7.6018	down	Cysteine-rich receptor-like protein kinase 26 (Precursor) GN=CRK26 OS=Arabidopsis thaliana (Mouse-ear cress) PE=2 SV=1	Cysteine-rich receptor-like protein kinase 26 [Triticum urartu]
TraesCS2A01G092200	14.6834	15.7496	12.504	0.022392	0	0	4.10917e-33	-8.18126	down	Wound-induced protein 1 GN=WUN1 OS=Solanum tuberosum (Potato) PE=2 SV=1	hypothetical protein TRIUR3_05350 [Triticum urartu]
TraesCS2A01G092400	6.92637	5.20532	5.76922	0	0	0	6.11599e-49	-10.1889	down	--	PREDICTED: uncharacterized protein LOC100840063 [Brachypodium distachyon]
TraesCS2A01G092700	5.03981	5.75723	4.98438	0	0	0	1.61537e-40	-9.51196	down	ACT domain-containing protein ACR2 {ECO:0000305} OS=Arabidopsis thaliana (Mouse-ear cress) PE=3 SV=1	hypothetical protein F775_21043 [Aegilops tauschii]
TraesCS2A01G092800	26.3069	32.4174	29.9852	0	0	0	3.66311e-70	-11.6425	down	Pectinesterase 21 GN=F18C1.12 OS=Arabidopsis thaliana (Mouse-ear cress) PE=2 SV=2	PREDICTED: pectinesterase-like [Brachypodium distachyon]
TraesCS2A01G093600	3.90194	5.0754	4.2239	0	0	0	8.85911e-33	-8.80919	down	--	hypothetical protein TRIUR3_25212 [Triticum urartu]
TraesCS2A01G093700	4.62217	4.94309	4.51905	0	0	0.012518	1.1816e-56	-8.47987	down	Probable protein phosphatase 2C 33 OS=Oryza sativa subsp. japonica (Rice) PE=2 SV=1	predicted protein [Hordeum vulgare subsp. vulgare]
TraesCS2A01G094000	14.0785	11.0769	12.0955	0.006249	0.193462	0.143373	8.60041e-10	-5.38456	down	Methyl-CpG-binding domain-containing protein 9 GN=MBD9 OS=Arabidopsis thaliana (Mouse-ear cress) PE=2 SV=1	PHD and RING finger domain-containing protein 1 [Triticum urartu]
TraesCS2A01G094100	10.2479	12.1692	10.1984	0	0	0	4.59235e-25	-7.9631	down	--	predicted protein [Hordeum vulgare subsp. vulgare]
TraesCS2A01G095200	1.13323	0.923418	1.38189	0	0	0	1.6546e-23	-7.79753	down	--	predicted protein [Hordeum vulgare subsp. vulgare]
TraesCS2A01G095300	0.74421	1.07071	0.870977	0.025499	0	0	0.00193967	-3.55817	down	Serine/threonine-protein kinase TIO GN=F14I3.15 OS=Arabidopsis thaliana (Mouse-ear cress) PE=1 SV=1	PREDICTED: serine/threonine-protein kinase TIO [Brachypodium distachyon]
TraesCS2A01G095500	7.90168	6.59493	6.28387	0.090936	0.069275	0.051738	9.46288e-159	-6.69045	down	Lon protease homolog, mitochondrial {ECO:0000255|HAMAP-Rule:MF_03120} (Precursor) OS=Oryza sativa subsp. japonica (Rice) PE=2 SV=1	Lon protease-like protein, mitochondrial [Triticum urartu]
TraesCS2A01G095600	0.708569	0.599417	0.36415	0	0	0	1.6194e-20	-7.42798	down	Probable glutamyl endopeptidase, chloroplastic (Precursor) GN=OsJ_10563 OS=Oryza sativa subsp. japonica (Rice) PE=2 SV=1	Dipeptidyl peptidase family member 6 [Aegilops tauschii]
TraesCS2A01G096000	7.27088	6.81059	7.7473	0.014059	0	0	3.10021e-55	-9.33326	down	Aldehyde dehydrogenase 22A1 (Precursor) GN=ALDH22A1 OS=Arabidopsis thaliana (Mouse-ear cress) PE=2 SV=2	predicted protein [Hordeum vulgare subsp. vulgare]
TraesCS2A01G096300	1.76266	1.35421	1.32206	0	0	0	4.34602e-26	-8.08615	down	--	PREDICTED: NACHT, LRR and PYD domains-containing protein 13 [Brachypodium distachyon]
TraesCS2A01G096500	3.70824	2.35308	3.68818	0	0	0	1.4997e-36	-9.20055	down	Nuclear poly(A) polymerase 3 {ECO:0000303|PubMed:18479511} OS=Arabidopsis thaliana (Mouse-ear cress) PE=1 SV=1	predicted protein [Hordeum vulgare subsp. vulgare]
TraesCS2A01G096600	4.02364	4.35821	3.84275	0	0	0.014087	1.9998e-38	-7.62384	down	--	hypothetical protein TRIUR3_19075 [Triticum urartu]
TraesCS2A01G096900	2.54657	2.20751	2.14621	0	0	0	1.11157e-27	-8.25618	down	Putative F-box protein At4g22180 GN=At4g22180 OS=Arabidopsis thaliana (Mouse-ear cress) PE=4 SV=3	hypothetical protein F775_08589 [Aegilops tauschii]
TraesCS2A01G097100	2.18132	1.92806	2.0985	0	0	0	5.41328e-28	-8.28733	down	Importin subunit alpha-4 {ECO:0000305} OS=Arabidopsis thaliana (Mouse-ear cress) PE=1 SV=1	Importin subunit alpha-1 [Triticum urartu]
TraesCS2A01G097500	7.98126	7.10265	8.45881	0	0.011488	0	1.22201e-58	-9.56784	down	Transcription factor HBP-1b(c38) OS=Triticum aestivum (Wheat) PE=2 SV=1	predicted protein [Hordeum vulgare subsp. vulgare]
TraesCS2A01G097600	4.2555	4.1056	3.45429	0	0	0	4.87737e-28	-8.29953	down	Rhodanese-like/PpiC domain-containing protein 12 GN=At5g19370 OS=Arabidopsis thaliana (Mouse-ear cress) PE=2 SV=1	predicted protein [Hordeum vulgare subsp. vulgare]
TraesCS2A01G097800	9.95446	8.69104	9.20406	0	0	0	6.82531e-50	-10.2549	down	Guanine nucleotide-binding protein-like NSN1 {ECO:0000305} OS=Arabidopsis thaliana (Mouse-ear cress) PE=2 SV=1	Guanine nucleotide-binding protein-like 3-like protein [Triticum urartu]
TraesCS2A01G097900	2.30988	1.83667	2.07707	0	0	0	7.18537e-37	-9.17655	down	--	predicted protein [Hordeum vulgare subsp. vulgare]
TraesCS2A01G098000	9.37437	12.1343	7.94885	0	0	0	2.6218e-38	-9.35973	down	SNF1-related protein kinase regulatory subunit beta-1 GN=KINB1 OS=Arabidopsis thaliana (Mouse-ear cress) PE=1 SV=1	hypothetical protein F775_15351 [Aegilops tauschii]
TraesCS2A01G098100	128.087	143.289	136.224	0	0.306109	0.127985	1.6833e-32	-8.47814	down	Calmodulin GN=CAM OS=Hordeum vulgare (Barley) PE=2 SV=2	PREDICTED: calmodulin-7 isoform X1 [Vitis vinifera]
TraesCS2A01G098200	8.48786	9.29714	5.80094	0	0	0	3.28907e-37	-9.2166	down	Rhodanese-like domain-containing protein 6 GN=STR6 OS=Arabidopsis thaliana (Mouse-ear cress) PE=2 SV=1	Calmodulin-related protein [Triticum urartu]
TraesCS2A01G098300	2.11754	2.21937	1.60231	0	0	0	6.52474e-25	-7.95786	down	CBL-interacting protein kinase 31 OS=Oryza sativa subsp. japonica (Rice) PE=1 SV=1	CBL-interacting protein kinase 31 [Aegilops tauschii]
TraesCS2A01G098400	2.5161	2.68301	2.37801	0	0	0	1.26096e-32	-8.77232	down	Alpha-L-arabinofuranosidase 1 (Precursor) GN=T7M13.18 OS=Arabidopsis thaliana (Mouse-ear cress) PE=1 SV=1	Alpha-L-arabinofuranosidase 1 [Triticum urartu]
TraesCS2A01G098500	4.79305	4.82216	4.99749	0	0	0.032314	2.84214e-50	-8.06284	down	2-dehydro-3-deoxyphosphooctonate aldolase GN=KDSA OS=Pisum sativum (Garden pea) PE=2 SV=1	predicted protein [Hordeum vulgare subsp. vulgare]
TraesCS2A01G098600	0.68144	0.811446	0.746056	0	0	0	5.5608e-23	-7.71251	down	RINT1-like protein MAG2L {ECO:0000305} OS=Arabidopsis thaliana (Mouse-ear cress) PE=2 SV=1	hypothetical protein TRIUR3_14501 [Triticum urartu]
TraesCS2A01G099200	0.877396	0.898212	0.90766	0	0	0	5.29356e-24	-7.82563	down	--	hypothetical protein TRIUR3_13449 [Triticum urartu]
TraesCS2A01G099900	1.11061	0.57303	1.57061	0	0.05143	0.094607	0.00052484	-3.46582	down	ETHYLENE INSENSITIVE 3-like 1 protein GN=EIL1 OS=Arabidopsis thaliana (Mouse-ear cress) PE=1 SV=1	Os07g0685700 [Oryza sativa Japonica Group]
TraesCS2A01G100000	1.40759	1.46076	1.07651	0	0	0	6.38445e-19	-7.17706	down	Short-chain dehydrogenase/reductase 2b GN=F27D4.10 OS=Arabidopsis thaliana (Mouse-ear cress) PE=2 SV=1	Short-chain dehydrogenase/reductase 2 [Triticum urartu]
TraesCS2A01G100300	4.93631	6.25489	5.01746	0	0	0	4.02109e-38	-9.31529	down	--	PREDICTED: uncharacterized protein LOC101761304 isoform X1 [Setaria italica]
TraesCS2A01G100500	1.94764	1.68461	1.41267	0.053284	0.096282	0.028784	1.1053e-59	-4.67768	down	Nuclear pore complex protein NUP214 {ECO:0000303|PubMed:21189294} OS=Arabidopsis thaliana (Mouse-ear cress) PE=1 SV=1	hypothetical protein TRIUR3_16071 [Triticum urartu]
TraesCS2A01G100800	2.40354	3.08926	2.81115	0	0	0	4.2736e-29	-8.42591	down	Cyclic dof factor 2 GN=MIJ24.16 OS=Arabidopsis thaliana (Mouse-ear cress) PE=1 SV=2	Dof zinc finger protein DOF5.2 [Triticum urartu]
TraesCS2A01G100900	7.41411	4.45044	6.38476	0	0	0	3.68896e-31	-8.68331	down	Thioredoxin-like 1-1, chloroplastic OS=Oryza sativa subsp. japonica (Rice) PE=2 SV=1	Thioredoxin-like protein 1 [Aegilops tauschii]
TraesCS2A01G101400	1.84937	2.09288	1.60371	0	0.015307	0	3.38049e-32	-7.15735	down	NAC domain-containing protein 100 GN=NAC100 OS=Arabidopsis thaliana (Mouse-ear cress) PE=2 SV=1	NAC transcription factor [Hordeum vulgare subsp. vulgare]
TraesCS2A01G101700	79.1921	90.8886	86.7091	1.64719	5.76114	3.67692	4.5577e-126	-5.22529	down	--	hypothetical protein TRIUR3_14708 [Triticum urartu]
TraesCS2A01G101900	7.12096	5.63084	7.15951	0.013516	0	0	5.62511e-46	-8.71377	down	NAC transcription factor ONAC010 OS=Oryza sativa subsp. japonica (Rice) PE=2 SV=1	NAC domain-containing protein 29 [Triticum urartu]
TraesCS2A01G102000	14.7029	13.766	14.1391	0	0	0	1.29926e-48	-10.1525	down	NAC transcription factor 29 GN=At1g69490 OS=Arabidopsis thaliana (Mouse-ear cress) PE=2 SV=1	TPA: NAC transcription factor [Hordeum vulgare subsp. vulgare]
TraesCS2A01G102100	10.7606	11.7188	11.3124	0	0	0	4.0051e-49	-10.1985	down	Probable apyrase 2 OS=Oryza sativa subsp. japonica (Rice) PE=2 SV=1	predicted protein [Hordeum vulgare subsp. vulgare]
TraesCS2A01G102200	8.18684	6.45386	7.11309	0	0	0	7.53091e-46	-9.95575	down	--	predicted protein [Hordeum vulgare subsp. vulgare]
TraesCS2A01G102300	6.23563	6.19676	7.49188	0.009658	0.008969	0	2.54809e-83	-9.20834	down	Zinc finger CCCH domain-containing protein 53 GN=OSJNBa0008J01.35 OS=Oryza sativa subsp. japonica (Rice) PE=2 SV=1	predicted protein [Hordeum vulgare subsp. vulgare]
TraesCS2A01G102500	5.92782	8.04265	6.35091	0.119888	0.045165	0.056171	1.20606e-58	-6.3646	down	Fruit protein pKIWI502 GN=pKIWI502 OS=Actinidia deliciosa (Kiwi) PE=2 SV=1	predicted protein [Hordeum vulgare subsp. vulgare]
TraesCS2A01G102600	33.9731	29.9266	28.265	0.408715	0.408788	0.502879	0	-6.29573	down	Probable cellulose synthase A catalytic subunit 8 [UDP-forming] OS=Oryza sativa subsp. japonica (Rice) PE=2 SV=1	Putative cellulose synthase A catalytic subunit 8 (UDP-forming) [Aegilops tauschii]
TraesCS2A01G103200	9.05159	8.13649	8.16225	0.58308	0.602772	0.642702	1.07896e-169	-3.97128	down	Probable galacturonosyltransferase 7 GN=T6A23.15 OS=Arabidopsis thaliana (Mouse-ear cress) PE=1 SV=2	Glycosyltransferase QUASIMODO1 [Aegilops tauschii]
TraesCS2A01G103300	0.909278	0.74944	0.382309	0	0	0	2.98405e-19	-7.30363	down	Mediator of RNA polymerase II transcription subunit 34 GN=At1g31360 OS=Arabidopsis thaliana (Mouse-ear cress) PE=1 SV=1	ATP-dependent DNA helicase recQ [Aegilops tauschii]
TraesCS2A01G103600	48.4289	23.9273	67.8397	0	0	0	5.14715e-41	-10.1528	down	Probable calcium-binding protein CML24 OS=Oryza sativa subsp. japonica (Rice) PE=2 SV=1	PREDICTED: probable calcium-binding protein CML24 [Brachypodium distachyon]
TraesCS2A01G103900	1.87958	1.98141	1.71551	0	0	0	8.5714e-26	-8.04126	down	Cytochrome P450 714B1 OS=Oryza sativa subsp. japonica (Rice) PE=1 SV=2	PREDICTED: cytochrome P450 714B1-like [Setaria italica]
TraesCS2A01G104100	10.5272	11.3661	9.64471	0.01169	0	0	1.38361e-69	-9.70026	down	Probable inactive receptor kinase At5g58300 (Precursor) GN=At5g58300 OS=Arabidopsis thaliana (Mouse-ear cress) PE=2 SV=1	Putative inactive receptor kinase [Aegilops tauschii]
TraesCS2A01G104400	2.49325	2.40678	2.4656	0	0	0	1.69094e-35	-9.04473	down	--	Putative nuclease HARBI1 [Triticum urartu]
TraesCS2A01G104500	5.61277	5.59315	5.4215	0	0	0	3.44559e-40	-9.46707	down	Serine/threonine-protein kinase AtPK2/AtPK19 GN=F17O14.19 OS=Arabidopsis thaliana (Mouse-ear cress) PE=1 SV=2	predicted protein [Hordeum vulgare subsp. vulgare]
TraesCS2A01G104600	2.07901	2.13195	1.91604	0	0	0	8.77901e-34	-8.88472	down	Uncharacterized protein At5g05190 GN=Y-1 OS=Arabidopsis thaliana (Mouse-ear cress) PE=1 SV=1	predicted protein [Hordeum vulgare subsp. vulgare]
TraesCS2A01G104700	3.06935	2.3939	2.92173	0	0.005719	0	5.35417e-62	-9.31236	down	Putative SWI/SNF-related matrix-associated actin-dependent regulator of chromatin subfamily A member 3-like 2 GN=At5g22750 OS=Arabidopsis thaliana (Mouse-ear cress) PE=2 SV=1	E3 ubiquitin-protein ligase SHPRH [Triticum urartu]
TraesCS2A01G105100	4.98914	2.34949	3.07794	0	0	0	7.9629e-57	-10.8305	down	--	hypothetical protein TRIUR3_26594 [Triticum urartu]
TraesCS2A01G105300	0.854626	0.824786	1.1128	0	0	0	2.88993e-19	-7.22857	down	Probable tRNA (guanine(26)-N(2))-dimethyltransferase 1 GN=At5g15810 OS=Arabidopsis thaliana (Mouse-ear cress) PE=2 SV=3	predicted protein [Hordeum vulgare subsp. vulgare]
TraesCS2A01G105400	67.4329	78.8593	71.0327	0	0	0	1.66309e-64	-11.2787	down	Ubiquinol-cytochrome c reductase complex 6.7 kDa protein OS=Solanum tuberosum (Potato) PE=1 SV=2	hypothetical protein F775_29331 [Aegilops tauschii]
TraesCS2A01G105500	38.3918	44.603	50.2141	0.0594	0.01386	0	1.36766e-27	-8.69809	down	Vacuolar-sorting receptor 1 (Precursor) GN=F8J2.20 OS=Arabidopsis thaliana (Mouse-ear cress) PE=1 SV=2	Vacuolar-sorting receptor 1 [Triticum urartu]
TraesCS2A01G105600	6.13925	5.6272	5.25939	0.020753	0	0.016716	1.5461e-98	-8.18029	down	B3 domain-containing protein Os07g0679700 GN=OJ1205_F02.12 OS=Oryza sativa subsp. japonica (Rice) PE=2 SV=1	predicted protein [Hordeum vulgare subsp. vulgare]
TraesCS2A01G105700	4.17181	2.87556	4.10112	0	0	0	4.33179e-29	-8.44233	down	Transcription factor RF2b GN=RF2b OS=Oryza sativa subsp. japonica (Rice) PE=1 SV=1	predicted protein [Hordeum vulgare subsp. vulgare]
TraesCS2A01G105900	1.82115	1.75315	3.50382	0	0	0	4.76462e-24	-7.94413	down	Alpha-galactosidase (Precursor) OS=Coffea arabica (Arabian coffee) PE=1 SV=1	predicted protein [Hordeum vulgare subsp. vulgare]
TraesCS2A01G106100	9.3798	12.5079	10.8169	0	0	0	2.4625e-30	-8.56241	down	Actin-related protein 2/3 complex subunit 5A GN=T15B16.22 OS=Arabidopsis thaliana (Mouse-ear cress) PE=1 SV=2	actin-related protein 2/3 complex subunit 5 [Triticum aestivum]
TraesCS2A01G106500	9.64895	9.40069	11.9769	0	0.024902	0.048386	5.21576e-75	-8.30451	down	CBL-interacting protein kinase 29 OS=Oryza sativa subsp. japonica (Rice) PE=2 SV=1	CBL-interacting protein kinase 29 [Triticum aestivum]
TraesCS2A01G106600	0.654027	0.67556	0.619967	0	0	0	3.56779e-17	-6.90551	down	WEB family protein At2g38370 GN=At2g38370 OS=Arabidopsis thaliana (Mouse-ear cress) PE=2 SV=1	hypothetical protein TRIUR3_13401 [Triticum urartu]
TraesCS2A01G106800	3.0718	2.98511	3.02179	0	0	0	1.18287e-32	-8.77066	down	Thiamine pyrophosphokinase 2 OS=Oryza sativa subsp. japonica (Rice) PE=2 SV=1	predicted protein [Hordeum vulgare subsp. vulgare]
TraesCS2A01G106900	31.3031	29.2551	21.8891	0	0	0	6.98608e-38	-9.30294	down	--	hypothetical protein TRIUR3_19930 [Triticum urartu]
TraesCS2A01G107100	1.52209	1.66214	1.83756	0	0	0	2.5846e-31	-8.65096	down	Probable potassium transporter 9 GN=OJ1409_C08.19 OS=Oryza sativa subsp. japonica (Rice) PE=2 SV=1	predicted protein [Hordeum vulgare subsp. vulgare]
TraesCS2A01G108900	139.782	137.26	128.553	1.42769	1.12309	1.61206	0	-6.76385	down	60S ribosomal protein L19-2 GN=RPL19B OS=Arabidopsis thaliana (Mouse-ear cress) PE=2 SV=1	predicted protein [Hordeum vulgare subsp. vulgare]
TraesCS2A01G109500	2.37099	2.524	2.35495	0.025791	0	0	4.81374e-31	-7.01692	down	--	predicted protein [Hordeum vulgare subsp. vulgare]
TraesCS2A01G109600	2.86259	2.91295	3.13542	0	0	0	2.94373e-35	-9.02718	down	Pectinesterase 3 (Precursor) OS=Citrus sinensis (Sweet orange) PE=1 SV=1	PREDICTED: pectinesterase 3-like [Setaria italica]
TraesCS2A01G109900	53.3932	47.883	41.5146	0	0	0	6.32918e-58	-10.8505	down	60S ribosomal protein L18-2 GN=RPL18B OS=Arabidopsis thaliana (Mouse-ear cress) PE=1 SV=2	60S ribosomal protein L18-2 [Triticum urartu]
TraesCS2A01G110500	69.3181	72.7075	68.9496	0.146969	0.086103	0	6.3096e-39	-8.59345	down	60S ribosomal protein L22-2 GN=RPL22B OS=Arabidopsis thaliana (Mouse-ear cress) PE=2 SV=1	60S ribosomal protein L22-2 [Triticum urartu]
TraesCS2A01G110600	3.936	2.27097	3.29802	0.08768	0	0.143108	1.41824e-24	-5.07561	down	UPF0235 protein At5g63440 GN=At5g63440 OS=Arabidopsis thaliana (Mouse-ear cress) PE=1 SV=1	hypothetical protein TRIUR3_04614 [Triticum urartu]
TraesCS2A01G110700	24.3782	23.9238	21.2334	0	0	0	1.95144e-46	-9.99127	down	DNA-directed RNA polymerases II, IV and V subunit 8B GN=T16L24.150 OS=Arabidopsis thaliana (Mouse-ear cress) PE=1 SV=1	DNA-directed RNA polymerases I, II, and III subunit rpabc3 [Triticum urartu]
TraesCS2A01G111200	1.22846	0.947249	0.994599	0	0	0	3.77076e-17	-6.91034	down	F-box/kelch-repeat protein SKIP6 GN=SKIP6 OS=Arabidopsis thaliana (Mouse-ear cress) PE=1 SV=1	F-box/kelch-repeat protein SKIP6 [Triticum urartu]
TraesCS2A01G111300	209.268	40.1659	211.965	0.955315	0.379161	1.91639	3.61325e-15	-6.11958	down	--	predicted protein [Hordeum vulgare subsp. vulgare]
TraesCS2A01G111500	1.21679	0.876233	1.49455	0	0	0	1.63264e-22	-7.69074	down	Fructokinase-like 2, chloroplastic {ECO:0000312|EMBL:AEE34893.1} (Precursor) OS=Arabidopsis thaliana (Mouse-ear cress) PE=1 SV=2	hypothetical protein TRIUR3_20910 [Triticum urartu]
TraesCS2A01G111600	30.3256	29.7326	29.0249	7.9869	6.6616	7.46684	8.8254e-89	-2.20291	down	Serine/arginine-rich splicing factor SR30 GN=T12M4.19 OS=Arabidopsis thaliana (Mouse-ear cress) PE=1 SV=1	alternative splicing regulator [Triticum aestivum]
TraesCS2A01G111900	2.7869	0.816689	1.07159	0	0	0.018835	5.87412e-22	-6.56406	down	F-box protein At5g07610 GN=At5g07610 OS=Arabidopsis thaliana (Mouse-ear cress) PE=2 SV=1	F-box protein related to abiotic stress 2 [Triticum aestivum]
TraesCS2A01G112000	1.34263	1.43744	1.33771	0	0	0	2.34759e-16	-6.78028	down	F-box protein At5g07610 GN=At5g07610 OS=Arabidopsis thaliana (Mouse-ear cress) PE=2 SV=1	putative receptor kinase [Triticum aestivum]
TraesCS2A01G112300	27.1284	25.5057	26.9514	0.234237	0.264203	0.133568	1.34568e-253	-7.08842	down	Protein AIG1 GN=AIG1 OS=Arabidopsis thaliana (Mouse-ear cress) PE=2 SV=1	Protein AIG1 [Triticum urartu]
TraesCS2A01G112400	5.239	7.23718	7.27847	0	0	0	1.50927e-27	-8.2746	down	Universal stress protein A-like protein GN=At3g01520 OS=Arabidopsis thaliana (Mouse-ear cress) PE=1 SV=2	Universal stress protein A-like protein [Triticum urartu]
TraesCS2A01G112500	1.37618	1.56352	1.65889	0	0	0	4.97102e-17	-6.8898	down	Universal stress protein A-like protein GN=At3g01520 OS=Arabidopsis thaliana (Mouse-ear cress) PE=1 SV=2	Universal stress protein A-like protein [Triticum urartu]
TraesCS2A01G112600	2.4285	2.96478	2.50589	0	0	0	1.85185e-22	-7.64363	down	Universal stress protein A-like protein GN=At3g01520 OS=Arabidopsis thaliana (Mouse-ear cress) PE=1 SV=2	Universal stress protein A-like protein [Triticum urartu]
TraesCS2A01G112700	8.14473	7.27266	6.20897	0	0	0	1.86794e-42	-9.68274	down	--	hypothetical protein F775_26004 [Aegilops tauschii]
TraesCS2A01G112800	1.60593	1.96088	1.15909	0	0	0	5.19705e-19	-7.21343	down	Probable E3 ubiquitin-protein ligase BAH1-like 1 GN=OsI_27296 OS=Oryza sativa subsp. indica (Rice) PE=3 SV=1	E3 ubiquitin-protein ligase BAH1 [Aegilops tauschii]
TraesCS2A01G113100	15.0344	15.39	14.8378	0	0	0	1.76874e-44	-9.82739	down	--	Ribosome biogenesis NSA2-like protein [Aegilops tauschii]
TraesCS2A01G113200	2.6406	1.99177	3.27891	0	0	0	1.3415e-27	-8.2966	down	--	predicted protein [Hordeum vulgare subsp. vulgare]
TraesCS2A01G113600	3.5208	4.80228	2.83761	0.015582	0	0	4.75626e-27	-7.64972	down	Steroid 5-alpha-reductase DET2 GN=DET2 OS=Gossypium hirsutum (Upland cotton) PE=1 SV=1	Trans-2,3-enoyl-CoA reductase [Aegilops tauschii]
TraesCS2A01G113900	10.9321	9.19233	10.3903	0.437478	0.482248	0.602483	7.48308e-188	-4.26085	down	Katanin p60 ATPase-containing subunit A1 {ECO:0000255|HAMAP-Rule:MF_03023} GN=At1g80350 OS=Arabidopsis thaliana (Mouse-ear cress) PE=1 SV=1	PREDICTED: uncharacterized protein LOC102705092 [Oryza brachyantha]
TraesCS2A01G114000	27.1114	31.4211	28.377	0.737457	0.472693	0.641857	2.98013e-212	-5.67547	down	Stress-related protein GN=SRP OS=Vitis riparia (Frost grape) PE=2 SV=1	hypothetical protein TRIUR3_15978 [Triticum urartu]
TraesCS2A01G114100	5.75733	5.3551	4.49867	0.900119	1.01509	1.01263	3.3763e-40	-2.20457	down	Probable histone-arginine methyltransferase CARM1 OS=Oryza sativa subsp. japonica (Rice) PE=2 SV=1	putative histone-arginine methyltransferase CARM1 [Triticum urartu]
TraesCS2A01G114400	194.131	74.5415	189.517	37.9093	40.2479	44.0336	1.76258e-10	-2.06439	down	Photosystem I reaction center subunit N, chloroplastic (Precursor) GN=PSAN OS=Hordeum vulgare (Barley) PE=2 SV=1	RecName: Full=Photosystem I reaction center subunit N, chloroplastic; Short=PSI-N; Flags: Precursor [Hordeum vulgare]
TraesCS2A01G115000	0.976199	0.776941	0.924532	0	0	0	2.80224e-23	-7.73937	down	Probable indole-3-acetic acid-amido synthetase GH3.11 GN=GH3.11 OS=Oryza sativa subsp. japonica (Rice) PE=2 SV=1	hypothetical protein TRIUR3_17511 [Triticum urartu]
TraesCS2A01G115100	25.9949	26.0612	22.6464	0	0	0	9.48828e-53	-10.4713	down	40S ribosomal protein S21 GN=RPS21 OS=Zea mays (Maize) PE=3 SV=1	40S ribosomal protein S21 [Aegilops tauschii]
TraesCS2A01G115200	2.35513	2.14554	2.60926	0	0	0	1.26059e-25	-8.02725	down	Autophagy-related protein 18a GN=ATG18A OS=Arabidopsis thaliana (Mouse-ear cress) PE=1 SV=1	hypothetical protein F775_13211 [Aegilops tauschii]
TraesCS2A01G115400	1.69462	0.97267	3.31694	0	0	0	6.1766e-29	-8.55571	down	--	hypothetical protein F775_13213 [Aegilops tauschii]
TraesCS2A01G116100	1.90264	1.89667	1.88248	0	0	0	1.47798e-25	-8.0098	down	Transcription factor BOA GN=F2O15.230 OS=Arabidopsis thaliana (Mouse-ear cress) PE=2 SV=1	Two-component response regulator ARR2 [Aegilops tauschii]
TraesCS2A01G116600	2.2635	3.90279	2.70813	0.058644	0.090568	0.02253	1.13805e-45	-5.5953	down	--	MORC family CW-type zinc finger protein 4 [Aegilops tauschii]
TraesCS2A01G116700	6.13522	6.27504	5.7156	0	0.073042	0.066127	1.29916e-10	-5.58376	down	Potassium transporter 7 GN=P0625E02.129 OS=Oryza sativa subsp. japonica (Rice) PE=2 SV=3	Potassium transporter 7 [Aegilops tauschii]
TraesCS2A01G116800	9.71961	9.54062	7.52698	0.03545	0	0	1.27499e-40	-7.86642	down	--	hypothetical protein F775_29952 [Aegilops tauschii]
TraesCS2A01G117000	2.33834	1.81492	2.82526	0.057284	0.017935	0.02988	1.72913e-58	-5.9605	down	Probable GTP-binding protein OBGC1, chloroplastic (Precursor) GN=P0625E02.120 OS=Oryza sativa subsp. japonica (Rice) PE=3 SV=1	PREDICTED: probable GTP-binding protein OBGC1, chloroplastic [Brachypodium distachyon]
TraesCS2A01G117100	4.71363	4.44869	4.23848	0	0	0	6.56502e-36	-9.08468	down	--	hypothetical protein TRIUR3_12173 [Triticum urartu]
TraesCS2A01G117300	63.8233	65.5642	47.154	0.301985	0.294128	0.090133	4.27821e-141	-7.98834	down	Xylose isomerase GN=XYLA OS=Hordeum vulgare (Barley) PE=1 SV=1	predicted protein [Hordeum vulgare subsp. vulgare]
TraesCS2A01G117400	0.735066	0.660686	0.668529	0	0.025395	0	0.00991873	-3.07823	down	DNA polymerase zeta catalytic subunit GN=REV3 OS=Arabidopsis thaliana (Mouse-ear cress) PE=2 SV=1	DNA polymerase zeta catalytic subunit [Aegilops tauschii]
TraesCS2A01G117500	4.08768	5.14743	2.61646	0	0	0	6.28679e-34	-8.96315	down	Hsp70-Hsp90 organizing protein GN=HOP OS=Triticum aestivum (Wheat) PE=1 SV=1	Ankyrin repeat and protein kinase domain-containing protein 1 [Triticum urartu]
TraesCS2A01G117600	5.57132	5.5751	6.30322	0	0	0	4.45829e-39	-9.4146	down	Ankyrin repeat domain-containing protein EMB506, chloroplastic (Precursor) GN=EMB506 OS=Arabidopsis thaliana (Mouse-ear cress) PE=1 SV=1	Ankyrin repeat, PH and SEC7 domain containing protein secG [Triticum urartu]
TraesCS2A01G117800	1.87651	1.77615	1.83343	0.435957	0.367581	0.356207	7.654e-29	-2.35102	down	Serine/threonine-protein kinase CDL1 {ECO:0000305} OS=Arabidopsis thaliana (Mouse-ear cress) PE=1 SV=1	Serine/threonine-protein kinase PBS1 [Aegilops tauschii]
TraesCS2A01G118200	2.40648	1.98734	2.72428	0	0	0	3.85074e-20	-7.34736	down	--	hypothetical protein F775_04654 [Aegilops tauschii]
TraesCS2A01G118300	4.94845	4.32531	4.81108	0	0	0	1.36043e-46	-10.0022	down	Receptor-like protein kinase HSL1 (Precursor) GN=HSL1 OS=Arabidopsis thaliana (Mouse-ear cress) PE=2 SV=1	Receptor-like protein kinase HSL1 [Aegilops tauschii]
TraesCS2A01G118700	7.0009	7.19644	6.50628	0.284433	0.026687	0	0.00105959	-3.66452	down	--	predicted protein [Hordeum vulgare subsp. vulgare]
TraesCS2A01G119300	6.35747	5.99465	7.34274	0.16377	0.232093	0.380142	1.65102e-76	-4.78014	down	Probable serine/threonine-protein kinase At1g54610 GN=At1g54610 OS=Arabidopsis thaliana (Mouse-ear cress) PE=1 SV=1	predicted protein [Hordeum vulgare subsp. vulgare]
TraesCS2A01G119400	23.1524	20.0063	20.4463	0.116997	0.024711	0	5.03865e-12	-6.35935	down	Probable nucleolar protein 5-2 GN=T12H1.2 OS=Arabidopsis thaliana (Mouse-ear cress) PE=2 SV=1	hypothetical protein TRIUR3_04158 [Triticum urartu]
TraesCS2A01G119500	2.96116	3.56919	2.9125	0	0	0	3.82915e-29	-8.42555	down	--	Os07g0667400 [Oryza sativa Japonica Group]
TraesCS2A01G119600	8.11997	7.85421	4.94284	0	0	0	1.5229e-45	-9.95151	down	Zinc finger protein CONSTANS-LIKE 13 GN=COL13 OS=Arabidopsis thaliana (Mouse-ear cress) PE=2 SV=1	predicted protein [Hordeum vulgare subsp. vulgare]
TraesCS2A01G119700	6.50037	4.4219	5.66188	0	0	0	5.91347e-29	-8.4212	down	--	hypothetical protein F775_25092 [Aegilops tauschii]
TraesCS2A01G119800	11.4488	10.7796	10.2273	0	0	0	1.35561e-34	-8.96092	down	--	hypothetical protein F775_25268 [Aegilops tauschii]
TraesCS2A01G119900	1.88627	2.51344	1.94811	0	0	0	1.10504e-19	-7.28158	down	--	hypothetical protein F775_21695 [Aegilops tauschii]
TraesCS2A01G120000	9.21078	6.41884	6.84721	0	0.024577	0	5.91724e-42	-7.99052	down	--	hypothetical protein TRIUR3_13527 [Triticum urartu]
TraesCS2A01G120300	5.84633	5.13496	6.14152	0	0	0	2.54074e-31	-8.65901	down	--	hypothetical protein F775_25093 [Aegilops tauschii]
TraesCS2A01G120400	1.7081	1.32995	1.7641	0	0	0	2.17484e-17	-6.95228	down	--	hypothetical protein TRIUR3_09605 [Triticum urartu]
TraesCS2A01G120500	5.72119	2.68666	6.64404	0	0	0	4.74972e-25	-8.08783	down	--	hypothetical protein F775_25092 [Aegilops tauschii]
TraesCS2A01G120800	12.8489	15.9899	16.1788	0	0	0	3.24743e-55	-10.677	down	Inactive beta-amylase 9 GN=T1A4.50 OS=Arabidopsis thaliana (Mouse-ear cress) PE=2 SV=1	predicted protein [Hordeum vulgare subsp. vulgare]
TraesCS2A01G120900	1.07024	1.17289	1.04728	0	0	0	2.16076e-19	-7.23427	down	Tubby-like F-box protein 11 OS=Oryza sativa subsp. japonica (Rice) PE=2 SV=1	predicted protein [Hordeum vulgare subsp. vulgare]
TraesCS2A01G121100	1.60054	1.91684	1.69733	0	0	0	4.03539e-24	-7.85485	down	--	hypothetical protein TRIUR3_30807 [Triticum urartu]
TraesCS2A01G121200	98.2808	96.26	115.661	0	0	0	4.93548e-85	-12.4773	down	Superoxide dismutase [Cu-Zn] 4A GN=SODCC.3 OS=Zea mays (Maize) PE=2 SV=2	superoxide dismutase [Triticum aestivum]
TraesCS2A01G122000	7.72065	6.60036	6.62669	0.485255	0.807693	0.467297	3.515e-55	-3.70111	down	Probable membrane-associated 30 kDa protein, chloroplastic (Precursor) OS=Oryza sativa subsp. japonica (Rice) PE=1 SV=1	hypothetical protein TRIUR3_21449 [Triticum urartu]
TraesCS2A01G122200	0.924487	1.05359	1.13679	0	0.015926	0	2.4622e-34	-6.99698	down	Putative Pol polyprotein from transposon element Bs1 OS=Zea mays (Maize) PE=3 SV=1	Endo-1,4-beta-xylanase Z [Triticum urartu]
TraesCS2A01G122400	12.5407	13.6731	11.6599	0.229775	0	0.123594	1.44739e-84	-7.07025	down	Splicing factor U2af large subunit A GN=U2AF65A OS=Oryza sativa subsp. japonica (Rice) PE=2 SV=2	Splicing factor U2af large subunit A [Aegilops tauschii]
TraesCS2A01G122500	6.20662	5.71931	2.10961	0	0	0	3.07012e-20	-7.49739	down	--	hypothetical protein F775_26326 [Aegilops tauschii]
TraesCS2A01G122600	9.68533	11.923	11.5369	0.006498	0	0	4.27626e-87	-10.6736	down	Cellulose synthase-like protein D3 OS=Oryza sativa subsp. japonica (Rice) PE=2 SV=2	Cellulose synthase-like protein D3 [Aegilops tauschii]
TraesCS2A01G123800	61.6777	79.4462	66.9317	0.518527	0.18818	0.284395	4.37873e-141	-7.65426	down	4-alpha-glucanotransferase DPE2 GN=P0453E03.120 OS=Oryza sativa subsp. japonica (Rice) PE=2 SV=1	predicted protein [Hordeum vulgare subsp. vulgare]
TraesCS2A01G123900	1.0362	1.08376	0.827596	0	0	0	1.90897e-16	-6.80055	down	--	PREDICTED: uncharacterized protein LOC102720540 [Oryza brachyantha]
TraesCS2A01G124300	5.81967	3.95854	4.28674	0	0.040696	0.046891	1.82678e-43	-6.7203	down	--	--
TraesCS2A01G124400	1.26261	1.24665	1.31992	0.218179	0.206038	0.271944	4.57233e-19	-2.57749	down	--	PREDICTED: uncharacterized protein LOC100822930 [Brachypodium distachyon]
TraesCS2A01G124700	2.45632	2.48265	2.00208	0	0.031467	0.138122	7.42882e-06	-4.17842	down	--	predicted protein [Hordeum vulgare subsp. vulgare]
TraesCS2A01G124800	1.42942	1.21328	1.04174	0	0.006536	0	3.7937e-38	-7.69431	down	--	predicted protein [Hordeum vulgare subsp. vulgare]
TraesCS2A01G124900	8.27189	9.01961	7.92581	0	0	0	2.57954e-35	-9.03425	down	--	hypothetical protein F775_28676 [Aegilops tauschii]
TraesCS2A01G125100	9.34108	10.2312	7.73075	0	0	0	4.05034e-48	-10.1461	down	Secologanin synthase GN=CYP72A1 OS=Catharanthus roseus (Madagascar periwinkle) PE=2 SV=1	Secologanin synthase [Triticum urartu]
TraesCS2A01G125200	83.1425	79.6161	74.3075	0.591581	0.687437	0.632689	0	-7.10846	down	Elongation factor 1-beta OS=Triticum aestivum (Wheat) PE=1 SV=2	predicted protein [Hordeum vulgare subsp. vulgare]
TraesCS2A01G125400	6.35916	5.52469	6.02025	0	0	0	4.08142e-39	-9.37838	down	Probable nucleolar protein 5-2 GN=T12H1.2 OS=Arabidopsis thaliana (Mouse-ear cress) PE=2 SV=1	hypothetical protein TRIUR3_03791 [Triticum urartu]
TraesCS2A01G125500	15.4922	13.6683	12.2752	0	0	0	1.11763e-54	-10.6195	down	Probable nucleolar protein 5-2 GN=T12H1.2 OS=Arabidopsis thaliana (Mouse-ear cress) PE=2 SV=1	predicted protein [Hordeum vulgare subsp. vulgare]
TraesCS2A01G125700	5.99957	5.53805	5.19395	0	0	0	3.63666e-28	-8.30665	down	--	hypothetical protein TRIUR3_27355 [Triticum urartu]
TraesCS2A01G126100	4.17997	5.21928	3.74612	0	0	0	1.05888e-19	-7.2897	down	Cysteine proteinase inhibitor 8 (Precursor) OS=Oryza sativa subsp. japonica (Rice) PE=2 SV=1	cysteine proteinase inhibitor [Secale cereale x Triticum aestivum]
TraesCS2A01G126700	7.08678	5.34869	6.03649	0	0	0	6.08161e-37	-9.20045	down	Protein Mut11 GN=Mut11 OS=Chlamydomonas reinhardtii (Chlamydomonas smithii) PE=2 SV=1	Angio-associated migratory cell protein [Triticum urartu]
TraesCS2A01G126800	4.95059	3.70626	3.31107	0	0	0	7.49629e-35	-9.02723	down	Putative SWI/SNF-related matrix-associated actin-dependent regulator of chromatin subfamily A member 3-like 3 GN=At5g43530 OS=Arabidopsis thaliana (Mouse-ear cress) PE=3 SV=1	PREDICTED: E3 ubiquitin-protein ligase RNF8-B-like [Brachypodium distachyon]
TraesCS2A01G126900	3.07063	2.65075	2.85869	0	0.00527	0.007825	3.43118e-85	-8.58126	down	Protein CHROMATIN REMODELING 4 {ECO:0000303|PubMed:16547115} OS=Arabidopsis thaliana (Mouse-ear cress) PE=2 SV=1	hypothetical protein F775_52258 [Aegilops tauschii]
TraesCS2A01G127100	28.9428	20.4276	27.5988	0.014549	0.111368	0	3.25201e-26	-7.64785	down	Protein EARLY RESPONSIVE TO DEHYDRATION 15 OS=Arabidopsis thaliana (Mouse-ear cress) PE=1 SV=1	predicted protein [Hordeum vulgare subsp. vulgare]
TraesCS2A01G127200	14.3912	13.2993	12.0098	0.200929	0.186424	0.256542	8.17459e-252	-6.25311	down	Ubiquitin carboxyl-terminal hydrolase 24 GN=UBP24 OS=Arabidopsis thaliana (Mouse-ear cress) PE=1 SV=1	Ubiquitin carboxyl-terminal hydrolase 24 [Aegilops tauschii]
TraesCS2A01G127300	4.61318	4.60895	4.6313	0.016621	0.014295	0.082048	1.18272e-80	-6.69304	down	--	predicted protein [Hordeum vulgare subsp. vulgare]
TraesCS2A01G127500	1.25358	0.62621	0.599586	0	0	0	3.0734e-16	-6.82501	down	--	Adenosine deaminase-like protein [Aegilops tauschii]
TraesCS2A01G127600	3.70547	3.63221	3.08773	0	0	0	2.68381e-29	-8.4341	down	--	PREDICTED: adenosine deaminase-like protein [Brachypodium distachyon]
TraesCS2A01G128100	1.52097	1.7229	1.22457	0	0	0	6.26141e-24	-7.8341	down	RNA pseudouridine synthase 6, chloroplastic (Precursor) OS=Oryza sativa subsp. japonica (Rice) PE=2 SV=1	PREDICTED: RNA pseudouridine synthase 6, chloroplastic [Brachypodium distachyon]
TraesCS2A01G128300	4.39391	4.05469	3.5332	0.015693	0	0	8.90815e-41	-8.29545	down	--	predicted protein [Hordeum vulgare subsp. vulgare]
TraesCS2A01G128400	11.0705	8.98853	9.09422	0.633937	2.19862	0.673791	3.15201e-166	-3.85742	down	Protein CHROMATIN REMODELING 5 {ECO:0000303|PubMed:16547115} OS=Arabidopsis thaliana (Mouse-ear cress) PE=3 SV=1	predicted protein [Hordeum vulgare subsp. vulgare]
TraesCS2A01G128700	7.79891	6.54103	5.23874	0	0.02493	0	1.47089e-49	-8.55909	down	DEAD-box ATP-dependent RNA helicase 10 OS=Oryza sativa subsp. japonica (Rice) PE=2 SV=1	predicted protein [Hordeum vulgare subsp. vulgare]
TraesCS2A01G129000	1.60432	1.51295	1.68487	0	0	0	3.04908e-25	-7.9755	down	E3 ubiquitin-protein ligase SINAT5 GN=SINAT5 OS=Arabidopsis thaliana (Mouse-ear cress) PE=1 SV=2	E3 ubiquitin-protein ligase SINAT5 [Triticum urartu]
TraesCS2A01G129100	4.50839	4.49022	4.43337	0	0	0	3.34596e-28	-8.3072	down	F-box protein SKIP5 GN=SKIP5 OS=Arabidopsis thaliana (Mouse-ear cress) PE=1 SV=1	PREDICTED: F-box protein SKIP5 [Brachypodium distachyon]
TraesCS2A01G129600	4.38542	5.07712	4.04362	0	0	0	2.86704e-41	-9.58362	down	Probable complex I intermediate-associated protein 30 GN=At1g17350 OS=Arabidopsis thaliana (Mouse-ear cress) PE=1 SV=2	PREDICTED: uncharacterized protein LOC100826457 [Brachypodium distachyon]
TraesCS2A01G129900	1.1485	1.11282	1.31053	0	0	0	2.3252e-31	-8.65098	down	--	Condensin complex subunit 1 [Triticum urartu]
TraesCS2A01G130200	18.714	23.8334	21.4971	0	0	0.023418	5.29371e-61	-9.76399	down	--	predicted protein [Hordeum vulgare subsp. vulgare]
TraesCS2A01G130600	16.1028	15.7758	15.7006	0.022966	0.347203	0.054679	5.07119e-227	-8.20647	down	Ferredoxin-dependent glutamate synthase, chloroplastic (Precursor) OS=Oryza sativa subsp. japonica (Rice) PE=2 SV=2	ferredoxin-dependent glutamate synthase [Secale cereale x Triticum turgidum subsp. durum]
TraesCS2A01G130700	10.8381	9.43953	8.21523	0	0	0	4.58512e-34	-8.91804	down	Ankyrin repeat domain-containing protein 2 GN=F15J1.20 OS=Arabidopsis thaliana (Mouse-ear cress) PE=1 SV=2	Protein TANC2 [Triticum urartu]
TraesCS2A01G130800	1.2962	1.2231	0.89747	0	0	0	2.02263e-25	-8.0064	down	Phosphatidylinositol 4-phosphate 5-kinase 4 GN=PIP5K4 OS=Arabidopsis thaliana (Mouse-ear cress) PE=3 SV=1	predicted protein [Hordeum vulgare subsp. vulgare]
TraesCS2A01G130900	13.572	10.476	19.5089	0.186023	0.17779	0.125903	1.11152e-92	-6.4622	down	Protein ASPARTIC PROTEASE IN GUARD CELL 2 (Precursor) GN=ASPG2 OS=Arabidopsis thaliana (Mouse-ear cress) PE=2 SV=1	predicted protein [Hordeum vulgare subsp. vulgare]
TraesCS2A01G131300	3.10579	2.51995	3.85572	0	0	0	1.12472e-24	-7.93996	down	CASP-like protein 5A3 OS=Zea mays (Maize) PE=2 SV=1	predicted protein [Hordeum vulgare subsp. vulgare]
TraesCS2A01G131400	8.24938	8.73872	7.85411	0.370026	0.250023	0	0.00427159	-3.26609	down	Rho GTPase-activating protein 7 GN=ROPGAP7 OS=Arabidopsis thaliana (Mouse-ear cress) PE=2 SV=1	Rho GTPase-activating protein 24 [Triticum urartu]
TraesCS2A01G131500	4.72179	4.11485	3.94955	0.386966	0.315277	0.66429	3.973e-50	-3.6396	down	--	predicted protein [Hordeum vulgare subsp. vulgare]
TraesCS2A01G131800	10.3808	11.0976	9.18608	0	0.014236	0	1.44831e-58	-9.57382	down	30S ribosomal protein S9, chloroplastic GN=rps9 OS=Cyanidium caldarium PE=3 SV=1	30S ribosomal protein S9 [Triticum urartu]
TraesCS2A01G131900	13.9561	16.7216	14.0768	0	0	0	6.56213e-33	-8.81137	down	--	predicted protein [Hordeum vulgare subsp. vulgare]
TraesCS2A01G132100	2.44964	1.74717	2.80934	0	0.0187	0.020784	1.09484e-38	-6.23472	down	--	predicted protein [Hordeum vulgare subsp. vulgare]
TraesCS2A01G132200	2.92176	3.04908	2.50358	0	0	0	2.70301e-34	-8.94794	down	Thioredoxin reductase NTRC (Precursor) OS=Oryza sativa subsp. japonica (Rice) PE=1 SV=2	Thioredoxin reductase [Aegilops tauschii]
TraesCS2A01G132400	0.842219	0.579345	0.916007	0	0	0	2.40483e-16	-6.80297	down	--	hypothetical protein F775_22747 [Aegilops tauschii]
TraesCS2A01G132500	2.0776	2.09641	2.41636	0	0	0	7.82092e-22	-7.5547	down	--	hypothetical protein F775_30930 [Aegilops tauschii]
TraesCS2A01G132600	8.29395	8.27948	5.47922	0.397096	0.664916	0.606029	2.17217e-54	-3.8671	down	--	PREDICTED: uncharacterized protein LOC101759818 [Setaria italica]
TraesCS2A01G132900	26.9888	25.0013	23.6957	0.984415	1.12856	1.07325	0	-4.7163	down	Protein transport protein SEC31 homolog B {ECO:0000305} OS=Arabidopsis thaliana (Mouse-ear cress) PE=1 SV=1	predicted protein [Hordeum vulgare subsp. vulgare]
TraesCS2A01G133200	1.09145	1.13083	1.33822	0	0	0	1.88258e-20	-7.38231	down	--	hypothetical protein F775_21995 [Aegilops tauschii]
TraesCS2A01G133300	41.5712	37.6583	21.2403	0.045514	0.126661	0.053801	6.83255e-116	-8.67476	down	3-oxoacyl-[acyl-carrier-protein] synthase I, chloroplastic (Precursor) GN=KAS12 OS=Hordeum vulgare (Barley) PE=1 SV=1	predicted protein [Hordeum vulgare subsp. vulgare]
TraesCS2A01G133400	1.9812	3.39507	1.90331	0	0	0	9.86827e-26	-8.11881	down	3-oxoacyl-[acyl-carrier-protein] synthase I, chloroplastic (Precursor) GN=KAS12 OS=Hordeum vulgare (Barley) PE=1 SV=1	3-oxoacyl-(acyl-carrier-protein) synthase I, chloroplastic [Aegilops tauschii]
TraesCS2A01G133800	1.47274	1.69009	1.62426	0.527426	0.184888	0.420551	3.92495e-10	-2.11264	down	Probable thiol methyltransferase 2 GN=HOL3 OS=Arabidopsis thaliana (Mouse-ear cress) PE=1 SV=1	PREDICTED: methyltransferase-like protein 13 [Brachypodium distachyon]
TraesCS2A01G133900	7.36493	5.90388	7.793	0	0	0	5.09037e-34	-8.92821	down	--	predicted protein [Hordeum vulgare subsp. vulgare]
TraesCS2A01G134000	34.8481	30.8866	35.5638	0.728826	0.943088	1.51781	2.4822e-99	-5.12652	down	Magnesium-chelatase subunit ChlH, chloroplastic (Precursor) GN=CHLH OS=Oryza sativa subsp. indica (Rice) PE=3 SV=1	Mg-chelatase subunit XANTHA-F [Hordeum vulgare subsp. vulgare]
TraesCS2A01G134100	0.72742	0.701924	0.822176	0.179912	0.110726	0.122971	2.09629e-16	-2.56665	down	--	PREDICTED: uncharacterized protein LOC100832736 [Brachypodium distachyon]
TraesCS2A01G134300	1.42005	1.34399	1.5193	0	0	0	7.53728e-23	-7.68603	down	Beta-glucosidase 26 (Precursor) GN=OsJ_25416 OS=Oryza sativa subsp. japonica (Rice) PE=1 SV=1	Beta-glucosidase 26 [Triticum urartu]
TraesCS2A01G134400	1.57607	1.21497	1.55688	0	0	0	8.84809e-27	-8.15576	down	--	hypothetical protein [Oryza sativa Japonica Group]
TraesCS2A01G134900	13.8246	12.1139	12.7099	0.038526	0.035918	0.034781	5.96118e-107	-8.21988	down	Uncharacterized membrane protein At4g09580 GN=At4g09580 OS=Arabidopsis thaliana (Mouse-ear cress) PE=1 SV=1	hypothetical protein F775_29482 [Aegilops tauschii]
TraesCS2A01G135600	8.36985	7.36114	7.36518	0.283898	0.407687	0.213385	2.07781e-109	-4.80667	down	HUA2-like protein 2 GN=At3g63070 OS=Arabidopsis thaliana (Mouse-ear cress) PE=3 SV=1	PREDICTED: HUA2-like protein 3 [Brachypodium distachyon]
TraesCS2A01G135800	8.30798	7.70719	7.78837	0.328266	0.374224	0.532135	3.11676e-131	-4.44	down	BTB/POZ and MATH domain-containing protein 1 GN=BPM1 OS=Arabidopsis thaliana (Mouse-ear cress) PE=1 SV=1	predicted protein [Hordeum vulgare subsp. vulgare]
TraesCS2A01G136100	1.74848	2.13686	2.36661	0	0	0	5.46297e-23	-7.72281	down	Phospholipase A1-Igamma2, chloroplastic (Precursor) GN=At2g30550 OS=Arabidopsis thaliana (Mouse-ear cress) PE=1 SV=2	Lipase [Aegilops tauschii]
TraesCS2A01G136700	1.33877	1.60571	1.87467	0	0	0	1.92181e-22	-7.6575	down	--	PREDICTED: protein SSUH2 homolog isoform X1 [Brachypodium distachyon]
TraesCS2A01G136800	3.73912	3.71725	3.83118	0	0	0	6.73405e-39	-9.35513	down	--	PREDICTED: protein SSUH2 homolog isoform X2 [Brachypodium distachyon]
TraesCS2A01G138000	2.07281	1.68945	1.81481	0	0	0	2.46139e-26	-8.10642	down	DEAD-box ATP-dependent RNA helicase 57 OS=Oryza sativa subsp. japonica (Rice) PE=2 SV=2	PREDICTED: DEAD-box ATP-dependent RNA helicase 57 [Brachypodium distachyon]
TraesCS2A01G138100	4.20415	4.57539	4.8423	0.278356	0.24993	0.034973	4.04286e-83	-6.11469	down	Putative E3 ubiquitin-protein ligase XBAT35 GN=XBAT35 OS=Arabidopsis thaliana (Mouse-ear cress) PE=2 SV=1	Mitochondrial ubiquitin ligase activator of NFKB 1 [Triticum urartu]
TraesCS2A01G138200	1.29116	1.16772	0.938755	0	0	0	6.27902e-18	-7.02992	down	--	hypothetical protein F775_26748 [Aegilops tauschii]
TraesCS2A01G138300	39.3358	47.9363	39.5253	0	0	0	6.5473e-58	-10.8553	down	--	hypothetical protein TRIUR3_07654 [Triticum urartu]
TraesCS2A01G138700	6.35269	5.1575	4.8671	0.496125	0.876498	0.476023	2.22354e-39	-3.17144	down	--	RNA ligase isoform 1 [Triticum aestivum]
TraesCS2A01G138800	1.15302	0.913423	1.06378	0.056478	0.129345	0.060869	5.14571e-19	-3.6907	down	--	hypothetical protein TRIUR3_23627 [Triticum urartu]
TraesCS2A01G139400	1.28199	0.699481	0.912368	0	0	0	3.17445e-16	-6.88427	down	Auxin response factor 3 OS=Oryza sativa subsp. japonica (Rice) PE=2 SV=1	hypothetical protein TRIUR3_10509 [Triticum urartu]
TraesCS2A01G140000	2.79942	3.14641	2.30996	0	0	0	1.04136e-30	-8.59891	down	--	hypothetical protein TRIUR3_10116 [Triticum urartu]
TraesCS2A01G140100	7.72398	5.80422	7.65888	0.015967	0.00823	0	2.1033e-51	-8.64812	down	--	hypothetical protein TRIUR3_25773 [Triticum urartu]
TraesCS2A01G140600	1.24659	0.900701	1.36446	0.003666	0.004185	0.008655	2.57971e-22	-6.24767	down	--	hypothetical protein F775_14622 [Aegilops tauschii]
TraesCS2A01G140900	9.35022	13.22	10.1956	0	0	0	4.27156e-41	-9.59784	down	Basic leucine zipper 2 GN=P0031E09.34 OS=Oryza sativa subsp. japonica (Rice) PE=2 SV=1	unnamed protein product [Triticum aestivum]
TraesCS2A01G141100	1.5509	1.30518	1.27224	0	0	0	1.48754e-23	-7.77441	down	Probable protein phosphatase 2C 65 OS=Oryza sativa subsp. japonica (Rice) PE=2 SV=1	PREDICTED: probable protein phosphatase 2C 65-like isoform X1 [Setaria italica]
TraesCS2A01G141300	1.4649	1.0736	1.35721	0	0	0	2.74978e-34	-8.96024	down	--	hypothetical protein TRIUR3_32386 [Triticum urartu]
TraesCS2A01G141400	1.62058	1.44851	1.34457	0	0.005817	0.019959	1.29535e-37	-6.89343	down	Metal tolerance protein 8 GN=OSJNBa0077M12.119 OS=Oryza sativa subsp. japonica (Rice) PE=2 SV=2	Zinc transporter 7 [Aegilops tauschii]
TraesCS2A01G141500	0.872535	0.984287	0.998789	0	0	0	6.35921e-17	-6.87137	down	--	hypothetical protein F775_17879 [Aegilops tauschii]
TraesCS2A01G141800	9.5254	6.8246	8.05784	0.241878	0.236775	0.829638	2.87222e-12	-4.07682	down	--	PREDICTED: transcription-associated protein 1 isoform X1 [Brachypodium distachyon]
TraesCS2A01G141900	12.5239	10.9524	8.9619	2.1149	1.93433	1.59306	4.25858e-44	-2.70471	down	Uncharacterized GPI-anchored protein At3g06035 (Precursor) GN=At3g06035 OS=Arabidopsis thaliana (Mouse-ear cress) PE=2 SV=1	hypothetical protein F775_44025 [Aegilops tauschii]
TraesCS2A01G142200	2.10032	2.32853	1.67544	0	0	0	1.65633e-26	-8.14414	down	--	hypothetical protein TRIUR3_00579 [Triticum urartu]
TraesCS2A01G142300	4.54487	4.57083	4.36481	0	0	0	3.39058e-38	-9.29201	down	11-oxo-beta-amyrin 30-oxidase GN=CYP72A154 OS=Glycyrrhiza uralensis (Chinese licorice) PE=1 SV=1	predicted protein [Hordeum vulgare subsp. vulgare]
TraesCS2A01G142400	4.99074	4.01841	3.96119	0	0.023879	0	1.49099e-09	-5.89965	down	--	predicted protein [Hordeum vulgare subsp. vulgare]
TraesCS2A01G142500	4.61902	3.77743	3.46531	0.010336	0	0	5.72213e-47	-8.75172	down	--	Nodulation protein H [Triticum urartu]
TraesCS2A01G142700	4.37966	4.19024	4.50992	0	0	0	5.82329e-31	-8.6009	down	Ubiquitin (Precursor) OS=Phytophthora infestans (Potato late blight fungus) PE=1 SV=2	predicted protein [Hordeum vulgare subsp. vulgare]
TraesCS2A01G142800	13.7444	11.7965	12.5199	0	0	0	2.62004e-56	-10.7219	down	TGACG-sequence-specific DNA-binding protein TGA-1B (Fragment) GN=TGA1B OS=Nicotiana tabacum (Common tobacco) PE=2 SV=1	predicted protein [Hordeum vulgare subsp. vulgare]
TraesCS2A01G142900	13.6331	14.8204	13.2562	0	0	0	3.11609e-49	-10.208	down	--	PREDICTED: ATP synthase mitochondrial F1 complex assembly factor 2 [Brachypodium distachyon]
TraesCS2A01G143200	2.1154	2.20766	1.41986	0	0	0	1.73739e-21	-7.5449	down	Probable carboxylesterase 18 GN=CXE18 OS=Arabidopsis thaliana (Mouse-ear cress) PE=1 SV=1	predicted protein [Hordeum vulgare subsp. vulgare]
TraesCS2A01G143400	1.56614	1.31371	0.799307	0	0	0	1.32647e-17	-7.02598	down	Zinc transporter 8 (Precursor) OS=Oryza sativa subsp. japonica (Rice) PE=2 SV=1	Zinc transporter 1 [Aegilops tauschii]
TraesCS2A01G143500	0.868893	0.837016	0.993319	0	0.006378	0	4.40473e-16	-6.19936	down	Probable carboxylesterase 18 GN=CXE18 OS=Arabidopsis thaliana (Mouse-ear cress) PE=1 SV=1	predicted protein [Hordeum vulgare subsp. vulgare]
TraesCS2A01G143700	2.99583	3.25284	3.15566	0	0.010098	0	1.23414e-48	-8.37926	down	Zinc finger CCCH domain-containing protein 42 GN=At3g47120 OS=Arabidopsis thaliana (Mouse-ear cress) PE=2 SV=1	Zinc finger CCCH domain-containing protein 42 [Aegilops tauschii]
TraesCS2A01G144100	1.46285	1.40223	1.20271	0	0	0	2.54036e-25	-7.99264	down	B3 domain-containing protein Os01g0234100 OS=Oryza sativa subsp. japonica (Rice) PE=2 SV=1	B3 domain-containing protein [Aegilops tauschii]
TraesCS2A01G144200	42.8824	47.6064	46.0413	0.029878	0.107344	0.098266	3.7406e-175	-8.52293	down	Gamma carbonic anhydrase 2, mitochondrial (Precursor) GN=F8G22.2 OS=Arabidopsis thaliana (Mouse-ear cress) PE=1 SV=1	PREDICTED: gamma carbonic anhydrase 2, mitochondrial [Brachypodium distachyon]
TraesCS2A01G144400	2.02283	1.99504	1.95676	0.048497	0.020167	0	8.0573e-53	-6.08234	down	C2 domain-containing protein At1g53590 OS=Arabidopsis thaliana (Mouse-ear cress) PE=1 SV=2	hypothetical protein F775_16041 [Aegilops tauschii]
TraesCS2A01G144800	3.7339	3.68421	3.57478	0	0	0	1.37097e-41	-9.58693	down	Probable mediator of RNA polymerase II transcription subunit 26b GN=K2A11.1 OS=Arabidopsis thaliana (Mouse-ear cress) PE=2 SV=1	hypothetical protein F775_06522 [Aegilops tauschii]
TraesCS2A01G145200	1.97276	1.78615	1.25194	0	0	0	5.32473e-29	-8.44036	down	Putative SWI/SNF-related matrix-associated actin-dependent regulator of chromatin subfamily A member 3-like 1 GN=At5g05130 OS=Arabidopsis thaliana (Mouse-ear cress) PE=2 SV=1	Putative SWI/SNF-related matrix-associated actin-dependent regulator of chromatin subfamily A member 3-like protein 1 [Aegilops tauschii]
TraesCS2A01G145500	21.8436	21.2667	22.801	0.603364	0.681378	1.0381	2.05196e-126	-4.9467	down	--	predicted protein [Hordeum vulgare subsp. vulgare]
TraesCS2A01G145700	11.7357	12.6535	7.86465	0	0	0	1.37952e-26	-8.1787	down	--	predicted protein [Hordeum vulgare subsp. vulgare]
TraesCS2A01G145900	3.50423	3.24512	2.91662	0	0	0	3.6155e-25	-7.96867	down	Probable plastid-lipid-associated protein 6, chloroplastic (Precursor) GN=At3g23400 OS=Arabidopsis thaliana (Mouse-ear cress) PE=1 SV=1	harpin binding protein 1 [Triticum aestivum]
TraesCS2A01G146000	73.1415	64.6855	59.9566	0	0	0	7.40611e-53	-10.4828	down	10 kDa chaperonin GN=CPN10 OS=Arabidopsis thaliana (Mouse-ear cress) PE=3 SV=1	10 kDa chaperonin [Aegilops tauschii]
TraesCS2A01G146100	0.841502	1.44114	0.753423	0.075265	0.014041	0	5.77854e-19	-4.82505	down	--	predicted protein [Hordeum vulgare subsp. vulgare]
TraesCS2A01G146200	27.1529	23.0831	21.6064	0.718625	0.619951	0.416438	2.60746e-169	-5.4932	down	Calcium/calmodulin-dependent serine/threonine-protein kinase 1 GN=CAMK1 OS=Oryza sativa subsp. japonica (Rice) PE=1 SV=1	predicted protein [Hordeum vulgare subsp. vulgare]
TraesCS2A01G146500	1.5255	1.47395	1.40877	0	0	0	1.30211e-22	-7.65237	down	--	hypothetical protein TRIUR3_10875 [Triticum urartu]
TraesCS2A01G146700	1.60042	1.83981	2.30913	0	0	0	3.76616e-23	-7.75572	down	--	hypothetical protein TRIUR3_10873 [Triticum urartu]
TraesCS2A01G146800	23.9419	24.4055	19.2078	0.021153	0	0	4.58353e-92	-10.4342	down	--	Xylulose kinase [Triticum urartu]
TraesCS2A01G146900	29.719	35.9553	30.6004	0	0	0	2.85782e-46	-9.99285	down	NADH dehydrogenase [ubiquinone] 1 alpha subcomplex subunit 6 GN=At3g12260 OS=Arabidopsis thaliana (Mouse-ear cress) PE=2 SV=1	hypothetical protein TRIUR3_21550 [Triticum urartu]
TraesCS2A01G147000	2.86194	2.50423	2.36615	0	0	0	3.28193e-35	-9.02959	down	--	hypothetical protein TRIUR3_33195 [Triticum urartu]
TraesCS2A01G147100	2.64892	2.2435	1.67269	0	0	0	1.63981e-28	-8.38533	down	Probable protein arginine N-methyltransferase 3 OS=Oryza sativa subsp. japonica (Rice) PE=2 SV=1	putative protein arginine N-methyltransferase 3 [Triticum urartu]
TraesCS2A01G147200	4.5197	4.06174	4.25519	0.569791	0.446734	0.545063	4.20723e-44	-3.10193	down	--	PREDICTED: thymidylate kinase [Brachypodium distachyon]
TraesCS2A01G147400	37.7212	41.086	40.2012	5.83101	6.00778	6.95909	4.34232e-169	-3.04221	down	Eukaryotic translation initiation factor 6-2 {ECO:0000255|HAMAP-Rule:MF_03132} GN=At3g55620 OS=Arabidopsis thaliana (Mouse-ear cress) PE=2 SV=1	PREDICTED: eukaryotic translation initiation factor 6-2 [Brachypodium distachyon]
TraesCS2A01G147500	17.5234	18.2173	14.2405	0	0	0	5.69595e-52	-10.4328	down	--	predicted protein [Hordeum vulgare subsp. vulgare]
TraesCS2A01G149200	5.91427	5.06144	4.60325	0	0.004164	0.010668	1.96182e-73	-9.07675	down	--	Leucyl-tRNA synthetase, cytoplasmic [Aegilops tauschii]
TraesCS2A01G149300	6.49053	5.92942	5.93863	0	0	0	4.43118e-34	-8.91096	down	Phosphoserine phosphatase, chloroplastic (Precursor) GN=F26I16.2 OS=Arabidopsis thaliana (Mouse-ear cress) PE=1 SV=2	Phosphoserine phosphatase, chloroplastic [Triticum urartu]
TraesCS2A01G149500	0.597972	0.536679	0.621284	0.045414	0	0.018736	0.000206705	-3.6723	down	Phragmoplast orienting kinesin 2 GN=POK2 OS=Arabidopsis thaliana (Mouse-ear cress) PE=2 SV=1	Kinesin-like protein KIF15 [Triticum urartu]
TraesCS2A01G149600	1.95119	1.89431	2.12019	0	0	0	1.00114e-28	-8.36884	down	--	Serine/threonine-protein kinase haspin [Aegilops tauschii]
TraesCS2A01G149700	12.9856	12.374	13.4348	0	0	0	2.12972e-48	-10.1394	down	Novel plant SNARE 13 GN=NPSN13 OS=Arabidopsis thaliana (Mouse-ear cress) PE=1 SV=1	NPSN13 [Triticum aestivum]
TraesCS2A01G150000	22.0045	23.2065	19.0961	0	0	0	2.7939e-56	-10.732	down	[Pyruvate dehydrogenase (acetyl-transferring)] kinase, mitochondrial OS=Arabidopsis thaliana (Mouse-ear cress) PE=1 SV=1	Pyruvate dehydrogenase kinase, mitochondrial [Aegilops tauschii]
TraesCS2A01G150200	1.20402	0.920857	1.17102	0	0	0	2.21804e-27	-8.23769	down	--	hypothetical protein TRIUR3_12710 [Triticum urartu]
TraesCS2A01G150300	2.18875	1.99013	2.11757	0	0	0.034196	0.000119683	-4.21612	down	--	hypothetical protein TRIUR3_10440 [Triticum urartu]
TraesCS2A01G150500	0.582179	0.5138	0.533483	0.012647	0.007569	0.007036	3.42079e-18	-4.9823	down	Pentatricopeptide repeat-containing protein ELI1, chloroplastic {ECO:0000305} (Precursor) GN=At4g37380 OS=Arabidopsis thaliana (Mouse-ear cress) PE=3 SV=1	hypothetical protein TRIUR3_10442 [Triticum urartu]
TraesCS2A01G150600	2.01839	1.42837	1.95671	0	0	0	2.71947e-27	-8.2343	down	CBL-interacting protein kinase 21 GN=OJ1136_D11.123 OS=Oryza sativa subsp. japonica (Rice) PE=2 SV=2	predicted protein [Hordeum vulgare subsp. vulgare]
TraesCS2A01G151300	1.14874	1.36162	1.12166	0	0	0	2.01756e-21	-7.51058	down	--	hypothetical protein F775_09947 [Aegilops tauschii]
TraesCS2A01G151600	1.46919	1.13721	1.28009	0	0	0	6.47344e-26	-8.06311	down	CHD3-type chromatin-remodeling factor PICKLE GN=At2g25170 OS=Arabidopsis thaliana (Mouse-ear cress) PE=1 SV=1	Zinc finger Ran-binding domain-containing protein 3 [Aegilops tauschii]
TraesCS2A01G151700	2.34834	2.70289	2.60957	0.00565	0	0	7.10489e-28	-7.65047	down	Mediator-associated protein 1 GN=At4g25210 OS=Arabidopsis thaliana (Mouse-ear cress) PE=1 SV=1	hypothetical protein SORBIDRAFT_02g040550 [Sorghum bicolor]
TraesCS2A01G151800	7.43373	6.79723	5.87908	0.020838	0.04988	0.04047	3.64346e-93	-7.4134	down	H/ACA ribonucleoprotein complex subunit 4 GN=F24I3.230 OS=Arabidopsis thaliana (Mouse-ear cress) PE=1 SV=1	predicted protein [Hordeum vulgare subsp. vulgare]
TraesCS2A01G151900	8.18848	7.19102	5.8279	0.552426	0.544645	0.616097	1.75569e-89	-3.79709	down	H/ACA ribonucleoprotein complex subunit 4 GN=F24I3.230 OS=Arabidopsis thaliana (Mouse-ear cress) PE=1 SV=1	predicted protein [Hordeum vulgare subsp. vulgare]
TraesCS2A01G152000	33.0185	27.858	25.0435	0	0.072639	0.097371	1.74988e-64	-9.00329	down	Hydrophobic protein LTI6A GN=OJ1136_D11.102 OS=Oryza sativa subsp. japonica (Rice) PE=2 SV=1	plasma membrance protein3 [Puccinellia tenuiflora]
TraesCS2A01G153000	24.2849	20.4202	17.6568	0	0	0	8.27379e-57	-10.7878	down	--	hypothetical protein F775_18206 [Aegilops tauschii]
TraesCS2A01G153300	9.61529	12.4179	12.2015	0	0	0	6.19879e-41	-9.5678	down	--	Uncharacterized protein C24B11.05 [Triticum urartu]
TraesCS2A01G153400	23.7319	26.2271	22.0243	0.015686	0	0.015488	9.60223e-70	-9.71102	down	--	predicted protein [Hordeum vulgare subsp. vulgare]
TraesCS2A01G153500	2.49234	2.46517	2.8638	0	0	0	2.04851e-22	-7.6328	down	Ras-related protein RABA5a GN=RABA5A OS=Arabidopsis thaliana (Mouse-ear cress) PE=2 SV=1	predicted protein [Hordeum vulgare subsp. vulgare]
TraesCS2A01G153600	3.64976	4.61175	4.62385	0	0	0	9.5331e-36	-9.11765	down	Putative F-box/LRR-repeat protein 23 GN=FBL23 OS=Arabidopsis thaliana (Mouse-ear cress) PE=3 SV=1	Putative F-box/LRR-repeat protein 23 [Triticum urartu]
TraesCS2A01G153700	2.36774	2.2911	1.87042	0.033808	0.018709	0.023356	1.93612e-40	-5.82146	down	Adenine nucleotide transporter BT1, chloroplastic/mitochondrial (Precursor) GN=F8B4.100 OS=Arabidopsis thaliana (Mouse-ear cress) PE=1 SV=1	Solute carrier family 25 member 44 [Aegilops tauschii]
TraesCS2A01G153900	1.93725	2.16528	2.192	0	0	0	7.23043e-22	-7.56312	down	--	hypothetical protein F775_13695 [Aegilops tauschii]
TraesCS2A01G154100	32.028	35.9635	31.178	0	0	0	5.48227e-42	-9.63226	down	--	hypothetical protein TRIUR3_09455 [Triticum urartu]
TraesCS2A01G154300	1.69692	1.42787	2.38771	0	0	0	3.94666e-24	-7.89738	down	Probable serine/threonine-protein kinase At1g01540 GN=At1g01540 OS=Arabidopsis thaliana (Mouse-ear cress) PE=1 SV=2	PREDICTED: probable serine/threonine-protein kinase At1g01540 [Brachypodium distachyon]
TraesCS2A01G154400	3.97345	3.0437	2.97133	0	0	0	7.71349e-43	-9.72401	down	DEAD-box ATP-dependent RNA helicase ISE2, chloroplastic (Precursor) GN=F20P5.20 OS=Arabidopsis thaliana (Mouse-ear cress) PE=1 SV=2	Superkiller viralicidic activity 2-like 2 [Triticum urartu]
TraesCS2A01G154500	8.14475	7.14991	6.82804	0	0	0	6.09947e-31	-8.60298	down	--	PREDICTED: uncharacterized protein LOC100829266 [Brachypodium distachyon]
TraesCS2A01G154600	5.196	4.73685	5.52029	0.005464	0.032625	0.009875	1.47618e-71	-7.99959	down	--	predicted protein [Hordeum vulgare subsp. vulgare]
TraesCS2A01G154800	2.63531	1.93558	2.37273	0	0	0	9.77347e-28	-8.27698	down	DEAD-box ATP-dependent RNA helicase 36 OS=Oryza sativa subsp. japonica (Rice) PE=3 SV=1	PREDICTED: DEAD-box ATP-dependent RNA helicase 36 [Brachypodium distachyon]
TraesCS2A01G154900	0.684867	0.521656	1.2894	0	0.013529	0	1.14527e-18	-6.14904	down	--	hypothetical protein F775_26303 [Aegilops tauschii]
TraesCS2A01G155100	9.93062	7.78293	7.49357	0	0	0	2.01276e-41	-9.60718	down	Serine/arginine-rich SC35-like splicing factor SCL33 GN=F7A10.15 OS=Arabidopsis thaliana (Mouse-ear cress) PE=1 SV=1	Serine/arginine-rich splicing factor 12 [Triticum urartu]
TraesCS2A01G155200	7.18759	9.2474	7.59103	0	0	0	4.27106e-35	-9.0362	down	Glucan endo-1,3-beta-glucosidase 4 (Precursor) GN=At3g13560 OS=Arabidopsis thaliana (Mouse-ear cress) PE=1 SV=1	hypothetical protein F775_42833 [Aegilops tauschii]
TraesCS2A01G155300	4.71709	4.22752	6.08464	0	0	0	2.08867e-29	-8.47579	down	--	predicted protein [Hordeum vulgare subsp. vulgare]
TraesCS2A01G155500	12.8721	11.7706	13.4677	0	0	0.021726	2.50875e-70	-9.73043	down	Serine/threonine-protein kinase HT1 GN=HT1 OS=Arabidopsis thaliana (Mouse-ear cress) PE=1 SV=1	predicted protein [Hordeum vulgare subsp. vulgare]
TraesCS2A01G155600	29.7944	33.3181	28.3412	0	0	0	1.1596e-53	-10.5427	down	Transmembrane emp24 domain-containing protein p24delta9 (Precursor) GN=At1g26690 OS=Arabidopsis thaliana (Mouse-ear cress) PE=2 SV=1	PREDICTED: transmembrane emp24 domain-containing protein p24delta9-like [Setaria italica]
TraesCS2A01G155700	6.18394	5.23874	5.4492	0.060175	0.072362	0.035658	1.9116e-129	-6.66699	down	--	predicted protein [Hordeum vulgare subsp. vulgare]
TraesCS2A01G155900	1.26111	1.50894	1.39698	0	0	0	3.20938e-26	-8.09683	down	--	hypothetical protein TRIUR3_11325 [Triticum urartu]
TraesCS2A01G156100	18.5994	11.4529	26.1118	0	0	0	1.9831e-44	-10.0002	down	RNA-binding protein CP29B, chloroplastic {ECO:0000305} (Precursor) GN=F3G5.1 OS=Arabidopsis thaliana (Mouse-ear cress) PE=1 SV=1	predicted protein [Hordeum vulgare subsp. vulgare]
TraesCS2A01G156200	6.26278	5.4965	6.49913	0	0.034592	0	2.43761e-37	-8.00572	down	Exosome complex exonuclease RRP46 homolog GN=RRP46 OS=Oryza sativa subsp. japonica (Rice) PE=1 SV=2	predicted protein [Hordeum vulgare subsp. vulgare]
TraesCS2A01G156400	28.4425	31.7139	42.7419	0	0	0	3.87142e-52	-10.4954	down	Probable calcium-binding protein CML45 GN=CML45 OS=Arabidopsis thaliana (Mouse-ear cress) PE=1 SV=1	Putative calcium-binding protein CML45 [Aegilops tauschii]
TraesCS2A01G156800	122.018	95.9923	87.378	0	0	0	3.21973e-71	-11.7235	down	E3 ubiquitin-protein ligase RING1 GN=RING1 OS=Gossypium hirsutum (Upland cotton) PE=1 SV=1	predicted protein [Hordeum vulgare subsp. vulgare]
TraesCS2A01G156900	20.5585	10.5178	21.851	0.043557	0	0	2.18189e-44	-8.87733	down	Protein RALF-like 33 (Precursor) OS=Arabidopsis thaliana (Mouse-ear cress) PE=2 SV=1	hypothetical protein TRIUR3_16964 [Triticum urartu]
TraesCS2A01G157000	7.25448	7.12546	6.80331	1.76154	0.987963	1.57442	5.0473e-29	-2.46746	down	--	hypothetical protein F775_27649 [Aegilops tauschii]
TraesCS2A01G157100	1.27755	1.21766	1.15788	0	0	0.014653	6.03365e-26	-6.5569	down	Probable mannan synthase 7 GN=P0011H09.139 OS=Oryza sativa subsp. japonica (Rice) PE=2 SV=1	hypothetical protein TRIUR3_23716 [Triticum urartu]
TraesCS2A01G157400	9.09801	7.75108	5.01693	0.0424	0	0.026786	2.18945e-46	-7.54576	down	Ribonuclease 1 (Precursor) GN=RNS1 OS=Arabidopsis thaliana (Mouse-ear cress) PE=1 SV=1	Ribonuclease 1 [Triticum urartu]
TraesCS2A01G157500	4.34044	5.32337	4.46903	0	0	0	9.73977e-35	-8.99238	down	--	Laccase-23 [Aegilops tauschii]
TraesCS2A01G157600	1.46359	1.18108	1.9568	0	0	0	4.34983e-23	-7.76213	down	Myb-related protein 306 OS=Antirrhinum majus (Garden snapdragon) PE=2 SV=1	R2R3-MYB protein [Triticum aestivum]
TraesCS2A01G157700	1.53038	2.00851	1.02764	0	0	0	2.22944e-17	-6.99288	down	Origin of replication complex subunit 6 {ECO:0000305} OS=Oryza sativa subsp. indica (Rice) PE=3 SV=1	predicted protein [Hordeum vulgare subsp. vulgare]
TraesCS2A01G157800	9.34833	11.89	10.4049	0	0	0	8.10361e-43	-9.713	down	Transcription factor bHLH47 GN=F1P2.190 OS=Arabidopsis thaliana (Mouse-ear cress) PE=2 SV=1	Transcription factor bHLH47 [Triticum urartu]
TraesCS2A01G158000	0.735341	0.825692	0.945403	0	0	0	7.96909e-18	-7.00389	down	--	hypothetical protein TRIUR3_34017 [Triticum urartu]
TraesCS2A01G158300	14.134	12.9618	12.6077	2.22969	2.74256	2.60188	7.18967e-83	-2.5851	down	Developmentally-regulated G-protein 3 GN=F23K16.150 OS=Arabidopsis thaliana (Mouse-ear cress) PE=1 SV=1	Developmentally-regulated GTP-binding protein 1 [Aegilops tauschii]
TraesCS2A01G158900	1.47907	1.41262	1.4818	0	0	0	2.59664e-30	-8.53355	down	Transcription factor MYB98 GN=MYB98 OS=Arabidopsis thaliana (Mouse-ear cress) PE=2 SV=1	Myb-related protein B [Aegilops tauschii]
TraesCS2A01G159200	0.927355	1.66675	1.46473	0	0	0	1.34059e-18	-7.17407	down	--	hypothetical protein TRIUR3_32431 [Triticum urartu]
TraesCS2A01G159300	11.4547	11.1752	12.4104	0.485348	0.418312	0.657173	3.10455e-136	-4.49719	down	4-alpha-glucanotransferase DPE1, chloroplastic/amyloplastic (Precursor) OS=Oryza sativa subsp. japonica (Rice) PE=2 SV=2	disproportionating enzyme [Triticum aestivum]
TraesCS2A01G159600	13.876	17.3449	15.1949	0	0	0	1.79792e-54	-10.6149	down	Patatin-like protein 2 OS=Oryza sativa subsp. japonica (Rice) PE=3 SV=1	Patatin group A-3 [Triticum urartu]
TraesCS2A01G159700	13.0625	13.9183	12.8883	0	0.065742	0	1.94001e-07	-5.35418	down	Putative MYST-like histone acetyltransferase 1 GN=OJ1339_F05.128 OS=Oryza sativa subsp. japonica (Rice) PE=3 SV=1	Putative MYST-like histone acetyltransferase 1 [Aegilops tauschii]
TraesCS2A01G159900	2.51126	2.37474	2.21641	0	0	0	5.73696e-38	-9.27438	down	Probable inactive receptor kinase At5g10020 (Precursor) GN=At5g10020 OS=Arabidopsis thaliana (Mouse-ear cress) PE=1 SV=2	predicted protein [Hordeum vulgare subsp. vulgare]
TraesCS2A01G160100	1.41947	0.98274	1.19439	0	0	0	8.02093e-19	-7.16417	down	Chaperone protein dnaJ 11, chloroplastic (Precursor) GN=T19K4.170 OS=Arabidopsis thaliana (Mouse-ear cress) PE=1 SV=2	Chaperone protein dnaJ [Aegilops tauschii]
TraesCS2A01G160200	2.52102	2.74213	2.78185	0.034496	0	0	3.44126e-07	-5.09442	down	--	predicted protein [Hordeum vulgare subsp. vulgare]
TraesCS2A01G160300	1.3301	1.2244	0.935781	0	0	0	4.27456e-25	-7.97271	down	--	hypothetical protein F775_18803 [Aegilops tauschii]
TraesCS2A01G160400	4.44001	1.53581	3.92261	0	0	0	2.86385e-22	-7.79235	down	--	50S ribosomal protein L7/L12 [Aegilops tauschii]
TraesCS2A01G160500	8.6944	8.56207	7.72484	0.61664	0.119109	0.171695	1.19135e-24	-4.64227	down	Mitochondrial import inner membrane translocase subunit TIM44-2 (Precursor) GN=TIM44-2 OS=Arabidopsis thaliana (Mouse-ear cress) PE=1 SV=1	predicted protein [Hordeum vulgare subsp. vulgare]
TraesCS2A01G160700	6.41803	5.34662	3.62155	0.019573	0	0	1.32092e-29	-7.45228	down	Heavy metal-associated isoprenylated plant protein 26 (Precursor) GN=F20M13.140 OS=Arabidopsis thaliana (Mouse-ear cress) PE=1 SV=1	hypothetical protein TRIUR3_04753 [Triticum urartu]
TraesCS2A01G161000	12.2205	11.5176	11.4134	0	0	0	1.71774e-45	-9.90822	down	Probable trehalose-phosphate phosphatase 3 GN=P0524E08.130 OS=Oryza sativa subsp. japonica (Rice) PE=2 SV=1	Trehalose-phosphate phosphatase [Aegilops tauschii]
TraesCS2A01G161100	4.14515	4.02787	4.09228	0	0	0	9.26272e-31	-8.57843	down	Probable trehalose-phosphate phosphatase 3 GN=P0524E08.130 OS=Oryza sativa subsp. japonica (Rice) PE=2 SV=1	predicted protein [Hordeum vulgare subsp. vulgare]
TraesCS2A01G161200	1.43637	1.49125	1.34947	0.017786	0	0	2.15008e-24	-6.39899	down	Probable trehalose-phosphate phosphatase 3 GN=P0524E08.130 OS=Oryza sativa subsp. japonica (Rice) PE=2 SV=1	Trehalose-phosphate phosphatase [Aegilops tauschii]
TraesCS2A01G161300	11.086	11.1845	10.6143	0.060065	1.02645	0.189163	2.35785e-06	-4.05411	down	Probable UMP/CMP kinase 3 GN=P0524E08.133 OS=Oryza sativa subsp. japonica (Rice) PE=2 SV=1	predicted protein [Hordeum vulgare subsp. vulgare]
TraesCS2A01G161400	3.31812	2.7938	2.81422	0	0	0	8.56221e-36	-9.07785	down	U4/U6 small nuclear ribonucleoprotein PRP4-like protein GN=EMB2776 OS=Arabidopsis thaliana (Mouse-ear cress) PE=2 SV=1	Uncharacterized WD repeat-containing protein C2A9.03 [Triticum urartu]
TraesCS2A01G161600	7.56293	9.16565	7.53351	0.020079	0.014537	0.033089	1.6689e-59	-7.13718	down	Non-specific lipid transfer protein-like 1 (Precursor) GN=B1246D11.7 OS=Oryza sativa subsp. japonica (Rice) PE=1 SV=1	predicted protein [Hordeum vulgare subsp. vulgare]
TraesCS2A01G161700	2.01401	2.30429	2.14182	0	0.024754	0.010661	7.64443e-30	-6.57879	down	Leucine-rich repeat extensin-like protein 6 (Precursor) GN=LRX6 OS=Arabidopsis thaliana (Mouse-ear cress) PE=2 SV=1	predicted protein [Hordeum vulgare subsp. vulgare]
TraesCS2A01G161900	2.86092	2.39507	2.87574	0	0	0	2.44228e-36	-9.13556	down	--	hypothetical protein TRIUR3_32995 [Triticum urartu]
TraesCS2A01G162100	54.435	49.0728	48.0622	0.730722	0.948003	0.933885	0	-5.94609	down	--	predicted protein [Hordeum vulgare subsp. vulgare]
TraesCS2A01G162600	25.2745	22.6894	21.8951	0	0	0.116394	2.58869e-61	-8.76435	down	Transcription elongation factor SPT4 homolog 2 GN=At5g63670 OS=Arabidopsis thaliana (Mouse-ear cress) PE=2 SV=1	Transcription elongation factor SPT4-like protein 2 [Triticum urartu]
TraesCS2A01G162700	19.6532	16.7467	19.4205	0.030454	0.023515	0	5.79205e-90	-8.48375	down	Serine/arginine-rich splicing factor SC35 GN=SC35 OS=Arabidopsis thaliana (Mouse-ear cress) PE=1 SV=1	PREDICTED: probable splicing factor, arginine/serine-rich 4-like isoform X1 [Oryza brachyantha]
TraesCS2A01G162900	3.5018	3.91394	3.60813	0	0	0	7.81966e-25	-7.92996	down	Copper-transporting ATPase PAA1, chloroplastic (Precursor) OS=Arabidopsis thaliana (Mouse-ear cress) PE=2 SV=1	predicted protein [Hordeum vulgare subsp. vulgare]
TraesCS2A01G163000	9.49356	7.94517	8.57196	0.363876	0	0.714458	0.00831562	-3.08331	down	Calmodulin-binding transcription activator 1 GN=T5E8.210 OS=Arabidopsis thaliana (Mouse-ear cress) PE=2 SV=2	Calmodulin-binding transcription activator 2 [Aegilops tauschii]
TraesCS2A01G163100	10.1259	8.8827	9.28693	0	0	0	6.80922e-29	-8.38494	down	Multifunctional methyltransferase subunit TRM112-like protein At1g78190 GN=At1g78190 OS=Arabidopsis thaliana (Mouse-ear cress) PE=2 SV=1	predicted protein [Hordeum vulgare subsp. vulgare]
TraesCS2A01G163300	30.7135	39.5337	22.0237	0	0	0	4.97962e-67	-11.5696	down	--	predicted protein [Hordeum vulgare subsp. vulgare]
TraesCS2A01G163400	0.83335	0.634206	0.568989	0	0.013371	0.006214	3.01228e-21	-5.60437	down	Pentatricopeptide repeat-containing protein At5g64320, mitochondrial (Precursor) GN=At5g64320 OS=Arabidopsis thaliana (Mouse-ear cress) PE=2 SV=1	hypothetical protein F775_16328 [Aegilops tauschii]
TraesCS2A01G163600	24.7507	25.0572	25.3962	0.248599	0.210968	0.077742	7.11305e-193	-7.21388	down	Phospho-2-dehydro-3-deoxyheptonate aldolase 2, chloroplastic (Precursor) GN=P0594D10.136 OS=Oryza sativa subsp. japonica (Rice) PE=2 SV=1	predicted protein [Hordeum vulgare subsp. vulgare]
TraesCS2A01G163700	63.0857	60.8744	52.8786	0.028962	0.355813	0.673797	4.20415e-15	-6.23958	down	40S ribosomal protein S6 GN=rps6 OS=Asparagus officinalis (Garden asparagus) PE=2 SV=1	predicted protein [Hordeum vulgare subsp. vulgare]
TraesCS2A01G163800	7.02141	7.87819	6.02629	0	0.020505	0	1.9155e-49	-8.48562	down	Serine/threonine-protein kinase SAPK2 GN=SAPK2 OS=Oryza sativa subsp. indica (Rice) PE=2 SV=2	SNF1-type serine-threonine protein kinase [Triticum polonicum]
TraesCS2A01G164000	45.8412	36.6002	31.7986	0	0	0	4.06611e-64	-11.2464	down	Cytochrome c oxidase subunit 6b-1 GN=COX6B-1 OS=Arabidopsis thaliana (Mouse-ear cress) PE=1 SV=1	putative cytochrome c oxidase subunit [Triticum aestivum]
TraesCS2A01G164100	1.64764	1.38886	1.39022	0.03875	0.080184	0.051261	2.09546e-85	-4.75922	down	Putative uncharacterized protein At4g01020, chloroplastic (Precursor) GN=At4g01020 OS=Arabidopsis thaliana (Mouse-ear cress) PE=3 SV=1	hypothetical protein OsI_26907 [Oryza sativa Indica Group]
TraesCS2A01G164600	19.3137	16.7053	18.281	0	0.048364	0	2.16989e-59	-9.08063	down	GLABRA2 expression modulator GN=GEM OS=Arabidopsis thaliana (Mouse-ear cress) PE=1 SV=1	predicted protein [Hordeum vulgare subsp. vulgare]
TraesCS2A01G164700	0.510419	0.520194	0.365765	0	0	0	5.65979e-17	-6.89377	down	Pentatricopeptide repeat-containing protein At4g28010 GN=At4g28010 OS=Arabidopsis thaliana (Mouse-ear cress) PE=2 SV=1	hypothetical protein TRIUR3_15675 [Triticum urartu]
TraesCS2A01G164800	1.22896	1.445	1.75017	0	0	0	2.58015e-20	-7.36847	down	Cyclin-D2-2 OS=Oryza sativa subsp. japonica (Rice) PE=2 SV=1	predicted protein [Hordeum vulgare subsp. vulgare]
TraesCS2A01G165000	14.9226	21.4357	16.3069	0	0	0.217053	1.32029e-23	-6.7686	down	Dolichyl-diphosphooligosaccharide--protein glycosyltransferase subunit 4A GN=OST4A OS=Oryza sativa subsp. japonica (Rice) PE=3 SV=1	predicted protein [Hordeum vulgare subsp. vulgare]
TraesCS2A01G165100	2.89568	2.49557	2.8491	0.022582	0.025366	0.040429	3.99073e-47	-6.18529	down	--	predicted protein [Hordeum vulgare subsp. vulgare]
TraesCS2A01G165600	15.659	15.3552	8.51221	0	0	0	2.88512e-46	-10.0956	down	Fasciclin-like arabinogalactan protein 2 (Precursor) GN=FLA2 OS=Arabidopsis thaliana (Mouse-ear cress) PE=1 SV=1	fasciclin-like protein FLA6 [Triticum aestivum]
TraesCS2A01G165800	2.40397	2.26167	1.91922	0	0	0	2.89167e-29	-8.43423	down	CDPK-related kinase 5 GN=T20E23.130 OS=Arabidopsis thaliana (Mouse-ear cress) PE=2 SV=1	predicted protein [Hordeum vulgare subsp. vulgare]
TraesCS2A01G165900	2.45387	2.29206	2.85143	0	0	0	2.40485e-30	-8.5554	down	Zinc finger CCCH domain-containing protein 62 OS=Oryza sativa subsp. japonica (Rice) PE=3 SV=2	predicted protein [Hordeum vulgare subsp. vulgare]
TraesCS2A01G166000	12.9884	11.1023	16.7598	0	0	0	1.18113e-46	-10.0663	down	--	predicted protein [Hordeum vulgare subsp. vulgare]
TraesCS2A01G166400	3.66661	4.20499	3.64615	0	0	0	2.60702e-40	-9.49069	down	Protein WEAK CHLOROPLAST MOVEMENT UNDER BLUE LIGHT 1 GN=WEB1 OS=Arabidopsis thaliana (Mouse-ear cress) PE=1 SV=1	hypothetical protein TRIUR3_35071 [Triticum urartu]
TraesCS2A01G166500	18.8316	21.1573	20.4879	0	0	0	4.84018e-42	-9.63534	down	Probable calcium-binding protein CML13 OS=Oryza sativa subsp. japonica (Rice) PE=2 SV=1	predicted protein [Hordeum vulgare subsp. vulgare]
TraesCS2A01G166700	10.7697	9.51404	9.7484	0	0	0	3.78843e-40	-9.46723	down	--	Vacuolar protein sorting-associated protein 27 [Aegilops tauschii]
TraesCS2A01G166800	1.38569	1.36761	1.94414	0	0	0	1.26298e-25	-8.04985	down	--	Folic acid synthesis protein fol1 [Triticum urartu]
TraesCS2A01G166900	1.35816	1.34343	1.54062	0	0	0	7.40683e-27	-8.16553	down	Protein STRUBBELIG-RECEPTOR FAMILY 7 (Precursor) GN=SRF7 OS=Arabidopsis thaliana (Mouse-ear cress) PE=1 SV=1	Protein STRUBBELIG-RECEPTOR FAMILY 7 [Aegilops tauschii]
TraesCS2A01G167000	2.30745	1.85589	2.55102	0.081052	0	0	3.03482e-31	-6.55433	down	--	Os02g0637900 [Oryza sativa Japonica Group]
TraesCS2A01G167400	3.37423	2.85743	4.57962	0	0	0	8.09794e-30	-8.53902	down	F-box only protein 13 GN=FBX13 OS=Arabidopsis thaliana (Mouse-ear cress) PE=2 SV=2	predicted protein [Hordeum vulgare subsp. vulgare]
TraesCS2A01G167500	12.1203	10.209	10.3002	0.040061	0.092319	0.052647	5.96316e-131	-7.41943	down	Alanine aminotransferase 2, mitochondrial (Precursor) OS=Arabidopsis thaliana (Mouse-ear cress) PE=2 SV=1	Alanine aminotransferase 2 [Triticum urartu]
TraesCS2A01G168100	5.42526	5.6661	5.29071	0.063096	0	0	7.90847e-08	-5.33264	down	1-phosphatidylinositol-3-phosphate 5-kinase FAB1B GN=FAB1B OS=Arabidopsis thaliana (Mouse-ear cress) PE=2 SV=1	predicted protein [Hordeum vulgare subsp. vulgare]
TraesCS2A01G168200	178.336	190.987	151.083	0.085787	0.040107	0.034073	0	-11.601	down	Sucrose synthase 2 GN=SS2 OS=Hordeum vulgare (Barley) PE=1 SV=1	Sucrose synthase 2 [Triticum urartu]
TraesCS2A01G168300	66.2548	65.5566	60.459	8.0427	6.86137	7.8214	5.05258e-202	-3.43379	down	40S ribosomal protein SA {ECO:0000255|HAMAP-Rule:MF_03015} OS=Vitis vinifera (Grape) PE=3 SV=1	PREDICTED: 40S ribosomal protein SA-like [Setaria italica]
TraesCS2A01G168400	6.53116	8.58745	8.17204	0	0	0	6.97374e-40	-9.47963	down	Peroxisomal (S)-2-hydroxy-acid oxidase GLO4 OS=Oryza sativa subsp. japonica (Rice) PE=2 SV=2	PREDICTED: peroxisomal (S)-2-hydroxy-acid oxidase GLO4-like [Brachypodium distachyon]
TraesCS2A01G168500	9.88981	8.50769	10.3941	0.091064	0.082324	0.080111	4.15019e-164	-7.09205	down	3-oxoacyl-[acyl-carrier-protein] synthase II, chloroplastic (Precursor) OS=Arabidopsis thaliana (Mouse-ear cress) PE=1 SV=1	beta-ketoacyl-ACP synthase [Hordeum vulgare subsp. vulgare]
TraesCS2A01G168600	5.16004	4.79008	4.40009	0.012836	0.005394	0.016889	2.9808e-116	-8.36992	down	--	predicted protein [Hordeum vulgare subsp. vulgare]
TraesCS2A01G168800	7.06165	7.32545	6.71559	0	0	0	3.05827e-31	-8.63458	down	DNA-directed RNA polymerases II, IV and V subunit 9A GN=K14A17 OS=Arabidopsis thaliana (Mouse-ear cress) PE=1 SV=1	predicted protein [Hordeum vulgare subsp. vulgare]
TraesCS2A01G168900	4.41886	4.49544	4.61875	0.018446	0.008623	0	1.00267e-77	-8.52339	down	Protein argonaute MEL1 GN=OSJNBa0052F07.11 OS=Oryza sativa subsp. japonica (Rice) PE=2 SV=1	Protein argonaute 14 [Triticum urartu]
TraesCS2A01G169000	3.59698	3.17865	2.93935	0.036432	0.043925	0	9.80761e-70	-6.76172	down	--	hypothetical protein F775_09608 [Aegilops tauschii]
TraesCS2A01G169100	9.07051	8.19406	7.96857	0.048829	0	0.022897	4.30211e-76	-7.93695	down	Oligouridylate-binding protein 1B GN=UBP1B OS=Arabidopsis thaliana (Mouse-ear cress) PE=1 SV=1	predicted protein [Hordeum vulgare subsp. vulgare]
TraesCS2A01G169300	38.9086	39.8717	32.3011	0.567728	1.38835	0.143602	1.54292e-13	-5.22634	down	Protein TIFY 10A GN=T29M8.5 OS=Arabidopsis thaliana (Mouse-ear cress) PE=1 SV=1	hypothetical protein F775_32173 [Aegilops tauschii]
TraesCS2A01G169400	1.826	2.10604	1.44446	0	0	0	5.3224e-17	-6.89702	down	--	PREDICTED: uncharacterized protein LOC100846944 isoform X1 [Brachypodium distachyon]
TraesCS2A01G169700	0.962753	1.08756	1.3235	0	0	0	1.47799e-20	-7.40808	down	--	predicted protein [Hordeum vulgare subsp. vulgare]
TraesCS2A01G169800	83.2017	92.1137	79.5489	0	0	0	1.446e-85	-12.4795	down	Elongation factor 1-delta 1 OS=Oryza sativa subsp. japonica (Rice) PE=2 SV=3	putative elongation factor 1 beta [Hordeum vulgare subsp. vulgare]
TraesCS2A01G170000	2.57859	1.60686	2.17256	0	0	0	1.19012e-31	-8.69984	down	--	PREDICTED: uncharacterized protein LOC100843408 [Brachypodium distachyon]
TraesCS2A01G170200	19.0175	19.4186	25.3428	0	0	0	4.8268e-56	-10.7474	down	Protein STRICTOSIDINE SYNTHASE-LIKE 4 {ECO:0000303|PubMed:10777701} (Precursor) OS=Arabidopsis thaliana (Mouse-ear cress) PE=1 SV=1	Adipocyte plasma membrane-associated protein [Aegilops tauschii]
TraesCS2A01G170300	7.13323	8.54102	7.36354	0	0	0	9.4947e-38	-9.26643	down	Protein STRICTOSIDINE SYNTHASE-LIKE 4 {ECO:0000303|PubMed:10777701} (Precursor) OS=Arabidopsis thaliana (Mouse-ear cress) PE=1 SV=1	Adipocyte plasma membrane-associated protein [Aegilops tauschii]
TraesCS2A01G170700	3.27214	3.2799	3.40761	0	0	0.014401	4.50641e-60	-8.28742	down	Exportin-T OS=Oryza sativa subsp. japonica (Rice) PE=2 SV=1	Exportin-T [Triticum urartu]
TraesCS2A01G170800	194.471	198.853	174.045	4.03661	1.43353	1.56292	5.75532e-82	-6.35744	down	60S ribosomal protein L27a-3 OS=Arabidopsis thaliana (Mouse-ear cress) PE=2 SV=2	60S ribosomal protein L27a-3 [Triticum urartu]
TraesCS2A01G170900	7.87266	6.33946	4.8014	0	0	0	5.95873e-42	-9.68596	down	Probable GTP diphosphokinase RSH3, chloroplastic (Precursor) GN=RSH3 OS=Arabidopsis thaliana (Mouse-ear cress) PE=2 SV=1	putative guanosine-3&apos;,5&apos;-bis(diphosphate) 3&apos;-pyrophosphohydrolase [Triticum urartu]
TraesCS2A01G171000	5.37737	3.92458	4.26283	0	0	0	7.35652e-30	-8.50875	down	--	predicted protein [Hordeum vulgare subsp. vulgare]
TraesCS2A01G171100	5.17701	4.09912	3.70929	0	0	0	3.32995e-25	-7.98962	down	--	uncharacterized protein LOC100276973 [Zea mays]
TraesCS2A01G171400	0.877342	0.719183	0.86256	0	0	0	1.52291e-22	-7.64902	down	--	hypothetical protein TRIUR3_25095 [Triticum urartu]
TraesCS2A01G171500	1.43062	2.01285	2.12279	0	0	0	1.84736e-22	-7.65599	down	--	Endothelin-converting enzyme 2 [Aegilops tauschii]
TraesCS2A01G171600	13.6386	10.7818	18.198	0.011336	0.037152	0.107669	4.9349e-67	-7.70495	down	--	predicted protein [Hordeum vulgare subsp. vulgare]
TraesCS2A01G171800	32.9993	38.4199	30.9343	2.09332	2.51175	2.51691	7.4497e-148	-4.0299	down	Probable small nuclear ribonucleoprotein G GN=At2g23930 OS=Arabidopsis thaliana (Mouse-ear cress) PE=2 SV=1	predicted protein [Hordeum vulgare subsp. vulgare]
TraesCS2A01G171900	2.99698	2.70866	3.03394	0.46635	0.34282	0.293559	1.37391e-75	-3.3331	down	DNA mismatch repair protein MSH4 GN=MSH4 OS=Arabidopsis thaliana (Mouse-ear cress) PE=2 SV=1	PREDICTED: DNA mismatch repair protein MSH4 [Brachypodium distachyon]
TraesCS2A01G172000	26.5403	26.6289	22.1301	0.782629	0.825984	0.986893	1.32957e-160	-4.14355	down	40S ribosomal protein S3-3 GN=RPS3C OS=Arabidopsis thaliana (Mouse-ear cress) PE=1 SV=1	40S ribosomal protein S3-3 [Triticum urartu]
TraesCS2A01G172100	16.7026	16.7241	17.3451	0.266099	0.418901	0.186528	3.78608e-139	-5.93506	down	PHD finger protein ALFIN-LIKE 9 OS=Oryza sativa subsp. japonica (Rice) PE=2 SV=1	PHD zinc finger protein [Triticum aestivum]
TraesCS2A01G172400	16.9002	16.9222	15.142	0.652171	0.491998	0.461502	4.02929e-164	-5.04686	down	--	predicted protein [Hordeum vulgare subsp. vulgare]
TraesCS2A01G172500	7.9288	8.34224	9.47315	0.070785	0.041459	0.087846	1.89409e-88	-6.84955	down	Nuclear transcription factor Y subunit A-5 GN=NFYA5 OS=Arabidopsis thaliana (Mouse-ear cress) PE=2 SV=1	nuclear transcription factor Y subunit A9 [Triticum monococcum]
TraesCS2A01G172700	10.9531	11.8047	11.2635	0.270603	0.72774	0.54888	8.40256e-62	-4.62103	down	Acidic leucine-rich nuclear phosphoprotein 32-related protein 1 GN=OSJNBa0072I06.30 OS=Oryza sativa subsp. japonica (Rice) PE=2 SV=1	Acidic leucine-rich nuclear phosphoprotein 32-related protein 1 [Aegilops tauschii]
TraesCS2A01G173100	3.37164	2.34585	2.44796	0	0	0	6.06562e-23	-7.70107	down	--	hypothetical protein F775_30518 [Aegilops tauschii]
TraesCS2A01G173200	36.265	36.7752	49.6888	0.974746	1.71915	2.93182	7.1104e-92	-4.92687	down	Pectinesterase QRT1 (Precursor) GN=MDF20.3 OS=Arabidopsis thaliana (Mouse-ear cress) PE=2 SV=1	Pectinesterase QRT1 [Aegilops tauschii]
TraesCS2A01G173300	3.51703	3.87952	3.43712	0.475845	0.020278	0.164579	0.000233027	-3.36754	down	--	hypothetical protein F775_07573 [Aegilops tauschii]
TraesCS2A01G173400	0.857914	0.972861	0.820332	0	0	0	3.66267e-15	-6.59285	down	Probable carboxylesterase 18 GN=CXE18 OS=Arabidopsis thaliana (Mouse-ear cress) PE=1 SV=1	predicted protein [Hordeum vulgare subsp. vulgare]
TraesCS2A01G173500	2.2402	1.5785	2.28927	0	0	0	3.93962e-18	-7.07043	down	Nuclear transcription factor Y subunit B-3 OS=Arabidopsis thaliana (Mouse-ear cress) PE=2 SV=1	NF-YB1 [Hordeum vulgare]
TraesCS2A01G173600	1.13192	0.909881	0.855391	0	0	0	1.51831e-24	-7.92939	down	ATP-dependent DNA helicase Q-like 5 GN=F28L5.4 OS=Arabidopsis thaliana (Mouse-ear cress) PE=2 SV=2	PREDICTED: putative ATP-dependent helicase HRQ1 [Brachypodium distachyon]
TraesCS2A01G174300	21.6781	22.8497	20.9304	0.968379	0.893372	1.19979	4.56779e-172	-4.48972	down	MADS-box transcription factor 18 GN=OSJNBb0040H10.26 OS=Oryza sativa subsp. japonica (Rice) PE=1 SV=1	MADS2 [Triticum aestivum]
TraesCS2A01G174400	21.0543	21.7	14.6936	0	0	0	3.49039e-55	-10.7041	down	UDP-arabinopyranose mutase 3 OS=Oryza sativa subsp. japonica (Rice) PE=1 SV=1	Alpha-1,4-glucan-protein synthase [UDP-forming] 1 [Triticum urartu]
TraesCS2A01G174500	0.817999	0.756531	0.950535	0	0	0	1.43311e-15	-6.66214	down	PI-PLC X domain-containing protein At5g67130 (Precursor) GN=At5g67130 OS=Arabidopsis thaliana (Mouse-ear cress) PE=1 SV=1	predicted protein [Hordeum vulgare subsp. vulgare]
TraesCS2A01G174700	14.1315	18.2112	12.7504	0.018782	0	0.01867	3.35129e-55	-8.54071	down	Mitochondrial import inner membrane translocase subunit TIM17-2 GN=TIM17-2 OS=Arabidopsis thaliana (Mouse-ear cress) PE=1 SV=2	Os07g0604500 [Oryza sativa Japonica Group]
TraesCS2A01G174800	2.07495	2.17773	2.87712	0	0	0	1.26272e-19	-7.28299	down	Mitochondrial import inner membrane translocase subunit TIM17-1 OS=Arabidopsis thaliana (Mouse-ear cress) PE=2 SV=1	Mitochondrial import inner membrane translocase subunit Tim17 [Aegilops tauschii]
TraesCS2A01G175000	6.84	7.55172	3.42187	0	0	0	1.99881e-35	-9.18201	down	COBRA-like protein 6 (Precursor) GN=OSJNBb0040H10.13 OS=Oryza sativa subsp. japonica (Rice) PE=3 SV=1	COBRA-like protein 6 [Aegilops tauschii]
TraesCS2A01G175100	46.3439	42.5719	48.6703	0	0.022398	0	3.13597e-104	-11.3967	down	COBRA-like protein 1 (Precursor) GN=OSJNBb0040H10.12 OS=Oryza sativa subsp. japonica (Rice) PE=2 SV=1	hypothetical protein TRIUR3_01702 [Triticum urartu]
TraesCS2A01G175300	1.65739	1.87961	2.0444	0	0	0	4.56715e-28	-8.30515	down	--	hypothetical protein TRIUR3_01706 [Triticum urartu]
TraesCS2A01G175400	5.99715	5.10715	6.05029	0	0.062791	0	1.11478e-43	-7.645	down	Probable 6-phosphogluconolactonase 2 OS=Oryza sativa subsp. japonica (Rice) PE=2 SV=1	putative 6-phosphogluconolactonase 2 [Triticum urartu]
TraesCS2A01G175500	6.75802	6.2957	5.52079	0.008866	0.043234	0.017274	1.25714e-68	-7.63515	down	Pentatricopeptide repeat-containing protein PNM1, mitochondrial (Precursor) GN=PNM1 OS=Arabidopsis thaliana (Mouse-ear cress) PE=1 SV=1	predicted protein [Hordeum vulgare subsp. vulgare]
TraesCS2A01G175600	0.727554	0.876723	1.12595	0	0	0	4.70536e-19	-7.21428	down	Protein NRT1/ PTR FAMILY 8.3 GN=F14H20.11 OS=Arabidopsis thaliana (Mouse-ear cress) PE=1 SV=1	Peptide transporter PTR2 [Triticum urartu]
TraesCS2A01G175900	1.13787	1.03047	1.08818	0	0	0	2.21242e-17	-6.93644	down	Putative methylesterase 11, chloroplastic (Precursor) GN=At1gXXXXX OS=Arabidopsis thaliana (Mouse-ear cress) PE=2 SV=1	predicted protein [Hordeum vulgare subsp. vulgare]
TraesCS2A01G176000	0.543573	0.355111	0.648854	0	0	0	9.12944e-20	-7.33497	down	Protein LONGIFOLIA 1 GN=T20K14.190 OS=Arabidopsis thaliana (Mouse-ear cress) PE=1 SV=1	predicted protein [Hordeum vulgare subsp. vulgare]
TraesCS2A01G176100	8.70723	7.77842	6.36021	0	0.018901	0	2.24827e-60	-9.22089	down	--	Putative G3BP-like protein [Triticum urartu]
TraesCS2A01G176200	2.15402	1.68534	2.11948	0.015944	0	0	1.38192e-36	-7.53929	down	--	predicted protein [Hordeum vulgare subsp. vulgare]
TraesCS2A01G176300	10.7549	10.5195	9.41945	0.027104	0.072266	0.080374	6.45865e-87	-7.09457	down	Ninja-family protein 1 GN=AFP-A1 OS=Triticum aestivum (Wheat) PE=3 SV=1	RecName: Full=Ninja-family protein 1; AltName: Full=ABI five-binding protein A1; Short=ABI5-binding protein A1; Short=TaAFP-A1 [Triticum aestivum]
TraesCS2A01G176400	24.448	18.8462	13.3807	0.046344	0	0	7.45107e-26	-8.13352	down	Glycerophosphodiester phosphodiesterase GDPD6 {ECO:0000305} (Precursor) OS=Arabidopsis thaliana (Mouse-ear cress) PE=2 SV=1	PREDICTED: glycerophosphodiester phosphodiesterase GDPD6-like [Brachypodium distachyon]
TraesCS2A01G176500	1.63529	1.60386	1.38187	0.060401	0.085559	0.056705	2.34296e-69	-4.6023	down	LRR receptor-like serine/threonine-protein kinase RPK2 (Precursor) OS=Arabidopsis thaliana (Mouse-ear cress) PE=2 SV=1	predicted protein [Hordeum vulgare subsp. vulgare]
TraesCS2A01G176700	1.58715	1.45978	1.18952	0	0	0	2.81887e-27	-8.24364	down	Glycine-rich RNA-binding protein 3, mitochondrial (Precursor) GN=MAF19_30 OS=Arabidopsis thaliana (Mouse-ear cress) PE=2 SV=1	PREDICTED: glycine-rich RNA-binding protein 3, mitochondrial-like isoform X1 [Setaria italica]
TraesCS2A01G177000	3.4984	2.87433	3.77314	0	0	0	6.56574e-35	-9.01578	down	SNF1-related protein kinase regulatory subunit gamma-1-like GN=CBSCBS2 OS=Arabidopsis thaliana (Mouse-ear cress) PE=1 SV=1	SNF1-related protein kinase regulatory subunit gamma 1 [Triticum urartu]
TraesCS2A01G177300	5.05429	3.79722	3.96205	0	0	0	8.74168e-33	-8.80459	down	--	predicted protein [Hordeum vulgare subsp. vulgare]
TraesCS2A01G177600	9.50659	9.40095	8.93208	0	0	0	5.98527e-37	-9.17849	down	PLASMODESMATA CALLOSE-BINDING PROTEIN 3 (Precursor) GN=PDCB3 OS=Arabidopsis thaliana (Mouse-ear cress) PE=1 SV=1	hypothetical protein F775_05671 [Aegilops tauschii]
TraesCS2A01G177700	3.92473	3.10788	3.06129	0.058275	0	0	6.28186e-05	-4.31103	down	Ribosome biogenesis protein WDR12 homolog {ECO:0000255|HAMAP-Rule:MF_03029} GN=CHLREDRAFT_128420 OS=Chlamydomonas reinhardtii (Chlamydomonas smithii) PE=1 SV=2	hypothetical protein F775_31318 [Aegilops tauschii]
TraesCS2A01G178500	1.52331	1.3461	0.717823	0	0	0	9.41756e-18	-7.06506	down	Probable E3 ubiquitin-protein ligase ARI9 GN=ARI9 OS=Arabidopsis thaliana (Mouse-ear cress) PE=2 SV=1	Putative E3 ubiquitin-protein ligase [Aegilops tauschii]
TraesCS2A01G178900	8.88275	8.97034	7.3511	0	0	0	4.42397e-33	-8.82562	down	Serine/arginine-rich SC35-like splicing factor SCL30A GN=SCL30A OS=Arabidopsis thaliana (Mouse-ear cress) PE=1 SV=1	MKI67 FHA domain-interacting nucleolar phosphoprotein-like protein [Triticum urartu]
TraesCS2A01G179800	4.18411	4.0093	4.5239	0	0	0	6.13045e-35	-8.99376	down	--	predicted protein [Hordeum vulgare subsp. vulgare]
TraesCS2A01G179900	1.50073	1.41841	1.42093	0.020657	0.012756	0.026007	5.29907e-44	-5.83958	down	--	hypothetical protein F775_04962 [Aegilops tauschii]
TraesCS2A01G180100	0.59538	0.473101	0.440303	0	0	0	1.8673e-21	-7.51988	down	--	hypothetical protein TRIUR3_14112 [Triticum urartu]
TraesCS2A01G180200	29.5225	27.4239	23.2028	0.059138	0.087203	0	1.18802e-113	-8.84206	down	--	Aldose 1-epimerase [Triticum urartu]
TraesCS2A01G180500	1.62641	1.41101	1.17522	0	0	0	5.14793e-23	-7.72092	down	--	hypothetical protein TRIUR3_25121 [Triticum urartu]
TraesCS2A01G180900	0.818156	0.758856	0.644821	0	0	0	2.67929e-20	-7.35548	down	--	hypothetical protein TRIUR3_14270 [Triticum urartu]
TraesCS2A01G181100	0.990069	1.11548	0.933603	0	0	0	9.72386e-20	-7.28072	down	--	hypothetical protein F775_15861 [Aegilops tauschii]
TraesCS2A01G181200	10.3619	6.92483	10.7454	0	0	0	2.25373e-46	-10.0527	down	Zinc finger protein ZAT4 GN=ZAT4 OS=Arabidopsis thaliana (Mouse-ear cress) PE=2 SV=1	PREDICTED: uncharacterized protein LOC102718758 [Oryza brachyantha]
TraesCS2A01G181300	1.80563	1.57517	1.60983	0	0	0	6.92795e-25	-7.93031	down	--	hypothetical protein TRIUR3_14270 [Triticum urartu]
TraesCS2A01G181900	3.02671	3.0164	2.79749	0	0	0	5.28811e-44	-9.79243	down	TATA-binding protein-associated factor BTAF1 GN=F24B22.240 OS=Arabidopsis thaliana (Mouse-ear cress) PE=1 SV=1	PREDICTED: DNA annealing helicase and endonuclease ZRANB3 isoform X1 [Brachypodium distachyon]
TraesCS2A01G182000	6.2408	6.32844	6.18231	0	0	0.025643	2.88683e-37	-7.98168	down	EID1-like F-box protein 2 GN=EDL2 OS=Arabidopsis thaliana (Mouse-ear cress) PE=2 SV=1	EID1-like F-box protein 2 [Triticum urartu]
TraesCS2A01G182100	32.7777	24.1668	26.6117	0	0	0	8.95555e-53	-10.4985	down	Non-specific lipid transfer protein GPI-anchored 2 (Precursor) GN=T28A8.10 OS=Arabidopsis thaliana (Mouse-ear cress) PE=2 SV=1	hypothetical protein F775_14023 [Aegilops tauschii]
TraesCS2A01G182200	2.75963	2.37427	2.52757	0	0.011132	0.105286	0.000448895	-3.80428	down	SNF2 domain-containing protein CLASSY 3 GN=At1g05490 OS=Arabidopsis thaliana (Mouse-ear cress) PE=1 SV=1	DNA repair protein rhp54 [Triticum urartu]
TraesCS2A01G182300	0.881175	1.25921	1.17393	0	0	0	3.80189e-20	-7.3312	down	--	predicted protein [Hordeum vulgare subsp. vulgare]
TraesCS2A01G182400	0.892232	0.813598	0.770903	0	0	0	2.76465e-25	-7.98034	down	Probable LRR receptor-like serine/threonine-protein kinase At1g74360 (Precursor) GN=At1g74360 OS=Arabidopsis thaliana (Mouse-ear cress) PE=2 SV=1	predicted protein [Hordeum vulgare subsp. vulgare]
TraesCS2A01G182500	5.03683	4.57913	13.0108	0	0	0	1.18275e-35	-9.33437	down	Probable mitochondrial saccharopine dehydrogenase-like oxidoreductase At5g39410 GN=At5g39410 OS=Arabidopsis thaliana (Mouse-ear cress) PE=1 SV=2	predicted protein [Hordeum vulgare subsp. vulgare]
TraesCS2A01G182600	32.0928	31.5642	28.929	0.042519	0	0.171713	1.97714e-16	-6.9022	down	Eukaryotic translation initiation factor 5A GN=TIF5A OS=Zea mays (Maize) PE=1 SV=2	Eukaryotic translation initiation factor 5A [Aegilops tauschii]
TraesCS2A01G182700	1.2695	1.11118	0.863214	0	0	0	6.71996e-19	-7.18069	down	Probable WRKY transcription factor 3 GN=WRKY3 OS=Arabidopsis thaliana (Mouse-ear cress) PE=2 SV=1	WRKY19 transcription factor [Triticum aestivum]
TraesCS2A01G182800	2.24931	2.24126	2.17246	0	0	0	3.409e-35	-9.01582	down	Probable serine/threonine-protein kinase At1g54610 GN=At1g54610 OS=Arabidopsis thaliana (Mouse-ear cress) PE=1 SV=1	predicted protein [Hordeum vulgare subsp. vulgare]
TraesCS2A01G182900	3.01615	2.34195	2.9203	0.102862	0.135911	0.128782	1.87438e-95	-4.59436	down	Formin-like protein 5 GN=P0453E05.107 OS=Oryza sativa subsp. japonica (Rice) PE=2 SV=2	PREDICTED: LOW QUALITY PROTEIN: formin-like protein 5 [Brachypodium distachyon]
TraesCS2A01G183000	4.62168	3.65169	3.32612	0	0.052005	0	0.000315311	-4.03949	down	Formin-like protein 5 GN=P0453E05.107 OS=Oryza sativa subsp. japonica (Rice) PE=2 SV=2	Formin-like protein 5 [Aegilops tauschii]
TraesCS2A01G183100	2.92855	2.54674	2.24276	0	0	0	1.14701e-22	-7.67072	down	--	predicted protein [Hordeum vulgare subsp. vulgare]
TraesCS2A01G183200	0.882165	0.640724	0.849273	0.112388	0.05898	0.222002	8.07231e-14	-3.13998	down	Probable protein S-acyltransferase 22 GN=PAT22 OS=Arabidopsis thaliana (Mouse-ear cress) PE=2 SV=2	PREDICTED: probable protein S-acyltransferase 22 [Brachypodium distachyon]
TraesCS2A01G183300	1.29567	0.93935	1.34283	0.045146	0.011219	0.030087	1.72988e-19	-4.90693	down	--	predicted protein [Hordeum vulgare subsp. vulgare]
TraesCS2A01G183600	12.0348	9.48883	8.98821	0.025798	0	0.025814	2.79607e-42	-7.59765	down	MFP1 attachment factor 1 GN=MAF1 OS=Solanum lycopersicum (Tomato) PE=1 SV=1	PREDICTED: MFP1 attachment factor 1-like [Brachypodium distachyon]
TraesCS2A01G183700	4.4812	4.66503	3.81433	0	0	0	1.03615e-27	-8.28601	down	--	predicted protein [Hordeum vulgare subsp. vulgare]
TraesCS2A01G183900	13.3341	17.135	12.71	0.048664	0.091539	0	6.61459e-15	-6.5633	down	Probable indole-3-acetic acid-amido synthetase GH3.8 OS=Oryza sativa subsp. japonica (Rice) PE=2 SV=1	predicted protein [Hordeum vulgare subsp. vulgare]
TraesCS2A01G184000	16.2132	15.7884	13.5124	0	0.060256	0	1.82432e-46	-8.24549	down	40S ribosomal protein S13-1 OS=Oryza sativa subsp. japonica (Rice) PE=3 SV=2	40S ribosomal protein S13-1 [Triticum urartu]
TraesCS2A01G184200	9.8588	10.301	9.93997	0.051637	0.011044	0.286946	2.52633e-20	-6.02939	down	Adenylyl-sulfate kinase 3 GN=APK3 OS=Arabidopsis thaliana (Mouse-ear cress) PE=1 SV=1	predicted protein [Hordeum vulgare subsp. vulgare]
TraesCS2A01G184400	9.04172	8.31064	8.73449	0.114093	0.06344	0.1137	7.83445e-133	-6.49028	down	1-phosphatidylinositol-3-phosphate 5-kinase FAB1B GN=FAB1B OS=Arabidopsis thaliana (Mouse-ear cress) PE=2 SV=1	unknown [Triticum aestivum]
TraesCS2A01G184600	0.829464	0.63505	0.749134	0.007014	0.007551	0.007018	1.86844e-36	-5.94536	down	Probable disease resistance RPP8-like protein 2 GN=RPP8L2 OS=Arabidopsis thaliana (Mouse-ear cress) PE=3 SV=1	Disease resistance protein RPM1 [Triticum urartu]
TraesCS2A01G184700	5.1995	5.67935	6.76119	0.012585	0	0	3.11728e-45	-8.68406	down	--	predicted protein [Hordeum vulgare subsp. vulgare]
TraesCS2A01G184800	2.92518	2.59173	2.11341	0	0.017365	0.192478	9.6281e-05	-4.00796	down	CMP-sialic acid transporter 4 OS=Arabidopsis thaliana (Mouse-ear cress) PE=2 SV=1	predicted protein [Hordeum vulgare subsp. vulgare]
TraesCS2A01G184900	9.21579	11.0083	7.88929	1.8866	1.86937	2.10202	3.98436e-40	-2.44872	down	Glutamyl-tRNA reductase-binding protein, chloroplastic {ECO:0000303|PubMed:22180625} (Precursor) OS=Arabidopsis thaliana (Mouse-ear cress) PE=1 SV=1	predicted protein [Hordeum vulgare subsp. vulgare]
TraesCS2A01G185300	1.19483	1.3511	1.01052	0.069466	0.117792	0.133864	1.69866e-33	-3.56863	down	Switch 2 {ECO:0000312|EMBL:AEE27606.1} OS=Arabidopsis thaliana (Mouse-ear cress) PE=3 SV=1	Putative DNA repair and recombination protein RAD26-like protein [Triticum urartu]
TraesCS2A01G185400	4.70547	4.29381	5.65564	0	0	0	9.45274e-31	-8.60171	down	--	hypothetical protein TRIUR3_10143 [Triticum urartu]
TraesCS2A01G185500	49.0815	57.399	56.7295	0.018737	0	0.034985	4.45865e-125	-10.9261	down	Tubulin alpha-1 chain GN=TUBA1 OS=Hordeum vulgare (Barley) PE=2 SV=1	alpha tubulin-1D [Triticum aestivum]
TraesCS2A01G185600	1.40161	1.75652	1.40542	0	0	0	2.08224e-18	-7.09963	down	Ethylene-responsive transcription factor RAP2-11 GN=T29J13.210 OS=Arabidopsis thaliana (Mouse-ear cress) PE=2 SV=1	predicted protein [Hordeum vulgare subsp. vulgare]
TraesCS2A01G185700	11.8951	9.1523	9.61532	0.352923	0.291383	0.397864	9.69034e-176	-4.93722	down	--	predicted protein [Hordeum vulgare subsp. vulgare]
TraesCS2A01G186000	2.04341	1.50101	1.88133	0.112312	0.048602	0.030118	7.91623e-24	-4.53477	down	--	hypothetical protein F775_02712 [Aegilops tauschii]
TraesCS2A01G186700	0.982622	0.950043	0.880442	0	0	0	3.41116e-21	-7.47114	down	--	predicted protein [Hordeum vulgare subsp. vulgare]
TraesCS2A01G186900	3.8574	4.73482	4.83895	0	0.024274	0.049346	1.57349e-75	-7.19787	down	Glucan endo-1,3-beta-glucosidase 4 (Precursor) GN=At3g13560 OS=Arabidopsis thaliana (Mouse-ear cress) PE=1 SV=1	Glucan endo-1,3-beta-glucosidase 4 [Triticum urartu]
TraesCS2A01G187000	3.51036	4.95802	2.8026	0	0	0	2.3712e-26	-8.14476	down	Constitutive photomorphogenesis protein 10 GN=COP10 OS=Arabidopsis thaliana (Mouse-ear cress) PE=1 SV=1	PREDICTED: constitutive photomorphogenesis protein 10 [Brachypodium distachyon]
TraesCS2A01G187200	166.056	117.587	159.361	3.31087	4.06578	3.82179	2.44139e-249	-5.63118	down	Chlorophyll a-b binding protein 7, chloroplastic (Precursor) GN=CAB7 OS=Solanum lycopersicum (Tomato) PE=3 SV=1	LHCI-680, photosystem I antenna protein [Hordeum vulgare subsp. vulgare]
TraesCS2A01G187300	90.7255	103.308	87.8574	2.42941	1.8483	1.76722	1.41278e-273	-5.71379	down	Probable succinyl-CoA ligase [ADP-forming] subunit alpha, mitochondrial (Precursor) OS=Oryza sativa subsp. japonica (Rice) PE=1 SV=1	predicted protein [Hordeum vulgare subsp. vulgare]
TraesCS2A01G187500	6.27829	7.61427	6.53391	0	0	0	6.53447e-33	-8.81226	down	Bet1-like protein At4g14600 GN=At4g14600 OS=Arabidopsis thaliana (Mouse-ear cress) PE=2 SV=1	predicted protein [Hordeum vulgare subsp. vulgare]
TraesCS2A01G187600	12.0418	11.661	8.46979	0.606229	0.566641	0.676671	1.16656e-82	-5.31114	down	--	hypothetical protein F775_06308 [Aegilops tauschii]
TraesCS2A01G187700	3.1219	2.81346	3.23925	0.374891	0.224298	0.290519	6.19207e-44	-3.47632	down	5-formyltetrahydrofolate cyclo-ligase, mitochondrial (Precursor) GN=5FCL OS=Arabidopsis thaliana (Mouse-ear cress) PE=1 SV=1	predicted protein [Hordeum vulgare subsp. vulgare]
TraesCS2A01G187800	2.34076	2.68006	2.73779	0.0225	0	0	1.35265e-31	-7.0949	down	Protein BZR1 homolog 1 OS=Oryza sativa subsp. japonica (Rice) PE=1 SV=1	predicted protein [Hordeum vulgare subsp. vulgare]
TraesCS2A01G187900	1.11428	0.864878	1.56421	0	0	0	4.03367e-20	-7.38503	down	Geranylgeranyl pyrophosphate synthase, chloroplastic (Precursor) GN=GGPS OS=Hevea brasiliensis (Para rubber tree) PE=1 SV=1	predicted protein [Hordeum vulgare subsp. vulgare]
TraesCS2A01G188000	10.9686	11.237	12.9331	0.371305	0.454904	0.410994	1.78996e-128	-4.9557	down	UDP-galactose transporter 2 GN=UDP-GALT2 OS=Arabidopsis thaliana (Mouse-ear cress) PE=2 SV=1	hypothetical protein F775_27931 [Aegilops tauschii]
TraesCS2A01G188100	9.82012	9.65358	9.7137	0.049628	0.131086	0.054535	1.57982e-123	-6.943	down	RuvB-like protein 1 GN=RIN1 OS=Arabidopsis thaliana (Mouse-ear cress) PE=1 SV=1	RuvB-like protein 2 [Aegilops tauschii]
TraesCS2A01G188200	4.59109	4.03231	3.9416	0.019699	0.051366	0.086548	1.98221e-86	-5.56848	down	--	PREDICTED: uncharacterized protein LOC100840095 isoform X1 [Brachypodium distachyon]
TraesCS2A01G188400	2.64992	2.19439	3.21024	0.08993	0.119672	0.25999	1.27327e-34	-4.16764	down	Protein indeterminate-domain 1 {ECO:0000303|PubMed:16784536} OS=Arabidopsis thaliana (Mouse-ear cress) PE=1 SV=1	Zinc finger protein MAGPIE [Aegilops tauschii]
TraesCS2A01G188600	5.39318	7.27889	5.88286	0.015137	0	0	7.19514e-48	-8.89747	down	Polyol transporter 5 GN=PLT5 OS=Arabidopsis thaliana (Mouse-ear cress) PE=1 SV=2	Polyol transporter 5 [Triticum urartu]
TraesCS2A01G188700	1.71587	2.87996	2.19585	0.03232	0	0	3.83402e-33	-6.86656	down	Putative polyol transporter 1 GN=PLT1 OS=Arabidopsis thaliana (Mouse-ear cress) PE=3 SV=1	predicted protein [Hordeum vulgare subsp. vulgare]
TraesCS2A01G189100	3.65695	4.5737	5.67395	0	0	0.008681	2.05036e-50	-9.10442	down	Polyol transporter 5 GN=PLT5 OS=Arabidopsis thaliana (Mouse-ear cress) PE=1 SV=2	predicted protein [Hordeum vulgare subsp. vulgare]
TraesCS2A01G189200	0.777316	0.927758	0.842532	0.04833	0.116758	0.035926	1.27268e-25	-4.06471	down	--	hypothetical protein F775_02643 [Aegilops tauschii]
TraesCS2A01G189400	25.7052	27.1451	24.4595	0.487927	0.949908	0.411217	8.20962e-104	-5.49355	down	Proteasome subunit alpha type-2 GN=OSJNBb0058G04.11 OS=Oryza sativa subsp. japonica (Rice) PE=2 SV=1	Proteasome subunit alpha type-2 [Triticum urartu]
TraesCS2A01G189500	5.29872	5.21397	5.20742	0.301829	0.158048	0.295827	1.43789e-86	-4.40729	down	Putative 1-phosphatidylinositol-3-phosphate 5-kinase FAB1C GN=FAB1C OS=Arabidopsis thaliana (Mouse-ear cress) PE=2 SV=1	1-phosphatidylinositol-3-phosphate 5-kinase fab1 [Aegilops tauschii]
TraesCS2A01G189700	9.2558	8.58208	8.89721	0.476844	0.370262	0.532314	1.36966e-160	-4.4454	down	Probable WRKY transcription factor 20 GN=WRKY20 OS=Arabidopsis thaliana (Mouse-ear cress) PE=2 SV=1	WRKY17 transcription factor [Triticum aestivum]
TraesCS2A01G190000	3.47706	3.247	3.69968	0.062981	0.126567	0.254546	4.66063e-30	-4.54434	down	--	predicted protein [Hordeum vulgare subsp. vulgare]
TraesCS2A01G190100	10.812	12.3806	11.5808	0.384066	0.241748	0.479697	2.75472e-55	-3.70352	down	Putative yippee-like protein Os10g0369500 OS=Oryza sativa subsp. japonica (Rice) PE=3 SV=1	predicted protein [Hordeum vulgare subsp. vulgare]
TraesCS2A01G190200	13.0041	11.7204	10.8832	0.219127	0.075337	0.495435	4.715e-44	-5.44672	down	Probable serine/threonine-protein kinase WNK5 OS=Oryza sativa subsp. japonica (Rice) PE=2 SV=1	predicted protein [Hordeum vulgare subsp. vulgare]
TraesCS2A01G190400	10.9852	12.0993	10.5015	0.707992	0.654027	0.792538	1.09402e-192	-4.14138	down	Heterogeneous nuclear ribonucleoprotein 1 GN=RNP1 OS=Arabidopsis thaliana (Mouse-ear cress) PE=1 SV=1	predicted protein [Hordeum vulgare subsp. vulgare]
TraesCS2A01G190700	36.6919	29.7068	21.1129	0.083332	0.050364	0.040628	3.86572e-143	-8.7296	down	NADP-dependent glyceraldehyde-3-phosphate dehydrogenase GN=GAPN OS=Triticum aestivum (Wheat) PE=1 SV=2	NADP-dependent glyceraldehyde-3-phosphate dehydrogenase [Triticum urartu]
TraesCS2A01G190800	5.78532	4.91769	6.74027	0	0.068368	0.019352	1.19436e-62	-7.38166	down	U-box domain-containing protein 4 GN=PUB4 OS=Arabidopsis thaliana (Mouse-ear cress) PE=1 SV=3	predicted protein [Hordeum vulgare subsp. vulgare]
TraesCS2A01G190900	8.80738	10.3533	9.22088	0.053568	0.061335	0.048153	4.35231e-99	-7.3089	down	--	predicted protein [Hordeum vulgare subsp. vulgare]
TraesCS2A01G191000	29.8447	31.9948	26.0754	0.826915	0.881588	0.705875	4.37334e-249	-5.33114	down	Putative MO25-like protein At5g47540 GN=At5g47540 OS=Arabidopsis thaliana (Mouse-ear cress) PE=2 SV=1	PREDICTED: putative MO25-like protein At5g47540 [Brachypodium distachyon]
TraesCS2A01G191100	2.54408	1.58041	2.56789	0.03308	0.009971	0.028178	1.22674e-81	-5.97329	down	Probable amino-acid acetyltransferase NAGS2, chloroplastic (Precursor) GN=NAGS2 OS=Arabidopsis thaliana (Mouse-ear cress) PE=2 SV=1	predicted protein [Hordeum vulgare subsp. vulgare]
TraesCS2A01G191200	10.7362	12.9356	5.67343	0	0	0.06412	3.46782e-36	-7.6008	down	--	hypothetical protein F775_06036 [Aegilops tauschii]
TraesCS2A01G191300	31.4291	40.21	55.0801	0	0	0	8.96634e-54	-10.6581	down	--	hypothetical protein F775_42698 [Aegilops tauschii]
TraesCS2A01G191500	48.1467	57.3061	50.3277	0.517727	0.172975	0.2106	8.3234e-156	-7.47564	down	NADH dehydrogenase [ubiquinone] iron-sulfur protein 4, mitochondrial (Precursor) GN=FRO1 OS=Arabidopsis thaliana (Mouse-ear cress) PE=2 SV=1	predicted protein [Hordeum vulgare subsp. vulgare]
TraesCS2A01G191700	2.51052	2.61868	3.0432	0	0	0	2.29754e-30	-8.55293	down	Omega-hydroxypalmitate O-feruloyl transferase GN=MEE6.11 OS=Arabidopsis thaliana (Mouse-ear cress) PE=1 SV=1	Omega-hydroxypalmitate O-feruloyl transferase [Triticum urartu]
TraesCS2A01G192000	5.62758	5.16657	4.4928	0	0	0	2.09186e-32	-8.75793	down	--	predicted protein [Hordeum vulgare subsp. vulgare]
TraesCS2A01G192100	2.2203	2.9805	2.87627	0	0	0	1.92364e-26	-8.14024	down	GDSL esterase/lipase At3g26430 (Precursor) GN=At3g26430 OS=Arabidopsis thaliana (Mouse-ear cress) PE=2 SV=1	GDSL esterase/lipase [Aegilops tauschii]
TraesCS2A01G192200	8.50422	7.37957	6.95493	0	0.125139	0.018018	3.97704e-07	-5.03743	down	SUMO-activating enzyme subunit 2 GN=F3K23.23 OS=Arabidopsis thaliana (Mouse-ear cress) PE=1 SV=1	SUMO-activating enzyme subunit 2 [Triticum urartu]
TraesCS2A01G192400	2.12291	1.9628	1.86672	0.012088	0	0	1.47507e-35	-7.83936	down	--	hypothetical protein TRIUR3_15696 [Triticum urartu]
TraesCS2A01G192500	1.434	2.28592	1.38896	0	0	0	9.02377e-18	-7.0425	down	GDSL esterase/lipase At4g10955 GN=At4g10955 OS=Arabidopsis thaliana (Mouse-ear cress) PE=2 SV=1	predicted protein [Hordeum vulgare subsp. vulgare]
TraesCS2A01G192600	1.53214	1.73898	2.06196	0.003599	0.02309	0	1.95404e-34	-6.74695	down	Protein SHORT-ROOT 1 OS=Oryza sativa subsp. japonica (Rice) PE=1 SV=2	predicted protein [Hordeum vulgare subsp. vulgare]
TraesCS2A01G192700	5.27913	5.45648	5.40869	0	0	0.034282	4.6954e-56	-8.06128	down	--	predicted protein [Hordeum vulgare subsp. vulgare]
TraesCS2A01G192800	0.557696	0.565661	0.663999	0	0	0	1.4277e-15	-6.66123	down	BTB/POZ domain-containing protein At3g49900 GN=At3g49900 OS=Arabidopsis thaliana (Mouse-ear cress) PE=2 SV=1	hypothetical protein OsI_26670 [Oryza sativa Indica Group]
TraesCS2A01G192900	6.69062	7.20745	6.13262	0	0	0	7.3231e-45	-9.86807	down	Eukaryotic peptide chain release factor subunit 1-3 GN=ERF1-3 OS=Arabidopsis thaliana (Mouse-ear cress) PE=1 SV=1	predicted protein [Hordeum vulgare subsp. vulgare]
TraesCS2A01G193000	2.9243	3.45371	3.38196	0	0	0	6.85915e-28	-8.28577	down	U-box domain-containing protein 4 GN=PUB4 OS=Arabidopsis thaliana (Mouse-ear cress) PE=1 SV=3	predicted protein [Hordeum vulgare subsp. vulgare]
TraesCS2A01G193100	1.92195	1.75003	1.79773	0.027059	0.020809	0.01132	1.10819e-46	-6.00276	down	--	hypothetical protein F775_15687 [Aegilops tauschii]
TraesCS2A01G193300	10.3926	11.0342	9.95384	0.201286	0.085613	0.30067	6.59493e-105	-5.78628	down	--	hypothetical protein F775_28667 [Aegilops tauschii]
TraesCS2A01G193700	2.93703	2.82594	2.82176	0	0	0	1.59741e-36	-9.13938	down	Formin-like protein 13 (Precursor) OS=Oryza sativa subsp. japonica (Rice) PE=2 SV=1	Formin-like protein 13 [Triticum urartu]
TraesCS2A01G193800	25.9597	21.788	23.2652	0	0.018798	0.032885	2.40044e-111	-10.009	down	Omega-6 fatty acid desaturase, chloroplastic (Precursor) OS=Brassica napus (Rape) PE=2 SV=1	PREDICTED: omega-6 fatty acid desaturase, chloroplastic [Brachypodium distachyon]
TraesCS2A01G194300	4.02503	4.33567	3.86483	0	0	0.023891	5.78072e-53	-8.25419	down	--	PREDICTED: uncharacterized protein LOC100838344 [Brachypodium distachyon]
TraesCS2A01G194400	2.74188	2.78291	1.95558	0	0	0	6.81831e-23	-7.71539	down	--	hypothetical protein TRIUR3_29171 [Triticum urartu]
TraesCS2A01G194500	21.2184	21.757	24.657	0.198509	0	0.206857	5.62353e-15	-6.20339	down	LOB domain-containing protein 37 GN=K8K14.16 OS=Arabidopsis thaliana (Mouse-ear cress) PE=2 SV=1	predicted protein [Hordeum vulgare subsp. vulgare]
TraesCS2A01G194900	6.61165	6.59957	6.13122	0	0	0	5.00137e-42	-9.62568	down	--	predicted protein [Hordeum vulgare subsp. vulgare]
TraesCS2A01G195000	2.63152	3.61613	3.43968	0	0	0	7.04783e-22	-7.58568	down	--	hypothetical protein F775_25133 [Aegilops tauschii]
TraesCS2A01G195100	3.17367	4.75871	3.39759	0	0	0	1.02756e-18	-7.16501	down	--	--
TraesCS2A01G195800	10.2769	10.5299	10.3949	0.343439	0.279294	0.189706	3.18103e-167	-5.40388	down	Aspartic proteinase-like protein 2 (Precursor) GN=At1g65240 OS=Arabidopsis thaliana (Mouse-ear cress) PE=1 SV=2	predicted protein [Hordeum vulgare subsp. vulgare]
TraesCS2A01G196000	5.81102	5.90363	5.43341	0	0	0	2.07233e-41	-9.57458	down	--	hypothetical protein F775_03160 [Aegilops tauschii]
TraesCS2A01G196100	1.06245	1.17867	1.35469	0.100369	0	0	9.19528e-23	-6.63262	down	--	hypothetical protein TRIUR3_16465 [Triticum urartu]
TraesCS2A01G196300	1.6859	0.768938	1.8663	0	0	0	4.28403e-24	-7.92958	down	--	hypothetical protein TRIUR3_10835 [Triticum urartu]
TraesCS2A01G196600	5.40199	5.57343	6.17451	0	0	0	2.4095e-19	-7.22444	down	Probable protein BRICK1 GN=OJ1124_D06.16 OS=Oryza sativa subsp. japonica (Rice) PE=3 SV=1	hypothetical protein TRIUR3_10832 [Triticum urartu]
TraesCS2A01G196700	1.21917	0.968943	1.40971	0.006049	0.025872	0.008257	4.62308e-33	-5.84425	down	Phenylalanine ammonia-lyase GN=PAL OS=Triticum aestivum (Wheat) PE=3 SV=1	predicted protein [Hordeum vulgare subsp. vulgare]
TraesCS2A01G196900	3.31974	3.15976	3.01005	0	0	0	1.44562e-30	-8.55881	down	Protein Mut11 GN=Mut11 OS=Chlamydomonas reinhardtii (Chlamydomonas smithii) PE=2 SV=1	predicted protein [Hordeum vulgare subsp. vulgare]
TraesCS2A01G197100	6.27662	6.18211	6.69422	0	0.052486	0	7.85758e-09	-5.65755	down	--	Pre-mRNA-splicing factor 18 [Triticum urartu]
TraesCS2A01G197300	0.8337	0.770094	1.1039	0	0	0	2.95406e-18	-7.08986	down	Organic cation/carnitine transporter 7 GN=MGH6.16 OS=Arabidopsis thaliana (Mouse-ear cress) PE=2 SV=1	predicted protein [Hordeum vulgare subsp. vulgare]
TraesCS2A01G197400	2.48049	2.02895	2.20767	0	0	0	1.80237e-25	-8.00333	down	--	hypothetical protein F775_27626 [Aegilops tauschii]
TraesCS2A01G197600	8.65013	9.30201	5.33217	0	0	0	1.02271e-33	-8.95659	down	Fatty-acid-binding protein 1 GN=FAP1 OS=Arabidopsis thaliana (Mouse-ear cress) PE=1 SV=1	hypothetical protein F775_52498 [Aegilops tauschii]
TraesCS2A01G197700	4.38296	3.426	3.15393	0	0	0	6.19609e-37	-9.20454	down	Vacuole membrane protein KMS1 {ECO:0000303|PubMed:21294794} OS=Arabidopsis thaliana (Mouse-ear cress) PE=1 SV=1	predicted protein [Hordeum vulgare subsp. vulgare]
TraesCS2A01G197800	14.4809	12.3077	12.5159	0.187369	0.110579	0.233983	1.12166e-160	-6.27073	down	Protein TIME FOR COFFEE GN=TIC OS=Arabidopsis thaliana (Mouse-ear cress) PE=1 SV=2	Protein TIME FOR COFFEE [Aegilops tauschii]
TraesCS2A01G197900	2.85215	3.1155	3.33525	0.539505	0.24523	0.502904	5.1536e-25	-2.91304	down	Ribosome-recycling factor, chloroplastic (Precursor) OS=Oryza sativa subsp. japonica (Rice) PE=2 SV=2	predicted protein [Hordeum vulgare subsp. vulgare]
TraesCS2A01G198000	34.9738	40.8247	33.7901	0.028677	0.076767	0.056756	7.5285e-131	-8.95155	down	Mavicyanin OS=Cucurbita pepo (Vegetable marrow) PE=1 SV=1	predicted protein [Hordeum vulgare subsp. vulgare]
TraesCS2A01G198400	14.1245	12.9008	11.6807	0.013387	0.090429	0.142727	1.90967e-23	-6.5385	down	Zinc-metallopeptidase, peroxisomal GN=PXM16 OS=Arabidopsis thaliana (Mouse-ear cress) PE=2 SV=1	predicted protein [Hordeum vulgare subsp. vulgare]
TraesCS2A01G198500	74.7129	89.9819	76.5609	0.019235	0.51672	0.873428	9.75914e-10	-5.63417	down	Aquaporin PIP2-1 GN=PIP2-1 OS=Zea mays (Maize) PE=1 SV=2	plasma membrane intrinsic protein [Hordeum vulgare]
TraesCS2A01G198600	2.49742	2.55354	3.11795	0	0	0	2.36841e-23	-7.7606	down	Zinc finger AN1 and C2H2 domain-containing stress-associated protein 16 GN=OJ1019_E02.22 OS=Oryza sativa subsp. japonica (Rice) PE=2 SV=2	predicted protein [Hordeum vulgare subsp. vulgare]
TraesCS2A01G199100	3.71681	2.32032	2.09468	0	0.145746	0.067478	0.000309058	-3.7088	down	--	unnamed protein product [Triticum aestivum]
TraesCS2A01G199300	5.80409	5.76397	5.70171	0.013726	0	0.035245	1.58315e-47	-7.52002	down	--	predicted protein [Hordeum vulgare subsp. vulgare]
TraesCS2A01G199400	2.60482	2.67419	2.67154	0	0	0	1.78244e-42	-9.66327	down	--	hypothetical protein F775_02993 [Aegilops tauschii]
TraesCS2A01G199600	27.1475	25.143	30.1634	0.075452	0.094314	0	1.23975e-119	-8.79941	down	Polygalacturonase inhibitor 1 (Precursor) GN=OJ1019_E02.4 OS=Oryza sativa subsp. japonica (Rice) PE=2 SV=1	FORL1 [Triticum aestivum]
TraesCS2A01G199700	15.8836	16.2883	14.6318	0	0.033819	0.072112	3.36108e-29	-7.64377	down	Calcium-dependent protein kinase 7 GN=CPK7 OS=Arabidopsis thaliana (Mouse-ear cress) PE=2 SV=1	calcium-dependent protein kinase [Triticum aestivum]
TraesCS2A01G199800	2.92934	3.2543	2.42616	0.106379	0.03908	0.039628	5.02773e-46	-5.41898	down	Protein TIC 20-I, chloroplastic {ECO:0000303|PubMed:23372012} (Precursor) OS=Arabidopsis thaliana (Mouse-ear cress) PE=1 SV=1	PREDICTED: protein TIC 20-I, chloroplastic-like [Brachypodium distachyon]
TraesCS2A01G199900	3.91731	4.76732	4.22755	0.006349	0	0	2.83494e-43	-9.06697	down	Zinc finger CCCH domain-containing protein 50 OS=Oryza sativa subsp. japonica (Rice) PE=2 SV=1	predicted protein [Hordeum vulgare subsp. vulgare]
TraesCS2A01G200000	10.5344	11.8456	9.22944	0	0	0.022039	4.83506e-57	-8.99575	down	HVA22-like protein k GN=HVA22K OS=Arabidopsis thaliana (Mouse-ear cress) PE=2 SV=1	hypothetical protein TRIUR3_18518 [Triticum urartu]
TraesCS2A01G200200	1.93193	1.58551	1.57273	0	0.015242	0	1.01791e-47	-7.60851	down	--	hypothetical protein F775_06473 [Aegilops tauschii]
TraesCS2A01G200300	0.744633	0.697865	0.422556	0	0.010961	0	8.74594e-19	-6.17692	down	Nodulation receptor kinase (Precursor) GN=NORK OS=Medicago truncatula (Barrel medic) PE=1 SV=2	PREDICTED: nodulation receptor kinase-like [Brachypodium distachyon]
TraesCS2A01G200500	5.22824	5.15689	4.66689	0	0	0	2.23334e-44	-9.8227	down	Exocyst complex component EXO84C GN=EXO84C OS=Arabidopsis thaliana (Mouse-ear cress) PE=2 SV=1	PREDICTED: exocyst complex component EXO84C [Brachypodium distachyon]
TraesCS2A01G200800	4.13831	6.03881	5.05066	0	0	0	1.46792e-19	-7.27765	down	--	predicted protein [Hordeum vulgare subsp. vulgare]
TraesCS2A01G200900	0.648135	1.41686	1.64046	0	0	0	3.73883e-23	-7.80961	down	Cytochrome c6, chloroplastic (Precursor) GN=petJ OS=Arabidopsis thaliana (Mouse-ear cress) PE=1 SV=1	Cytochrome c6, chloroplastic [Aegilops tauschii]
TraesCS2A01G201200	5.13914	5.21702	4.65882	0	0	0	2.53111e-43	-9.73707	down	Uncharacterized protein At4g19900 GN=At4g19900 OS=Arabidopsis thaliana (Mouse-ear cress) PE=2 SV=1	predicted protein [Hordeum vulgare subsp. vulgare]
TraesCS2A01G201600	3.69433	1.93567	3.56696	0	0	0	5.55174e-35	-9.00314	down	Probable arabinosyltransferase ARAD1 GN=ARAD1 OS=Arabidopsis thaliana (Mouse-ear cress) PE=1 SV=1	predicted protein [Hordeum vulgare subsp. vulgare]
TraesCS2A01G201800	27.175	21.3765	20.2874	0.649952	0.807361	0.784649	8.50893e-169	-5.12226	down	NAC transcription factor NAM-B2 GN=NAM-B2 OS=Triticum turgidum subsp. durum (Durum wheat) PE=2 SV=1	NAC transcription factor NAM-A2 [Triticum turgidum subsp. durum]
TraesCS2A01G201900	6.25881	7.3536	5.96633	0	0	0	6.55263e-39	-9.37516	down	Probable protein phosphatase 2C 64 OS=Oryza sativa subsp. japonica (Rice) PE=2 SV=2	predicted protein [Hordeum vulgare subsp. vulgare]
TraesCS2A01G202000	0.901406	1.21434	0.820365	0	0.034189	0	5.74961e-21	-5.88661	down	MATE efflux family protein 7 GN=F3L12.9 OS=Arabidopsis thaliana (Mouse-ear cress) PE=2 SV=1	predicted protein [Hordeum vulgare subsp. vulgare]
TraesCS2A01G202100	496.543	473.427	380.947	0.022304	0.071077	0	2.5484e-174	-12.6369	down	Putative cell wall protein (Precursor) GN=At2g20870 OS=Arabidopsis thaliana (Mouse-ear cress) PE=2 SV=2	predicted protein [Hordeum vulgare subsp. vulgare]
TraesCS2A01G202200	2.54464	3.06837	2.85504	0	0	0	5.39367e-27	-8.18613	down	Caffeoylshikimate esterase GN=CSE OS=Arabidopsis thaliana (Mouse-ear cress) PE=1 SV=1	predicted protein [Hordeum vulgare subsp. vulgare]
TraesCS2A01G202300	1.53442	1.18505	1.64436	0.041417	0	0.018322	2.02896e-27	-5.78183	down	Peptidyl-prolyl cis-trans isomerase CYP37, chloroplastic (Precursor) GN=CYP37 OS=Arabidopsis thaliana (Mouse-ear cress) PE=1 SV=3	Peptidyl-prolyl cis-trans isomerase CYP37, chloroplastic [Aegilops tauschii]
TraesCS2A01G202400	3.39924	4.12739	3.01852	0.149206	0.323737	0.205309	8.89648e-107	-4.68255	down	Kinesin-like protein FLA10 GN=FLA10 OS=Chlamydomonas reinhardtii (Chlamydomonas smithii) PE=1 SV=1	predicted protein [Hordeum vulgare subsp. vulgare]
TraesCS2A01G202600	7.77743	6.32047	7.32701	0	0.00793	0	7.6799e-66	-10.0234	down	Protein STRUBBELIG-RECEPTOR FAMILY 8 (Precursor) GN=SRF8 OS=Arabidopsis thaliana (Mouse-ear cress) PE=2 SV=1	predicted protein [Hordeum vulgare subsp. vulgare]
TraesCS2A01G202800	2.05619	2.16823	2.18587	0	0	0	1.54859e-25	-8.01478	down	--	hypothetical protein TRIUR3_26204 [Triticum urartu]
TraesCS2A01G202900	15.3765	13.3077	13.948	0.018578	0.107297	0.079719	2.80494e-39	-7.26634	down	Brefeldin A-inhibited guanine nucleotide-exchange protein 5 GN=F7K15_150 OS=Arabidopsis thaliana (Mouse-ear cress) PE=1 SV=2	PREDICTED: brefeldin A-inhibited guanine nucleotide-exchange protein 5 [Brachypodium distachyon]
TraesCS2A01G203100	15.2006	14.5503	13.0354	0.087257	0	0.058837	2.15692e-111	-7.83175	down	Secretory carrier-associated membrane protein 1 OS=Oryza sativa subsp. japonica (Rice) PE=2 SV=1	Secretory carrier-associated membrane protein 1 [Triticum urartu]
TraesCS2A01G203200	19.5153	14.857	22.1784	0	0.018956	0	6.59785e-77	-10.2613	down	Internal alternative NAD(P)H-ubiquinone oxidoreductase A1, mitochondrial (Precursor) GN=F10K1.11 OS=Arabidopsis thaliana (Mouse-ear cress) PE=2 SV=1	putative NADH dehydrogenase [Triticum urartu]
TraesCS2A01G203300	5.6615	4.83582	4.97171	0.145888	0.315012	0.248184	1.04772e-74	-4.40211	down	Phospholipid-transporting ATPase 2 GN=ALA2 OS=Arabidopsis thaliana (Mouse-ear cress) PE=1 SV=1	PREDICTED: phospholipid-transporting ATPase 2-like isoform X2 [Brachypodium distachyon]
TraesCS2A01G203400	19.2473	19.2731	17.9061	0	0	0.096359	1.18685e-35	-7.84787	down	--	predicted protein [Hordeum vulgare subsp. vulgare]
TraesCS2A01G203600	16.1171	16.5714	15.7871	0.632575	0.583321	0	0.00601804	-3.19182	down	Probable ADP-ribosylation factor GTPase-activating protein AGD5 GN=MDK4.13 OS=Arabidopsis thaliana (Mouse-ear cress) PE=1 SV=1	putative ADP-ribosylation factor GTPase-activating protein AGD5 [Triticum urartu]
TraesCS2A01G203700	1.68173	1.45617	1.30947	0	0.031573	0	0.00180444	-3.60045	down	Elongator complex protein 1 GN=MSH12.15 OS=Arabidopsis thaliana (Mouse-ear cress) PE=1 SV=1	Elongator complex protein 1 [Triticum urartu]
TraesCS2A01G203800	2.2925	2.14914	2.18583	0	0	0.02868	1.19943e-05	-4.62528	down	Protein FAR1-RELATED SEQUENCE 5 GN=FRS5 OS=Arabidopsis thaliana (Mouse-ear cress) PE=2 SV=1	predicted protein [Hordeum vulgare subsp. vulgare]
TraesCS2A01G204000	0.582068	0.844122	1.00219	0	0	0	3.23914e-20	-7.396	down	--	PREDICTED: uncharacterized protein LOC100846396 [Brachypodium distachyon]
TraesCS2A01G204200	3.58623	3.67103	3.69635	0.043918	0.158512	0.173731	2.33248e-52	-4.70798	down	--	unnamed protein product [Oryza sativa Japonica Group]
TraesCS2A01G204300	9.79779	7.84761	8.43687	0.005083	0.073459	0.065229	1.08933e-15	-5.97054	down	B3 domain-containing protein Os07g0563300 GN=OJ1720_F04.105 OS=Oryza sativa subsp. japonica (Rice) PE=3 SV=2	B3 domain-containing protein [Aegilops tauschii]
TraesCS2A01G204400	1.55938	1.69226	1.49913	0	0	0	1.08026e-25	-8.02946	down	Sphingosine kinase 1 GN=SPHK1 OS=Arabidopsis thaliana (Mouse-ear cress) PE=1 SV=1	predicted protein [Hordeum vulgare subsp. vulgare]
TraesCS2A01G204600	6.7447	7.69634	6.89135	0	0.039821	0	3.25729e-40	-7.78291	down	--	predicted protein [Hordeum vulgare subsp. vulgare]
TraesCS2A01G204700	10.0533	8.91538	8.61086	0	0	0	3.63757e-69	-11.5584	down	Myosin-2 GN=MDK4.10 OS=Arabidopsis thaliana (Mouse-ear cress) PE=2 SV=1	predicted protein [Hordeum vulgare subsp. vulgare]
TraesCS2A01G204800	249.371	252.379	272.05	3.1473	3.06317	2.47368	0	-6.65194	down	Chlorophyll a-b binding protein of LHCII type III, chloroplastic (Precursor) GN=LHBC OS=Hordeum vulgare (Barley) PE=2 SV=1	Chlorophyll a-b binding protein of LHCII type III, chloroplastic [Aegilops tauschii]
TraesCS2A01G204900	4.1363	3.57338	4.24076	0	0	0	3.78515e-35	-9.02177	down	Organic cation/carnitine transporter 2 GN=YUP8H12R.2 OS=Arabidopsis thaliana (Mouse-ear cress) PE=2 SV=1	Solute carrier family 22 member 3 [Aegilops tauschii]
TraesCS2A01G205300	7.31421	9.79899	6.24484	0.093571	0.095664	0.157308	1.38071e-61	-6.00906	down	Protein YLS9 GN=F11F19.11 OS=Arabidopsis thaliana (Mouse-ear cress) PE=2 SV=1	PREDICTED: protein YLS9-like [Brachypodium distachyon]
TraesCS2A01G205400	11.489	10.9947	8.74782	0	0	0	4.73783e-51	-10.3678	down	--	predicted protein [Hordeum vulgare subsp. vulgare]
TraesCS2A01G206000	12.1719	11.9728	10.2303	1.17611	0.343967	0.267589	6.03509e-27	-4.25911	down	Vesicle-associated protein 4-2 GN=PVA42 OS=Arabidopsis thaliana (Mouse-ear cress) PE=1 SV=1	PREDICTED: vesicle-associated protein 4-2-like [Brachypodium distachyon]
TraesCS2A01G206100	19.2039	19.0716	20.5887	2.31341	0.628788	2.04169	1.20677e-52	-3.56854	down	Protein THYLAKOID FORMATION1, chloroplastic (Precursor) GN=P0567H04.15-1 OS=Oryza sativa subsp. japonica (Rice) PE=2 SV=1	chloroplast inositol phosphatase-like protein [Triticum aestivum]
TraesCS2A01G206200	317.746	325.903	296.135	16.6628	22.2401	19.1516	1.21453e-219	-4.20825	down	Chlorophyll a-b binding protein CP29.2, chloroplastic (Precursor) GN=LHCB4.2 OS=Arabidopsis thaliana (Mouse-ear cress) PE=1 SV=1	Chlorophyll a-b binding protein CP29.2, chloroplastic [Aegilops tauschii]
TraesCS2A01G206600	2.18142	1.71532	2.35409	0	0.040306	0.07375	3.7684e-07	-4.58185	down	Uncharacterized aarF domain-containing protein kinase At1g79600, chloroplastic (Precursor) GN=At1g79600 OS=Arabidopsis thaliana (Mouse-ear cress) PE=2 SV=1	hypothetical protein F775_31952 [Aegilops tauschii]
TraesCS2A01G206800	9.40147	5.88055	8.765	0	0	0	9.85448e-29	-8.41726	down	Uncharacterized protein ycf19 GN=ycf19 OS=Cyanidium caldarium PE=3 SV=1	predicted protein [Hordeum vulgare subsp. vulgare]
TraesCS2A01G206900	0.957429	0.888869	0.863787	0.028418	0	0	2.1851e-17	-5.65093	down	--	WD repeat-containing protein 3-like protein [Triticum urartu]
TraesCS2A01G207000	7.56647	7.35747	7.98434	0	0	0	7.63082e-52	-10.3995	down	Lysine-specific demethylase JMJ25 GN=MLP3.6 OS=Arabidopsis thaliana (Mouse-ear cress) PE=1 SV=1	predicted protein [Hordeum vulgare subsp. vulgare]
TraesCS2A01G207500	6.98391	6.28834	4.5738	0	0	0	7.81815e-37	-9.21722	down	Equilibrative nucleotide transporter 3 OS=Arabidopsis thaliana (Mouse-ear cress) PE=1 SV=1	predicted protein [Hordeum vulgare subsp. vulgare]
TraesCS2A01G207600	9.51028	11.1274	9.64762	0	0	0	1.46315e-47	-10.0889	down	--	hypothetical protein F775_00006 [Aegilops tauschii]
TraesCS2A01G207700	2.51844	2.77297	2.67918	0	0	0	1.74756e-38	-9.3338	down	--	predicted protein [Hordeum vulgare subsp. vulgare]
TraesCS2A01G207900	52.6005	54.1658	58.2661	0	0.055402	0	3.27918e-106	-10.5185	down	Cytochrome b6-f complex iron-sulfur subunit, chloroplastic (Precursor) GN=petC OS=Triticum aestivum (Wheat) PE=2 SV=1	RecName: Full=Cytochrome b6-f complex iron-sulfur subunit, chloroplastic; AltName: Full=Plastohydroquinone:plastocyanin oxidoreductase iron-sulfur protein; AltName: Full=Rieske iron-sulfur protein; Short=ISP; Short=RISP; Flags: Precursor [Triticum aestivum]
TraesCS2A01G208000	5.4543	5.29094	5.94831	0	0	0	2.60789e-44	-9.81807	down	Protein-tyrosine-phosphatase PTP1 GN=PTP1 OS=Arabidopsis thaliana (Mouse-ear cress) PE=1 SV=1	predicted protein [Hordeum vulgare subsp. vulgare]
TraesCS2A01G208300	5.36967	5.41974	5.06192	0	0.015521	0	2.63267e-46	-8.21336	down	Cyclin-D6-1 GN=OSJNBa0058I18.18 OS=Oryza sativa subsp. japonica (Rice) PE=2 SV=1	Cyclin-D6-1 [Triticum urartu]
TraesCS2A01G208500	1.72462	1.33213	1.61354	0	0	0	8.42404e-22	-7.56031	down	--	hypothetical protein TRIUR3_27439 [Triticum urartu]
TraesCS2A01G208800	1.5194	1.34872	1.32784	0	0	0	1.76962e-23	-7.76368	down	--	hypothetical protein TRIUR3_14640 [Triticum urartu]
TraesCS2A01G209000	0.589224	0.746439	0.754443	0	0	0.005134	1.15112e-33	-6.96989	down	--	Vacuolar protein sorting-associated protein 2-like protein 3 [Triticum urartu]
TraesCS2A01G209100	21.2939	18.0989	18.9205	0.88753	1.34232	1.24842	4.39292e-129	-4.12168	down	Eukaryotic translation initiation factor 4G OS=Triticum aestivum (Wheat) PE=1 SV=1	Eukaryotic translation initiation factor 4G [Triticum urartu]
TraesCS2A01G209200	3.7446	3.63043	3.5455	0	0	0	7.41752e-24	-7.8067	down	--	PREDICTED: uncharacterized protein LOC104583785 [Brachypodium distachyon]
TraesCS2A01G209500	2.85549	3.63173	3.86684	0	0	0	2.59843e-25	-8.00783	down	Protein PLANT CADMIUM RESISTANCE 8 GN=PCR8 OS=Arabidopsis thaliana (Mouse-ear cress) PE=1 SV=2	hypothetical protein F775_26555 [Aegilops tauschii]
TraesCS2A01G209600	25.0579	34.085	26.4112	0	0	0	1.74883e-51	-10.4243	down	GPI-anchored protein LORELEI (Precursor) GN=LRE OS=Arabidopsis thaliana (Mouse-ear cress) PE=2 SV=1	hypothetical protein TRIUR3_12870 [Triticum urartu]
TraesCS2A01G209700	10.1557	10.0242	9.60051	0	0	0	1.08394e-35	-9.06293	down	--	hypothetical protein F775_08538 [Aegilops tauschii]
TraesCS2A01G209800	4.05901	5.08686	3.14175	0	0	0	1.66897e-26	-8.1649	down	Mitochondrial pyruvate carrier 4 {ECO:0000305} OS=Arabidopsis thaliana (Mouse-ear cress) PE=3 SV=1	PREDICTED: mitochondrial pyruvate carrier 2-like [Brachypodium distachyon]
TraesCS2A01G210100	0.427163	0.448681	0.457756	0	0	0	8.20117e-18	-7.00144	down	Probable mixed-linked glucan synthase 8 GN=OSJNBb0041B22.114 OS=Oryza sativa subsp. japonica (Rice) PE=2 SV=1	putative mixed-linked glucan synthase 8 [Triticum urartu]
TraesCS2A01G210600	1.82677	2.83026	2.48908	0	0	0	2.3926e-17	-6.95319	down	--	hypothetical protein TRIUR3_31562 [Triticum urartu]
TraesCS2A01G211100	9.05887	8.41348	8.53191	0	0	0.015082	1.7636e-54	-9.26466	down	--	hypothetical protein TRIUR3_25325 [Triticum urartu]
TraesCS2A01G211200	1.71327	1.05132	1.67253	0	0	0	1.39516e-27	-8.29885	down	G-type lectin S-receptor-like serine/threonine-protein kinase B120 (Precursor) GN=B120 OS=Arabidopsis thaliana (Mouse-ear cress) PE=2 SV=1	predicted protein [Hordeum vulgare subsp. vulgare]
TraesCS2A01G211700	10.3569	9.5127	9.11288	0.140373	0.129993	0.082813	1.09793e-214	-6.24184	down	--	hypothetical protein TRIUR3_15710 [Triticum urartu]
TraesCS2A01G212000	6.52258	5.8923	3.66696	0	0	0	1.12693e-30	-8.64591	down	Glycine-rich RNA-binding protein 3, mitochondrial (Precursor) GN=MAF19_30 OS=Arabidopsis thaliana (Mouse-ear cress) PE=2 SV=1	predicted protein [Hordeum vulgare subsp. vulgare]
TraesCS2A01G212100	33.068	33.8169	32.429	1.21162	1.5781	0.975812	2.14021e-171	-4.89121	down	Probable V-type proton ATPase subunit H OS=Oryza sativa subsp. japonica (Rice) PE=2 SV=1	predicted protein [Hordeum vulgare subsp. vulgare]
TraesCS2A01G212200	2.58497	3.20314	1.85136	0	0	0	4.62471e-23	-7.75955	down	Transcription factor ABORTED MICROSPORES GN=F12A24.9 OS=Arabidopsis thaliana (Mouse-ear cress) PE=1 SV=2	Transcription factor DYSFUNCTIONAL TAPETUM 1 [Aegilops tauschii]
TraesCS2A01G212300	2.68273	2.38171	1.88739	0	0.026249	0.076012	4.49706e-25	-5.59166	down	Pentatricopeptide repeat-containing protein At3g46870 GN=At3g46870 OS=Arabidopsis thaliana (Mouse-ear cress) PE=1 SV=1	predicted protein [Hordeum vulgare subsp. vulgare]
TraesCS2A01G212500	277.123	315.235	282.12	0	0.013643	0	1.21142e-180	-14.2257	down	--	hypothetical protein F775_00576 [Aegilops tauschii]
TraesCS2A01G213000	7.93551	7.69448	8.32251	0	0	0	1.0035e-46	-10.0231	down	Probable proteasome inhibitor GN=At3g53970 OS=Arabidopsis thaliana (Mouse-ear cress) PE=1 SV=1	hypothetical protein TRIUR3_21063 [Triticum urartu]
TraesCS2A01G213200	9.84022	7.60635	8.81742	0	0	0	8.94469e-39	-9.3623	down	--	predicted protein [Hordeum vulgare subsp. vulgare]
TraesCS2A01G213600	1.3183	1.60033	1.28225	0	0	0	1.27249e-22	-7.66043	down	Peptide chain release factor PrfB1, chloroplastic {ECO:0000303|PubMed:21771930} (Precursor) OS=Arabidopsis thaliana (Mouse-ear cress) PE=2 SV=1	predicted protein [Hordeum vulgare subsp. vulgare]
TraesCS2A01G213700	1.67706	1.76516	1.46942	0	0	0	6.38715e-27	-8.17809	down	BTB/POZ domain-containing protein At3g22104 GN=At3g22104 OS=Arabidopsis thaliana (Mouse-ear cress) PE=2 SV=1	PREDICTED: BTB/POZ domain-containing protein At3g22104 [Brachypodium distachyon]
TraesCS2A01G213900	11.868	13.0497	11.5415	0	0.107147	0.015367	5.98696e-11	-6.00441	down	--	predicted protein [Hordeum vulgare subsp. vulgare]
TraesCS2A01G214200	1.85173	2.09255	2.00237	0	0	0	2.63334e-18	-7.07564	down	Isopentenyl-diphosphate Delta-isomerase II, chloroplastic (Precursor) GN=IPP2 OS=Arabidopsis thaliana (Mouse-ear cress) PE=2 SV=1	predicted protein [Hordeum vulgare subsp. vulgare]
TraesCS2A01G214300	6.23042	5.99602	4.9983	0.01142	0	0	1.45172e-46	-7.51944	down	Pentatricopeptide repeat-containing protein At4g18975, chloroplastic (Precursor) GN=At4g18975 OS=Arabidopsis thaliana (Mouse-ear cress) PE=2 SV=2	predicted protein [Hordeum vulgare subsp. vulgare]
TraesCS2A01G214400	5.58573	5.44502	7.09987	0.021	0.00802	0.007455	7.25897e-65	-8.07258	down	Chitin-inducible gibberellin-responsive protein 1 GN=P0006G05.102 OS=Oryza sativa subsp. japonica (Rice) PE=2 SV=1	hypothetical protein TRIUR3_35245 [Triticum urartu]
TraesCS2A01G214500	0.927491	1.02096	1.21887	0	0	0	7.83743e-26	-8.06342	down	Formin-like protein 11 (Precursor) GN=FH11 OS=Oryza sativa subsp. japonica (Rice) PE=2 SV=1	Formin-like protein 11 [Triticum urartu]
TraesCS2A01G214600	93.7128	100.538	97.7706	0	0.339292	0.311317	1.25135e-20	-7.31494	down	Protein H2A.7 GN=H2A-10 OS=Triticum aestivum (Wheat) PE=2 SV=3	RecName: Full=Protein H2A.7; AltName: Full=wcH2A-10; AltName: Full=wcH2A-4 [Triticum aestivum]
TraesCS2A01G214700	80.5291	92.7669	70.9246	0.543453	0	0.467923	4.9333e-11	-5.96761	down	Histone H2A.4 GN=TH254 OS=Triticum aestivum (Wheat) PE=2 SV=3	Histone H2A.4 [Triticum urartu]
TraesCS2A01G214900	8.7838	3.3702	7.64637	0.016738	0	0	2.38412e-40	-8.38116	down	--	PREDICTED: 54S ribosomal protein L24, mitochondrial [Brachypodium distachyon]
TraesCS2A01G215000	259.006	261.851	253.672	0.256474	0.363443	0.039357	0	-10.1707	down	Oxygen-evolving enhancer protein 3-1, chloroplastic (Precursor) GN=PSBQ1 OS=Zea mays (Maize) PE=2 SV=1	predicted protein [Hordeum vulgare subsp. vulgare]
TraesCS2A01G215300	34.4644	33.9835	27.9555	0	0	0	3.62639e-73	-11.8135	down	Beta-amylase GN=BMY1 OS=Medicago sativa (Alfalfa) PE=2 SV=1	Beta-amylase [Triticum urartu]
TraesCS2A01G215600	13.5101	13.508	12.0422	0.217636	0	0.216384	1.92955e-07	-4.91182	down	Transcription factor ILR3 GN=K5F14.2 OS=Arabidopsis thaliana (Mouse-ear cress) PE=1 SV=1	predicted protein [Hordeum vulgare subsp. vulgare]
TraesCS2A01G215900	0.748001	0.578017	0.703185	0	0	0	1.72988e-19	-7.25029	down	Cysteine-rich receptor-like protein kinase 10 (Precursor) GN=F21P8.70 OS=Arabidopsis thaliana (Mouse-ear cress) PE=1 SV=3	PREDICTED: cysteine-rich receptor-like protein kinase 15 [Brachypodium distachyon]
TraesCS2A01G216100	4.40941	4.18563	3.37706	0	0	0	1.24836e-27	-8.26122	down	Probable mitochondrial import inner membrane translocase subunit TIM21 (Precursor) GN=TIM21 OS=Arabidopsis thaliana (Mouse-ear cress) PE=1 SV=1	hypothetical protein TRIUR3_31250 [Triticum urartu]
TraesCS2A01G216700	0.880539	0.633856	1.08208	0	0	0	2.57971e-22	-7.70367	down	Cysteine-rich receptor-like protein kinase 29 (Precursor) GN=CRK29 OS=Arabidopsis thaliana (Mouse-ear cress) PE=2 SV=1	predicted protein [Hordeum vulgare subsp. vulgare]
TraesCS2A01G217700	2.07754	2.23525	4.83888	0	0	0	1.48942e-27	-8.40518	down	Aspartic proteinase nepenthesin-1 (Precursor) GN=nep1 OS=Nepenthes gracilis (Slender pitcher plant) PE=1 SV=1	Aspartic proteinase nepenthesin-1 [Aegilops tauschii]
TraesCS2A01G218200	5.16902	4.51383	4.93669	0.026334	0.019841	0.04226	4.12276e-95	-7.22192	down	--	Pre-rRNA-processing protein esf1 [Triticum urartu]
TraesCS2A01G218300	12.9334	12.9975	13.0466	0.067203	0	0.093778	1.65789e-17	-6.64776	down	Lysophospholipid acyltransferase LPEAT1 GN=LPEAT1 OS=Arabidopsis thaliana (Mouse-ear cress) PE=1 SV=1	predicted protein [Hordeum vulgare subsp. vulgare]
TraesCS2A01G218500	1.73159	1.82595	1.64916	0	0	0	2.73963e-21	-7.48386	down	--	predicted protein [Hordeum vulgare subsp. vulgare]
TraesCS2A01G218600	6.38939	4.67148	6.31071	0	0	0	1.18416e-37	-9.27884	down	Probable pyruvate, phosphate dikinase regulatory protein, chloroplastic (Precursor) OS=Oryza sativa subsp. japonica (Rice) PE=2 SV=2	predicted protein [Hordeum vulgare subsp. vulgare]
TraesCS2A01G218800	3.48416	4.04377	3.28375	0.031258	0	0	4.63608e-21	-6.42685	down	--	hypothetical protein TRIUR3_21573 [Triticum urartu]
TraesCS2A01G218900	1.38477	1.05065	1.10373	0	0	0	5.72961e-28	-8.30434	down	--	Tyrosyl-DNA phosphodiesterase 1 [Triticum urartu]
TraesCS2A01G219300	1.61675	1.3727	1.96278	0	0	0	8.50845e-26	-8.07894	down	Ankyrin repeat-containing protein At2g01680 GN=At2g01680 OS=Arabidopsis thaliana (Mouse-ear cress) PE=2 SV=1	PREDICTED: ankyrin repeat-containing protein At3g12360-like [Setaria italica]
TraesCS2A01G219400	91.6669	108.306	92.1964	0.269218	0.085771	0.116084	3.36944e-272	-9.28302	down	--	TBC1 domain family member 15 [Aegilops tauschii]
TraesCS2A01G219600	83.2709	82.9126	60.9819	0	0	0	1.37031e-80	-12.271	down	WAT1-related protein At5g64700 GN=At5g64700 OS=Arabidopsis thaliana (Mouse-ear cress) PE=2 SV=1	predicted protein [Hordeum vulgare subsp. vulgare]
TraesCS2A01G220100	18.904	19.7518	19.5973	0.030508	0.018052	0.035476	1.58448e-142	-9.095	down	Protein disulfide isomerase-like 5-4 (Precursor) OS=Oryza sativa subsp. japonica (Rice) PE=2 SV=1	putative PDI-like protein [Triticum aestivum]
TraesCS2A01G220400	7.34113	7.35911	10.4118	0.281102	0.240373	0.388689	2.78377e-85	-4.86827	down	Glucose-6-phosphate/phosphate translocator 2, chloroplastic (Precursor) GN=GPT2 OS=Arabidopsis thaliana (Mouse-ear cress) PE=2 SV=2	Glucose-6-phosphate/phosphate translocator 2, chloroplastic [Aegilops tauschii]
TraesCS2A01G220600	14.2852	11.2548	19.1262	0	0	0	3.63424e-44	-9.89181	down	Ras-related protein RHN1 GN=RHN1 OS=Nicotiana plumbaginifolia (Leadwort-leaved tobacco) PE=2 SV=1	PREDICTED: septum-promoting GTP-binding protein 1 [Brachypodium distachyon]
TraesCS2A01G220700	1.28428	1.04941	1.32628	0	0	0	1.26745e-28	-8.35884	down	Glutamate receptor 3.4 (Precursor) GN=YUP8H12.19 OS=Arabidopsis thaliana (Mouse-ear cress) PE=2 SV=2	Glutamate receptor 3.4 [Triticum urartu]
TraesCS2A01G220800	41.0503	44.8759	37.3027	0	0	0	5.3705e-57	-10.7801	down	Succinate dehydrogenase cytochrome b560 subunit GN=SDH3 OS=Marchantia polymorpha (Liverwort) PE=3 SV=1	predicted protein [Hordeum vulgare subsp. vulgare]
TraesCS2A01G220900	5.37728	4.61643	4.72143	0.09186	0.142905	0.106686	1.68381e-171	-5.50478	down	Phospholipase A I GN=PLA1 OS=Arabidopsis thaliana (Mouse-ear cress) PE=2 SV=1	predicted protein [Hordeum vulgare subsp. vulgare]
TraesCS2A01G221000	7.47796	8.71842	9.66968	0.027076	0.067963	0.014018	5.31482e-62	-7.43457	down	Protein LHCP TRANSLOCATION DEFECT (Precursor) OS=Oryza sativa subsp. japonica (Rice) PE=2 SV=1	predicted protein [Hordeum vulgare subsp. vulgare]
TraesCS2A01G221200	3.00413	2.87966	2.78155	0.006057	0	0.012544	2.05728e-64	-7.86962	down	Microtubule-associated protein TORTIFOLIA1 GN=T24A18.10 OS=Arabidopsis thaliana (Mouse-ear cress) PE=1 SV=2	Microtubule-associated protein TORTIFOLIA1 [Aegilops tauschii]
TraesCS2A01G221300	5.03197	4.62991	5.56558	0.00404	0.032373	0.023854	5.53028e-63	-7.61042	down	ATP-dependent zinc metalloprotease FTSH 7, chloroplastic (Precursor) OS=Oryza sativa subsp. japonica (Rice) PE=3 SV=1	Mitochondrial chaperone BCS1 [Triticum urartu]
TraesCS2A01G221500	0.82768	0.807491	1.0272	0.004361	0	0	1.05777e-18	-6.58053	down	--	Putative mitochondrial chaperone bcs1 [Aegilops tauschii]
TraesCS2A01G221800	0.861692	0.646039	0.769297	0	0	0	3.28875e-19	-7.21208	down	Condensin-2 complex subunit H2 GN=MGL6.20 OS=Arabidopsis thaliana (Mouse-ear cress) PE=2 SV=1	hypothetical protein F775_15628 [Aegilops tauschii]
TraesCS2A01G221900	19.5038	18.086	16.5431	0.069525	0.206573	0.245722	1.60364e-155	-6.76725	down	Polyadenylate-binding protein RBP45 GN=RBP45 OS=Nicotiana plumbaginifolia (Leadwort-leaved tobacco) PE=1 SV=1	Uncharacterized RNA-binding protein C23E6.01c [Triticum urartu]
TraesCS2A01G222000	3.72474	4.08933	2.54111	0	0.026699	0	3.09098e-08	-5.46587	down	DEAD-box ATP-dependent RNA helicase 32 OS=Oryza sativa subsp. japonica (Rice) PE=2 SV=2	DEAD-box ATP-dependent RNA helicase 32 [Triticum urartu]
TraesCS2A01G222200	11.428	11.0075	17.307	0	0	0	6.92455e-33	-8.86511	down	--	predicted protein [Hordeum vulgare subsp. vulgare]
TraesCS2A01G222300	10.0646	10.1382	10.1524	0	0	0	2.49002e-48	-10.1311	down	Protein TRANSPARENT TESTA 12 GN=F17J16_80 OS=Arabidopsis thaliana (Mouse-ear cress) PE=2 SV=1	PREDICTED: protein TRANSPARENT TESTA 12-like [Brachypodium distachyon]
TraesCS2A01G222500	6.50163	3.99453	6.79078	0.098825	0.057643	0.03572	9.12356e-42	-6.06925	down	--	predicted protein [Hordeum vulgare subsp. vulgare]
TraesCS2A01G222600	34.8904	33.7034	35.317	0	0	0	7.2088e-52	-10.3976	down	Reactive Intermediate Deaminase A, chloroplastic {ECO:0000303|PubMed:25070638} (Precursor) OS=Arabidopsis thaliana (Mouse-ear cress) PE=1 SV=1	predicted protein [Hordeum vulgare subsp. vulgare]
TraesCS2A01G223000	4.77254	4.96584	7.29716	0.319893	0.013235	0.042407	1.37413e-06	-4.4541	down	Serine/arginine-rich splicing factor SR45a GN=F22G5.31 OS=Arabidopsis thaliana (Mouse-ear cress) PE=1 SV=1	Putative RNA-binding protein rbpE [Triticum urartu]
TraesCS2A01G223200	2.07705	1.82837	2.31732	0	0	0	2.51941e-35	-9.04208	down	tRNA wybutosine-synthesizing protein 2 homolog OS=Oryza sativa subsp. japonica (Rice) PE=2 SV=1	hypothetical protein F775_09211 [Aegilops tauschii]
TraesCS2A01G223300	0.764843	0.602438	0.648427	0.016855	0.008144	0	2.08917e-31	-5.82701	down	Pentatricopeptide repeat-containing protein At1g05670, mitochondrial (Precursor) GN=At1g05670 OS=Arabidopsis thaliana (Mouse-ear cress) PE=2 SV=1	hypothetical protein F775_10163 [Aegilops tauschii]
TraesCS2A01G223400	6.17518	4.92281	6.44397	0.088385	0	0	4.99706e-07	-5.10455	down	--	PREDICTED: trafficking protein particle complex subunit 5 [Brachypodium distachyon]
TraesCS2A01G223500	2.02226	2.02976	2.07111	0.035812	0.026319	0.009325	1.12529e-83	-5.94439	down	--	Exonuclease 3&apos;-5&apos; domain-containing protein 2 [Aegilops tauschii]
TraesCS2A01G223600	36.261	38.4468	39.4267	4.31909	1.95626	0.176644	0.000244532	-3.41993	down	Inceptin (Precursor) OS=Zea mays (Maize) PE=1 SV=1	ATP synthase subunit gamma, chloroplastic [Triticum urartu]
TraesCS2A01G223800	6.40036	6.94337	6.23996	0	0.02734	0	4.63415e-41	-7.85475	down	--	predicted protein [Hordeum vulgare subsp. vulgare]
TraesCS2A01G223900	2.76499	2.49777	1.71243	0	0	0	1.72846e-27	-8.27872	down	--	Serine/threonine-protein kinase RIO1 [Triticum urartu]
TraesCS2A01G224000	116.245	120.996	104.117	0	0	0	1.79219e-74	-11.8763	down	Autophagy-related protein 8A (Precursor) OS=Oryza sativa subsp. japonica (Rice) PE=3 SV=1	autophagy [Triticum aestivum]
TraesCS2A01G224100	4.1236	4.41462	4.46882	0.007078	0	0.020216	6.9737e-56	-8.05515	down	--	predicted protein [Hordeum vulgare subsp. vulgare]
TraesCS2A01G224300	1.13615	1.03655	0.842794	0	0.007885	0	4.66646e-29	-7.29568	down	Putative SWI/SNF-related matrix-associated actin-dependent regulator of chromatin subfamily A member 3-like 3 GN=At5g43530 OS=Arabidopsis thaliana (Mouse-ear cress) PE=3 SV=1	hypothetical protein F775_52308 [Aegilops tauschii]
TraesCS2A01G224500	2.39608	2.90497	2.22346	0	0	0	1.95242e-33	-8.86541	down	--	predicted protein [Hordeum vulgare subsp. vulgare]
TraesCS2A01G224600	10.3611	9.91651	7.91088	0	0.013697	0	7.8118e-63	-9.3581	down	L-ascorbate oxidase homolog (Precursor) OS=Nicotiana tabacum (Common tobacco) PE=1 SV=1	L-ascorbate oxidase-like protein [Aegilops tauschii]
TraesCS2A01G224900	4.82212	5.04089	5.83382	0	0	0	1.03057e-41	-9.61929	down	Glucan endo-1,3-beta-glucosidase 1 (Precursor) OS=Arabidopsis thaliana (Mouse-ear cress) PE=1 SV=3	PREDICTED: glucan endo-1,3-beta-glucosidase 1-like [Brachypodium distachyon]
TraesCS2A01G225100	1.48494	1.067	2.42217	0	0.019531	0	7.86262e-31	-7.21795	down	Methionine aminopeptidase 1B, chloroplastic {ECO:0000255|HAMAP-Rule:MF_03174} (Precursor) GN=MAP1B OS=Arabidopsis thaliana (Mouse-ear cress) PE=2 SV=2	predicted protein [Hordeum vulgare subsp. vulgare]
TraesCS2A01G225200	22.8297	13.2754	16.2729	0	0	0	2.20046e-61	-11.1723	down	Probable 5&apos;-adenylylsulfate reductase 1, chloroplastic (Precursor) GN=P0409B11.14 OS=Oryza sativa subsp. japonica (Rice) PE=2 SV=1	putative 5&apos;-adenylylsulfate reductase 1, chloroplastic [Triticum urartu]
TraesCS2A01G225600	4.27792	3.77127	3.60857	0.008779	0.082145	0.016252	4.90732e-90	-6.31201	down	Probable potassium transporter 14 GN=P0409B11.4 OS=Oryza sativa subsp. japonica (Rice) PE=2 SV=1	predicted protein [Hordeum vulgare subsp. vulgare]
TraesCS2A01G225900	2.94394	2.23447	2.94151	0	0.101765	0.008018	2.41359e-06	-4.55902	down	Dof zinc finger protein DOF1.4 GN=DOF1.4 OS=Arabidopsis thaliana (Mouse-ear cress) PE=2 SV=1	predicted protein [Hordeum vulgare subsp. vulgare]
TraesCS2A01G226000	1.09779	1.26473	1.02157	0	0	0	3.29667e-21	-7.4818	down	Mitotic checkpoint serine/threonine-protein kinase BUB1 GN=BUB1 OS=Arabidopsis thaliana (Mouse-ear cress) PE=1 SV=1	PREDICTED: mitotic checkpoint serine/threonine-protein kinase BUB1 isoform X1 [Brachypodium distachyon]
TraesCS2A01G226200	3.10348	3.54582	3.25344	0	0.006238	0.022494	2.43325e-47	-6.98157	down	--	hypothetical protein F775_28962 [Aegilops tauschii]
TraesCS2A01G226300	13.185	14.2524	13.2028	0	0	0.034106	2.18625e-71	-9.31455	down	Protein FLX-like 1 GN=MIE1.26 OS=Arabidopsis thaliana (Mouse-ear cress) PE=1 SV=1	predicted protein [Hordeum vulgare subsp. vulgare]
TraesCS2A01G226400	2.34307	3.69089	3.33236	0	0	0	3.86739e-25	-8.00713	down	RanBP2-type zinc finger protein At1g67325 GN=At1g67325 OS=Arabidopsis thaliana (Mouse-ear cress) PE=1 SV=1	RanBP2-type zinc finger protein [Aegilops tauschii]
TraesCS2A01G226500	0.422988	0.524101	0.319059	0	0.005112	0.005374	2.60324e-22	-5.94783	down	ATP-dependent DNA helicase SRS2-like protein At4g25120 GN=SRS2 OS=Arabidopsis thaliana (Mouse-ear cress) PE=1 SV=1	UvrD helicase [Hordeum vulgare subsp. vulgare]
TraesCS2A01G226700	6.1701	6.41108	6.03619	0.150259	0.152055	0.134958	6.90291e-131	-5.42102	down	--	predicted protein [Hordeum vulgare subsp. vulgare]
TraesCS2A01G226800	3.39595	2.47485	2.9644	0	0	0.007563	1.20143e-30	-7.93291	down	Peptidyl-prolyl cis-trans isomerase FKBP20-2, chloroplastic (Precursor) GN=FKBP20-2 OS=Arabidopsis thaliana (Mouse-ear cress) PE=1 SV=1	PREDICTED: peptidyl-prolyl cis-trans isomerase FKBP20-2, chloroplastic isoform X1 [Brachypodium distachyon]
TraesCS2A01G227000	8.25876	9.01277	8.59235	0.270621	0.485794	0.651525	2.75557e-66	-4.88273	down	--	predicted protein [Hordeum vulgare subsp. vulgare]
TraesCS2A01G227200	3.69733	3.67372	2.48709	0.197403	0.019768	0.061627	7.10735e-09	-4.35927	down	Dynein assembly factor with WDR repeat domains 1 GN=DAW1 OS=Chlamydomonas reinhardtii (Chlamydomonas smithii) PE=1 SV=1	predicted protein [Hordeum vulgare subsp. vulgare]
TraesCS2A01G227300	35.9779	45.2605	40.2643	0	0	0	1.07123e-49	-10.265	down	Actin-depolymerizing factor 9 GN=OJ1136_F08.120 OS=Oryza sativa subsp. japonica (Rice) PE=2 SV=1	predicted protein [Hordeum vulgare subsp. vulgare]
TraesCS2A01G227400	6.58478	7.12764	7.33917	0.015998	0	0	7.48644e-53	-9.18131	down	E3 ubiquitin protein ligase RIN2 GN=F24A6.70 OS=Arabidopsis thaliana (Mouse-ear cress) PE=1 SV=1	predicted protein [Hordeum vulgare subsp. vulgare]
TraesCS2A01G227500	81.1667	83.3071	79.6507	1.6255	1.09914	1.25952	0	-6.09104	down	60S ribosomal protein L15-2 GN=RPL15B OS=Arabidopsis thaliana (Mouse-ear cress) PE=2 SV=1	predicted protein [Hordeum vulgare subsp. vulgare]
TraesCS2A01G227700	1.21014	1.83078	1.4447	0	0	0	1.98423e-22	-7.67461	down	--	hypothetical protein TRIUR3_07330 [Triticum urartu]
TraesCS2A01G227900	6.05646	4.86222	5.17488	0.177424	0.380432	0.259881	9.9263e-72	-4.43217	down	Protein CHROMATIN REMODELING 4 {ECO:0000303|PubMed:16547115} OS=Arabidopsis thaliana (Mouse-ear cress) PE=2 SV=1	CHD3-type chromatin-remodeling factor PICKLE [Aegilops tauschii]
TraesCS2A01G228000	10.8067	9.34424	10.1934	1.02606	0.214663	0.303719	1.23579e-48	-5.18467	down	Regulator of nonsense transcripts 1 homolog GN=MQD22.15 OS=Arabidopsis thaliana (Mouse-ear cress) PE=1 SV=2	PREDICTED: regulator of nonsense transcripts 1 homolog [Brachypodium distachyon]
TraesCS2A01G228300	21.4599	21.208	19.9482	0.414307	0.890784	0.645196	1.30683e-96	-4.96352	down	COP9 signalosome complex subunit 7 OS=Arabidopsis thaliana (Mouse-ear cress) PE=1 SV=1	PREDICTED: COP9 signalosome complex subunit 7 isoform X1 [Brachypodium distachyon]
TraesCS2A01G228400	1.51294	1.94216	1.65875	0	0	0	3.55337e-29	-8.4283	down	--	hypothetical protein TRIUR3_30706 [Triticum urartu]
TraesCS2A01G228600	4.95076	5.16386	5.35691	0.20362	0.034326	0.055795	1.34885e-38	-5.51127	down	Polyadenylate-binding protein 3 GN=PAB3 OS=Arabidopsis thaliana (Mouse-ear cress) PE=2 SV=1	Heterogeneous nuclear ribonucleoprotein Q [Triticum urartu]
TraesCS2A01G229000	1.31162	1.00419	1.17381	0.370226	0.235686	0.4324	2.23063e-33	-2.69484	down	28 kDa ribonucleoprotein, chloroplastic (Precursor) OS=Nicotiana sylvestris (Wood tobacco) PE=1 SV=1	hypothetical protein SORBIDRAFT_02g031040 [Sorghum bicolor]
TraesCS2A01G229100	3.23371	3.3354	4.13221	0	0	0	1.12267e-24	-7.92587	down	Probable ADP-ribosylation factor GTPase-activating protein AGD11 GN=AGD11 OS=Arabidopsis thaliana (Mouse-ear cress) PE=2 SV=1	putative ADP-ribosylation factor GTPase-activating protein AGD11 [Triticum urartu]
TraesCS2A01G229300	5.30823	5.39441	5.43479	0	0.014017	0	5.30722e-51	-9.02696	down	Probable LRR receptor-like serine/threonine-protein kinase At1g51820 (Precursor) GN=At1g51820 OS=Arabidopsis thaliana (Mouse-ear cress) PE=2 SV=1	PREDICTED: probable LRR receptor-like serine/threonine-protein kinase At1g51820 isoform X1 [Brachypodium distachyon]
TraesCS2A01G229400	7.60509	6.62127	7.03067	0.178038	0.342355	0.182731	9.34365e-88	-4.76396	down	Calmodulin-binding transcription activator 5 OS=Arabidopsis thaliana (Mouse-ear cress) PE=2 SV=2	predicted protein [Hordeum vulgare subsp. vulgare]
TraesCS2A01G229600	6.13469	5.97574	5.2715	0	0	0	4.24919e-45	-9.88634	down	Probable E3 ubiquitin-protein ligase LUL4 GN=F28L1.8 OS=Arabidopsis thaliana (Mouse-ear cress) PE=2 SV=1	PREDICTED: uncharacterized protein LOC100846253 isoform X2 [Brachypodium distachyon]
TraesCS2A01G230000	1.43819	1.5214	1.83866	0	0	0	2.50409e-21	-7.4992	down	Protein trichome birefringence-like 13 GN=TBL13 OS=Arabidopsis thaliana (Mouse-ear cress) PE=2 SV=1	predicted protein [Hordeum vulgare subsp. vulgare]
TraesCS2A01G230100	6.71828	7.22715	6.84161	0.01134	0.00542	0.013806	1.75276e-176	-9.27207	down	LRR receptor-like serine/threonine-protein kinase GSO1 (Precursor) GN=GSO1 OS=Arabidopsis thaliana (Mouse-ear cress) PE=2 SV=1	predicted protein [Hordeum vulgare subsp. vulgare]
TraesCS2A01G230200	62.198	77.7711	71.4519	2.56656	1.891	1.64034	2.2221e-192	-6.13727	down	--	hypothetical protein F775_43892 [Aegilops tauschii]
TraesCS2A01G230700	5.35682	5.26101	4.90714	0.059931	0.099139	0.095536	1.08363e-148	-5.82041	down	Peptide-N(4)-(N-acetyl-beta-glucosaminyl)asparagine amidase GN=PNG1 OS=Arabidopsis thaliana (Mouse-ear cress) PE=2 SV=1	predicted protein [Hordeum vulgare subsp. vulgare]
TraesCS2A01G230800	1.16017	1.11919	1.04581	0.02914	0	0.019571	2.71722e-17	-5.33145	down	--	hypothetical protein F775_00031 [Aegilops tauschii]
TraesCS2A01G231000	4.6347	4.12921	4.14537	0	0.031861	0	1.60634e-56	-8.4575	down	Uncharacterized Rho GTPase-activating protein At5g61530 GN=At5g61530 OS=Arabidopsis thaliana (Mouse-ear cress) PE=1 SV=2	predicted protein [Hordeum vulgare subsp. vulgare]
TraesCS2A01G231300	3.98187	4.67096	2.92051	0.278561	0.24015	0.185995	2.69242e-50	-3.94647	down	Spindle and kinetochore-associated protein 1 homolog OS=Oryza sativa subsp. japonica (Rice) PE=2 SV=1	PREDICTED: spindle and kinetochore-associated protein 1 homolog [Brachypodium distachyon]
TraesCS2A01G231500	5.50771	5.87189	5.7808	0.556017	0.608849	0.120037	6.30129e-15	-3.49441	down	Asparagine--tRNA ligase, chloroplastic/mitochondrial (Precursor) GN=dl4685w OS=Arabidopsis thaliana (Mouse-ear cress) PE=2 SV=3	predicted protein [Hordeum vulgare subsp. vulgare]
TraesCS2A01G231600	2.80806	3.61525	2.59932	0	0	0.006614	2.21769e-38	-8.16122	down	WAT1-related protein At5g47470 GN=At5g47470 OS=Arabidopsis thaliana (Mouse-ear cress) PE=3 SV=1	PREDICTED: WAT1-related protein At5g47470-like isoform X2 [Brachypodium distachyon]
TraesCS2A01G231900	5.4433	5.16191	6.02409	0	0	0	2.9262e-42	-9.65543	down	C2 and GRAM domain-containing protein At5g50170 GN=At5g50170 OS=Arabidopsis thaliana (Mouse-ear cress) PE=2 SV=1	PREDICTED: uncharacterized membrane protein C20F10.07 [Brachypodium distachyon]
TraesCS2A01G232200	8.14646	8.52196	7.717	0.01281	0.0104	0.067368	3.47959e-110	-7.69915	down	RING-H2 finger protein ATL34 (Precursor) GN=ATL34 OS=Arabidopsis thaliana (Mouse-ear cress) PE=2 SV=1	PREDICTED: uncharacterized protein LOC100834287 isoform X1 [Brachypodium distachyon]
TraesCS2A01G232400	1.8723	3.11794	3.00455	0	0	0	1.36905e-18	-7.16447	down	Squamosa promoter-binding-like protein 13 GN=P0430F03.47 OS=Oryza sativa subsp. japonica (Rice) PE=2 SV=1	Squamosa promoter-binding-like protein 13 [Triticum urartu]
TraesCS2A01G232800	11.0624	9.871	10.1436	0.016904	0.04636	0.283342	3.09133e-63	-6.25111	down	--	hypothetical protein F775_32065 [Aegilops tauschii]
TraesCS2A01G232900	10.4651	10.5914	7.8438	0	0	0	8.89244e-57	-10.7937	down	Filament-like plant protein 3 GN=FPP3 OS=Arabidopsis thaliana (Mouse-ear cress) PE=2 SV=2	hypothetical protein TRIUR3_14045 [Triticum urartu]
TraesCS2A01G233000	8.90272	7.56549	7.23083	0	0.020616	0.040576	1.04498e-82	-8.28694	down	--	hypothetical protein F775_29855 [Aegilops tauschii]
TraesCS2A01G233100	4.98172	4.69781	6.28275	0.111646	0.01767	0.016425	2.223e-55	-6.14755	down	Probable protein phosphatase 2C 62 OS=Oryza sativa subsp. japonica (Rice) PE=2 SV=1	Putative protein phosphatase 2C 62 [Aegilops tauschii]
TraesCS2A01G233300	2.03781	2.38802	2.63683	0.010039	0.050349	0.017031	1.91376e-56	-6.28386	down	Protein TPX2 GN=TPX2 OS=Arabidopsis thaliana (Mouse-ear cress) PE=1 SV=1	hypothetical protein F775_32886 [Aegilops tauschii]
TraesCS2A01G233400	4.94209	4.62129	4.70548	0.015858	0.058905	0.065762	1.01598e-113	-6.66252	down	Mitogen-activated protein kinase kinase kinase YODA GN=YDA OS=Arabidopsis thaliana (Mouse-ear cress) PE=1 SV=1	predicted protein [Hordeum vulgare subsp. vulgare]
TraesCS2A01G233500	1.26596	1.14607	1.00584	0.011648	0	0	3.42942e-27	-6.69625	down	Serine/threonine-protein phosphatase 7 long form homolog GN=At1g48120 OS=Arabidopsis thaliana (Mouse-ear cress) PE=2 SV=1	hypothetical protein F775_06327 [Aegilops tauschii]
TraesCS2A01G233600	1.32772	1.63663	1.28998	0.119131	0.014176	0.198937	7.10587e-11	-3.56992	down	Serine/threonine-protein phosphatase 7 long form homolog GN=At1g48120 OS=Arabidopsis thaliana (Mouse-ear cress) PE=2 SV=1	predicted protein [Hordeum vulgare subsp. vulgare]
TraesCS2A01G233700	4.47312	4.57639	4.13014	0.059997	0.223078	0.089452	1.35562e-47	-5.19118	down	Probable pre-mRNA-splicing factor ATP-dependent RNA helicase GN=At3g26560 OS=Arabidopsis thaliana (Mouse-ear cress) PE=1 SV=2	Pre-mRNA-splicing factor ATP-dependent RNA helicase PRP16 [Triticum urartu]
TraesCS2A01G233800	3.76111	3.29213	3.39583	0.297829	0.397641	0.553382	9.85793e-73	-3.12631	down	Nucleobase-ascorbate transporter 11 GN=NAT11 OS=Arabidopsis thaliana (Mouse-ear cress) PE=2 SV=1	predicted protein [Hordeum vulgare subsp. vulgare]
TraesCS2A01G234200	61.0493	64.0188	61.9808	0.124328	0.076127	0.052591	2.21079e-297	-9.18172	down	NADH dehydrogenase [ubiquinone] flavoprotein 1, mitochondrial (Precursor) GN=At5g08530 OS=Arabidopsis thaliana (Mouse-ear cress) PE=1 SV=1	predicted protein [Hordeum vulgare subsp. vulgare]
TraesCS2A01G234300	7.53731	8.52144	9.33498	0	0	0.013961	1.46845e-59	-9.11179	down	--	predicted protein [Hordeum vulgare subsp. vulgare]
TraesCS2A01G234400	10.4789	9.99676	9.26817	0.026611	0.009423	0	7.80657e-106	-8.85089	down	--	PREDICTED: uncharacterized protein LOC100843696 [Brachypodium distachyon]
TraesCS2A01G234700	10.9447	10.2907	10.8148	0.175196	0	0.090299	2.87024e-06	-4.72437	down	Protein GRIP GN=GRIP OS=Arabidopsis thaliana (Mouse-ear cress) PE=1 SV=2	PREDICTED: protein GRIP [Brachypodium distachyon]
TraesCS2A01G234800	14.841	14.1009	14.4304	1.6204	0.598838	0.672106	1.75145e-32	-3.99299	down	--	PREDICTED: UPF0613 protein PB24D3.06c [Brachypodium distachyon]
TraesCS2A01G235000	3.09199	2.31035	4.36771	0	0.031295	0	1.03501e-21	-6.37304	down	Protein CURVATURE THYLAKOID 1B, chloroplastic (Precursor) GN=F19D11.10 OS=Arabidopsis thaliana (Mouse-ear cress) PE=1 SV=2	hypothetical protein TRIUR3_30562 [Triticum urartu]
TraesCS2A01G235400	2.93094	3.075	3.15292	0.708033	0.694588	0.636284	2.38683e-48	-2.3595	down	Histone-lysine N-methyltransferase family member SUVH2 GN=F4P9.6 OS=Arabidopsis thaliana (Mouse-ear cress) PE=1 SV=1	predicted protein [Hordeum vulgare subsp. vulgare]
TraesCS2A01G235500	7.36336	8.38538	7.05243	0.195912	0.449907	1.1317	7.23181e-41	-4.25587	down	ADP-ribosylation factor 1 GN=ARF1 OS=Arabidopsis thaliana (Mouse-ear cress) PE=1 SV=2	PREDICTED: ADP-ribosylation factor 1 [Brachypodium distachyon]
TraesCS2A01G235700	7.05512	5.96789	6.49767	0	0	0	1.58661e-60	-11.0111	down	--	E3 ubiquitin-protein ligase TRIM33 [Triticum urartu]
TraesCS2A01G235900	3.74007	3.29539	3.42491	0.0458	0.035164	0	2.02156e-08	-5.25173	down	DNA (cytosine-5)-methyltransferase 1B GN=OJ1506_G02.17 OS=Oryza sativa subsp. japonica (Rice) PE=2 SV=1	DNA (cytosine-5)-methyltransferase 1B [Triticum urartu]
TraesCS2A01G236200	11.3674	13.2721	11.2273	0.271456	0.319762	0.250829	5.44712e-156	-5.54294	down	Probable (S)-ureidoglycine aminohydrolase (Precursor) OS=Oryza sativa subsp. japonica (Rice) PE=1 SV=1	hypothetical protein TRIUR3_31170 [Triticum urartu]
TraesCS2A01G236300	6.96208	7.56283	7.14524	0.242963	0	0.012127	0.00243839	-3.49577	down	Ultraviolet-B receptor UVR8 GN=UVR8 OS=Arabidopsis thaliana (Mouse-ear cress) PE=1 SV=1	PREDICTED: ultraviolet-B receptor UVR8 [Brachypodium distachyon]
TraesCS2A01G236400	0.893633	1.28301	1.07887	0	0	0	2.11841e-21	-7.52468	down	Protein FAR1-RELATED SEQUENCE 12 GN=FRS12 OS=Arabidopsis thaliana (Mouse-ear cress) PE=2 SV=1	hypothetical protein F775_25256 [Aegilops tauschii]
TraesCS2A01G236600	62.6425	65.8272	61.8893	2.97424	3.15268	2.82399	2.44895e-304	-4.61208	down	Ras-related protein RABH1b GN=F16B22.10 OS=Arabidopsis thaliana (Mouse-ear cress) PE=1 SV=1	Os07g0496000 [Oryza sativa Japonica Group]
TraesCS2A01G236900	0.730271	0.278232	1.43463	0	0	0	9.45298e-22	-7.8129	down	Protein FAR1-RELATED SEQUENCE 5 GN=FRS5 OS=Arabidopsis thaliana (Mouse-ear cress) PE=2 SV=1	PREDICTED: protein FAR1-RELATED SEQUENCE 5-like [Brachypodium distachyon]
TraesCS2A01G237000	24.0205	23.8654	24.3195	1.63986	1.79626	1.56926	0	-4.06882	down	NAD-dependent malic enzyme 1, mitochondrial (Precursor) GN=NAD-ME1 OS=Arabidopsis thaliana (Mouse-ear cress) PE=1 SV=1	predicted protein [Hordeum vulgare subsp. vulgare]
TraesCS2A01G237100	1.61977	1.45651	1.11338	0	0	0	2.26671e-31	-8.68529	down	Probable nucleolar protein 5-1 OS=Arabidopsis thaliana (Mouse-ear cress) PE=2 SV=2	hypothetical protein F775_24701 [Aegilops tauschii]
TraesCS2A01G237200	8.3631	8.75949	8.9848	0	0.110482	0	0.00204158	-3.58514	down	Protein LOW PSII ACCUMULATION 1, chloroplastic (Precursor) GN=LPA1 OS=Arabidopsis thaliana (Mouse-ear cress) PE=1 SV=1	tetratricopeptide repeat containing protein [Triticum monococcum]
TraesCS2A01G237300	3.08531	2.10199	2.63593	0.133935	0.093659	0.340292	6.43894e-67	-4.37365	down	--	PREDICTED: endoplasmic reticulum metallopeptidase 1 isoform X1 [Brachypodium distachyon]
TraesCS2A01G237400	10.8082	10.8589	10.1462	0.782691	0.999627	1.03724	6.1883e-116	-3.69238	down	Glycine-rich RNA-binding protein RZ1C {ECO:0000305} OS=Arabidopsis thaliana (Mouse-ear cress) PE=1 SV=1	Glycine-rich RNA-binding protein 2 [Triticum urartu]
TraesCS2A01G237500	4.93399	5.01454	4.86932	0.060878	0.024454	0.031259	1.66574e-93	-6.7856	down	--	predicted protein [Hordeum vulgare subsp. vulgare]
TraesCS2A01G237600	31.295	34.5765	30.1051	0.178929	0	0.266996	4.85754e-11	-5.9125	down	--	PREDICTED: uncharacterized protein LOC100836843 [Brachypodium distachyon]
TraesCS2A01G237700	5.48163	5.10405	5.29707	0.162436	0.031926	0	8.52155e-21	-6.44744	down	Peptidyl-prolyl cis-trans isomerase CYP63 GN=MAA21.30 OS=Arabidopsis thaliana (Mouse-ear cress) PE=1 SV=1	cyclophilin-like protein [Triticum aestivum]
TraesCS2A01G237800	10.4514	10.3666	9.83529	0.395529	0.423862	0.282206	7.17316e-140	-4.68662	down	BTB/POZ and MATH domain-containing protein 4 GN=BPM4 OS=Arabidopsis thaliana (Mouse-ear cress) PE=1 SV=1	speckle-type POZ, partial [Triticum aestivum]
TraesCS2A01G237900	14.9494	14.3828	12.6696	0.051727	0.436525	0.189039	8.48262e-13	-4.84598	down	--	predicted protein [Hordeum vulgare subsp. vulgare]
TraesCS2A01G238400	16.4417	15.2795	13.6558	0.332223	0	0.199664	5.31379e-05	-4.25668	down	Zeta-carotene desaturase, chloroplastic/chromoplastic (Precursor) GN=ZDS1 OS=Zea mays (Maize) PE=2 SV=1	zeta-carotene desaturase [Triticum aestivum]
TraesCS2A01G238600	10.1443	9.49366	7.7951	0	0.007176	0	4.79193e-66	-10.0644	down	Casein kinase I isoform delta-like GN=At4g26100 OS=Arabidopsis thaliana (Mouse-ear cress) PE=2 SV=2	PREDICTED: uncharacterized protein LOC100821235 [Brachypodium distachyon]
TraesCS2A01G238700	5.35359	5.76961	5.62217	0.021708	0.013973	0.008058	7.14505e-67	-7.54977	down	Growth-regulating factor 11 OS=Oryza sativa subsp. japonica (Rice) PE=2 SV=1	hypothetical protein F775_29935 [Aegilops tauschii]
TraesCS2A01G238800	1.42878	2.72687	2.14775	0.010003	0	0.012028	2.01558e-50	-7.17156	down	--	PREDICTED: uncharacterized protein LOC100832287 [Brachypodium distachyon]
TraesCS2A01G238900	11.3286	11.6034	10.3751	0.321639	0.403199	0.510007	1.79385e-187	-4.92295	down	C2 and GRAM domain-containing protein At1g03370 GN=At1g03370 OS=Arabidopsis thaliana (Mouse-ear cress) PE=2 SV=4	predicted protein [Hordeum vulgare subsp. vulgare]
TraesCS2A01G239000	1.52074	1.41716	1.79227	0.02224	0	0.003514	1.66068e-10	-5.7028	down	Mediator of RNA polymerase II transcription subunit 14 GN=F7O18.23 OS=Arabidopsis thaliana (Mouse-ear cress) PE=1 SV=1	PREDICTED: mediator of RNA polymerase II transcription subunit 14-like [Oryza brachyantha]
TraesCS2A01G239200	3.882	3.30917	4.25426	0.007692	0.016479	0.023702	2.20351e-82	-7.60835	down	Probable polyribonucleotide nucleotidyltransferase 1, chloroplastic (Precursor) GN=OSJNBa0050F10.4 OS=Oryza sativa subsp. japonica (Rice) PE=2 SV=1	predicted protein [Hordeum vulgare subsp. vulgare]
TraesCS2A01G239500	1.59789	1.32614	1.70526	0	0	0	6.79845e-28	-8.29302	down	Pentatricopeptide repeat-containing protein At2g41720 GN=EMB2654 OS=Arabidopsis thaliana (Mouse-ear cress) PE=2 SV=1	predicted protein [Hordeum vulgare subsp. vulgare]
TraesCS2A01G239900	4.49257	4.02058	4.57532	0	0	0	3.17381e-38	-9.29476	down	Calcium-dependent protein kinase 16 GN=CPK16 OS=Arabidopsis thaliana (Mouse-ear cress) PE=3 SV=1	calcium-dependent protein kinase [Triticum aestivum]
TraesCS2A01G240000	8.00335	6.96658	8.27893	0.05512	0.00687	0.035227	9.06235e-96	-7.51449	down	AT-rich interactive domain-containing protein 3 GN=ARID3 OS=Arabidopsis thaliana (Mouse-ear cress) PE=1 SV=1	PREDICTED: AT-rich interactive domain-containing protein 6-like [Brachypodium distachyon]
TraesCS2A01G240200	25.422	25.0689	28.8622	2.30452	2.17658	2.05245	9.61821e-197	-3.75025	down	Pyruvate kinase isozyme A, chloroplastic (Precursor) OS=Ricinus communis (Castor bean) PE=1 SV=1	predicted protein [Hordeum vulgare subsp. vulgare]
TraesCS2A01G240300	18.0786	21.203	18.5198	0	0	0	1.00338e-56	-10.7633	down	CRIB domain-containing protein RIC7 GN=RIC7 OS=Arabidopsis thaliana (Mouse-ear cress) PE=1 SV=1	hypothetical protein TRIUR3_35286 [Triticum urartu]
TraesCS2A01G242700	1.3262	1.09958	1.47772	0	0	0	3.0221e-21	-7.4847	down	--	unnamed protein product [Triticum aestivum]
TraesCS2A01G242900	4.845	4.31403	4.46339	0.147893	0.149586	0.051723	1.98769e-65	-5.23283	down	--	predicted protein [Hordeum vulgare subsp. vulgare]
TraesCS2A01G243200	157.904	170.236	162.784	14.3124	7.91959	7.05776	5.09645e-60	-4.20449	down	Thioredoxin H-type GN=TRXH OS=Oryza sativa subsp. indica (Rice) PE=1 SV=1	thioredoxin H [Triticum aestivum]
TraesCS2A01G243300	9.55957	8.13131	8.98151	1.12225	0.799305	1.02925	7.89201e-154	-3.35673	down	DNA damage-binding protein 1a GN=DDB1A OS=Arabidopsis thaliana (Mouse-ear cress) PE=1 SV=1	predicted protein [Hordeum vulgare subsp. vulgare]
TraesCS2A01G243400	2.86921	2.43592	2.85064	0.09692	0.07199	0.064348	4.18538e-102	-5.10523	down	Probable inactive leucine-rich repeat receptor-like protein kinase At3g03770 (Precursor) GN=At3g03770 OS=Arabidopsis thaliana (Mouse-ear cress) PE=2 SV=1	PREDICTED: probable inactive leucine-rich repeat receptor-like protein kinase At3g03770 [Brachypodium distachyon]
TraesCS2A01G243500	13.514	14.7806	14.9852	0.673292	0.546867	0.53757	6.44935e-129	-4.77132	down	--	predicted protein [Hordeum vulgare subsp. vulgare]
TraesCS2A01G243600	0.804296	0.850162	1.04492	0.07076	0.06277	0.010117	9.56041e-13	-3.46338	down	--	hypothetical protein TRIUR3_21156 [Triticum urartu]
TraesCS2A01G244000	11.0004	11.4853	11.2445	0.936898	0.977672	0.61547	4.15884e-80	-3.90108	down	THO complex subunit 4B GN=ALY2 OS=Arabidopsis thaliana (Mouse-ear cress) PE=1 SV=1	PREDICTED: THO complex subunit 4A-like [Brachypodium distachyon]
TraesCS2A01G244100	8.28018	8.83018	7.66717	2.14402	1.53053	1.51359	6.81839e-43	-2.44501	down	Exocyst complex component EXO84B GN=EXO84B OS=Arabidopsis thaliana (Mouse-ear cress) PE=1 SV=1	hypothetical protein F775_52522 [Aegilops tauschii]
TraesCS2A01G244200	8.34707	9.63781	11.9221	1.08302	0.751569	0.590171	5.44275e-51	-3.76887	down	Serine/threonine-protein kinase AFC2 GN=AFC2 OS=Arabidopsis thaliana (Mouse-ear cress) PE=1 SV=1	Serine/threonine-protein kinase SRPK1 [Triticum urartu]
TraesCS2A01G244300	0.930948	0.792599	0.839583	0.006617	0	0.014532	1.85591e-20	-5.57331	down	--	hypothetical protein TRIUR3_30221 [Triticum urartu]
TraesCS2A01G244500	7.96885	8.06277	7.74658	1.73456	1.60523	1.43079	1.16681e-71	-2.51411	down	--	predicted protein [Hordeum vulgare subsp. vulgare]
TraesCS2A01G244700	1.735	1.71852	1.91002	0.480903	0.121055	0.384817	1.4532e-21	-2.84765	down	--	predicted protein [Hordeum vulgare subsp. vulgare]
TraesCS2A01G244800	7.35112	6.93435	6.3218	0.768243	0.415562	0.243496	3.75026e-31	-3.93781	down	Synaptotagmin-5 GN=T25N20.15 OS=Arabidopsis thaliana (Mouse-ear cress) PE=2 SV=1	predicted protein [Hordeum vulgare subsp. vulgare]
TraesCS2A01G245100	18.4843	18.5177	17.9071	1.69333	1.20996	1.28857	2.43896e-122	-3.86788	down	Putative casein kinase II subunit beta-4 GN=At2g44680 OS=Arabidopsis thaliana (Mouse-ear cress) PE=2 SV=1	PREDICTED: putative casein kinase II subunit beta-4 isoform X1 [Brachypodium distachyon]
TraesCS2A01G245200	59.3868	46.2761	76.2208	5.8772	3.99251	3.38154	5.6186e-52	-3.92128	down	ATP synthase subunit delta&apos;, mitochondrial (Precursor) OS=Ipomoea batatas (Sweet potato) PE=1 SV=1	PREDICTED: ATP synthase subunit delta&apos;, mitochondrial [Brachypodium distachyon]
TraesCS2A01G245500	4.40164	5.17974	4.85008	0.473838	0.295576	0.303982	5.93898e-65	-3.88997	down	--	PREDICTED: WW domain-binding protein 11 [Brachypodium distachyon]
TraesCS2A01G245700	8.10146	7.36419	8.01725	0.326637	0.30882	0.113788	1.12925e-65	-4.97179	down	DNA-binding protein EMBP-1 OS=Triticum aestivum (Wheat) PE=1 SV=1	HALF-1 [Triticum aestivum]
TraesCS2A01G245800	1.68102	1.82135	1.17822	0.117467	0.026458	0.039254	1.48314e-18	-3.95108	down	--	PREDICTED: uncharacterized protein LOC100826935 [Brachypodium distachyon]
TraesCS2A01G245900	116.42	121.851	111.702	16.482	8.8361	8.82951	1.86309e-44	-3.51002	down	40S ribosomal protein S15 GN=OJ1046_F10.119 OS=Oryza sativa subsp. japonica (Rice) PE=2 SV=2	40S ribosomal protein S15 [Triticum urartu]
TraesCS2A01G246000	6.19163	4.9031	4.65707	0.243179	0.202594	0.093955	2.97402e-49	-4.38739	down	Nuclear pore complex protein NUP54 {ECO:0000303|PubMed:21189294} OS=Arabidopsis thaliana (Mouse-ear cress) PE=1 SV=1	predicted protein [Hordeum vulgare subsp. vulgare]
TraesCS2A01G246100	12.43	12.5698	11.625	1.93833	1.32292	1.01991	1.03436e-45	-3.26061	down	Ultraviolet-B receptor UVR8 GN=UVR8 OS=Arabidopsis thaliana (Mouse-ear cress) PE=1 SV=1	predicted protein [Hordeum vulgare subsp. vulgare]
TraesCS2A01G246200	7.95988	7.33862	7.49162	2.00259	0.770484	1.65702	6.62856e-16	-2.51346	down	--	predicted protein [Hordeum vulgare subsp. vulgare]
TraesCS2A01G246300	2.40591	2.45271	2.14644	0.196224	0.082254	0.064881	9.82054e-32	-4.17159	down	Indole-3-acetaldehyde oxidase GN=AO2 OS=Zea mays (Maize) PE=2 SV=1	predicted protein [Hordeum vulgare subsp. vulgare]
TraesCS2A01G246500	2.37271	3.15385	2.38558	0.200693	0.126006	0.007825	2.38681e-21	-4.41949	down	--	hypothetical protein TRIUR3_24222 [Triticum urartu]
TraesCS2A01G246600	10.2242	12.8674	11.3386	1.24375	0.546626	0.780639	2.56548e-73	-3.91424	down	Syntaxin-132 GN=SYP132 OS=Arabidopsis thaliana (Mouse-ear cress) PE=1 SV=1	putative syntaxin-related protein [Triticum aestivum]
TraesCS2A01G246700	4.76858	4.32484	4.00924	0.346803	0.244261	0.275503	1.53328e-117	-4.04118	down	Small RNA 2&apos;-O-methyltransferase GN=T13K14.70 OS=Arabidopsis thaliana (Mouse-ear cress) PE=1 SV=1	hypothetical protein TRIUR3_22256 [Triticum urartu]
TraesCS2A01G246800	20.9389	20.0287	19.3932	5.01575	4.04707	4.15062	2.21817e-68	-2.48486	down	Ubiquitin carboxyl-terminal hydrolase 12 GN=UBP12 OS=Arabidopsis thaliana (Mouse-ear cress) PE=1 SV=2	predicted protein [Hordeum vulgare subsp. vulgare]
TraesCS2A01G247000	11.1465	8.89135	8.69264	1.28441	0.945432	1.15044	1.56028e-115	-3.02015	down	D-lactate dehydrogenase [cytochrome], mitochondrial (Precursor) GN=F15M7.11 OS=Arabidopsis thaliana (Mouse-ear cress) PE=1 SV=1	predicted protein [Hordeum vulgare subsp. vulgare]
TraesCS2A01G247100	2.64307	2.9592	2.83146	0.214205	0.092358	0.05254	2.13498e-31	-4.48734	down	Probable carboxylesterase 15 GN=CXE15 OS=Arabidopsis thaliana (Mouse-ear cress) PE=2 SV=1	putative carboxylesterase 15 [Triticum urartu]
TraesCS2A01G247300	283.012	285.987	282.053	11.3547	8.5863	7.52236	7.30498e-201	-5.11172	down	Oxygen-evolving enhancer protein 1, chloroplastic (Precursor) GN=PSBO OS=Triticum aestivum (Wheat) PE=2 SV=1	Oxygen-evolving enhancer protein 1, chloroplastic [Triticum urartu]
TraesCS2A01G247700	38.8451	42.7104	38.4513	9.31975	7.13784	7.45825	5.70544e-65	-2.51251	down	Ubiquitin-conjugating enzyme E2 2 GN=UBC2 OS=Triticum aestivum (Wheat) PE=1 SV=1	Ubiquitin-conjugating enzyme E2 2 [Triticum urartu]
TraesCS2A01G247800	14.2701	12.9688	12.4709	0.674804	0.396019	0.493031	2.23893e-103	-4.68276	down	--	predicted protein [Hordeum vulgare subsp. vulgare]
TraesCS2A01G248000	1.42587	1.53761	1.97267	0	0	0	1.78712e-20	-7.4104	down	--	hypothetical protein F775_14729 [Aegilops tauschii]
TraesCS2A01G248200	11.941	12.1769	10.6615	1.56773	1.35065	0.912682	1.38105e-61	-3.45362	down	Calcium-dependent protein kinase 1 GN=MUK11.19 OS=Arabidopsis thaliana (Mouse-ear cress) PE=1 SV=1	Calcium-dependent protein kinase 2 [Aegilops tauschii]
TraesCS2A01G248300	11.775	12.7464	11.4899	1.54986	0.971821	0.848848	1.54244e-54	-3.57428	down	Outer envelope protein 61 GN=T6G21.100 OS=Arabidopsis thaliana (Mouse-ear cress) PE=1 SV=1	70 kDa peptidyl-prolyl isomerase [Triticum urartu]
TraesCS2A01G248400	9.41435	10.8871	10.5778	1.03339	0.521842	0.253684	4.22009e-36	-4.06326	down	E3 ubiquitin-protein ligase RHF2A GN=RHF2A OS=Arabidopsis thaliana (Mouse-ear cress) PE=2 SV=1	predicted protein [Hordeum vulgare subsp. vulgare]
TraesCS2A01G248500	2.4689	2.52855	2.3319	0.526839	0.604275	1.49507	6.96856e-77	-3.01781	down	Ubiquitin carboxyl-terminal hydrolase 8 GN=UBP8 OS=Arabidopsis thaliana (Mouse-ear cress) PE=2 SV=2	predicted protein [Hordeum vulgare subsp. vulgare]
TraesCS2A01G248600	2.8825	3.40929	3.62279	0.075749	0	0	6.44945e-26	-6.29673	down	--	hypothetical protein TRIUR3_14755 [Triticum urartu]
TraesCS2A01G248700	1.60133	1.39077	1.9845	0.178463	0.160878	0.045113	2.03674e-19	-3.8613	down	--	hypothetical protein TRIUR3_14754 [Triticum urartu]
TraesCS2A01G248800	6.90262	5.85387	7.37082	0.404987	0.33098	0.17656	2.35324e-68	-4.57562	down	Fasciclin-like arabinogalactan protein 15 (Precursor) GN=FLA15 OS=Arabidopsis thaliana (Mouse-ear cress) PE=2 SV=1	fasciclin-like protein FLA25 [Triticum aestivum]
TraesCS2A01G249100	34.5176	34.5339	27.941	2.25982	0.79641	1.05272	2.3845e-52	-4.69314	down	--	hypothetical protein TRIUR3_23990 [Triticum urartu]
TraesCS2A01G249300	1.60367	1.96383	1.16717	0.103611	0.02655	0	3.19275e-15	-4.67499	down	Probable receptor-like protein kinase At1g49730 (Precursor) GN=At1g49730 OS=Arabidopsis thaliana (Mouse-ear cress) PE=2 SV=1	predicted protein [Hordeum vulgare subsp. vulgare]
TraesCS2A01G249400	4.86428	5.40268	4.47058	0.505871	0.262819	0.278286	6.89292e-49	-3.9269	down	--	predicted protein [Hordeum vulgare subsp. vulgare]
TraesCS2A01G249600	2.63915	2.24347	2.87342	0.078102	0	0	3.29677e-05	-4.32691	down	RNA-binding protein CP33, chloroplastic {ECO:0000305} (Precursor) OS=Arabidopsis thaliana (Mouse-ear cress) PE=2 SV=1	33 kDa ribonucleoprotein, chloroplastic [Triticum urartu]
TraesCS2A01G249700	4.20203	4.0969	4.29298	0.419067	0.103636	0.073857	4.07146e-43	-4.78697	down	--	predicted protein [Hordeum vulgare subsp. vulgare]
TraesCS2A01G249800	1.66794	1.61197	1.48437	0.025773	0.03225	0	8.64384e-23	-5.66707	down	--	predicted protein [Hordeum vulgare subsp. vulgare]
TraesCS2A01G249900	3.93107	4.75805	3.99065	0.267511	0.213252	0.217466	5.07285e-68	-4.29285	down	--	predicted protein [Hordeum vulgare subsp. vulgare]
TraesCS2A01G250000	2.60845	3.07078	2.32162	0.156373	0.09221	0.120865	6.06574e-54	-4.34057	down	--	hypothetical protein TRIUR3_30121 [Triticum urartu]
TraesCS2A01G250200	0.681571	0.46026	0.449282	0.007649	0.065065	0.04001	1.06565e-20	-4.0961	down	--	hypothetical protein F775_01420 [Aegilops tauschii]
TraesCS2A01G250300	24.9989	26.2931	27.5669	2.79459	2.17726	1.62149	1.169e-61	-3.73295	down	--	hypothetical protein F775_43897 [Aegilops tauschii]
TraesCS2A01G250500	2.96951	2.02042	2.44024	0.220719	0.132713	0.154101	1.39406e-45	-3.89465	down	--	hypothetical protein TRIUR3_30021 [Triticum urartu]
TraesCS2A01G250800	18.3378	16.8877	20.8995	0.303467	0.240023	0.387782	4.82823e-132	-4.83426	down	Peroxisomal (S)-2-hydroxy-acid oxidase GLO5 OS=Oryza sativa subsp. japonica (Rice) PE=2 SV=1	PREDICTED: peroxisomal (S)-2-hydroxy-acid oxidase GLO5-like [Oryza brachyantha]
TraesCS2A01G250900	24.2406	27.0593	25.8084	1.19016	0.829733	0.583629	3.51891e-116	-4.99815	down	Peroxisomal membrane protein 13 GN=F21O3.27 OS=Arabidopsis thaliana (Mouse-ear cress) PE=1 SV=1	hypothetical protein F775_30696 [Aegilops tauschii]
TraesCS2A01G251000	0.998713	0.987296	1.51971	0	0	0	6.42267e-28	-8.33716	down	Leucine-rich repeat receptor-like serine/threonine-protein kinase At1g17230 (Precursor) GN=At1g17230 OS=Arabidopsis thaliana (Mouse-ear cress) PE=2 SV=2	predicted protein [Hordeum vulgare subsp. vulgare]
TraesCS2A01G251300	0.551854	0.675225	0.566463	0.039558	0.021046	0.031449	5.68845e-32	-4.08629	down	Auxin response factor 3 OS=Oryza sativa subsp. japonica (Rice) PE=2 SV=1	Auxin response factor 3 [Triticum urartu]
TraesCS2A01G251400	1.91154	2.11038	1.67708	0.179948	0.053201	0.019334	1.81423e-20	-4.30056	down	--	predicted protein [Hordeum vulgare subsp. vulgare]
TraesCS2A01G251600	10.1387	12.8677	10.3295	0.996549	0.756733	0.638479	1.12166e-80	-3.96006	down	Probable inositol transporter 2 GN=INT2 OS=Arabidopsis thaliana (Mouse-ear cress) PE=1 SV=1	predicted protein [Hordeum vulgare subsp. vulgare]
TraesCS2A01G251800	27.8706	29.7098	28.5693	8.47363	5.04711	4.71766	1.7831e-24	-2.41505	down	CBL-interacting protein kinase 23 GN=OJ1027_G06.32 OS=Oryza sativa subsp. japonica (Rice) PE=2 SV=1	CBL-interacting protein kinase 23 [Hordeum vulgare subsp. spontaneum]
TraesCS2A01G251900	6.65482	5.34326	6.52045	0.537207	0.331084	0.440743	1.92383e-86	-4.071	down	--	Nuclear-interacting partner of ALK [Aegilops tauschii]
TraesCS2A01G252100	1.45058	1.5786	1.31271	0.021932	0.02346	0.059166	1.04422e-36	-4.7303	down	CSC1-like protein ERD4 GN=ERD4 OS=Arabidopsis thaliana (Mouse-ear cress) PE=2 SV=1	Uncharacterized membrane protein C24H6.13 [Triticum urartu]
TraesCS2A01G252200	1.26973	1.40139	1.54677	0.097125	0	0.01426	2.10335e-18	-4.90324	down	Pentatricopeptide repeat-containing protein At4g21065 GN=PCMP-H28 OS=Arabidopsis thaliana (Mouse-ear cress) PE=2 SV=2	hypothetical protein F775_09464 [Aegilops tauschii]
TraesCS2A01G252400	3.96816	3.31231	3.25936	0.10323	0.009754	0.015358	1.80153e-11	-5.23466	down	Factor of DNA methylation 1 {ECO:0000303|PubMed:22302148} OS=Arabidopsis thaliana (Mouse-ear cress) PE=1 SV=1	hypothetical protein TRIUR3_12203 [Triticum urartu]
TraesCS2A01G252600	252.133	248.623	248.447	3.78508	2.40974	1.97887	4.22852e-222	-6.64514	down	Photosystem I reaction center subunit psaK, chloroplastic (Precursor) GN=PSAK OS=Hordeum vulgare (Barley) PE=1 SV=1	Photosystem I reaction center subunit psaK, chloroplastic [Triticum urartu]
TraesCS2A01G252700	0.642026	0.553211	0.710204	0.011692	0.009944	0	4.98993e-41	-6.03535	down	187-kDa microtubule-associated protein AIR9 GN=AIR9 OS=Arabidopsis thaliana (Mouse-ear cress) PE=2 SV=1	Protein phosphatase 1 regulatory subunit pprA [Aegilops tauschii]
TraesCS2A01G252800	9.12507	9.08465	7.07276	0.447425	0.306507	0.260507	8.43017e-86	-4.75585	down	Ferredoxin--NADP reductase, embryo isozyme, chloroplastic (Precursor) GN=P0022E03.21-1 OS=Oryza sativa subsp. japonica (Rice) PE=1 SV=1	Ferredoxin--NADP reductase, embryo isozyme, chloroplastic [Aegilops tauschii]
TraesCS2A01G252900	4.29381	4.76462	4.37677	0.494328	0.199824	0.132395	3.10684e-24	-4.11065	down	WPP domain-associated protein GN=WAP OS=Arabidopsis thaliana (Mouse-ear cress) PE=1 SV=2	hypothetical protein TRIUR3_34850 [Triticum urartu]
TraesCS2A01G253200	0.806796	0.695265	0.784415	0.023325	0.029931	0.037095	2.85243e-34	-4.51608	down	Probable receptor-like protein kinase At1g30570 (Precursor) GN=At1g30570 OS=Arabidopsis thaliana (Mouse-ear cress) PE=3 SV=1	predicted protein [Hordeum vulgare subsp. vulgare]
TraesCS2A01G253300	4.39306	2.73189	3.65054	0.162904	0.086621	0.064706	2.5523e-38	-5.09618	down	Cyclin-H1-1 OS=Oryza sativa subsp. japonica (Rice) PE=1 SV=1	hypothetical protein F775_06942 [Aegilops tauschii]
TraesCS2A01G253500	1.36315	1.1852	1.00641	0.005822	0.006226	0.011575	7.28911e-52	-6.52281	down	Probable LRR receptor-like serine/threonine-protein kinase At4g20940 GN=At4g20940 OS=Arabidopsis thaliana (Mouse-ear cress) PE=1 SV=1	Putative LRR receptor-like serine/threonine-protein kinase [Aegilops tauschii]
TraesCS2A01G253600	0.833275	0.864109	0.981877	0.0212	0	0	8.20117e-18	-5.70573	down	60S ribosomal protein L4-1 GN=RPL4A OS=Arabidopsis thaliana (Mouse-ear cress) PE=2 SV=1	60S ribosomal protein L4-1 [Triticum urartu]
TraesCS2A01G253700	2.8856	3.10171	2.91005	0.375382	0.285737	0.209841	1.07447e-51	-3.44869	down	DEAD-box ATP-dependent RNA helicase 53 OS=Oryza sativa subsp. japonica (Rice) PE=2 SV=2	DEAD-box ATP-dependent RNA helicase 53 [Triticum urartu]
TraesCS2A01G253800	1.71599	1.60767	1.37269	0.031285	0.038094	0.018952	6.67307e-23	-5.0968	down	Cadmium-induced protein AS8 GN=At4g19070 OS=Arabidopsis thaliana (Mouse-ear cress) PE=2 SV=1	predicted protein [Hordeum vulgare subsp. vulgare]
TraesCS2A01G253900	1.76727	1.32782	1.55852	0.371563	0.098116	0.069843	2.86704e-09	-2.94434	down	Transcription factor PIF5 GN=F17J16.110 OS=Arabidopsis thaliana (Mouse-ear cress) PE=1 SV=1	PREDICTED: transcription factor PIF4-like isoform X1 [Brachypodium distachyon]
TraesCS2A01G254100	8.38914	11.099	16.4991	0.085736	0	0.021693	3.32336e-20	-7.03125	down	Uncharacterized oxidoreductase At1g06690, chloroplastic (Precursor) GN=At1g06690 OS=Arabidopsis thaliana (Mouse-ear cress) PE=2 SV=1	PREDICTED: uncharacterized oxidoreductase At1g06690, chloroplastic-like [Brachypodium distachyon]
TraesCS2A01G254200	4.08406	3.76815	3.41513	0.06925	0.05043	0.044951	1.98534e-66	-6.20169	down	Uncharacterized oxidoreductase At1g06690, chloroplastic (Precursor) GN=At1g06690 OS=Arabidopsis thaliana (Mouse-ear cress) PE=2 SV=1	predicted protein [Hordeum vulgare subsp. vulgare]
TraesCS2A01G254300	5.64363	4.0486	4.23693	0.335883	0.115627	0.055866	8.78572e-18	-4.07295	down	Reticulon-like protein B8 GN=RTNLB8 OS=Arabidopsis thaliana (Mouse-ear cress) PE=2 SV=1	PREDICTED: reticulon-like protein B8 [Brachypodium distachyon]
TraesCS2A01G254400	3.37207	2.35232	2.51178	0.100554	0.02376	0.062256	7.49034e-55	-5.223	down	--	hypothetical protein F775_24920 [Aegilops tauschii]
TraesCS2A01G254500	9.53165	11.6331	9.15041	0.013383	0	0	1.15923e-48	-8.92646	down	--	hypothetical protein F775_23558 [Aegilops tauschii]
TraesCS2A01G254600	202.475	192.811	192.687	22.0981	20.6004	20.498	0	-3.4154	down	Oxygen-evolving enhancer protein 2, chloroplastic (Precursor) GN=PSBP OS=Triticum aestivum (Wheat) PE=2 SV=1	RecName: Full=Oxygen-evolving enhancer protein 2, chloroplastic; Short=OEE2; AltName: Full=23 kDa subunit of oxygen evolving system of photosystem II; AltName: Full=23 kDa thylakoid membrane protein; AltName: Full=OEC 23 kDa subunit; Flags: Precursor [Triticum aestivum]
TraesCS2A01G254800	4.46291	4.56928	4.49764	0.490698	0.217131	0.131064	7.25343e-28	-4.04127	down	--	PREDICTED: differentially expressed in FDCP 6 homolog isoform X1 [Brachypodium distachyon]
TraesCS2A01G255000	4.57662	3.89286	3.99127	0.430537	0.313609	0.306059	1.96253e-103	-3.74241	down	--	hypothetical protein F775_06610 [Aegilops tauschii]
TraesCS2A01G255100	12.8501	13.3852	11.737	2.10636	1.4656	1.67756	2.05953e-77	-3.04472	down	Succinate dehydrogenase [ubiquinone] flavoprotein subunit, mitochondrial (Precursor) GN=P0507H12.27 OS=Oryza sativa subsp. japonica (Rice) PE=2 SV=1	predicted protein [Hordeum vulgare subsp. vulgare]
TraesCS2A01G255300	0.862122	1.00374	1.04593	0.012385	0.008829	0.032828	3.19688e-37	-5.1802	down	Probable LRR receptor-like serine/threonine-protein kinase At2g16250 (Precursor) GN=At2g16250 OS=Arabidopsis thaliana (Mouse-ear cress) PE=2 SV=1	predicted protein [Hordeum vulgare subsp. vulgare]
TraesCS2A01G255800	7.90372	8.27095	6.48882	0.746	0.620461	0.420192	7.57984e-62	-3.78813	down	BTB/POZ and MATH domain-containing protein 3 GN=BPM3 OS=Arabidopsis thaliana (Mouse-ear cress) PE=1 SV=1	predicted protein [Hordeum vulgare subsp. vulgare]
TraesCS2A01G256000	1.79354	1.66402	1.67422	0.080638	0.107397	0.16601	3.21574e-31	-3.90427	down	Probable tetraacyldisaccharide 4&apos;-kinase, mitochondrial (Precursor) GN=LPXK OS=Arabidopsis thaliana (Mouse-ear cress) PE=2 SV=1	PREDICTED: probable tetraacyldisaccharide 4&apos;-kinase, mitochondrial [Brachypodium distachyon]
TraesCS2A01G256300	3.29829	3.75127	4.10325	0.575116	0.50678	0.483713	5.80308e-54	-3.00193	down	Uncharacterized protein At5g41620 GN=At5g41620 OS=Arabidopsis thaliana (Mouse-ear cress) PE=2 SV=2	hypothetical protein F775_17004 [Aegilops tauschii]
TraesCS2A01G256400	6.78257	6.65425	7.41493	1.41685	1.97338	1.60885	3.69209e-37	-2.19542	down	Uncharacterized GPI-anchored protein At1g61900 (Precursor) GN=At1g61900 OS=Arabidopsis thaliana (Mouse-ear cress) PE=1 SV=1	PREDICTED: uncharacterized GPI-anchored protein At1g61900-like [Setaria italica]
TraesCS2A01G256500	4.38323	3.86254	3.60092	0.380433	0.233315	0.106029	6.79103e-32	-4.10609	down	Polyadenylate-binding protein RBP45 GN=RBP45 OS=Nicotiana plumbaginifolia (Leadwort-leaved tobacco) PE=1 SV=1	Putative RNA-binding protein [Aegilops tauschii]
TraesCS2A01G256700	22.8456	25.6405	23.0605	2.2902	1.05704	1.19298	4.99675e-50	-4.10412	down	Tobamovirus multiplication protein 1 GN=F17L22.250 OS=Arabidopsis thaliana (Mouse-ear cress) PE=1 SV=1	predicted protein [Hordeum vulgare subsp. vulgare]
TraesCS2A01G256800	4.22979	3.69083	3.71355	0.265445	0.166826	0.09028	3.19764e-48	-4.54562	down	Serine/threonine-protein phosphatase 7 long form homolog GN=At1g48120 OS=Arabidopsis thaliana (Mouse-ear cress) PE=2 SV=1	hypothetical protein F775_23308 [Aegilops tauschii]
TraesCS2A01G256900	49.799	61.4619	52.7941	5.11709	2.68694	2.47535	1.78365e-50	-4.12494	down	La-related protein 6C GN=LARP6C OS=Arabidopsis thaliana (Mouse-ear cress) PE=3 SV=1	La-related protein 7 [Triticum urartu]
TraesCS2A01G257000	14.6254	16.0985	14.1128	1.38102	0.91414	0.981021	7.0066e-99	-3.94384	down	26S proteasome non-ATPase regulatory subunit 11 homolog GN=F28N24.15 OS=Arabidopsis thaliana (Mouse-ear cress) PE=1 SV=1	26S proteasome non-ATPase regulatory subunit 11 [Triticum urartu]
TraesCS2A01G257200	1.92131	2.25004	1.88634	0.18353	0.08182	0.040949	2.76923e-28	-4.30578	down	Glutamate receptor 3.5 (Precursor) GN=T32F6.9 OS=Arabidopsis thaliana (Mouse-ear cress) PE=2 SV=2	predicted protein [Hordeum vulgare subsp. vulgare]
TraesCS2A01G257300	19.8355	17.7589	17.4668	4.98903	4.15431	4.28524	7.7807e-64	-2.23061	down	DDRGK domain-containing protein 1 (Precursor) OS=Oryza sativa subsp. japonica (Rice) PE=2 SV=1	predicted protein [Hordeum vulgare subsp. vulgare]
TraesCS2A01G257400	0.279053	0.179805	0.45707	0	0.00311	0.004307	4.09131e-27	-6.06606	down	--	--
TraesCS2A01G257600	0.702164	2.02242	0.667085	0	0	0	2.22622e-19	-7.41631	down	--	hypothetical protein F775_09678 [Aegilops tauschii]
TraesCS2A01G257700	0.533205	0.670248	0.681394	0.089623	0.298032	0.041683	2.82923e-12	-3.29729	down	--	Tryptophan synthase beta chain 2 [Triticum urartu]
TraesCS2A01G257800	4.09517	3.9874	4.35306	0.238111	0.250737	0.11049	1.07053e-62	-4.34777	down	--	hypothetical protein F775_09678 [Aegilops tauschii]
TraesCS2A01G258000	0.985095	1.02792	1.11798	0.136368	0.007722	0.003513	7.66191e-09	-3.93976	down	Uncharacterized mitochondrial protein AtMg00310 GN=AtMg00310 OS=Arabidopsis thaliana (Mouse-ear cress) PE=4 SV=1	hypothetical protein SORBIDRAFT_05g019526 [Sorghum bicolor]
TraesCS2A01G258100	7.09981	6.30835	5.37167	0.457878	0.194655	0.314908	1.56075e-58	-4.28557	down	Protein argonaute 1B GN=OSJNBa0005N02.3 OS=Oryza sativa subsp. japonica (Rice) PE=2 SV=3	PREDICTED: protein argonaute 1B-like isoform X2 [Setaria italica]
TraesCS2A01G258200	2.52998	2.25211	2.72566	0.108544	0.254435	0.248802	3.49864e-63	-3.8002	down	Protein argonaute 1A GN=OJ1493_H11.13 OS=Oryza sativa subsp. japonica (Rice) PE=2 SV=1	PREDICTED: uncharacterized protein LOC100304327 isoform X2 [Zea mays]
TraesCS2A01G258900	1.90084	2.05949	1.66765	0.330398	0.171519	0.193604	5.94553e-36	-2.83433	down	--	PREDICTED: uncharacterized protein LOC100823404 [Brachypodium distachyon]
TraesCS2A01G259400	7.18531	7.15862	6.70443	0.426468	0.260694	0.393268	1.55979e-171	-4.51328	down	--	Leucine-rich repeat-containing protein 48 [Triticum urartu]
TraesCS2A01G259600	3.83589	3.55094	3.17608	0.21809	0.181403	0.071264	4.98606e-52	-4.56419	down	--	U3 small nucleolar RNA-associated protein 6-like protein [Triticum urartu]
TraesCS2A01G259900	23.5948	24.9498	20.9478	0.257323	0.139004	0.065294	6.13704e-118	-7.20775	down	Dirigent protein 1 (Precursor) GN=DIR1 OS=Arabidopsis thaliana (Mouse-ear cress) PE=2 SV=1	hypothetical protein TRIUR3_30230 [Triticum urartu]
TraesCS2A01G260000	1.22933	1.15257	1.14718	0.103551	0.061329	0.035349	4.2957e-41	-4.21895	down	Phytosulfokine receptor 2 (Precursor) GN=PSKR2 OS=Arabidopsis thaliana (Mouse-ear cress) PE=2 SV=1	predicted protein [Hordeum vulgare subsp. vulgare]
TraesCS2A01G260100	3.60836	4.25724	4.42028	0.332032	0.183683	0.153351	3.84211e-55	-4.30928	down	--	hypothetical protein TRIUR3_33701 [Triticum urartu]
TraesCS2A01G260400	4.25847	3.54859	4.02636	0.525364	0.353019	0.267859	2.24646e-48	-3.52268	down	--	Nipped-B-like protein [Aegilops tauschii]
TraesCS2A01G260500	15.3098	15.3617	14.9296	2.32738	1.84798	2.01821	2.18231e-134	-3.07654	down	--	predicted protein [Hordeum vulgare subsp. vulgare]
TraesCS2A01G260600	0.832685	0.994359	0.710425	0.03599	0.025127	0.038966	2.17243e-28	-4.51391	down	LRR receptor-like serine/threonine-protein kinase RPK2 (Precursor) OS=Arabidopsis thaliana (Mouse-ear cress) PE=2 SV=1	LRR receptor-like serine/threonine-protein kinase RPK2 [Aegilops tauschii]
TraesCS2A01G260700	65.0587	65.8986	66.4419	7.30436	4.17506	3.66403	1.64964e-55	-3.86062	down	60S ribosomal protein L13a-4 GN=RPL13AD OS=Arabidopsis thaliana (Mouse-ear cress) PE=2 SV=1	60S ribosomal protein L13a-4 [Triticum urartu]
TraesCS2A01G261000	4.52946	4.27038	4.97719	0.158195	0.186665	0.069488	7.51197e-80	-5.1569	down	Protein LONGIFOLIA 1 GN=T20K14.190 OS=Arabidopsis thaliana (Mouse-ear cress) PE=1 SV=1	hypothetical protein TRIUR3_24559 [Triticum urartu]
TraesCS2A01G261100	2.2315	2.04412	2.17961	0.216152	0.081787	0.025635	6.27681e-19	-4.23151	down	--	hypothetical protein F775_05757 [Aegilops tauschii]
TraesCS2A01G261200	13.0947	12.8512	12.9421	0.397654	0.325609	0.704226	4.22845e-117	-4.82695	down	MADS-box transcription factor 15 OS=Oryza sativa subsp. japonica (Rice) PE=1 SV=2	MADS-box transcription factor TaAGL29 [Triticum aestivum]
TraesCS2A01G261400	21.6821	27.1512	22.105	0.68218	0.796446	0.250257	3.96385e-77	-5.43032	down	ADP-ribosylation factor GTPase-activating protein AGD12 GN=F7J7.100 OS=Arabidopsis thaliana (Mouse-ear cress) PE=1 SV=1	putative ADP-ribosylation factor GTPase-activating protein AGD11 [Triticum urartu]
TraesCS2A01G261500	145.351	187.477	164.865	4.4708	2.2737	2.09892	1.44191e-101	-5.90763	down	Probable ADP-ribosylation factor GTPase-activating protein AGD13 GN=AGD13 OS=Arabidopsis thaliana (Mouse-ear cress) PE=2 SV=1	putative ADP-ribosylation factor GTPase-activating protein AGD13 [Triticum urartu]
TraesCS2A01G261600	24.2908	25.3517	25.8098	3.19495	2.76067	2.34721	3.04983e-110	-3.31367	down	Glutamate--glyoxylate aminotransferase 2 OS=Arabidopsis thaliana (Mouse-ear cress) PE=1 SV=1	Alanine aminotransferase 2 [Triticum urartu]
TraesCS2A01G261800	0.916494	0.829841	0.463806	0.072331	0.053277	0.041757	3.33317e-16	-3.50762	down	Protein pleiotropic regulator PRL2 GN=PRL2 OS=Arabidopsis thaliana (Mouse-ear cress) PE=2 SV=2	predicted protein [Hordeum vulgare subsp. vulgare]
TraesCS2A01G262000	6.83157	6.81724	6.45609	0.590071	0.4564	0.241495	1.63845e-51	-4.08865	down	Probable inactive purple acid phosphatase 2 (Precursor) GN=PAP2 OS=Arabidopsis thaliana (Mouse-ear cress) PE=2 SV=1	putative inactive purple acid phosphatase 2 [Triticum urartu]
TraesCS2A01G262200	29.9299	37.908	30.7861	3.09828	1.07625	1.88693	4.67642e-38	-4.11685	down	--	PREDICTED: protein kish-like [Brachypodium distachyon]
TraesCS2A01G262400	21.7955	24.0352	21.7968	0.691481	0.657011	0.782358	1.96796e-150	-5.11916	down	Lamin-like protein (Precursor) GN=At5g15350 OS=Arabidopsis thaliana (Mouse-ear cress) PE=1 SV=1	predicted protein [Hordeum vulgare subsp. vulgare]
TraesCS2A01G262500	270.304	302.15	289.636	50.7465	40.6079	40.5639	3.27107e-99	-2.88781	down	Eukaryotic translation initiation factor 5A-1 OS=Solanum lycopersicum (Tomato) PE=2 SV=1	eukaryotic translation initiation factor 5A1 [Triticum aestivum]
TraesCS2A01G262600	1.91755	1.69311	1.82667	0.200322	0.096696	0.126242	1.07821e-47	-3.81396	down	Zinc finger CCCH domain-containing protein 55 OS=Oryza sativa subsp. japonica (Rice) PE=2 SV=1	hypothetical protein TRIUR3_25454 [Triticum urartu]
TraesCS2A01G262700	1.9062	2.59169	2.08829	0.208153	0.0943	0.04279	1.09297e-21	-4.04004	down	Glutamyl-tRNA(Gln) amidotransferase subunit B, chloroplastic/mitochondrial {ECO:0000255|HAMAP-Rule:MF_03147} (Precursor) OS=Oryza sativa subsp. japonica (Rice) PE=2 SV=1	Aspartyl/glutamyl-tRNA(Asn/Gln) amidotransferase subunit B [Triticum urartu]
TraesCS2A01G262900	0.906437	0.623096	1.00639	0.020149	0.021618	0	7.83334e-24	-5.10502	down	Factor of DNA methylation 1 {ECO:0000303|PubMed:22302148} OS=Arabidopsis thaliana (Mouse-ear cress) PE=1 SV=1	hypothetical protein F775_24890 [Aegilops tauschii]
TraesCS2A01G263200	8.27694	7.48638	6.9219	1.51926	1.07132	1.49042	2.07581e-57	-2.67099	down	Suppressor of RPS4-RLD 1 {ECO:0000303|PubMed:15469494} OS=Arabidopsis thaliana (Mouse-ear cress) PE=1 SV=1	Tetratricopeptide repeat protein 13 [Aegilops tauschii]
TraesCS2A01G263300	216.517	227.768	222.269	16.0994	8.91932	9.89748	3.30516e-87	-4.40729	down	Uncharacterized protein At2g23090 GN=At2g23090 OS=Arabidopsis thaliana (Mouse-ear cress) PE=1 SV=1	predicted protein [Hordeum vulgare subsp. vulgare]
TraesCS2A01G263400	13.2551	15.1314	16.1925	1.8768	1.90299	1.20128	3.27048e-68	-3.40242	down	Casein kinase II subunit alpha GN=ACK2 OS=Zea mays (Maize) PE=1 SV=1	casein protein kinase 2 alpha subunit [Lolium perenne]
TraesCS2A01G263700	3.92781	3.89414	4.39979	0.211222	0.154255	0.109138	3.10206e-27	-4.55473	down	--	hypothetical protein TRIUR3_10389 [Triticum urartu]
TraesCS2A01G263900	22.7167	32.0562	22.4049	2.03247	0.894165	0.987488	5.48537e-45	-4.40038	down	--	predicted protein [Hordeum vulgare subsp. vulgare]
TraesCS2A01G264000	10.7187	14.421	8.92922	1.78119	0.90333	0.663872	7.00385e-22	-3.43972	down	Ribonuclease 3 (Precursor) GN=RNS3 OS=Arabidopsis thaliana (Mouse-ear cress) PE=2 SV=1	Ribonuclease 3 [Triticum urartu]
TraesCS2A01G264100	2.29354	3.02131	4.44158	0.445607	0.269064	0.420618	1.42161e-22	-3.18453	down	--	PREDICTED: uncharacterized protein LOC100846168 [Brachypodium distachyon]
TraesCS2A01G264200	1.68068	1.61723	1.34741	0.172711	0.023741	0.014712	4.36189e-12	-3.96183	down	--	predicted protein [Hordeum vulgare subsp. vulgare]
TraesCS2A01G264300	3.68735	4.1401	4.04239	0.449025	0.285078	0.268318	7.47129e-60	-3.70258	down	Vacuolar protein sorting-associated protein 45 homolog GN=VPS45 OS=Arabidopsis thaliana (Mouse-ear cress) PE=1 SV=2	PREDICTED: vacuolar protein sorting-associated protein 45 homolog [Brachypodium distachyon]
TraesCS2A01G264600	2.27721	1.78533	1.96926	0.091289	0.040499	0.045509	2.41936e-66	-4.95623	down	Mitogen-activated protein kinase kinase kinase YODA GN=YDA OS=Arabidopsis thaliana (Mouse-ear cress) PE=1 SV=1	Mitogen-activated protein kinase kinase kinase 1 [Aegilops tauschii]
TraesCS2A01G264800	12.4907	11.9339	15.1747	0.324195	0.183239	0.129853	7.76122e-104	-5.95989	down	Transcription factor PCL1 OS=Oryza sativa subsp. japonica (Rice) PE=2 SV=1	predicted protein [Hordeum vulgare subsp. vulgare]
TraesCS2A01G264900	2.9504	2.29598	2.97644	0.078382	0.01387	0.013206	2.57286e-47	-5.92272	down	L-ascorbate oxidase homolog (Precursor) OS=Nicotiana tabacum (Common tobacco) PE=1 SV=1	L-ascorbate oxidase-like protein [Aegilops tauschii]
TraesCS2A01G265000	3.24459	3.81121	4.04749	0.221878	0.148831	0.065393	2.56332e-29	-4.57353	down	--	hypothetical protein F775_31792 [Aegilops tauschii]
TraesCS2A01G265100	0.667094	0.794125	0.774752	0.124611	0.206828	0.121493	6.56947e-13	-2.34491	down	--	predicted protein [Hordeum vulgare subsp. vulgare]
TraesCS2A01G265800	4.5049	4.81768	4.39217	0.409622	0.149329	0.100557	1.07753e-29	-4.33425	down	--	hypothetical protein F775_31792 [Aegilops tauschii]
TraesCS2A01G266200	1.00279	1.59863	1.2708	0.029033	0	0.023005	7.45524e-18	-5.31111	down	Plastid division protein PDV2 GN=PDV2 OS=Arabidopsis thaliana (Mouse-ear cress) PE=1 SV=1	predicted protein [Hordeum vulgare subsp. vulgare]
TraesCS2A01G266700	10.3123	9.78548	9.18043	1.25463	0.606394	0.847858	6.91209e-43	-3.60652	down	Dynein assembly factor with WDR repeat domains 1 GN=DAW1 OS=Chlamydomonas reinhardtii (Chlamydomonas smithii) PE=1 SV=1	PREDICTED: phospholipase A-2-activating protein [Brachypodium distachyon]
TraesCS2A01G267000	1.95543	1.6831	2.50783	0.138076	0.14853	0.153533	4.35923e-48	-3.813	down	--	Ankyrin repeat and SOCS box protein 3 [Aegilops tauschii]
TraesCS2A01G267100	0.881724	0.830858	0.913338	0	0.10912	0.063433	8.34075e-11	-3.7323	down	Protein PHLOEM PROTEIN 2-LIKE A10 GN=PP2A10 OS=Arabidopsis thaliana (Mouse-ear cress) PE=2 SV=1	PREDICTED: protein PHLOEM PROTEIN 2-LIKE A10-like [Brachypodium distachyon]
TraesCS2A01G267300	1.41206	1.98622	1.52635	0.127717	0.350905	0.034517	8.85703e-08	-3.06026	down	DnaJ protein P58IPK homolog (Precursor) OS=Arabidopsis thaliana (Mouse-ear cress) PE=1 SV=1	predicted protein [Hordeum vulgare subsp. vulgare]
TraesCS2A01G267500	9.05294	7.46514	7.75141	1.63643	1.06668	1.32227	2.24595e-55	-2.82681	down	RNA-binding protein 1 GN=F9K23.11 OS=Arabidopsis thaliana (Mouse-ear cress) PE=2 SV=1	DAZ-associated protein 1 [Aegilops tauschii]
TraesCS2A01G267900	5.35882	5.50253	5.56053	0.574198	0.318027	0.25985	1.08261e-49	-3.94883	down	--	predicted protein [Hordeum vulgare subsp. vulgare]
TraesCS2A01G268200	37.0814	32.842	18.1077	0.808788	0.408925	0.316801	2.32372e-65	-5.82164	down	Amino acid permease 6 GN=AAP6 OS=Arabidopsis thaliana (Mouse-ear cress) PE=1 SV=1	hypothetical protein TRIUR3_26560 [Triticum urartu]
TraesCS2A01G268300	2.68113	2.58163	3.05726	0.090283	0.026833	0	4.75116e-06	-4.49308	down	Leucine-rich repeat receptor-like serine/threonine-protein kinase BAM1 (Precursor) GN=BAM1 OS=Arabidopsis thaliana (Mouse-ear cress) PE=1 SV=1	predicted protein [Hordeum vulgare subsp. vulgare]
TraesCS2A01G268400	19.7278	16.8966	11.018	0.864933	0.64686	0.80763	1.4967e-74	-4.48561	down	Proline transporter 1 GN=OSJNBa0038E17.23 OS=Oryza sativa subsp. japonica (Rice) PE=2 SV=1	hypothetical protein TRIUR3_28203 [Triticum urartu]
TraesCS2A01G268500	6.89285	7.06229	8.25023	0.241653	0	0.055614	1.32785e-06	-4.63288	down	--	hypothetical protein F775_03923 [Aegilops tauschii]
TraesCS2A01G268600	5.19955	5.70796	5.30949	0.354311	0.271072	0.165733	2.7956e-85	-4.47475	down	--	hypothetical protein F775_32915 [Aegilops tauschii]
TraesCS2A01G268700	4.41578	4.38192	4.66605	0.45224	0.406685	0.214966	2.49344e-50	-3.78808	down	--	predicted protein [Hordeum vulgare subsp. vulgare]
TraesCS2A01G268800	10.7748	11.2405	9.0308	2.62977	1.21412	1.34507	5.13331e-20	-2.72602	down	Probable pyridoxal biosynthesis protein PDX1.1 OS=Oryza sativa subsp. japonica (Rice) PE=2 SV=1	predicted protein [Hordeum vulgare subsp. vulgare]
TraesCS2A01G269000	2.63917	2.83787	2.52916	0.047175	0.02344	0.046588	1.62222e-50	-5.63825	down	--	PREDICTED: tRNA-dihydrouridine(47) synthase [NAD(P)(+)]-like isoform X1 [Brachypodium distachyon]
TraesCS2A01G269100	1.62195	1.78519	2.06088	0.099572	0.128706	0.062894	2.44823e-56	-4.07985	down	Putative uracil phosphoribosyltransferase GN=UKL3 OS=Arabidopsis thaliana (Mouse-ear cress) PE=2 SV=1	PREDICTED: uncharacterized protein LOC100840996 isoform X1 [Brachypodium distachyon]
TraesCS2A01G269200	8.64837	12.0054	10.1543	0.259095	0.17889	0.084551	4.78307e-75	-5.90485	down	Fasciclin-like arabinogalactan protein 14 (Precursor) GN=FLA14 OS=Arabidopsis thaliana (Mouse-ear cress) PE=2 SV=1	Os02g0461500 [Oryza sativa Japonica Group]
TraesCS2A01G269400	66.0204	74.5596	58.948	2.13448	1.67577	1.21597	6.25905e-133	-5.38806	down	CASP-like protein 2A1 OS=Oryza sativa subsp. japonica (Rice) PE=2 SV=1	predicted protein [Hordeum vulgare subsp. vulgare]
TraesCS2A01G269500	185.838	251.395	215.887	11.5002	7.58645	7.96223	1.95677e-117	-4.75384	down	--	predicted protein [Hordeum vulgare subsp. vulgare]
TraesCS2A01G269900	17.1311	15.6851	18.1406	0.767479	0.38896	0.512354	4.81961e-97	-5.02277	down	--	hypothetical protein TRIUR3_29773 [Triticum urartu]
TraesCS2A01G270000	4.28811	5.79335	5.22808	0.456195	0.284377	0.146016	9.01751e-32	-4.05505	down	--	hypothetical protein TRIUR3_19622 [Triticum urartu]
TraesCS2A01G270200	4.52118	4.36524	5.55181	0.178972	0.129864	0	6.90323e-07	-4.42819	down	Probable WRKY transcription factor 11 GN=WRKY11 OS=Arabidopsis thaliana (Mouse-ear cress) PE=2 SV=2	WRKY51 [Triticum aestivum]
TraesCS2A01G270400	1.81062	1.3188	1.52481	0.201702	0.122024	0.026357	3.78175e-15	-3.63345	down	Probable ribonuclease P/MRP protein subunit POP5 GN=EMB1687 OS=Arabidopsis thaliana (Mouse-ear cress) PE=2 SV=1	putative ribonuclease P/MRP protein subunit POP5 [Triticum urartu]
TraesCS2A01G270500	13.4455	13.6984	11.2662	1.27484	0.55995	0.7238	7.60143e-43	-4.012	down	--	predicted protein [Hordeum vulgare subsp. vulgare]
TraesCS2A01G270600	13.7284	14.5898	12.3882	2.35631	1.65191	1.72233	1.07529e-64	-3.00726	down	Metal tolerance protein C4 OS=Arabidopsis thaliana (Mouse-ear cress) PE=2 SV=1	PREDICTED: metal tolerance protein C4-like [Oryza brachyantha]
TraesCS2A01G270700	9.73902	8.76002	8.43404	1.02214	0.967698	0.467374	3.43947e-40	-3.57814	down	--	predicted protein [Hordeum vulgare subsp. vulgare]
TraesCS2A01G270900	1.37679	1.65358	1.67646	0.818099	0.635003	0.490647	5.4434e-20	-2.30823	down	--	hypothetical protein F775_24449 [Aegilops tauschii]
TraesCS2A01G271300	1.68626	2.33158	2.62806	0.420084	0.145032	0.186069	6.52119e-14	-3.18457	down	LOB domain-containing protein 41 GN=F16B3.18 OS=Arabidopsis thaliana (Mouse-ear cress) PE=2 SV=1	predicted protein [Hordeum vulgare subsp. vulgare]
TraesCS2A01G272000	6.32018	5.18811	5.97064	0.565557	0.640817	0.324772	3.14284e-44	-3.65665	down	Probable methionine--tRNA ligase OS=Oryza sativa subsp. japonica (Rice) PE=2 SV=2	predicted protein [Hordeum vulgare subsp. vulgare]
TraesCS2A01G272100	2.66087	2.74962	2.61319	0.059062	0.189028	0.019421	4.54891e-27	-4.74	down	Oligoribonuclease GN=At2g26970 OS=Arabidopsis thaliana (Mouse-ear cress) PE=2 SV=2	Oligoribonuclease [Triticum urartu]
TraesCS2A01G272200	4.62017	5.06484	4.12775	0.386421	0.409943	0.857414	5.188e-24	-3.25516	down	--	predicted protein [Hordeum vulgare subsp. vulgare]
TraesCS2A01G272400	1.68824	1.29639	1.47354	0.088661	0.078314	0.054744	4.37153e-44	-3.97807	down	Phototropin-2 GN=OSJNBa0079M09.13 OS=Oryza sativa subsp. japonica (Rice) PE=1 SV=1	PREDICTED: phototropin-2 [Brachypodium distachyon]
TraesCS2A01G272500	1.74353	2.10251	2.08223	0.046042	0.028059	0	1.01978e-17	-5.40613	down	Preprotein translocase subunit SECE1 (Precursor) GN=SECE1 OS=Arabidopsis thaliana (Mouse-ear cress) PE=1 SV=1	hypothetical protein TRIUR3_25703 [Triticum urartu]
TraesCS2A01G272600	8.50537	7.6869	7.13811	0.95194	0.694498	0.759155	4.1388e-69	-3.64349	down	Polyadenylate-binding protein 2 {ECO:0000303|PubMed:18479511} OS=Arabidopsis thaliana (Mouse-ear cress) PE=1 SV=1	predicted protein [Hordeum vulgare subsp. vulgare]
TraesCS2A01G272700	20.2869	18.7392	18.2996	1.74606	1.11052	1.02472	2.02365e-82	-4.04575	down	DnaJ protein ERDJ2A OS=Arabidopsis thaliana (Mouse-ear cress) PE=1 SV=1	Translocation SEC63-like protein [Aegilops tauschii]
TraesCS2A01G272800	42.5832	54.3759	46.413	4.75259	2.734	3.46615	3.53895e-69	-3.87207	down	NADH dehydrogenase [ubiquinone] 1 alpha subcomplex subunit 2 GN=At5g47890 OS=Arabidopsis thaliana (Mouse-ear cress) PE=3 SV=1	predicted protein [Hordeum vulgare subsp. vulgare]
TraesCS2A01G272900	274.888	370.613	682.299	11.5423	10.3622	10.2178	6.25086e-74	-5.46455	down	4-coumarate--CoA ligase-like 9 OS=Oryza sativa subsp. japonica (Rice) PE=2 SV=2	4-coumarate--CoA ligase-like protein 9 [Aegilops tauschii]
TraesCS2A01G273000	8.69655	6.33026	6.67418	1.78742	0.725019	1.17806	5.4013e-23	-2.73266	down	--	CRT1-like GHKL ATPase [Hordeum vulgare]
TraesCS2A01G273100	16.4752	18.8983	16.4036	3.56157	2.46602	2.71708	1.55571e-53	-2.74924	down	Cysteine proteinase 1 (Precursor) GN=CCP1 OS=Zea mays (Maize) PE=2 SV=1	Cysteine proteinase 1 [Aegilops tauschii]
TraesCS2A01G273300	3.69275	3.54469	3.85347	0.187881	0.19537	0.260031	3.626e-76	-4.11656	down	--	predicted protein [Hordeum vulgare subsp. vulgare]
TraesCS2A01G273400	1.49685	1.68307	1.42718	0.136403	0.082694	0.04974	3.43223e-37	-3.98544	down	Ubiquitin thioesterase otubain-like GN=At1g28120 OS=Arabidopsis thaliana (Mouse-ear cress) PE=2 SV=2	RNA-binding protein 8A [Triticum urartu]
TraesCS2A01G273600	3.41453	3.37144	2.86451	0.139204	0.020566	0.08781	1.01403e-51	-5.20714	down	--	tRNA (adenine-N(1)-)-methyltransferase catalytic subunit trmt61a [Aegilops tauschii]
TraesCS2A01G273800	7.80291	9.6283	14.6629	0	0.0145	0	5.07955e-55	-9.60525	down	7-deoxyloganetin glucosyltransferase GN=UGT85A24 OS=Gardenia jasminoides (Cape jasmine) PE=1 SV=1	predicted protein [Hordeum vulgare subsp. vulgare]
TraesCS2A01G273900	10.1886	10.1799	8.36641	1.13394	0.874418	0.848688	4.82702e-52	-3.51257	down	50S ribosomal protein L27, chloroplastic {ECO:0000255|HAMAP-Rule:MF_00539} OS=Phaeodactylum tricornutum (strain CCAP 1055/1) PE=3 SV=1	50S ribosomal protein L27 [Triticum urartu]
TraesCS2A01G274000	1.09752	1.00363	1.13379	0.061409	0.041246	0.040538	2.63267e-46	-3.97614	down	Serine carboxypeptidase 1 chain B (Precursor) GN=CBP1 OS=Oryza sativa subsp. japonica (Rice) PE=2 SV=1	Os04g0321700 [Oryza sativa Japonica Group]
TraesCS2A01G274100	2.2479	2.07769	2.46676	0.368857	0.255355	0.17079	2.91004e-29	-3.22428	down	Probable protein phosphatase 2C 38 GN=OSJNBb0062H02.4 OS=Oryza sativa subsp. japonica (Rice) PE=2 SV=2	predicted protein [Hordeum vulgare subsp. vulgare]
TraesCS2A01G274200	8.75927	8.01265	8.02099	0.4653	0.321593	0.25229	1.83197e-74	-4.78315	down	--	predicted protein [Hordeum vulgare subsp. vulgare]
TraesCS2A01G274300	3.45886	4.55434	3.20013	0.592799	0.154923	0.102231	2.05678e-12	-3.66923	down	Lysozyme (Precursor) OS=Hevea brasiliensis (Para rubber tree) PE=1 SV=2	predicted protein [Hordeum vulgare subsp. vulgare]
TraesCS2A01G274400	5.76316	7.82107	7.01827	0.125923	0.22717	0.126687	2.21195e-44	-5.32956	down	--	hypothetical protein TRIUR3_17136 [Triticum urartu]
TraesCS2A01G274500	3.90546	3.86372	3.91445	0.140254	0.022217	0	4.05167e-08	-4.76882	down	Prolyl 4-hydroxylase 1 (Precursor) GN=P4H1 OS=Arabidopsis thaliana (Mouse-ear cress) PE=1 SV=1	predicted protein [Hordeum vulgare subsp. vulgare]
TraesCS2A01G274700	1.68158	1.61993	1.32619	0.137165	0	0.020586	1.70179e-13	-4.49236	down	Probable aldo-keto reductase 2 OS=Oryza sativa subsp. japonica (Rice) PE=2 SV=2	PREDICTED: probable aldo-keto reductase 2-like [Oryza brachyantha]
TraesCS2A01G274800	10.3088	11.6681	10.4627	1.3856	0.69267	0.985621	5.44487e-50	-3.54065	down	Probable aldo-keto reductase 2 OS=Oryza sativa subsp. japonica (Rice) PE=2 SV=2	PREDICTED: probable aldo-keto reductase 2-like [Oryza brachyantha]
TraesCS2A01G274900	14.8757	12.4733	11.2941	1.10903	0.712619	1.00439	4.65034e-128	-3.77957	down	Importin beta-like SAD2 {ECO:0000305} OS=Arabidopsis thaliana (Mouse-ear cress) PE=1 SV=1	predicted protein [Hordeum vulgare subsp. vulgare]
TraesCS2A01G275000	15.9972	19.9519	25.2378	0.894431	0.428087	0.330927	2.5881e-56	-5.34845	down	Aspartic proteinase-like protein 2 (Precursor) GN=At1g65240 OS=Arabidopsis thaliana (Mouse-ear cress) PE=1 SV=2	Aspartic proteinase-like protein 2 [Triticum urartu]
TraesCS2A01G275100	1.64993	1.57697	1.50024	0.178178	0.146661	0.041427	1.8466e-15	-3.42282	down	Protein PRD1 GN=PRD1 OS=Arabidopsis thaliana (Mouse-ear cress) PE=1 SV=3	hypothetical protein F775_04500 [Aegilops tauschii]
TraesCS2A01G275200	2.20287	2.10267	1.75439	0.233426	0.099779	0.083859	2.43638e-31	-3.87508	down	--	hypothetical protein TRIUR3_29275 [Triticum urartu]
TraesCS2A01G275400	1.1172	1.1245	1.14251	0	0	0.027851	4.34156e-30	-6.13951	down	--	hypothetical protein TRIUR3_13040 [Triticum urartu]
TraesCS2A01G275700	1.06215	1.17305	1.08388	0.104026	0.101901	0.062263	4.57191e-47	-3.76242	down	Kinesin-like protein KIN12B GN=MDB19.16 OS=Arabidopsis thaliana (Mouse-ear cress) PE=1 SV=1	PREDICTED: kinesin-like protein KIN12A [Brachypodium distachyon]
TraesCS2A01G275800	22.4771	20.0274	19.7668	1.82713	1.26838	1.15666	1.41629e-103	-4.04735	down	Probable UDP-N-acetylglucosamine--peptide N-acetylglucosaminyltransferase SEC GN=SEC OS=Arabidopsis thaliana (Mouse-ear cress) PE=2 SV=1	predicted protein [Hordeum vulgare subsp. vulgare]
TraesCS2A01G275900	4.71173	5.12462	3.48633	0.12542	0	0	1.0853e-24	-6.03217	down	Cysteine proteinase inhibitor 10 (Precursor) GN=OSJNBa0038P21.11 OS=Oryza sativa subsp. japonica (Rice) PE=2 SV=1	Cysteine proteinase inhibitor 10 [Aegilops tauschii]
TraesCS2A01G276100	220.11	217.605	189.619	24.877	14.5481	13.0505	1.39584e-52	-3.7321	down	40S ribosomal protein S8 OS=Oryza sativa subsp. japonica (Rice) PE=2 SV=2	40S ribosomal protein S8 [Aegilops tauschii]
TraesCS2A01G276200	1.35334	1.02436	1.13577	0.086187	0.015088	0.02374	3.36567e-17	-3.97505	down	U11/U12 small nuclear ribonucleoprotein 48 kDa protein GN=SNRNP48 OS=Arabidopsis thaliana (Mouse-ear cress) PE=2 SV=1	predicted protein [Hordeum vulgare subsp. vulgare]
TraesCS2A01G276300	1.74304	2.19644	1.96088	0.039494	0.056404	0.021517	2.99638e-34	-5.41264	down	--	predicted protein [Hordeum vulgare subsp. vulgare]
TraesCS2A01G276400	3.09086	3.06414	2.46515	0.206224	0.248673	0.127793	1.43879e-44	-3.98914	down	U-box domain-containing protein 9 GN=PUB9 OS=Arabidopsis thaliana (Mouse-ear cress) PE=1 SV=1	U-box domain-containing protein 9 [Triticum urartu]
TraesCS2A01G276800	3.4027	3.06365	3.11443	0.384957	0.193761	0.230718	6.3624e-45	-3.54286	down	Phospholipid-transporting ATPase 2 GN=ALA2 OS=Arabidopsis thaliana (Mouse-ear cress) PE=1 SV=1	PREDICTED: phospholipid-transporting ATPase 2-like [Brachypodium distachyon]
TraesCS2A01G277000	1.23539	1.04222	1.02683	0.029534	0	0.052842	1.23758e-30	-5.07253	down	Pentatricopeptide repeat-containing protein At5g50280, chloroplastic (Precursor) GN=EMB1006 OS=Arabidopsis thaliana (Mouse-ear cress) PE=2 SV=1	predicted protein [Hordeum vulgare subsp. vulgare]
TraesCS2A01G277100	64.4386	41.6721	45.0427	4.03112	2.15816	1.86655	7.87025e-49	-4.3556	down	70 kDa peptidyl-prolyl isomerase GN=FKBP70 OS=Triticum aestivum (Wheat) PE=1 SV=1	70 kDa peptidyl-prolyl isomerase [Triticum urartu]
TraesCS2A01G277500	1.29664	0.789575	1.02718	0.063893	0.132431	0.175127	3.7611e-28	-3.42908	down	Separase GN=F7H19.150 OS=Arabidopsis thaliana (Mouse-ear cress) PE=2 SV=1	PREDICTED: separase [Brachypodium distachyon]
TraesCS2A01G277900	36.3921	33.6059	34.825	1.94971	1.28153	0.854956	5.84078e-77	-4.80367	down	Putative quinone-oxidoreductase homolog, chloroplastic GN=At4g13010 OS=Arabidopsis thaliana (Mouse-ear cress) PE=2 SV=1	Putative quinone-oxidoreductase-like protein, chloroplastic [Aegilops tauschii]
TraesCS2A01G278000	9.76921	8.89154	15.2018	2.3669	1.12809	1.14203	8.78584e-44	-3.47909	down	--	Putative G3BP-like protein [Triticum urartu]
TraesCS2A01G278100	5.53836	5.84073	5.08476	0.07386	0.12986	0.145759	1.16195e-76	-5.38972	down	Probable magnesium transporter NIPA4 GN=At1g71900 OS=Arabidopsis thaliana (Mouse-ear cress) PE=2 SV=1	hypothetical protein F775_13280 [Aegilops tauschii]
TraesCS2A01G278400	4.21141	4.13696	4.15318	0.209863	0.174095	0.094002	4.78881e-70	-4.53601	down	MATE efflux family protein 5 GN=F3L12.12 OS=Arabidopsis thaliana (Mouse-ear cress) PE=3 SV=1	Protein TRANSPARENT TESTA 12 [Aegilops tauschii]
TraesCS2A01G278500	5.96523	6.20048	5.3973	0.623146	0.44093	0.534886	6.16419e-110	-3.88108	down	MATE efflux family protein 5 GN=F3L12.12 OS=Arabidopsis thaliana (Mouse-ear cress) PE=3 SV=1	MATE efflux family protein 5 [Triticum urartu]
TraesCS2A01G278600	132.921	143.064	118.755	15.5407	8.53648	7.97767	2.20509e-48	-3.76658	down	60S ribosomal protein L35-2 GN=RPL35B OS=Arabidopsis thaliana (Mouse-ear cress) PE=2 SV=1	60S ribosomal protein L35-2 [Aegilops tauschii]
TraesCS2A01G278700	9.68889	9.47381	9.12642	0.815903	0.700939	0.432007	3.06707e-64	-3.99119	down	--	predicted protein [Hordeum vulgare subsp. vulgare]
TraesCS2A01G278900	13.8461	11.867	14.7453	1.17516	1.12198	0.601069	1.97509e-82	-4.31404	down	3-oxoacyl-[acyl-carrier-protein] reductase 3, chloroplastic (Precursor) GN=bkr3 OS=Brassica napus (Rape) PE=2 SV=1	predicted protein [Hordeum vulgare subsp. vulgare]
TraesCS2A01G279000	0.98856	1.05578	1.17069	0.056373	0.086736	0.087302	7.95855e-50	-3.68871	down	--	hypothetical protein TRIUR3_32975 [Triticum urartu]
TraesCS2A01G279200	17.8358	17.5891	15.4961	2.28376	1.81042	1.42698	1.98424e-69	-3.402	down	Eukaryotic translation initiation factor 3 subunit H {ECO:0000255|HAMAP-Rule:MF_03007} GN=TIF3H1 OS=Arabidopsis thaliana (Mouse-ear cress) PE=1 SV=2	hypothetical protein F775_28513 [Aegilops tauschii]
TraesCS2A01G279300	6.09404	5.89336	5.07897	0.278808	0.116164	0.161362	1.40983e-70	-5.03513	down	Protein XRI1 GN=XRI1 OS=Arabidopsis thaliana (Mouse-ear cress) PE=1 SV=2	hypothetical protein TRIUR3_29987 [Triticum urartu]
TraesCS2A01G279600	94.2414	122.353	107.79	32.8159	16.4745	16.9514	2.48373e-18	-2.45547	down	GDSL esterase/lipase EXL3 (Precursor) GN=EXL3 OS=Arabidopsis thaliana (Mouse-ear cress) PE=2 SV=1	GDSL esterase/lipase EXL3 [Triticum urartu]
TraesCS2A01G279700	0.73014	0.804326	0.756434	0	0	0	1.81116e-15	-6.64027	down	Lysine histidine transporter 1 GN=LHT1 OS=Arabidopsis thaliana (Mouse-ear cress) PE=1 SV=1	hypothetical protein F775_21568 [Aegilops tauschii]
TraesCS2A01G279800	1.10136	1.92904	1.19281	0.058176	0.089918	0.096877	1.64303e-30	-3.95895	down	--	predicted protein [Hordeum vulgare subsp. vulgare]
TraesCS2A01G279900	10.5195	11.5773	9.92438	0.579756	0.174558	0.328932	5.52963e-58	-4.9063	down	Protein BOBBER 2 GN=BOB2 OS=Arabidopsis thaliana (Mouse-ear cress) PE=2 SV=1	predicted protein [Hordeum vulgare subsp. vulgare]
TraesCS2A01G280000	6.27573	2.83162	7.19293	0.417058	0.216375	0	0.00481184	-3.13681	down	--	PREDICTED: ankyrin repeat and SAM domain-containing protein 6-like [Brachypodium distachyon]
TraesCS2A01G280100	1.26671	1.28688	1.22159	0.123794	0.073559	0.044139	2.03545e-35	-4.01136	down	--	predicted protein [Hordeum vulgare subsp. vulgare]
TraesCS2A01G280500	1.29412	1.24216	1.70382	0.017245	0.035692	0	2.02079e-27	-5.7697	down	Violaxanthin de-epoxidase, chloroplastic (Precursor) OS=Arabidopsis thaliana (Mouse-ear cress) PE=1 SV=1	violaxanthin de-epoxidase [Triticum aestivum]
TraesCS2A01G280700	34.2634	34.0312	27.8503	4.34944	2.66314	3.04499	5.4028e-66	-3.51294	down	Acyl-[acyl-carrier-protein] desaturase 5, chloroplastic (Precursor) OS=Oryza sativa subsp. japonica (Rice) PE=2 SV=2	Acyl-[acyl-carrier-protein] desaturase 5, chloroplastic [Triticum urartu]
TraesCS2A01G280800	5.89893	5.51376	4.4423	0.40011	0.369784	0.318936	5.17335e-41	-3.66437	down	Uncharacterized protein At3g27210 GN=Y-2 OS=Arabidopsis thaliana (Mouse-ear cress) PE=1 SV=1	PREDICTED: uncharacterized protein At3g27210-like [Brachypodium distachyon]
TraesCS2A01G281000	5.10417	4.65648	4.15277	0.379006	0.244424	0.174493	3.3245e-61	-4.22733	down	Dynamin-related protein 3A GN=T16L1.140 OS=Arabidopsis thaliana (Mouse-ear cress) PE=1 SV=2	predicted protein [Hordeum vulgare subsp. vulgare]
TraesCS2A01G281100	1.39278	1.47679	1.59217	0.047117	0.011197	0.074841	1.5917e-33	-4.45703	down	Probable esterase PIR7A OS=Oryza sativa subsp. japonica (Rice) PE=3 SV=2	hypothetical protein TRIUR3_35229 [Triticum urartu]
TraesCS2A01G281400	1.69213	1.92698	2.14068	0.093834	0.019024	0	3.65842e-05	-4.05605	down	--	predicted protein [Hordeum vulgare subsp. vulgare]
TraesCS2A01G281500	6.8221	6.35592	5.95725	0.401813	0.257416	0.149321	1.67005e-63	-4.67363	down	SWI/SNF complex component SNF12 homolog GN=At5g14170 OS=Arabidopsis thaliana (Mouse-ear cress) PE=1 SV=1	predicted protein [Hordeum vulgare subsp. vulgare]
TraesCS2A01G281600	1.28117	1.33404	1.59753	0.032291	0.03905	0.012538	5.75423e-40	-5.42744	down	Exocyst complex component EXO70A1 GN=EXO70A1 OS=Arabidopsis thaliana (Mouse-ear cress) PE=1 SV=1	Exocyst complex component 7 [Aegilops tauschii]
TraesCS2A01G281700	2.00113	2.10755	2.03045	0.104279	0.155833	0.039969	8.20706e-36	-4.35529	down	SNF1-related protein kinase regulatory subunit gamma-1 GN=T8P19.40 OS=Arabidopsis thaliana (Mouse-ear cress) PE=1 SV=2	SnRK1 gamma subunit [Hordeum vulgare subsp. vulgare]
TraesCS2A01G281900	4.37727	5.11081	6.20317	0.113038	0.465227	0.167099	7.41965e-26	-4.35859	down	--	hypothetical protein TRIUR3_07062 [Triticum urartu]
TraesCS2A01G282100	7.58177	6.24221	6.52107	1.20602	0.879333	0.892235	1.23421e-64	-2.95825	down	Vacuolar protein-sorting-associated protein 11 homolog GN=VPS11 OS=Arabidopsis thaliana (Mouse-ear cress) PE=1 SV=1	Vacuolar sorting-associated protein 11-like protein [Aegilops tauschii]
TraesCS2A01G282300	1.55959	1.43629	1.80168	0.18958	0.154944	0.01878	7.55629e-12	-3.42614	down	F-box protein At1g67340 GN=At1g67340 OS=Arabidopsis thaliana (Mouse-ear cress) PE=1 SV=1	predicted protein [Hordeum vulgare subsp. vulgare]
TraesCS2A01G282800	2.82811	3.23615	3.02851	0.252427	0.084088	0.088158	7.28392e-39	-4.40763	down	--	hypothetical protein TRIUR3_24216 [Triticum urartu]
TraesCS2A01G282900	32.9027	30.7621	32.6498	0.970767	1.02103	1.0118	2.42367e-303	-5.17483	down	Carboxyvinyl-carboxyphosphonate phosphorylmutase, chloroplastic (Precursor) GN=At1g77060 OS=Arabidopsis thaliana (Mouse-ear cress) PE=2 SV=2	predicted protein [Hordeum vulgare subsp. vulgare]
TraesCS2A01G283100	0.761366	1.12374	0.724308	0.334474	0.139172	0.082916	1.80066e-05	-2.23852	down	--	--
TraesCS2A01G283300	2.07156	2.88782	2.63516	0.160141	0.219955	0.136182	1.34857e-45	-3.97098	down	Probable DNA primase large subunit GN=At1g67320 OS=Arabidopsis thaliana (Mouse-ear cress) PE=2 SV=2	predicted protein [Hordeum vulgare subsp. vulgare]
TraesCS2A01G283600	46.9786	48.8794	56.2051	1.42135	0.592273	1.61552	7.32283e-95	-5.45449	down	--	hypothetical protein F775_27729 [Aegilops tauschii]
TraesCS2A01G283800	3.76959	3.054	3.16229	0.332959	0.217154	0.085934	2.58045e-26	-3.99953	down	Calmodulin-binding transcription activator 4 GN=F1N21.13 OS=Arabidopsis thaliana (Mouse-ear cress) PE=1 SV=1	Calmodulin-binding transcription activator 1 [Triticum urartu]
TraesCS2A01G283900	3.4675	3.61681	2.99124	0.176925	0.291581	0.129474	5.47374e-27	-4.04516	down	Mediator of RNA polymerase II transcription subunit 30 GN=MLE2.11 OS=Arabidopsis thaliana (Mouse-ear cress) PE=1 SV=1	predicted protein [Hordeum vulgare subsp. vulgare]
TraesCS2A01G284100	0.730097	0.907392	0.58767	0	0.006527	0	1.61913e-18	-6.57971	down	--	hypothetical protein F775_14441 [Aegilops tauschii]
TraesCS2A01G284200	8.29516	8.3538	7.95514	0.519733	0.60659	0.827138	5.10511e-102	-3.83206	down	Chaperone protein dnaJ 49 OS=Arabidopsis thaliana (Mouse-ear cress) PE=2 SV=2	Chaperone protein dnaJ [Aegilops tauschii]
TraesCS2A01G284300	25.5975	27.6502	26.6983	3.26177	2.01159	1.49211	2.34331e-44	-3.69304	down	Sm-like protein LSM36B {ECO:0000305} OS=Arabidopsis thaliana (Mouse-ear cress) PE=1 SV=1	predicted protein [Hordeum vulgare subsp. vulgare]
TraesCS2A01G284400	42.0953	41.8633	43.9394	6.43515	4.09517	3.64724	2.86127e-52	-3.34048	down	--	predicted protein [Hordeum vulgare subsp. vulgare]
TraesCS2A01G284500	52.2655	62.5982	49.7005	3.94611	2.23491	2.21415	1.05645e-83	-4.57808	down	Copper transport protein ATX1 GN=ATX1 OS=Arabidopsis thaliana (Mouse-ear cress) PE=1 SV=1	hypothetical protein TRIUR3_25346 [Triticum urartu]
TraesCS2A01G284700	13.8141	10.6426	9.96413	0.408648	0.239125	0.246816	7.78485e-115	-5.35597	down	Probable metal-nicotianamine transporter YSL6 OS=Oryza sativa subsp. japonica (Rice) PE=2 SV=1	Putative metal-nicotianamine transporter YSL6 [Aegilops tauschii]
TraesCS2A01G285200	1.24913	1.10546	0.946968	0.090632	0.065997	0.110285	1.00165e-35	-3.64799	down	RecQ-mediated genome instability protein 1 GN=RMI1 OS=Oryza sativa subsp. japonica (Rice) PE=3 SV=2	hypothetical protein TRIUR3_18448 [Triticum urartu]
TraesCS2A01G285300	2.52456	3.02685	2.2594	0.249743	0.148109	0.062542	7.40982e-27	-4.09076	down	ACT domain-containing protein ACR4 {ECO:0000305} OS=Arabidopsis thaliana (Mouse-ear cress) PE=2 SV=1	predicted protein [Hordeum vulgare subsp. vulgare]
TraesCS2A01G285500	16.9449	19.7887	19.3451	2.12994	1.95056	2.24905	1.06299e-74	-3.32105	down	Membrane-anchored ubiquitin-fold protein 4 (Precursor) GN=OSJNBa0055C08.14 OS=Oryza sativa subsp. japonica (Rice) PE=2 SV=2	PREDICTED: membrane-anchored ubiquitin-fold protein 4-like [Oryza brachyantha]
TraesCS2A01G285700	9.20821	8.40186	9.51612	1.25785	1.55766	1.39254	1.07152e-94	-2.87278	down	Serine/threonine-protein kinase PBS1 GN=PBS1 OS=Arabidopsis thaliana (Mouse-ear cress) PE=1 SV=1	protein serine/threonine kinase [Triticum aestivum]
TraesCS2A01G285900	5.75819	4.95754	6.39551	0.054237	0.023545	0.093884	1.17617e-67	-6.47325	down	Glycerophosphodiester phosphodiesterase GDPD2 {ECO:0000305} OS=Arabidopsis thaliana (Mouse-ear cress) PE=2 SV=1	predicted protein [Hordeum vulgare subsp. vulgare]
TraesCS2A01G286000	0.762032	0.742648	0.728511	0.089863	0	0.043265	4.54473e-10	-3.80009	down	Uncharacterized protein At2g33490 GN=At2g33490 OS=Arabidopsis thaliana (Mouse-ear cress) PE=4 SV=2	hypothetical protein F775_06517 [Aegilops tauschii]
TraesCS2A01G286200	5.70238	6.19277	5.37406	0.483865	0.209117	0.220581	4.71318e-48	-4.3408	down	Transport inhibitor response 1-like protein Os04g0395600 OS=Oryza sativa subsp. japonica (Rice) PE=2 SV=1	PREDICTED: transport inhibitor response 1-like protein Os04g0395600 [Brachypodium distachyon]
TraesCS2A01G286300	0.868389	1.09223	0.557283	0.18876	0.045317	0.180023	2.26961e-07	-2.37603	down	--	hypothetical protein TRIUR3_31755 [Triticum urartu]
TraesCS2A01G286500	2.59598	2.47969	2.07283	0.192041	0.140474	0.136446	1.4172e-101	-4.12038	down	Probable phosphoribosylformylglycinamidine synthase, chloroplastic/mitochondrial (Precursor) GN=At1g74260 OS=Arabidopsis thaliana (Mouse-ear cress) PE=2 SV=3	Putative phosphoribosylformylglycinamidine synthase, chloroplastic [Aegilops tauschii]
TraesCS2A01G286600	6.53435	7.83649	5.29569	0.649741	0.377933	0.263572	2.5883e-36	-4.01288	down	--	PREDICTED: histone H2A.Z-specific chaperone CHZ1 [Brachypodium distachyon]
TraesCS2A01G286700	6.53518	6.09316	2.76465	1.03189	0.370478	0.608045	2.20822e-12	-2.79639	down	Protein TIFY 9 GN=T31B5.40 OS=Arabidopsis thaliana (Mouse-ear cress) PE=1 SV=1	hypothetical protein TRIUR3_32334 [Triticum urartu]
TraesCS2A01G286800	3.31698	2.49264	3.21851	0.316316	0.254162	0.338384	2.23592e-48	-3.4693	down	--	PREDICTED: uncharacterized protein LOC100821667 [Brachypodium distachyon]
TraesCS2A01G287100	2.63829	2.7682	2.71767	0.078085	0.015661	0.014908	9.12409e-53	-6.09674	down	Serine carboxypeptidase-like 45 (Precursor) GN=SCPL45 OS=Arabidopsis thaliana (Mouse-ear cress) PE=2 SV=1	Serine carboxypeptidase-like 45 [Triticum urartu]
TraesCS2A01G287300	30.0541	29.421	17.4028	2.76899	2.0466	1.75632	8.62663e-50	-3.75812	down	Chaperone protein ClpC1, chloroplastic (Precursor) GN=OSJNBa0039C07.4 OS=Oryza sativa subsp. japonica (Rice) PE=2 SV=2	PREDICTED: chaperone protein ClpC1, chloroplastic-like [Zea mays]
TraesCS2A01G287400	0.961969	1.47431	0.895697	0.134453	0.116487	0.030572	3.6419e-15	-3.42178	down	--	hypothetical protein TRIUR3_32716 [Triticum urartu]
TraesCS2A01G287500	4.48797	4.09611	3.40681	0.376391	0.156549	0.107149	5.6472e-31	-4.29992	down	--	hypothetical protein F775_17074 [Aegilops tauschii]
TraesCS2A01G287700	1.13572	1.92761	1.85833	0.103433	0.089051	0.056588	3.09087e-25	-3.89791	down	Protein DYAD GN=MFG13.3 OS=Arabidopsis thaliana (Mouse-ear cress) PE=1 SV=2	hypothetical protein TRIUR3_07063 [Triticum urartu]
TraesCS2A01G287800	5.10782	5.48801	4.44749	0.091203	0	0.288975	2.75519e-26	-5.01845	down	--	Centromere protein S [Triticum urartu]
TraesCS2A01G287900	20.3932	18.7258	15.8693	1.78768	1.55986	1.29176	1.67808e-110	-3.9628	down	Protein MEI2-like 4 OS=Oryza sativa subsp. japonica (Rice) PE=2 SV=1	Mei2-like protein [Hordeum vulgare subsp. vulgare]
TraesCS2A01G288100	5.63678	5.02954	5.42392	0.504801	0.215763	0.161809	1.15249e-48	-4.27341	down	Glycine--tRNA ligase 1, mitochondrial (Precursor) GN=GLYRS-1 OS=Arabidopsis thaliana (Mouse-ear cress) PE=2 SV=1	hypothetical protein SORBIDRAFT_06g014710 [Sorghum bicolor]
TraesCS2A01G288200	128.258	142.954	123.063	16.8591	13.4738	11.7329	5.373e-94	-3.41403	down	Cytochrome b-c1 complex subunit Rieske, mitochondrial (Precursor) OS=Zea mays (Maize) PE=2 SV=1	predicted protein [Hordeum vulgare subsp. vulgare]
TraesCS2A01G288300	6.46691	6.68774	6.89486	0.582479	0.555811	0.308363	3.32248e-75	-3.96342	down	Probable glucuronosyltransferase Os04g0398600 OS=Oryza sativa subsp. japonica (Rice) PE=2 SV=2	PREDICTED: probable glucuronosyltransferase Os04g0398600 [Brachypodium distachyon]
TraesCS2A01G288400	260.332	342.342	298.183	38.4368	19.6104	17.29	2.74561e-36	-3.71095	down	Pollen-specific protein C13 (Precursor) GN=MGS1 OS=Zea mays (Maize) PE=2 SV=1	pollen-specific protein F8-4 [Secale cereale x Triticum turgidum subsp. durum]
TraesCS2A01G288900	2.12226	2.66596	1.32952	0	0	0	1.52548e-18	-7.17052	down	--	hypothetical protein F775_25225 [Aegilops tauschii]
TraesCS2A01G289200	5.90741	6.32033	5.8808	0.895125	0.788888	0.40593	1.07609e-32	-2.84039	down	Sucrose nonfermenting 4-like protein GN=F7G19.11 OS=Arabidopsis thaliana (Mouse-ear cress) PE=1 SV=1	PREDICTED: sucrose nonfermenting 4-like protein [Brachypodium distachyon]
TraesCS2A01G289300	15.4289	16.3485	14.3141	2.00993	1.22987	1.1506	1.0185e-55	-3.50555	down	Potassium transporter 1 OS=Oryza sativa subsp. japonica (Rice) PE=1 SV=2	Potassium transporter 1 [Aegilops tauschii]
TraesCS2A01G289600	1.22802	1.08445	1.03758	0.044348	0.030281	0.077685	2.84094e-27	-4.12398	down	DNA cross-link repair protein SNM1 GN=SNM1 OS=Arabidopsis thaliana (Mouse-ear cress) PE=2 SV=1	PREDICTED: DNA cross-link repair protein SNM1 isoform X1 [Brachypodium distachyon]
TraesCS2A01G289800	3.61456	3.21586	4.10623	0.290142	0.170872	0.15234	7.49034e-55	-4.10485	down	Probable alpha-amylase 2 GN=AMY2 OS=Arabidopsis thaliana (Mouse-ear cress) PE=2 SV=1	Alpha-amylase [Triticum urartu]
TraesCS2A01G290000	23.8068	24.8527	22.5158	1.54923	0.880842	0.693182	2.46951e-67	-4.63012	down	Probable BOI-related E3 ubiquitin-protein ligase 3 GN=BRG3 OS=Arabidopsis thaliana (Mouse-ear cress) PE=1 SV=1	hypothetical protein TRIUR3_32073 [Triticum urartu]
TraesCS2A01G290100	41.9586	40.16	46.7648	1.01212	0.67589	0.970456	7.0266e-237	-5.7459	down	Probable BOI-related E3 ubiquitin-protein ligase 3 GN=BRG3 OS=Arabidopsis thaliana (Mouse-ear cress) PE=1 SV=1	hypothetical protein F775_07805 [Aegilops tauschii]
TraesCS2A01G290200	3.99932	4.08995	3.5478	0.645067	0.810844	0.339576	2.47809e-40	-3.12055	down	--	predicted protein [Hordeum vulgare subsp. vulgare]
TraesCS2A01G290300	8.01541	8.02981	7.41197	0.704193	0.175181	0.411152	5.62545e-33	-4.1988	down	Uncharacterized protein At1g32220, chloroplastic (Precursor) GN=At1g32220 OS=Arabidopsis thaliana (Mouse-ear cress) PE=2 SV=1	predicted protein [Hordeum vulgare subsp. vulgare]
TraesCS2A01G290500	1.04313	1.04066	0.932985	0.259576	0.136366	0.131514	1.50602e-18	-2.52891	down	Probable protein phosphatase 2C 39 OS=Oryza sativa subsp. japonica (Rice) PE=2 SV=2	putative protein phosphatase 2C 39 [Triticum urartu]
TraesCS2A01G290900	15.1525	12.8571	16.2164	1.15938	0.505377	0.881277	2.06319e-34	-4.10969	down	Acetyl-coenzyme A synthetase, chloroplastic/glyoxysomal (Precursor) GN=ACS OS=Arabidopsis thaliana (Mouse-ear cress) PE=1 SV=1	predicted protein [Hordeum vulgare subsp. vulgare]
TraesCS2A01G291000	6.6601	6.51977	5.70612	0.717151	0.516314	0.499881	3.79118e-53	-3.73597	down	--	predicted protein [Hordeum vulgare subsp. vulgare]
TraesCS2A01G291100	2.44702	2.36223	2.31307	0.134978	0.080314	0.090732	1.01425e-89	-4.47867	down	Chaperone protein ClpD2, chloroplastic (Precursor) GN=OJ000315_02.14 OS=Oryza sativa subsp. japonica (Rice) PE=2 SV=2	predicted protein [Hordeum vulgare subsp. vulgare]
TraesCS2A01G291200	17.4933	19.2404	18.3189	1.58642	0.723427	0.642714	1.86148e-45	-4.32046	down	--	predicted protein [Hordeum vulgare subsp. vulgare]
TraesCS2A01G291400	3.80254	4.57264	4.7585	0.473844	0.435799	0.357789	1.74469e-50	-3.5311	down	--	predicted protein [Hordeum vulgare subsp. vulgare]
TraesCS2A01G291500	2.87527	2.95366	2.24431	0.359384	0.307649	0.008021	8.01138e-10	-3.57059	down	--	predicted protein [Hordeum vulgare subsp. vulgare]
TraesCS2A01G291600	0.882987	1.26782	1.27763	0.182852	0.106054	0.104796	1.14464e-15	-3.15534	down	UPF0496 protein At3g19330 GN=At3g19330 OS=Arabidopsis thaliana (Mouse-ear cress) PE=2 SV=2	PREDICTED: UPF0496 protein At3g19330-like isoform X1 [Brachypodium distachyon]
TraesCS2A01G291700	2.67054	2.76474	1.7352	0.223872	0.030726	0.033379	2.3573e-15	-4.42509	down	Trihelix transcription factor ASIL2 {ECO:0000305} OS=Arabidopsis thaliana (Mouse-ear cress) PE=2 SV=1	PREDICTED: uncharacterized protein LOC100840998 isoform X1 [Brachypodium distachyon]
TraesCS2A01G292000	4.23534	5.31814	5.49357	1.037	0.617947	0.666164	8.67722e-29	-2.84806	down	Arogenate dehydratase/prephenate dehydratase 6, chloroplastic (Precursor) GN=T23G18.10 OS=Arabidopsis thaliana (Mouse-ear cress) PE=1 SV=1	Arogenate dehydratase/prephenate dehydratase 6, chloroplastic [Triticum urartu]
TraesCS2A01G292100	6.89572	6.39394	6.36052	0.329694	0.250082	0.139212	6.45597e-93	-4.86065	down	Histidinol dehydrogenase, chloroplastic (Precursor) GN=P0702F03.3 OS=Oryza sativa subsp. japonica (Rice) PE=2 SV=1	Histidinol dehydrogenase, chloroplastic [Triticum urartu]
TraesCS2A01G292300	1.95295	3.11618	3.49268	0.021592	0	0.021462	7.56176e-33	-6.61734	down	--	predicted protein [Hordeum vulgare subsp. vulgare]
TraesCS2A01G292400	43.0763	45.0538	35.1872	0.482055	0.460605	0.432882	0	-6.6278	down	Cytochrome P450 77A4 GN=CYP77A4 OS=Arabidopsis thaliana (Mouse-ear cress) PE=2 SV=1	cytochrome P450 [Saccharum hybrid cultivar R570]
TraesCS2A01G292600	6.34932	6.50014	3.84592	0.568301	0.488338	0.371835	3.52619e-26	-3.62863	down	--	hypothetical protein [Triticum aestivum]
TraesCS2A01G292700	32.2574	38.5566	29.7996	2.25399	1.12976	1.26671	2.93224e-69	-4.57154	down	DNA-binding protein S1FA2 OS=Oryza sativa subsp. japonica (Rice) PE=3 SV=2	DNA-binding protein S1FA [Triticum aestivum]
TraesCS2A01G292900	11.1977	10.122	9.40831	0.697746	0.434188	0.30105	6.39872e-64	-4.58116	down	Neutral/alkaline invertase 3, chloroplastic {ECO:0000305} (Precursor) OS=Oryza sativa subsp. japonica (Rice) PE=2 SV=1	hypothetical protein TRIUR3_16260 [Triticum urartu]
TraesCS2A01G293200	2.51531	2.13686	2.01218	0.529151	0.125416	0.182814	1.28518e-16	-3.40327	down	Histone deacetylase 9 GN=HDA9 OS=Arabidopsis thaliana (Mouse-ear cress) PE=2 SV=1	histone deacetylase RPD3/HDA1 class I isoform 1 [Hordeum vulgare]
TraesCS2A01G293300	10.8924	11.7407	10.0215	0.915916	0.731457	0.658876	7.35e-106	-3.98896	down	--	predicted protein [Hordeum vulgare subsp. vulgare]
TraesCS2A01G293400	13.8684	13.4617	12.7526	1.98392	1.11412	1.22838	6.77563e-53	-3.47665	down	1,4-alpha-glucan-branching enzyme 1, chloroplastic/amyloplastic (Precursor) GN=SBEI OS=Pisum sativum (Garden pea) PE=1 SV=1	starch branching enzyme IIa [Triticum aestivum]
TraesCS2A01G293500	2.88838	2.61191	2.71207	0.355544	0.050607	0.203061	5.11131e-17	-3.73908	down	RNA polymerase II C-terminal domain phosphatase-like 4 GN=CPL4 OS=Arabidopsis thaliana (Mouse-ear cress) PE=1 SV=1	RNA polymerase II C-terminal domain phosphatase-like 4 [Triticum urartu]
TraesCS2A01G293700	210.085	195.841	215.433	23.9125	12.8449	14.1921	1.10792e-39	-3.61988	down	ATP synthase subunit d, mitochondrial GN=At3g52300 OS=Arabidopsis thaliana (Mouse-ear cress) PE=1 SV=3	ATP synthase subunit d, mitochondrial [Aegilops tauschii]
TraesCS2A01G293900	1.89249	2.36157	1.63976	0.184597	0.044093	0.013646	1.56794e-10	-3.85882	down	--	hypothetical protein F775_29199 [Aegilops tauschii]
TraesCS2A01G294000	64.2324	64.451	53.1527	7.104	5.36256	3.95915	1.77605e-61	-3.6331	down	60S acidic ribosomal protein P2A GN=RPP2A OS=Zea mays (Maize) PE=1 SV=3	Chain s, Localization Of The Large Subunit Ribosomal Proteins Into A 5.5 A Cryo-em Map Of Triticum Aestivum Translating 80s Ribosome
TraesCS2A01G294400	3.08903	3.33915	2.41391	0.476798	0.180097	0.198927	3.65504e-20	-3.43599	down	--	hypothetical protein TRIUR3_34911 [Triticum urartu]
TraesCS2A01G294500	5.99011	3.39153	5.11944	0.086271	0.059761	0.063934	1.48384e-73	-5.87184	down	Cell division protein FtsZ homolog 2-1, chloroplastic (Precursor) GN=FTSZ2-1 OS=Arabidopsis thaliana (Mouse-ear cress) PE=1 SV=2	Cell division protein ftsZ-like protein 2-1, chloroplastic [Triticum urartu]
TraesCS2A01G294700	2.04874	2.01419	1.49158	0.094476	0.052916	0.083102	3.77582e-48	-4.56004	down	Glucan endo-1,3-beta-glucosidase 14 (Precursor) GN=At2g27500 OS=Arabidopsis thaliana (Mouse-ear cress) PE=1 SV=2	predicted protein [Hordeum vulgare subsp. vulgare]
TraesCS2A01G295100	2.43994	2.32449	2.31828	0.063071	0.072413	0.136227	4.89986e-56	-4.59303	down	Protein transport protein Sec24-like At3g07100 GN=At3g07100 OS=Arabidopsis thaliana (Mouse-ear cress) PE=2 SV=2	predicted protein [Hordeum vulgare subsp. vulgare]
TraesCS2A01G295200	2.02402	1.99606	2.01957	0.146298	0.082869	0.170956	1.06841e-51	-3.63555	down	ABC transporter B family member 29, chloroplastic (Precursor) GN=F8F6.120 OS=Arabidopsis thaliana (Mouse-ear cress) PE=2 SV=1	ABC transporter B family member 29, chloroplastic [Triticum urartu]
TraesCS2A01G295300	9.86759	14.4404	10.2381	0.955593	0.358028	0.296517	3.10467e-30	-4.43675	down	--	hypothetical protein TRIUR3_34065 [Triticum urartu]
TraesCS2A01G295400	113.22	127.248	115.38	7.66665	4.04675	3.64024	2.79704e-75	-4.79482	down	Beta-fructofuranosidase, insoluble isoenzyme 2 (Precursor) OS=Oryza sativa subsp. japonica (Rice) PE=1 SV=1	cell wall invertase [Triticum aestivum]
TraesCS2A01G295600	74.7567	77.5945	79.6093	12.4257	10.3466	9.65811	2.07931e-107	-3.03248	down	40S ribosomal protein S14 OS=Zea mays (Maize) PE=1 SV=1	PREDICTED: 40S ribosomal protein S14 [Brachypodium distachyon]
TraesCS2A01G295700	1.88449	1.58158	1.38093	0.136424	0.118712	0.137199	2.53199e-28	-3.6826	down	--	predicted protein [Hordeum vulgare subsp. vulgare]
TraesCS2A01G295800	6.49452	6.54764	6.24722	0.839354	0.282037	0.424684	1.11151e-29	-3.82167	down	Mitochondrial fission protein ELM1 GN=ELM1 OS=Arabidopsis thaliana (Mouse-ear cress) PE=1 SV=1	predicted protein [Hordeum vulgare subsp. vulgare]
TraesCS2A01G295900	15.0051	13.5964	15.5584	1.14826	1.45492	1.23561	9.55334e-168	-3.7002	down	--	hypothetical protein TRIUR3_34891 [Triticum urartu]
TraesCS2A01G296000	37.5478	33.8293	35.2117	2.81685	1.02445	1.55698	3.38397e-46	-4.3759	down	60S ribosomal protein L5-1 OS=Oryza sativa subsp. japonica (Rice) PE=2 SV=1	60S ribosomal protein L5 [Triticum aestivum]
TraesCS2A01G296100	2.8615	2.59022	2.91522	0.241296	0.308673	0.113091	1.02748e-22	-3.66094	down	Glycine-rich RNA-binding protein 4, mitochondrial (Precursor) GN=At3g23830 OS=Arabidopsis thaliana (Mouse-ear cress) PE=2 SV=1	PREDICTED: glycine-rich RNA-binding protein 4, mitochondrial-like [Brachypodium distachyon]
TraesCS2A01G296400	50.5645	51.3226	59.2684	0.048115	0.079888	0	4.32081e-88	-9.42052	down	Photosystem I subunit O (Precursor) GN=PSAO OS=Arabidopsis thaliana (Mouse-ear cress) PE=1 SV=1	salt stress-responsive protein [Triticum aestivum]
TraesCS2A01G296800	6.21092	7.21617	7.86524	1.00218	0.118691	0.164773	1.1118e-11	-3.85809	down	HVA22-like protein i GN=HVA22I OS=Arabidopsis thaliana (Mouse-ear cress) PE=2 SV=2	PREDICTED: putative HVA22-like protein g isoform X1 [Brachypodium distachyon]
TraesCS2A01G297300	59.3739	28.9273	31.7968	0.764716	0.979726	1.02171	6.8125e-88	-5.55325	down	--	hypothetical protein F775_29621 [Aegilops tauschii]
TraesCS2A01G297400	1.21264	0.925496	0.950239	0	0	0.01211	2.78716e-25	-6.51261	down	Transcription factor E2FA GN=F11F19.8 OS=Arabidopsis thaliana (Mouse-ear cress) PE=1 SV=1	predicted protein [Hordeum vulgare subsp. vulgare]
TraesCS2A01G297500	50.3858	38.5345	59.1807	3.79059	3.23234	2.12531	6.04708e-59	-4.20793	down	2-Cys peroxiredoxin BAS1, chloroplastic (Precursor; Fragment) GN=BAS1 OS=Hordeum vulgare (Barley) PE=2 SV=1	predicted protein [Hordeum vulgare subsp. vulgare]
TraesCS2A01G297700	53.1389	62.7185	42.35	4.46206	4.58123	5.08214	5.4065e-93	-3.66546	down	Protein YLS9 GN=F11F19.11 OS=Arabidopsis thaliana (Mouse-ear cress) PE=2 SV=1	hypothetical protein F775_27232 [Aegilops tauschii]
TraesCS2A01G297800	5.09538	4.17509	3.80148	0.202822	0.123491	0.021955	8.19176e-11	-4.63349	down	Digalactosyldiacylglycerol synthase 1, chloroplastic (Precursor) GN=DGD1 OS=Lotus japonicus (Lotus corniculatus var. japonicus) PE=2 SV=1	predicted protein [Hordeum vulgare subsp. vulgare]
TraesCS2A01G298100	1.21783	1.425	1.72746	0.150447	0.055323	0	1.66657e-12	-4.12882	down	Protein MKS1 GN=MKS1 OS=Arabidopsis thaliana (Mouse-ear cress) PE=1 SV=2	predicted protein [Hordeum vulgare subsp. vulgare]
TraesCS2A01G298200	4.75825	4.20746	5.3262	0.24146	0.152291	0.097509	2.50363e-95	-4.74457	down	Guanine nucleotide-binding protein subunit beta GN=GB1 OS=Zea mays (Maize) PE=2 SV=1	hypothetical protein F775_16042 [Aegilops tauschii]
TraesCS2A01G298600	3.24531	1.9574	3.08122	0.295418	0.105342	0.152806	1.89652e-26	-3.93646	down	U-box domain-containing protein 29 GN=PUB29 OS=Arabidopsis thaliana (Mouse-ear cress) PE=1 SV=1	predicted protein [Hordeum vulgare subsp. vulgare]
TraesCS2A01G298800	25.8157	28.4282	25.6745	3.79125	2.12239	2.02657	4.51036e-45	-3.48562	down	Serine decarboxylase 1 OS=Oryza sativa subsp. japonica (Rice) PE=3 SV=1	Histidine decarboxylase [Triticum urartu]
TraesCS2A01G299100	9.09724	8.79531	7.63856	0.09961	0.117884	0	1.17511e-41	-6.44343	down	Histone H3.2 OS=Triticum aestivum (Wheat) PE=1 SV=2	hypothetical protein CARUB_v10021660mg, partial [Capsella rubella]
TraesCS2A01G299800	8.94345	8.67787	9.24097	0.738065	0.596797	0.334198	1.69694e-77	-4.1098	down	--	predicted protein [Hordeum vulgare subsp. vulgare]
TraesCS2A01G300000	0.643486	1.04237	0.65941	0.060396	0.046638	0.036481	1.6699e-39	-3.86451	down	--	unnamed protein product [Triticum aestivum]
TraesCS2A01G300100	9.78596	9.87671	10.1682	1.39567	1.89152	1.22479	1.33961e-52	-2.74417	down	Exocyst complex component SEC5B GN=SEC5B OS=Arabidopsis thaliana (Mouse-ear cress) PE=1 SV=1	predicted protein [Hordeum vulgare subsp. vulgare]
TraesCS2A01G300200	1.22488	1.2853	1.96713	0.032992	0	0.016425	3.76496e-24	-5.60922	down	Probable plastid-lipid-associated protein 7, chloroplastic (Precursor) GN=MYH9.3 OS=Arabidopsis thaliana (Mouse-ear cress) PE=2 SV=1	predicted protein [Hordeum vulgare subsp. vulgare]
TraesCS2A01G300700	1.46981	0.980604	1.90503	0.02288	0.048934	0	5.23859e-19	-5.10956	down	--	hypothetical protein F775_23997 [Aegilops tauschii]
TraesCS2A01G300800	0.970304	1.33879	1.17887	0.204912	0.020263	0.018835	1.27989e-08	-3.54058	down	Zeaxanthin epoxidase, chloroplastic (Precursor) GN=ZEP OS=Oncidium hybrid cultivar (Orchid) PE=2 SV=1	predicted protein [Hordeum vulgare subsp. vulgare]
TraesCS2A01G301000	4.71185	6.15925	2.81723	0.384476	0.17309	0.282636	3.67458e-27	-4.06522	down	Peroxidase 72 (Precursor) OS=Arabidopsis thaliana (Mouse-ear cress) PE=1 SV=1	Peroxidase 72 [Aegilops tauschii]
TraesCS2A01G301100	7.72849	6.33662	6.57834	0.767946	0.691459	0.583876	9.03188e-81	-3.51103	down	--	hypothetical protein F775_29609 [Aegilops tauschii]
TraesCS2A01G301900	15.8351	16.8173	14.8224	0.788864	1.06364	1.08052	6.46327e-105	-4.17153	down	COP9 signalosome complex subunit 8 GN=dl3095c OS=Arabidopsis thaliana (Mouse-ear cress) PE=1 SV=1	hypothetical protein F775_26148 [Aegilops tauschii]
TraesCS2A01G302000	11.0483	11.2966	13.0816	0.421133	0.090205	0.205915	9.23355e-56	-5.55324	down	--	Ribonuclease P protein subunit p25 [Aegilops tauschii]
TraesCS2A01G302100	3.16184	2.81058	3.11632	0.19959	0.148005	0.057477	3.40915e-42	-4.37073	down	Histone-lysine N-methyltransferase ASHH1 GN=F28O16.8 OS=Arabidopsis thaliana (Mouse-ear cress) PE=1 SV=1	Histone-lysine N-methyltransferase ASHH1 [Aegilops tauschii]
TraesCS2A01G302200	2.27436	2.4547	2.27046	0.267183	0.116732	0.036039	7.85816e-24	-4.1693	down	Ubiquitin carboxyl-terminal hydrolase 27 GN=UBP27 OS=Arabidopsis thaliana (Mouse-ear cress) PE=2 SV=1	Ubiquitin carboxyl-terminal hydrolase 27 [Aegilops tauschii]
TraesCS2A01G302300	15.6782	17.4919	14.7428	1.60505	1.20748	0.948355	2.18375e-77	-3.82737	down	Cellulose synthase-like protein H1 GN=OSJNBa0035F15.9 OS=Oryza sativa subsp. japonica (Rice) PE=2 SV=2	cellulose synthase-like protein H1 [Hordeum vulgare subsp. vulgare]
TraesCS2A01G302400	8.24233	7.36974	7.22959	0.759408	0.428502	0.551251	2.07332e-76	-3.87112	down	--	predicted protein [Hordeum vulgare subsp. vulgare]
TraesCS2A01G302500	4.78576	7.3599	7.92579	0.921251	0.471658	0.380633	6.46244e-34	-3.7784	down	Probable serine/threonine-protein kinase At1g01540 GN=At1g01540 OS=Arabidopsis thaliana (Mouse-ear cress) PE=1 SV=2	Putative serine/threonine-protein kinase [Aegilops tauschii]
TraesCS2A01G302600	41.5415	49.0432	39.0139	5.20097	3.36164	2.5881	3.21581e-47	-3.68487	down	40S ribosomal protein S10 GN=OSJNBa0042L16.19 OS=Oryza sativa subsp. japonica (Rice) PE=2 SV=2	hypothetical protein F775_27685 [Aegilops tauschii]
TraesCS2A01G302900	15.6594	14.4149	13.7194	0.169781	0.325021	0.099321	2.89694e-110	-6.01965	down	--	predicted protein [Hordeum vulgare subsp. vulgare]
TraesCS2A01G303200	1.55378	1.6949	1.86036	0.027437	0.085199	0	1.68417e-19	-4.72317	down	Thioredoxin M3, chloroplastic (Precursor) GN=OSJNBa0084A10.3 OS=Oryza sativa subsp. japonica (Rice) PE=2 SV=4	predicted protein [Hordeum vulgare subsp. vulgare]
TraesCS2A01G303300	4.89156	4.31873	4.92797	0.439378	0.294863	0.203818	6.45662e-66	-4.14786	down	--	hypothetical protein F775_32048 [Aegilops tauschii]
TraesCS2A01G303400	5.72465	5.97356	5.83146	0.21575	0.121273	0.07826	1.23646e-66	-5.40859	down	--	Protein grpE [Aegilops tauschii]
TraesCS2A01G303500	10.7034	11.222	9.79184	0.527467	0.275976	0.372213	1.51868e-102	-4.88779	down	F-box protein 7 GN=F8K7.20 OS=Arabidopsis thaliana (Mouse-ear cress) PE=1 SV=1	predicted protein [Hordeum vulgare subsp. vulgare]
TraesCS2A01G303600	13.58	17.3108	15.4939	1.19799	0.641583	0.30414	2.42347e-34	-4.46095	down	Acetyltransferase At1g77540 GN=At1g77540 OS=Arabidopsis thaliana (Mouse-ear cress) PE=1 SV=2	hypothetical protein TRIUR3_16292 [Triticum urartu]
TraesCS2A01G303800	1.20165	0.916048	0.986373	0.109605	0.064352	0.023346	2.02419e-24	-3.97091	down	--	hypothetical protein TRIUR3_19979 [Triticum urartu]
TraesCS2A01G303900	15.5776	13.7967	12.2721	0.681551	0.193775	0.499899	5.69992e-55	-4.90704	down	Serine/threonine-protein kinase SAPK7 OS=Oryza sativa subsp. japonica (Rice) PE=2 SV=2	Serine/threonine-protein kinase SAPK7 [Aegilops tauschii]
TraesCS2A01G304000	0.792122	1.1239	0.816007	0.0257	0	0.053098	2.53593e-18	-4.76289	down	Scarecrow-like protein 23 GN=SCL23 OS=Arabidopsis thaliana (Mouse-ear cress) PE=1 SV=1	PREDICTED: scarecrow-like protein 23 [Brachypodium distachyon]
TraesCS2A01G304100	3.37568	3.30525	3.63146	0.637682	0.376347	0.264027	3.68729e-25	-3.0384	down	Probable pre-mRNA-splicing factor ATP-dependent RNA helicase GN=At3g26560 OS=Arabidopsis thaliana (Mouse-ear cress) PE=1 SV=2	PREDICTED: ATP-dependent RNA helicase DHX36-like isoform X1 [Brachypodium distachyon]
TraesCS2A01G304300	12.0211	12.9968	10.0344	1.5419	0.98985	0.648374	5.35773e-35	-3.58574	down	Protein disulfide isomerase-like 5-2 (Precursor) GN=OSJNBa0084A10.17 OS=Oryza sativa subsp. japonica (Rice) PE=2 SV=2	putative PDI-like protein [Triticum aestivum]
TraesCS2A01G304400	122.798	152.461	136.316	28.8767	18.347	18.5862	4.37191e-40	-2.82262	down	--	predicted protein [Hordeum vulgare subsp. vulgare]
TraesCS2A01G304600	1.61514	1.95282	1.85918	0.108916	0.088461	0.099948	3.39288e-47	-4.1379	down	Protein EI24 homolog GN=At4g06676 OS=Arabidopsis thaliana (Mouse-ear cress) PE=2 SV=1	PREDICTED: protein EI24 homolog [Brachypodium distachyon]
TraesCS2A01G304700	2.37592	2.67605	2.06609	0.052066	0.097435	0.025877	3.59719e-34	-5.05911	down	--	predicted protein [Hordeum vulgare subsp. vulgare]
TraesCS2A01G304800	1.67595	1.26277	1.32296	0	0.063122	0.009248	1.76107e-05	-4.14231	down	--	predicted protein [Hordeum vulgare subsp. vulgare]
TraesCS2A01G304900	1.54541	1.32822	1.14685	0.25043	0.22923	0.058948	6.88504e-25	-3.29437	down	ATP-dependent DNA helicase Q-like 4A GN=At1g10930 OS=Arabidopsis thaliana (Mouse-ear cress) PE=2 SV=1	PREDICTED: ATP-dependent DNA helicase Q-like 4A [Brachypodium distachyon]
TraesCS2A01G305000	0.751427	0.750795	0.801485	0.072266	0.039563	0.089049	2.08988e-39	-3.62529	down	Protein CHROMATIN REMODELING 4 {ECO:0000303|PubMed:16547115} OS=Arabidopsis thaliana (Mouse-ear cress) PE=2 SV=1	hypothetical protein TRIUR3_33277 [Triticum urartu]
TraesCS2A01G305200	2.76241	2.66188	2.6756	0.264036	0.045674	0.116654	4.16657e-23	-4.15436	down	CDK5RAP1-like protein GN=OSJNBa0074L11 OS=Oryza sativa subsp. japonica (Rice) PE=2 SV=1	CDK5 regulatory subunit-associated protein 1-like protein 1 [Aegilops tauschii]
TraesCS2A01G305400	3.91742	3.11242	6.13856	0	0.108091	0.023393	9.86495e-31	-6.17766	down	Zinc-finger homeodomain protein 8 OS=Oryza sativa subsp. japonica (Rice) PE=3 SV=1	predicted protein [Hordeum vulgare subsp. vulgare]
TraesCS2A01G305500	1.05371	0.940806	0.945675	0.099774	0.070651	0.088153	1.7236e-38	-3.41585	down	Kinesin-like protein NACK1 GN=NACK1 OS=Nicotiana tabacum (Common tobacco) PE=1 SV=1	predicted protein [Hordeum vulgare subsp. vulgare]
TraesCS2A01G305600	4.84547	3.73855	4.00824	0.390126	0.209867	0.196486	1.49667e-49	-4.10494	down	Probable L-ascorbate peroxidase 7, chloroplastic (Precursor) GN=OSJNBb0086G13.10 OS=Oryza sativa subsp. japonica (Rice) PE=2 SV=1	predicted protein [Hordeum vulgare subsp. vulgare]
TraesCS2A01G305800	1.24118	1.22774	1.17578	0	0.096341	0.102372	1.83445e-12	-3.88947	down	PsbP domain-containing protein 2, chloroplastic (Precursor) GN=PPD2 OS=Arabidopsis thaliana (Mouse-ear cress) PE=1 SV=1	PsbP domain-containing protein 2, chloroplastic [Triticum urartu]
TraesCS2A01G305900	2.74425	2.6218	1.75919	0.685282	0.195379	0.108769	5.36417e-08	-2.78328	down	Amino-acid permease BAT1 GN=F10A8.5 OS=Arabidopsis thaliana (Mouse-ear cress) PE=2 SV=2	predicted protein [Hordeum vulgare subsp. vulgare]
TraesCS2A01G306100	1.52079	1.31668	2.09787	0.064397	0.068864	0.04588	7.3885e-20	-4.4668	down	Glutathione S-transferase TCHQD GN=TCHQD OS=Arabidopsis thaliana (Mouse-ear cress) PE=2 SV=1	Tetrachloro-P-hydroquinone reductive dehalogenase [Triticum urartu]
TraesCS2A01G306200	5.56949	6.10698	5.07749	0.363856	0.076801	0.354449	8.90872e-29	-4.28323	down	--	predicted protein [Hordeum vulgare subsp. vulgare]
TraesCS2A01G306300	3.64901	5.20046	2.8538	0.265071	0.258986	0.159427	1.7773e-29	-4.11085	down	--	predicted protein [Hordeum vulgare subsp. vulgare]
TraesCS2A01G306400	36.9355	35.6885	27.7852	1.46473	0.665844	0.402188	8.35413e-22	-5.12515	down	Ultraviolet-B receptor UVR8 GN=UVR8 OS=Arabidopsis thaliana (Mouse-ear cress) PE=1 SV=1	predicted protein [Hordeum vulgare subsp. vulgare]
TraesCS2A01G307100	5.09681	4.51103	5.19302	0.401471	0.121616	0.204469	4.57263e-40	-4.38124	down	Mitogen-activated protein kinase kinase kinase YODA GN=YDA OS=Arabidopsis thaliana (Mouse-ear cress) PE=1 SV=1	predicted protein [Hordeum vulgare subsp. vulgare]
TraesCS2A01G307500	7.80755	9.55015	8.26444	1.01434	0.299006	0.542703	2.78641e-33	-3.92894	down	--	hypothetical protein TRIUR3_35101 [Triticum urartu]
TraesCS2A01G307600	0.912495	1.12726	1.0338	0.092803	0.103445	0.048618	2.61097e-23	-3.53227	down	--	Pleckstrin homology domain-containing family A member 8 [Aegilops tauschii]
TraesCS2A01G307700	5.14427	3.8733	4.49712	0.433454	0.089075	0.279198	1.99368e-30	-3.89788	down	Zinc finger CCCH domain-containing protein 28 GN=OJ000114_01.2 OS=Oryza sativa subsp. japonica (Rice) PE=2 SV=1	predicted protein [Hordeum vulgare subsp. vulgare]
TraesCS2A01G307900	8.65622	9.06127	8.66809	0.802869	0.44823	0.344478	2.80246e-50	-4.17267	down	--	hypothetical protein F775_32557 [Aegilops tauschii]
TraesCS2A01G308000	0.376187	0.360491	0.515293	0	0.042161	0.095234	1.86887e-08	-3.41981	down	--	hypothetical protein TRIUR3_32941 [Triticum urartu]
TraesCS2A01G308200	4.3196	4.62313	4.34871	0.195082	0.215757	0.213784	2.85525e-121	-4.35293	down	--	PREDICTED: DDT domain-containing protein DDB_G0282237-like [Brachypodium distachyon]
TraesCS2A01G308300	5.51343	6.35011	6.08425	0.656713	0.28628	0.161831	1.11467e-28	-3.9639	down	--	predicted protein [Hordeum vulgare subsp. vulgare]
TraesCS2A01G308600	5.57054	4.03393	4.23225	0.464534	0.215517	0.160068	7.79152e-88	-4.49913	down	Protein TIC 40, chloroplastic (Precursor) GN=TIC40 OS=Pisum sativum (Garden pea) PE=1 SV=1	predicted protein [Hordeum vulgare subsp. vulgare]
TraesCS2A01G308700	5.06055	4.80412	4.8577	0.317114	0.128888	0.139476	1.41645e-61	-4.71993	down	--	hypothetical protein F775_08429 [Aegilops tauschii]
TraesCS2A01G308800	6.9783	6.42875	6.24385	0.893084	0.467392	0.194486	2.08732e-22	-3.68074	down	Regulator of nonsense transcripts UPF3 GN=UPF3 OS=Arabidopsis thaliana (Mouse-ear cress) PE=1 SV=1	predicted protein [Hordeum vulgare subsp. vulgare]
TraesCS2A01G309200	26.9367	20.2377	24.3841	4.52703	4.68956	4.20023	1.19726e-76	-2.60893	down	--	predicted protein [Hordeum vulgare subsp. vulgare]
TraesCS2A01G309300	13.7274	12.8403	12.3781	0.842446	0.462443	0.510231	5.06746e-97	-4.5683	down	Auxin response factor 9 GN=OSJNBa0064D20.11 OS=Oryza sativa subsp. japonica (Rice) PE=2 SV=1	PREDICTED: auxin response factor 9-like [Brachypodium distachyon]
TraesCS2A01G309500	1.42239	1.087	1.56161	0.038148	0.025104	0	9.73076e-29	-5.40677	down	--	hypothetical protein F775_30346 [Aegilops tauschii]
TraesCS2A01G309600	1.28369	1.46692	1.42057	0.098065	0.03189	0.03984	1.92434e-32	-4.38666	down	--	predicted protein [Hordeum vulgare subsp. vulgare]
TraesCS2A01G309900	2.38201	2.80726	3.34251	0.544608	0.196191	0.245944	1.14452e-20	-3.23667	down	Chloride channel protein CLC-c GN=K9P8.3 OS=Arabidopsis thaliana (Mouse-ear cress) PE=1 SV=1	chloride channel 1 [Hordeum vulgare subsp. vulgare]
TraesCS2A01G310000	0.66013	0.694933	0.627482	0.051799	0.038204	0.024849	5.96741e-22	-4.042	down	Protein FAR1-RELATED SEQUENCE 11 GN=FRS11 OS=Arabidopsis thaliana (Mouse-ear cress) PE=2 SV=1	PREDICTED: protein FAR1-RELATED SEQUENCE 11 isoform X1 [Brachypodium distachyon]
TraesCS2A01G310100	2.20247	2.31455	2.00033	0.013552	0.115162	0.13255	9.06098e-18	-4.35432	down	--	hypothetical protein F775_11269 [Aegilops tauschii]
TraesCS2A01G310300	22.9954	26.7965	24.9361	6.57929	3.93716	3.81791	3.65697e-27	-2.60402	down	1,4-alpha-glucan-branching enzyme 2, chloroplastic/amyloplastic (Precursor) GN=SBE1 OS=Zea mays (Maize) PE=1 SV=1	starch branching enzyme IIb [Triticum aestivum]
TraesCS2A01G310400	6.11716	5.26923	4.29973	0.293183	0.266916	0.251924	2.25697e-65	-4.41092	down	--	predicted protein [Hordeum vulgare subsp. vulgare]
TraesCS2A01G310500	2.81545	2.58841	2.69436	0.35522	0.278582	0.276685	5.43089e-35	-3.25691	down	--	hypothetical protein TRIUR3_23206 [Triticum urartu]
TraesCS2A01G311000	36.7832	39.4763	66.8801	0	0	0	4.60023e-56	-10.8579	down	GTP-binding protein YPTM1 GN=YPTM1 OS=Zea mays (Maize) PE=2 SV=2	GTP-binding protein YPTM1 [Aegilops tauschii]
TraesCS2A01G311100	1.20455	0.954356	0.829745	0.144777	0.113615	0.024407	7.59437e-17	-3.58268	down	MADS-box transcription factor 26 GN=P0498H04.24 OS=Oryza sativa subsp. japonica (Rice) PE=2 SV=1	MADS-box transcription factor 26 [Triticum urartu]
TraesCS2A01G311200	2.37496	2.52882	3.40913	0.952407	0.250826	0.414305	9.7507e-08	-2.41956	down	Putative 12-oxophytodienoate reductase 11 GN=OPR11 OS=Oryza sativa subsp. japonica (Rice) PE=2 SV=1	12-oxophytodienoate reductase 1 [Triticum urartu]
TraesCS2A01G311300	0.870653	0.843095	0.699859	0.042469	0.089407	0.020771	8.25209e-21	-3.83844	down	Sister chromatid cohesion 1 protein 4 GN=SYN4 OS=Arabidopsis thaliana (Mouse-ear cress) PE=2 SV=1	hypothetical protein TRIUR3_24924 [Triticum urartu]
TraesCS2A01G311400	1.11107	1.09888	1.0433	0.072737	0.019446	0	5.15409e-17	-4.50472	down	--	hypothetical protein TRIUR3_14944 [Triticum urartu]
TraesCS2A01G311700	3.03775	3.24293	3.11136	0.128577	0.094382	0.184712	3.25634e-82	-4.56411	down	Chaperonin 60 subunit beta 4, chloroplastic (Precursor) GN=F28B23.11 OS=Arabidopsis thaliana (Mouse-ear cress) PE=1 SV=1	RuBisCO large subunit-binding protein subunit beta, chloroplastic [Triticum urartu]
TraesCS2A01G311900	4.80192	5.50021	5.82324	0.506568	0.128386	0.092183	1.40698e-23	-4.44894	down	--	hypothetical protein TRIUR3_12862 [Triticum urartu]
TraesCS2A01G312600	4.86718	4.64421	5.10106	0.34765	0.277581	0.175711	4.62022e-92	-4.29503	down	Ferric reduction oxidase 7, chloroplastic (Precursor) GN=FRO7 OS=Arabidopsis thaliana (Mouse-ear cress) PE=2 SV=1	ferric reductase oxidase [Hordeum vulgare]
TraesCS2A01G312700	4.74633	5.80943	4.25585	0.46049	0.108676	0.123694	3.30298e-25	-4.332	down	PHD finger protein ALFIN-LIKE 4 OS=Oryza sativa subsp. japonica (Rice) PE=2 SV=2	PHD finger protein [Aegilops tauschii]
TraesCS2A01G313000	8.26136	8.35368	8.75971	0.34673	0.587472	0.48407	3.59981e-52	-4.25994	down	--	hypothetical protein TRIUR3_31726 [Triticum urartu]
TraesCS2A01G313100	1.98994	2.76198	1.91578	0.039338	0	0	2.04378e-20	-6.07845	down	--	predicted protein [Hordeum vulgare subsp. vulgare]
TraesCS2A01G313200	2.61132	2.20189	3.19124	0.185699	0	0	0.00553141	-3.21023	down	--	PREDICTED: uncharacterized protein LOC100824249 [Brachypodium distachyon]
TraesCS2A01G313300	1.89561	2.22201	2.56966	0.079509	0.048906	0.07699	8.03057e-39	-4.96773	down	Trihelix transcription factor ASIL2 {ECO:0000305} OS=Arabidopsis thaliana (Mouse-ear cress) PE=2 SV=1	predicted protein [Hordeum vulgare subsp. vulgare]
TraesCS2A01G313500	2.06646	1.51836	2.18568	0.132417	0.048596	0.125192	2.14738e-32	-4.23028	down	3-oxoacyl-[acyl-carrier-protein] synthase I, chloroplastic (Precursor) GN=KAS12 OS=Hordeum vulgare (Barley) PE=1 SV=1	RecName: Full=3-oxoacyl-[acyl-carrier-protein] synthase I, chloroplastic; AltName: Full=Beta-ketoacyl-ACP synthase I; Short=KAS I; Flags: Precursor [Hordeum vulgare]
TraesCS2A01G313700	8.92902	8.88113	7.66163	0.665862	0.164969	0.406193	3.6846e-41	-4.30922	down	Sm-like protein LSM1B {ECO:0000305} OS=Arabidopsis thaliana (Mouse-ear cress) PE=1 SV=1	predicted protein [Hordeum vulgare subsp. vulgare]
TraesCS2A01G314300	0.729912	0.615935	0.59602	0.015445	0.014069	0.007754	4.96392e-19	-5.08337	down	Pentatricopeptide repeat-containing protein At2g06000 GN=At2g06000 OS=Arabidopsis thaliana (Mouse-ear cress) PE=2 SV=1	predicted protein [Hordeum vulgare subsp. vulgare]
TraesCS2A01G314400	5.21009	5.32152	3.74778	0.547978	0.316231	0.197473	1.83508e-26	-3.81773	down	--	hypothetical protein TRIUR3_25588 [Triticum urartu]
TraesCS2A01G314500	28.8454	30.1766	29.2459	2.84236	1.10571	1.35097	2.56308e-42	-4.20652	down	Probable signal peptidase complex subunit 2 GN=At2g39960 OS=Arabidopsis thaliana (Mouse-ear cress) PE=2 SV=1	predicted protein [Hordeum vulgare subsp. vulgare]
TraesCS2A01G314700	2.67946	2.07259	2.55334	0.140969	0.081948	0.0837	1.53331e-34	-4.53188	down	--	predicted protein [Hordeum vulgare subsp. vulgare]
TraesCS2A01G314800	8.10364	6.09125	5.90351	0.30126	0.211173	0.282923	1.39124e-86	-4.84024	down	Peptidyl-prolyl cis-trans isomerase FKBP53 GN=FKBP53 OS=Arabidopsis thaliana (Mouse-ear cress) PE=1 SV=1	FK506-binding protein 39 kDa [Aegilops tauschii]
TraesCS2A01G315100	12.2365	11.9421	9.11999	1.6939	0.62383	0.730157	9.74369e-24	-3.4823	down	Putative lipoxygenase 5 GN=OSJNBa0064H22.1 OS=Oryza sativa subsp. japonica (Rice) PE=3 SV=2	predicted protein [Hordeum vulgare subsp. vulgare]
TraesCS2A01G315300	117.863	142.313	135.952	22.8722	14.083	12.4136	8.16186e-40	-3.16967	down	Glutamate decarboxylase 1 OS=Arabidopsis thaliana (Mouse-ear cress) PE=1 SV=2	Glutamate decarboxylase 1 [Aegilops tauschii]
TraesCS2A01G315500	2.85423	1.92547	1.31866	0.044061	0.059501	0.062146	5.89963e-30	-4.76855	down	D-galacturonate reductase GN=GALUR OS=Fragaria ananassa (Strawberry) PE=1 SV=1	NAD(P)H-dependent 6&apos;-deoxychalcone synthase [Triticum urartu]
TraesCS2A01G315600	90.4692	83.6076	56.417	2.17058	0.552804	1.02869	2.2361e-24	-5.66256	down	Non-functional NADPH-dependent codeinone reductase 2 GN=COR2 OS=Papaver somniferum (Opium poppy) PE=1 SV=1	predicted protein [Hordeum vulgare subsp. vulgare]
TraesCS2A01G315700	24.9885	30.6652	16.9399	1.52928	0.476883	0.820786	3.08216e-36	-4.71884	down	Non-functional NADPH-dependent codeinone reductase 2 GN=COR2 OS=Papaver somniferum (Opium poppy) PE=1 SV=1	predicted protein [Hordeum vulgare subsp. vulgare]
TraesCS2A01G316000	5.65953	6.0359	7.73205	0	0.063268	0.016741	1.60289e-63	-7.32401	down	--	PREDICTED: uncharacterized protein LOC100836114 [Brachypodium distachyon]
TraesCS2A01G316100	3.95965	4.13707	3.31215	0.26006	0.125725	0.17283	4.40073e-47	-4.40394	down	--	hypothetical protein TRIUR3_23466 [Triticum urartu]
TraesCS2A01G316300	3.43713	3.0106	2.76129	0.207529	0.051339	0.125364	5.19912e-34	-4.38781	down	--	hypothetical protein F775_26446 [Aegilops tauschii]
TraesCS2A01G316400	1.9844	2.20501	1.88816	0.210657	0.145965	0.089669	1.4388e-42	-3.78699	down	--	hypothetical protein TRIUR3_18915 [Triticum urartu]
TraesCS2A01G316600	34.9364	77.9123	131.08	0.049757	0.018692	0.023166	1.79969e-55	-10.0243	down	Aspartic proteinase nepenthesin-2 (Precursor) GN=nep2 OS=Nepenthes gracilis (Slender pitcher plant) PE=1 SV=1	PREDICTED: aspartic proteinase nepenthesin-2-like [Brachypodium distachyon]
TraesCS2A01G316700	4.77576	6.63677	5.54202	0.435117	0.156365	0.152416	7.41086e-52	-4.50073	down	--	PREDICTED: cation transport regulator-like protein 2 [Brachypodium distachyon]
TraesCS2A01G316900	85.3883	102.425	89.6618	12.5766	7.1351	6.33716	5.50141e-43	-3.56349	down	Mitochondrial phosphate carrier protein 3, mitochondrial (Precursor) GN=MUA22_4 OS=Arabidopsis thaliana (Mouse-ear cress) PE=1 SV=1	hypothetical protein TRIUR3_07456 [Triticum urartu]
TraesCS2A01G317000	4.85261	4.98589	5.26157	0.347111	0.419449	0.260533	1.52861e-94	-3.76173	down	Zeaxanthin epoxidase, chloroplastic (Precursor) GN=OSJNBa0064H22.16 OS=Oryza sativa subsp. japonica (Rice) PE=2 SV=1	predicted protein [Hordeum vulgare subsp. vulgare]
TraesCS2A01G317200	3.34432	3.65107	3.50042	0.175906	0.128263	0.078818	3.75485e-78	-4.72365	down	Probable protein phosphatase 2C 40 GN=OSJNBa0064H22.20 OS=Oryza sativa subsp. japonica (Rice) PE=3 SV=3	predicted protein [Hordeum vulgare subsp. vulgare]
TraesCS2A01G317400	1.05342	3.69073	27.4529	0.012385	0.009202	0.011991	4.72982e-09	-5.78859	down	Probable carboxylesterase 2 GN=CXE2 OS=Arabidopsis thaliana (Mouse-ear cress) PE=2 SV=1	predicted protein [Hordeum vulgare subsp. vulgare]
TraesCS2A01G317700	16.6865	13.8583	16.1728	2.30755	1.24289	1.3599	2.78639e-44	-3.40189	down	Polyadenylate-binding protein RBP47 GN=RBP47 OS=Nicotiana plumbaginifolia (Leadwort-leaved tobacco) PE=1 SV=1	PREDICTED: polyadenylate-binding protein RBP47-like [Brachypodium distachyon]
TraesCS2A01G317900	14.384	16.369	10.7728	1.40372	0.963068	1.02002	6.74034e-65	-3.74482	down	Rhodanese-like domain-containing protein 6 GN=STR6 OS=Arabidopsis thaliana (Mouse-ear cress) PE=2 SV=1	PREDICTED: UPF0483 protein AGAP003155 [Brachypodium distachyon]
TraesCS2A01G318200	2.90455	1.24176	2.15357	0.111575	0.157536	0.035007	4.0708e-19	-4.25514	down	E3 ubiquitin-protein ligase ATL6 (Precursor) GN=ATL6 OS=Arabidopsis thaliana (Mouse-ear cress) PE=1 SV=2	PREDICTED: E3 ubiquitin-protein ligase ATL6-like [Brachypodium distachyon]
TraesCS2A01G318300	1.57286	2.46459	1.28749	0.161131	0.09783	0.109373	7.52601e-21	-3.82343	down	E3 ubiquitin-protein ligase RING1 GN=F12B17_270 OS=Arabidopsis thaliana (Mouse-ear cress) PE=1 SV=1	predicted protein [Hordeum vulgare subsp. vulgare]
TraesCS2A01G318800	9.0169	13.2098	8.9863	1.67445	1.49257	0.65452	1.11241e-19	-3.11712	down	--	hypothetical protein TRIUR3_18331 [Triticum urartu]
TraesCS2A01G318900	147.301	149.977	147.306	7.71551	4.29738	4.04073	4.11212e-92	-4.90725	down	Histone H3.3 OS=Vitis vinifera (Grape) PE=2 SV=3	hypothetical protein CARUB_v10002094mg, partial [Capsella rubella]
TraesCS2A01G319000	2.76489	2.61608	3.79306	0	0.083125	0.028939	1.26365e-09	-5.1883	down	--	hypothetical protein TRIUR3_07153 [Triticum urartu]
TraesCS2A01G319100	0.766444	1.04483	0.867069	0.034895	0	0.034608	2.12455e-21	-4.84441	down	--	PREDICTED: uncharacterized protein LOC100837836 isoform X1 [Brachypodium distachyon]
TraesCS2A01G319200	2.95815	4.34711	3.73066	1.34448	0.849997	0.545697	4.36948e-10	-2.15487	down	7-deoxyloganetin glucosyltransferase GN=UGT85A24 OS=Gardenia jasminoides (Cape jasmine) PE=1 SV=1	predicted protein [Hordeum vulgare subsp. vulgare]
TraesCS2A01G320000	1.34108	0.929593	2.10036	0.387684	0.298605	0.353774	6.02695e-09	-2.17808	down	Mitotic spindle checkpoint protein MAD2 GN=MAD2 OS=Zea mays (Maize) PE=1 SV=1	MAD2 [Triticum aestivum]
TraesCS2A01G320100	4.64873	4.6303	3.82375	0.370862	0.193701	0.1729	1.91336e-54	-4.20169	down	Trihelix transcription factor GT-1 GN=GT-1 OS=Arabidopsis thaliana (Mouse-ear cress) PE=1 SV=1	MYB-related protein [Aegilops tauschii]
TraesCS2A01G320200	14.1029	14.5028	11.0562	1.48692	0.759146	0.534324	4.84923e-32	-3.86108	down	F-box protein SKIP14 GN=SKIP14 OS=Arabidopsis thaliana (Mouse-ear cress) PE=1 SV=1	hypothetical protein TRIUR3_06986 [Triticum urartu]
TraesCS2A01G320300	5.91861	5.08963	5.35855	0.816526	0.175608	0.146063	2.58915e-13	-3.7742	down	--	PREDICTED: uncharacterized protein LOC100828448 [Brachypodium distachyon]
TraesCS2A01G320500	10.08	9.52021	10.2265	0.66477	1.453	1.31621	3.68762e-35	-3.26691	down	--	hypothetical protein F775_28993 [Aegilops tauschii]
TraesCS2A01G320700	5.86828	10.2804	6.52191	0.821342	0.243985	0.416175	2.29454e-39	-4.18909	down	Serine/threonine protein phosphatase 2A 59 kDa regulatory subunit B&apos; eta isoform GN=B&apos;ETA OS=Arabidopsis thaliana (Mouse-ear cress) PE=2 SV=1	Serine/threonine protein phosphatase 2A 59 kDa regulatory subunit B&apos; eta isoform [Aegilops tauschii]
TraesCS2A01G320800	8.42192	9.84235	9.68766	1.04862	0.416692	0.639363	4.56686e-40	-3.85005	down	26S proteasome non-ATPase regulatory subunit 6 OS=Oryza sativa subsp. japonica (Rice) PE=2 SV=1	predicted protein [Hordeum vulgare subsp. vulgare]
TraesCS2A01G320900	5.14538	4.13938	4.61339	0.268464	0.196835	0.186725	4.85386e-91	-4.54687	down	Elongator complex protein 3 OS=Oryza sativa subsp. japonica (Rice) PE=2 SV=2	putative histone acetyltransferase ELP3 [Hordeum vulgare]
TraesCS2A01G321000	3.769	3.38733	3.70544	0.179543	0.205537	0.095907	1.92764e-83	-4.60053	down	Anaphase-promoting complex subunit 2 GN=APC2 OS=Arabidopsis thaliana (Mouse-ear cress) PE=1 SV=1	Anaphase-promoting complex subunit 2 [Aegilops tauschii]
TraesCS2A01G321100	2.33181	3.16396	2.73368	0.179939	0.172788	0.203204	4.6947e-68	-3.98029	down	Potassium channel AKT1 GN=AKT1 OS=Oryza sativa subsp. indica (Rice) PE=2 SV=1	Potassium channel AKT1 [Aegilops tauschii]
TraesCS2A01G321200	5.10726	4.32364	3.89895	0.630161	0.82877	0.713449	7.14168e-55	-2.82632	down	Acyl-CoA-binding domain-containing protein 4 GN=ACBP4 OS=Arabidopsis thaliana (Mouse-ear cress) PE=1 SV=1	PREDICTED: kelch domain-containing protein 4 [Brachypodium distachyon]
TraesCS2A01G321300	121.241	105.001	191.615	0.132097	0.298213	0.157636	3.25094e-176	-9.41791	down	Very-long-chain 3-oxoacyl-CoA reductase 1 GN=F12A21.31 OS=Arabidopsis thaliana (Mouse-ear cress) PE=1 SV=1	Os04g0483500 [Oryza sativa Japonica Group]
TraesCS2A01G321500	2.71528	2.5079	2.20737	0.2243	0.091593	0.09346	1.28382e-40	-4.27253	down	--	hypothetical protein TRIUR3_24698 [Triticum urartu]
TraesCS2A01G321600	4.37693	3.86771	4.05817	0.354238	0.218099	0.283508	4.37338e-117	-4.06429	down	Uncharacterized membrane protein At3g27390 GN=At3g27390 OS=Arabidopsis thaliana (Mouse-ear cress) PE=1 SV=2	PREDICTED: uncharacterized membrane protein At3g27390-like [Brachypodium distachyon]
TraesCS2A01G322300	3.05825	3.6396	3.11358	0.292599	0.305572	0.307021	3.65895e-31	-3.51553	down	--	hypothetical protein TRIUR3_06971 [Triticum urartu]
TraesCS2A01G322400	19.7466	20.9209	18.8156	1.66432	1.33427	1.2122	6.71942e-170	-3.99805	down	Eukaryotic translation initiation factor isoform 4G-1 GN=EIF(ISO)4G1 OS=Arabidopsis thaliana (Mouse-ear cress) PE=1 SV=1	Programmed cell death protein 4 [Triticum urartu]
TraesCS2A01G322700	22.3765	21.9257	19.3143	3.01677	2.4027	1.85623	2.15375e-69	-3.43193	down	--	predicted protein [Hordeum vulgare subsp. vulgare]
TraesCS2A01G322800	5.4249	5.68166	6.2767	1.04917	0.630683	0.24292	9.26863e-15	-3.23211	down	--	predicted protein [Hordeum vulgare subsp. vulgare]
TraesCS2A01G323100	0.615862	0.474431	0.583195	0.070378	0.057389	0.063224	1.0676e-29	-3.25085	down	--	hypothetical protein TRIUR3_15123 [Triticum urartu]
TraesCS2A01G323200	6.45449	7.54069	8.31795	0.178608	0.036281	0.088968	1.66939e-78	-6.0493	down	BTB/POZ and TAZ domain-containing protein 2 GN=BT2 OS=Arabidopsis thaliana (Mouse-ear cress) PE=1 SV=1	Histone acetyltransferase HAC5 [Aegilops tauschii]
TraesCS2A01G323300	10.8569	11.4823	11.5617	1.01413	0.526047	0.60919	6.16515e-62	-4.08854	down	Peptide methionine sulfoxide reductase A2-1 OS=Oryza sativa subsp. japonica (Rice) PE=2 SV=2	predicted protein [Hordeum vulgare subsp. vulgare]
TraesCS2A01G323500	7.73137	7.83291	7.65998	1.2136	0.779605	1.08359	3.00955e-80	-3.131	down	Cyclin-T1-3 GN=CYCT1-3 OS=Oryza sativa subsp. japonica (Rice) PE=3 SV=2	hypothetical protein TRIUR3_17335 [Triticum urartu]
TraesCS2A01G323700	13.0262	12.3182	12.2254	1.30143	0.732585	0.773472	2.11336e-65	-3.88193	down	--	hypothetical protein TRIUR3_30582 [Triticum urartu]
TraesCS2A01G323800	2.29514	2.16255	1.94541	0.229134	0.125411	0.270514	2.82046e-28	-3.41846	down	--	hypothetical protein F775_32152 [Aegilops tauschii]
TraesCS2A01G324000	3.26059	3.47634	3.7319	0.372685	0.010314	0.160169	8.83216e-06	-3.69573	down	Dynein assembly factor with WDR repeat domains 1 GN=DAW1 OS=Chlamydomonas reinhardtii (Chlamydomonas smithii) PE=1 SV=1	predicted protein [Hordeum vulgare subsp. vulgare]
TraesCS2A01G324300	2.35924	1.88097	1.91481	0.122863	0.131531	0.122397	2.19209e-21	-3.86921	down	--	--
TraesCS2A01G324700	6.03547	5.54223	6.40524	0.258607	0.073556	0.111664	1.75691e-60	-5.32232	down	Probable galactinol--sucrose galactosyltransferase 2 GN=T8H10.120 OS=Arabidopsis thaliana (Mouse-ear cress) PE=2 SV=2	predicted protein [Hordeum vulgare subsp. vulgare]
TraesCS2A01G324800	9.28338	14.8278	39.0254	0.595466	0.684588	0.850863	3.56619e-14	-4.64147	down	--	predicted protein [Hordeum vulgare subsp. vulgare]
TraesCS2A01G324900	3.11776	3.43298	2.21401	0.458635	0.171352	0.155643	6.64152e-19	-3.48936	down	--	predicted protein [Hordeum vulgare subsp. vulgare]
TraesCS2A01G325100	2.14689	2.70156	1.46814	0.071674	0	0.031766	2.33265e-29	-5.55667	down	Cytochrome P450 71A9 GN=CYP71A9 OS=Glycine max (Soybean) PE=2 SV=1	predicted protein [Hordeum vulgare subsp. vulgare]
TraesCS2A01G325200	6.70919	6.6951	6.11179	0.569832	0.168437	0.255402	9.38813e-39	-4.51716	down	--	predicted protein [Hordeum vulgare subsp. vulgare]
TraesCS2A01G325300	2.38529	2.26045	2.81963	0	0.024102	0.029872	7.30918e-22	-5.85571	down	--	hypothetical protein TRIUR3_07861 [Triticum urartu]
TraesCS2A01G325400	10.9878	10.683	10.7994	1.56592	1.30893	1.05611	3.56197e-83	-3.22753	down	--	eukaryotic translation initiation factor 4B [Triticum aestivum]
TraesCS2A01G325600	44.8159	42.4123	49.1329	5.75545	3.48509	2.9492	2.29636e-48	-3.6242	down	Isocitrate dehydrogenase [NAD] regulatory subunit 1, mitochondrial (Precursor) GN=IDH1 OS=Arabidopsis thaliana (Mouse-ear cress) PE=2 SV=2	predicted protein [Hordeum vulgare subsp. vulgare]
TraesCS2A01G326200	4.26041	3.56668	4.19187	0.124505	0.089953	0.071262	6.40175e-87	-5.44233	down	--	Beta-1,4-mannosyl-glycoprotein 4-beta-N-acetylglucosaminyltransferase [Triticum urartu]
TraesCS2A01G327000	22.1683	21.0354	17.9505	1.97179	1.24631	1.27557	7.78264e-82	-4.02604	down	--	ZZ-type zinc finger-containing protein [Aegilops tauschii]
TraesCS2A01G327100	7.08245	6.65172	7.73308	0.511167	0.564473	0.496797	1.78618e-123	-3.98686	down	Plant intracellular Ras-group-related LRR protein 3 GN=OSJNBa0044K18.1 OS=Oryza sativa subsp. japonica (Rice) PE=2 SV=3	predicted protein [Hordeum vulgare subsp. vulgare]
TraesCS2A01G327200	92.1102	110.605	92.8897	8.78698	4.8144	3.99694	7.01072e-52	-4.22365	down	Phosphatidylinositol/phosphatidylcholine transfer protein SFH3 GN=SFH3 OS=Arabidopsis thaliana (Mouse-ear cress) PE=2 SV=1	predicted protein [Hordeum vulgare subsp. vulgare]
TraesCS2A01G327300	0.959364	0.981908	0.715406	0.132559	0.072836	0.086927	6.69841e-24	-3.17228	down	C2 and GRAM domain-containing protein At5g50170 GN=At5g50170 OS=Arabidopsis thaliana (Mouse-ear cress) PE=2 SV=1	hypothetical protein F775_17226 [Aegilops tauschii]
TraesCS2A01G327400	1.33407	1.0646	0.749453	0.035078	0.037511	0.017375	4.36768e-22	-4.6364	down	--	predicted protein [Hordeum vulgare subsp. vulgare]
TraesCS2A01G327600	31.0376	27.6623	30.8264	3.55851	2.26014	1.86513	2.02108e-53	-3.701	down	Primary amine oxidase (Precursor; Fragment) OS=Lens culinaris (Lentil) PE=1 SV=3	Primary amine oxidase [Triticum urartu]
TraesCS2A01G327700	1.05907	1.38377	0.992094	0.040496	0.160233	0.119553	7.84186e-17	-3.46219	down	F-box protein At1g70590 GN=At1g70590 OS=Arabidopsis thaliana (Mouse-ear cress) PE=2 SV=1	PREDICTED: F-box protein At1g70590 isoform X1 [Brachypodium distachyon]
TraesCS2A01G327900	37.9755	45.9089	36.5089	7.85031	4.63246	4.83473	6.29384e-37	-2.96185	down	2-oxoglutarate-dependent dioxygenase DAO GN=OSJNBa0022H21.12 OS=Oryza sativa subsp. japonica (Rice) PE=2 SV=2	predicted protein [Hordeum vulgare subsp. vulgare]
TraesCS2A01G328600	5.69126	5.24472	4.85809	0.462444	0.147888	0.298138	4.45312e-45	-4.12247	down	--	hypothetical protein F775_32678 [Aegilops tauschii]
TraesCS2A01G329900	26.5395	29.6597	28.084	5.45647	2.31139	2.08914	1.56102e-21	-3.21408	down	--	predicted protein [Hordeum vulgare subsp. vulgare]
TraesCS2A01G330000	5.04027	4.55687	5.21717	0.05381	0.043626	0.026232	4.5326e-122	-6.90409	down	Probably inactive leucine-rich repeat receptor-like protein kinase At5g06940 (Precursor) GN=At5g06940 OS=Arabidopsis thaliana (Mouse-ear cress) PE=3 SV=1	predicted protein [Hordeum vulgare subsp. vulgare]
TraesCS2A01G330100	3.87607	4.29816	4.12538	0.348338	0.14797	0.083166	4.95931e-30	-4.41889	down	Polyadenylate-binding protein 2 {ECO:0000303|PubMed:18479511} OS=Arabidopsis thaliana (Mouse-ear cress) PE=1 SV=1	PREDICTED: uncharacterized protein LOC100837530 [Brachypodium distachyon]
TraesCS2A01G330200	7.93303	6.40566	7.07993	0	0	0	2.14201e-50	-10.3082	down	Glycerophosphodiester phosphodiesterase GDPDL4 {ECO:0000305} (Precursor) GN=MTE17.19 OS=Arabidopsis thaliana (Mouse-ear cress) PE=1 SV=1	putative glycerophosphoryl diester phosphodiesterase 1 [Triticum urartu]
TraesCS2A01G330500	2.58414	2.8848	2.42266	0.571271	0.229927	0.339809	6.18926e-21	-2.90339	down	Probable WRKY transcription factor 2 GN=WRKY2 OS=Arabidopsis thaliana (Mouse-ear cress) PE=2 SV=1	predicted protein [Hordeum vulgare subsp. vulgare]
TraesCS2A01G330900	1.33966	1.39707	1.11573	0.043422	0.063976	0.040284	4.11564e-71	-4.78397	down	--	hypothetical protein F775_16012 [Aegilops tauschii]
TraesCS2A01G331000	3.84123	3.97749	3.51638	0.413416	0.194398	0.157886	4.42717e-37	-3.87302	down	--	predicted protein [Hordeum vulgare subsp. vulgare]
TraesCS2A01G331100	5.3924	7.15304	6.62917	2.31185	0.843916	1.25059	2.70751e-13	-2.35637	down	Probable amino acid permease 7 GN=AAP7 OS=Arabidopsis thaliana (Mouse-ear cress) PE=1 SV=1	hypothetical protein TRIUR3_19444 [Triticum urartu]
TraesCS2A01G331300	8.23338	8.81968	7.76924	0.949135	0.661962	0.496012	3.54715e-60	-3.81336	down	--	predicted protein [Hordeum vulgare subsp. vulgare]
TraesCS2A01G331400	5.28761	6.29407	5.95224	0.868431	0.748632	0.872692	1.07458e-53	-3.12051	down	Probable U6 snRNA-associated Sm-like protein LSm4 OS=Nicotiana tabacum (Common tobacco) PE=2 SV=1	predicted protein [Hordeum vulgare subsp. vulgare]
TraesCS2A01G331600	14.9951	15.3092	14.0134	1.15943	0.689519	0.678347	1.46424e-80	-4.27898	down	Ras-related protein Rab-2-B GN=RAB2B OS=Zea mays (Maize) PE=2 SV=1	small GTP-binding protein [Triticum aestivum]
TraesCS2A01G331700	3.5916	4.07662	3.34308	0.255417	0.126405	0.063398	2.23223e-40	-4.6212	down	ATP-dependent 6-phosphofructokinase 2 {ECO:0000255|HAMAP-Rule:MF_03186} GN=At5g47810 OS=Arabidopsis thaliana (Mouse-ear cress) PE=1 SV=1	predicted protein [Hordeum vulgare subsp. vulgare]
TraesCS2A01G333200	0.529654	0.505263	0.489475	0.04139	0.00812	0.007296	7.52742e-24	-4.59904	down	Kinesin KP1 GN=KP1 OS=Arabidopsis thaliana (Mouse-ear cress) PE=1 SV=2	Kinesin-4 [Aegilops tauschii]
TraesCS2A01G333300	2.19842	2.26246	2.4014	0.131654	0.036271	0.163434	7.19334e-35	-4.31766	down	--	hypothetical protein TRIUR3_13339 [Triticum urartu]
TraesCS2A01G333400	4.36518	5.11003	3.52115	0.286037	0.185559	0.118506	7.37445e-47	-4.74389	down	--	SAM domain family protein [Triticum turgidum subsp. durum]
TraesCS2A01G333500	7.05961	4.38731	6.375	0.423129	0.418128	0.402246	2.17392e-50	-3.96218	down	Peroxidase 65 (Precursor) GN=MQD22.14 OS=Arabidopsis thaliana (Mouse-ear cress) PE=2 SV=2	predicted protein [Hordeum vulgare subsp. vulgare]
TraesCS2A01G333900	0.714903	1.09105	0.816044	0	0	0.018583	1.14101e-29	-6.42802	down	Probable RNA-dependent RNA polymerase 2 GN=OSJNBb0048E02.13 OS=Oryza sativa subsp. japonica (Rice) PE=2 SV=1	predicted protein [Hordeum vulgare subsp. vulgare]
TraesCS2A01G334000	514.999	542.81	323.936	37.6784	53.19	32.2374	2.14558e-48	-3.64134	down	MLP-like protein 423 OS=Arabidopsis thaliana (Mouse-ear cress) PE=2 SV=1	salt tolerant protein [Triticum aestivum]
TraesCS2A01G334100	2.50996	2.00755	2.24252	0.148682	0.09337	0.152672	2.12085e-82	-4.23018	down	Probable RNA-dependent RNA polymerase 2 GN=OSJNBb0048E02.13 OS=Oryza sativa subsp. japonica (Rice) PE=2 SV=1	predicted protein [Hordeum vulgare subsp. vulgare]
TraesCS2A01G334200	5.20245	3.40676	5.37575	0.056908	0.064918	0.015086	3.91424e-45	-5.82365	down	--	predicted protein [Hordeum vulgare subsp. vulgare]
TraesCS2A01G334500	1.21499	1.28785	1.45378	0.07681	0.010596	0.018833	2.44144e-25	-4.63611	down	ATP-dependent zinc metalloprotease FTSH 8, chloroplastic (Precursor) OS=Arabidopsis thaliana (Mouse-ear cress) PE=1 SV=1	predicted protein [Hordeum vulgare subsp. vulgare]
TraesCS2A01G334600	26.0676	29.0303	42.6709	0.960491	0.536112	0.35673	1.22325e-67	-5.76327	down	Agmatine deiminase GN=T22D6.110 OS=Arabidopsis thaliana (Mouse-ear cress) PE=1 SV=2	predicted protein [Hordeum vulgare subsp. vulgare]
TraesCS2A01G334700	1.89384	1.41546	1.35375	0.149937	0.055806	0.054998	7.91519e-31	-4.17916	down	--	PREDICTED: uncharacterized protein LOC100830995 isoform X1 [Brachypodium distachyon]
TraesCS2A01G335000	8.25921	8.86648	6.8272	0.905061	0.439215	0.407628	5.16539e-45	-3.91815	down	--	hypothetical protein TRIUR3_30012 [Triticum urartu]
TraesCS2A01G335100	2.85302	2.2782	2.1254	0.353745	0.041917	0.200154	7.33896e-15	-3.65293	down	Poly(A)-specific ribonuclease PARN GN=F14J16.11 OS=Arabidopsis thaliana (Mouse-ear cress) PE=1 SV=2	Poly(A)-specific ribonuclease PARN [Aegilops tauschii]
TraesCS2A01G335200	4.37553	3.03	2.34237	0.16167	0.011242	0.01045	4.34108e-39	-5.69519	down	Indole-3-glycerol phosphate synthase, chloroplastic (Precursor) GN=At2g04400 OS=Arabidopsis thaliana (Mouse-ear cress) PE=2 SV=2	predicted protein [Hordeum vulgare subsp. vulgare]
TraesCS2A01G335300	2.26373	2.25211	1.4593	0.121495	0.165201	0.071812	2.30535e-33	-3.94598	down	Protection of telomeres protein 1b GN=MHF15 OS=Arabidopsis thaliana (Mouse-ear cress) PE=1 SV=1	protection of telomeres 1 protein [Triticum aestivum]
TraesCS2A01G335400	0.890832	0.66547	0.735452	0.012609	0.006926	0.012876	9.1852e-35	-5.40219	down	Chloroplastic group IIA intron splicing facilitator CRS1, chloroplastic (Precursor) GN=OJ1014_E02.14 OS=Oryza sativa subsp. japonica (Rice) PE=2 SV=1	predicted protein [Hordeum vulgare subsp. vulgare]
TraesCS2A01G335600	2.06095	1.99622	1.5938	0.137989	0	0.087886	1.24304e-20	-4.52589	down	--	PREDICTED: uncharacterized protein LOC100824659 [Brachypodium distachyon]
TraesCS2A01G335700	33.431	31.493	31.5936	3.50777	1.92728	1.32543	1.65501e-39	-4.00555	down	UBA and UBX domain-containing protein At4g15410 GN=At4g15410 OS=Arabidopsis thaliana (Mouse-ear cress) PE=1 SV=1	PREDICTED: UBA and UBX domain-containing protein At4g15410-like [Brachypodium distachyon]
TraesCS2A01G335800	6.27481	7.39202	7.50901	0.625482	0.411553	0.282029	4.99146e-57	-4.19532	down	Protein NRT1/ PTR FAMILY 6.4 GN=MIL23.23 OS=Arabidopsis thaliana (Mouse-ear cress) PE=1 SV=1	hypothetical protein SORBIDRAFT_04g024090 [Sorghum bicolor]
TraesCS2A01G336000	51.081	47.9394	43.2374	5.47617	3.03947	2.52723	3.60409e-45	-3.81347	down	Betaine aldehyde dehydrogenase OS=Hordeum vulgare (Barley) PE=2 SV=1	Betaine aldehyde dehydrogenase [Triticum urartu]
TraesCS2A01G336200	2.67336	2.65336	3.37216	0.066394	0.419617	0.047382	1.99952e-10	-3.83867	down	F-box protein At5g39250 GN=At5g39250 OS=Arabidopsis thaliana (Mouse-ear cress) PE=2 SV=1	PREDICTED: F-box protein At5g39250 [Brachypodium distachyon]
TraesCS2A01G336300	5.38608	5.64266	5.71355	0.416314	0.212229	0.176078	1.68239e-52	-4.26644	down	--	General negative regulator of transcription subunit 4 [Triticum urartu]
TraesCS2A01G336400	2.82104	2.99961	2.63959	0.131698	0.102295	0.019017	3.89216e-40	-4.82264	down	--	hypothetical protein TRIUR3_25458 [Triticum urartu]
TraesCS2A01G336500	9.61097	8.98221	10.5327	1.43743	0.477225	0.329029	3.77076e-17	-3.71216	down	Anthranilate synthase beta subunit 1, chloroplastic (Precursor) OS=Oryza sativa subsp. japonica (Rice) PE=1 SV=1	Anthranilate synthase component II [Aegilops tauschii]
TraesCS2A01G336600	5.19162	4.8586	4.80577	0.239502	0.259068	0	4.67632e-05	-3.8571	down	Vacuolar iron transporter 1.1 OS=Oryza sativa subsp. japonica (Rice) PE=2 SV=1	predicted protein [Hordeum vulgare subsp. vulgare]
TraesCS2A01G336800	1.91976	1.97089	1.57137	0.146658	0	0.057922	2.70927e-17	-4.49853	down	--	hypothetical protein F775_29421 [Aegilops tauschii]
TraesCS2A01G337000	2.46428	1.53862	2.25082	0.104312	0.037236	0	1.15507e-05	-4.18556	down	Probable inactive receptor kinase At1g48480 (Precursor) GN=RKL1 OS=Arabidopsis thaliana (Mouse-ear cress) PE=2 SV=1	predicted protein [Hordeum vulgare subsp. vulgare]
TraesCS2A01G337100	28.3471	28.1675	26.0086	1.62861	0.764697	1.31174	4.35166e-89	-4.61414	down	Prohibitin-3, mitochondrial GN=K1B16.2 OS=Arabidopsis thaliana (Mouse-ear cress) PE=1 SV=1	predicted protein [Hordeum vulgare subsp. vulgare]
TraesCS2A01G337200	2.90701	2.64173	2.87718	0.095491	0.037955	0	1.2265e-23	-5.54037	down	Dynein 8 kDa light chain, flagellar outer arm OS=Chlamydomonas reinhardtii (Chlamydomonas smithii) PE=1 SV=1	predicted protein [Hordeum vulgare subsp. vulgare]
TraesCS2A01G337300	29.6738	27.1136	34.3106	1.89912	0.915696	0.812635	1.01305e-55	-4.70321	down	14-3-3-like protein GF14-B OS=Oryza sativa subsp. japonica (Rice) PE=1 SV=2	14-3-3-like protein GF14-B [Triticum urartu]
TraesCS2A01G337600	1.58141	1.55776	1.54349	0.133551	0	0.094058	1.90885e-14	-4.05461	down	--	PREDICTED: uncharacterized protein LOC100823433 [Brachypodium distachyon]
TraesCS2A01G338000	1.07828	0.834643	1.24453	0.081568	0.104558	0.010139	5.58017e-18	-3.86617	down	--	hypothetical protein F775_23745 [Aegilops tauschii]
TraesCS2A01G338100	16.8896	15.9292	20.5675	0.18664	0.095691	0.111137	3.61071e-95	-7.05419	down	30S ribosomal protein 3, chloroplastic (Precursor) GN=PSRP3 OS=Hordeum vulgare (Barley) PE=2 SV=1	RecName: Full=30S ribosomal protein 3, chloroplastic; AltName: Full=Plastid-specific 30S ribosomal protein 3; Short=PSRP-3; Flags: Precursor [Hordeum vulgare]
TraesCS2A01G338200	1.72595	1.69052	1.2427	0.085359	0	0	0.00123113	-3.59707	down	Transcription factor MYB39 GN=dl4925c OS=Arabidopsis thaliana (Mouse-ear cress) PE=2 SV=1	R2R3-MYB protein [Triticum aestivum]
TraesCS2A01G338400	1.30734	1.34532	1.29182	0.223407	0.027277	0.136631	9.26521e-13	-3.31156	down	Cyclic pyranopterin monophosphate synthase accessory protein, mitochondrial (Precursor) GN=CNX3 OS=Arabidopsis thaliana (Mouse-ear cress) PE=1 SV=1	predicted protein [Hordeum vulgare subsp. vulgare]
TraesCS2A01G338800	1.60923	1.60327	1.93067	0.01813	0	0.028505	1.23829e-30	-6.15204	down	--	predicted protein [Hordeum vulgare subsp. vulgare]
TraesCS2A01G339200	21.0762	23.2025	20.3222	1.81003	1.48806	1.24958	1.26453e-83	-3.97331	down	60S ribosomal protein L34 GN=RPL34 OS=Nicotiana tabacum (Common tobacco) PE=2 SV=1	predicted protein [Hordeum vulgare subsp. vulgare]
TraesCS2A01G339400	2.53592	3.06861	2.91731	0.10353	0.118741	0	5.74804e-07	-4.40978	down	Protease Do-like 8, chloroplastic (Precursor) GN=DEGP8 OS=Arabidopsis thaliana (Mouse-ear cress) PE=1 SV=1	Protease Do-like 8, chloroplastic [Aegilops tauschii]
TraesCS2A01G339500	2.59183	2.66297	2.33664	0.238651	0.159521	0.236863	1.89005e-62	-3.615	down	ATP-dependent RNA helicase SUV3L, mitochondrial {ECO:0000305} (Precursor) OS=Oryza sativa subsp. japonica (Rice) PE=2 SV=2	predicted protein [Hordeum vulgare subsp. vulgare]
TraesCS2A01G339600	0.90335	1.06437	0.877236	0.118956	0.054517	0.016892	3.27318e-16	-3.74282	down	--	hypothetical protein TRIUR3_31926 [Triticum urartu]
TraesCS2A01G339700	2.15269	2.95725	2.54956	0	0.088046	0	3.03042e-20	-5.77894	down	--	hypothetical protein F775_19612 [Aegilops tauschii]
TraesCS2A01G339900	5.9695	5.94532	4.05076	0.514307	0.286321	0.553382	1.15368e-44	-3.88801	down	Probable protein phosphatase 2C 41 OS=Oryza sativa subsp. japonica (Rice) PE=2 SV=2	predicted protein [Hordeum vulgare subsp. vulgare]
TraesCS2A01G340000	5.55163	5.87869	5.28664	1.52517	1.1573	0.613963	2.09229e-30	-2.72822	down	Cryptochrome-1 OS=Arabidopsis thaliana (Mouse-ear cress) PE=1 SV=2	cryptochrome 1b [Hordeum vulgare subsp. vulgare]
TraesCS2A01G340100	5.57284	4.3373	4.4631	0.242377	0.069209	0.098431	1.01646e-55	-5.02609	down	Ubiquitin carboxyl-terminal hydrolase 4 GN=UBP4 OS=Arabidopsis thaliana (Mouse-ear cress) PE=1 SV=2	Ubiquitin carboxyl-terminal hydrolase 4 [Triticum urartu]
TraesCS2A01G340400	0.721386	0.924698	0.834256	0.173206	0.057884	0.123261	5.45417e-12	-2.64529	down	Synaptonemal complex protein 2 GN=ZYP1B OS=Arabidopsis thaliana (Mouse-ear cress) PE=2 SV=1	hypothetical protein TRIUR3_29217 [Triticum urartu]
TraesCS2A01G340700	21.2875	19.8175	15.5309	0.335786	0.240728	0.270228	4.22842e-182	-6.06864	down	Sugar transport protein 5 GN=STP5 OS=Arabidopsis thaliana (Mouse-ear cress) PE=2 SV=1	Sugar transport protein 5 [Triticum urartu]
TraesCS2A01G340900	7.2734	8.31655	8.82097	1.84486	1.15278	1.24218	4.12397e-28	-2.5576	down	Sugar transport protein 5 GN=STP5 OS=Arabidopsis thaliana (Mouse-ear cress) PE=2 SV=1	Sugar transport protein 5 [Triticum urartu]
TraesCS2A01G341500	19.1902	15.4796	19.9027	1.03361	1.09406	1.04587	4.929e-138	-4.27423	down	--	hypothetical protein F775_26102 [Aegilops tauschii]
TraesCS2A01G341800	15.2535	15.8906	13.6068	1.81959	1.21758	1.18362	6.25186e-73	-3.57457	down	Lipoyl synthase, mitochondrial {ECO:0000255|HAMAP-Rule:MF_03128} (Precursor) GN=Sb06g018660 OS=Sorghum bicolor (Sorghum) PE=3 SV=1	predicted protein [Hordeum vulgare subsp. vulgare]
TraesCS2A01G341900	4.17347	3.84459	4.10754	0.367512	0.356263	0.224428	1.94502e-84	-4.01046	down	Protein disulfide-isomerase 5-4 (Precursor) GN=T24A18.30 OS=Arabidopsis thaliana (Mouse-ear cress) PE=2 SV=1	hypothetical protein TRIUR3_27593 [Triticum urartu]
TraesCS2A01G342100	22.2494	27.1747	21.3918	4.94503	2.22454	1.81704	3.85643e-19	-3.09338	down	--	hypothetical protein F775_24450 [Aegilops tauschii]
TraesCS2A01G342600	272.33	269.527	280.913	12.5439	10.5033	10.6252	0	-4.80367	down	Chlorophyll a-b binding protein CP24 10B, chloroplastic (Precursor) GN=CAP10B OS=Solanum lycopersicum (Tomato) PE=3 SV=1	Chlorophyll a-b binding protein CP24 10A, chloroplastic [Aegilops tauschii]
TraesCS2A01G342700	2.50421	2.37753	2.21398	0.325358	0.060196	0.047213	5.65602e-13	-3.68002	down	11-beta-hydroxysteroid dehydrogenase-like 3 GN=HSD3 OS=Arabidopsis thaliana (Mouse-ear cress) PE=3 SV=1	Uncharacterized oxidoreductase C23D3.11 [Triticum urartu]
TraesCS2A01G342800	5.63279	6.26106	8.11705	0.352929	0.258459	0.145719	5.97642e-68	-4.83117	down	Gamma-glutamyltranspeptidase 1 (Precursor) GN=GGT1 OS=Arabidopsis thaliana (Mouse-ear cress) PE=2 SV=1	predicted protein [Hordeum vulgare subsp. vulgare]
TraesCS2A01G343100	12.1385	10.3862	12.0113	0.851423	0.604047	0.170654	3.17587e-33	-4.50085	down	Somatic embryogenesis receptor kinase 1 (Precursor) OS=Arabidopsis thaliana (Mouse-ear cress) PE=1 SV=2	somatic embryogenesis receptor kinase 1 [Triticum aestivum]
TraesCS2A01G343200	11.3812	10.3559	10.8806	1.03496	1.72175	0.149094	0.000109259	-3.13673	down	Probable WRKY transcription factor 19 GN=WRKY19 OS=Arabidopsis thaliana (Mouse-ear cress) PE=2 SV=1	hypothetical protein TRIUR3_18004 [Triticum urartu]
TraesCS2A01G343500	6.81991	7.35183	5.96276	1.14643	1.04626	0.878599	7.00343e-60	-2.89198	down	--	predicted protein [Hordeum vulgare subsp. vulgare]
TraesCS2A01G343600	10.9712	13.1673	16.0649	0.445599	0.314652	0.428917	1.35663e-105	-5.17048	down	--	predicted protein [Hordeum vulgare subsp. vulgare]
TraesCS2A01G343900	12.1072	12.0155	11.9585	0.54419	0.315917	0.292004	4.49699e-120	-5.09309	down	--	Aldose 1-epimerase [Aegilops tauschii]
TraesCS2A01G344000	6.22715	8.37721	7.27398	1.63791	1.27839	0.812191	7.43099e-23	-2.70962	down	--	Aldose 1-epimerase [Aegilops tauschii]
TraesCS2A01G344200	154.768	193.943	166.484	7.43531	3.92289	3.79262	9.88443e-86	-5.20651	down	Pectinesterase 28 GN=F14I23.30 OS=Arabidopsis thaliana (Mouse-ear cress) PE=2 SV=1	Putative pectinesterase/pectinesterase inhibitor 28 [Triticum urartu]
TraesCS2A01G344300	1.4767	1.31989	2.09673	0.010164	0.007149	0.011507	1.30672e-51	-6.95292	down	ABC transporter B family member 19 GN=MLD15.2 OS=Arabidopsis thaliana (Mouse-ear cress) PE=1 SV=1	predicted protein [Hordeum vulgare subsp. vulgare]
TraesCS2A01G344400	2.61142	2.76119	2.49487	0.033353	0.034111	0.020272	3.94623e-28	-5.67923	down	PsbQ-like protein 2, chloroplastic (Precursor) GN=T13O15.8 OS=Arabidopsis thaliana (Mouse-ear cress) PE=1 SV=1	Oxygen-evolving enhancer protein 3-1, chloroplastic [Aegilops tauschii]
TraesCS2A01G344500	0.995633	0.799637	0.920796	0.127843	0.009488	0.022018	4.64924e-11	-3.8398	down	Kinesin-5 GN=ATK5 OS=Arabidopsis thaliana (Mouse-ear cress) PE=2 SV=1	predicted protein [Hordeum vulgare subsp. vulgare]
TraesCS2A01G344600	138.07	141.843	148.254	7.9234	5.62516	5.43292	1.69357e-168	-4.66024	down	Glyceraldehyde-3-phosphate dehydrogenase A, chloroplastic (Precursor) GN=GAPA OS=Zea mays (Maize) PE=2 SV=1	predicted protein [Hordeum vulgare subsp. vulgare]
TraesCS2A01G344800	1.5672	1.34705	1.58608	0.200455	0	0.089892	0.00720315	-2.83231	down	--	hypothetical protein TRIUR3_14854 [Triticum urartu]
TraesCS2A01G344900	9.87408	8.96361	7.36474	0.30246	0.561778	0.248242	5.90272e-58	-4.64504	down	NAP1-related protein 1 OS=Oryza sativa subsp. japonica (Rice) PE=2 SV=1	Protein SET [Triticum urartu]
TraesCS2A01G345400	9.76407	11.206	8.77641	1.11305	0.44764	0.339023	1.30791e-26	-3.98383	down	--	hypothetical protein TRIUR3_14304 [Triticum urartu]
TraesCS2A01G345600	5.72031	6.78589	4.78329	0.15509	0.096859	0	6.10874e-42	-5.85278	down	--	predicted protein [Hordeum vulgare subsp. vulgare]
TraesCS2A01G345800	2.69422	2.94982	2.67475	0.415193	0.266712	0.129783	1.04487e-22	-3.44693	down	Kelch repeat-containing protein At3g27220 GN=At3g27220 OS=Arabidopsis thaliana (Mouse-ear cress) PE=2 SV=1	PREDICTED: kelch repeat-containing protein At3g27220-like [Brachypodium distachyon]
TraesCS2A01G346000	8.86306	8.375	8.41686	1.10225	0.86085	0.776067	1.04065e-95	-3.40842	down	Probable inactive receptor kinase At1g27190 (Precursor) GN=At1g27190 OS=Arabidopsis thaliana (Mouse-ear cress) PE=1 SV=1	predicted protein [Hordeum vulgare subsp. vulgare]
TraesCS2A01G346100	4.44233	3.87779	3.92679	0.527676	0.4639	0.330758	3.14183e-33	-3.3262	down	DNA-directed RNA polymerases II and IV subunit 5A OS=Arabidopsis thaliana (Mouse-ear cress) PE=1 SV=1	DNA-directed RNA polymerases I, II, and III subunit RPABC1 [Triticum urartu]
TraesCS2A01G346200	10.9655	12.4796	11.1502	1.35147	0.445973	0.562965	1.10792e-28	-3.94875	down	DNA-directed RNA polymerases II and IV subunit 5A OS=Arabidopsis thaliana (Mouse-ear cress) PE=1 SV=1	DNA-directed RNA polymerases I, II, and III subunit RPABC1 [Aegilops tauschii]
TraesCS2A01G346300	4.79294	4.07318	4.44458	0.380684	0.276248	0.25078	1.49494e-40	-3.94008	down	DNA-directed RNA polymerases II and IV subunit 5A OS=Arabidopsis thaliana (Mouse-ear cress) PE=1 SV=1	predicted protein [Hordeum vulgare subsp. vulgare]
TraesCS2A01G346500	3.73404	6.48162	4.18189	0.258322	0.598303	0.17295	5.32214e-18	-3.82444	down	Cyclin-dependent kinase G-2 GN=OJ991113_30.14 OS=Oryza sativa subsp. japonica (Rice) PE=2 SV=2	Cyclin-dependent kinase G-2 [Aegilops tauschii]
TraesCS2A01G346600	2.88532	2.84237	2.51235	0.199079	0.101554	0.188242	1.90683e-59	-4.24475	down	Sister chromatid cohesion 1 protein 4 GN=SYN4 OS=Arabidopsis thaliana (Mouse-ear cress) PE=2 SV=1	Sister chromatid cohesion 1 protein 3 [Triticum urartu]
TraesCS2A01G346700	3.77161	5.61146	5.19071	0.429119	0.327684	0.134177	8.55472e-27	-4.03242	down	--	hypothetical protein TRIUR3_03698 [Triticum urartu]
TraesCS2A01G346800	1.48162	1.18966	1.13001	0.057329	0.026958	0.015284	3.45386e-47	-5.12246	down	Protein FAR1-RELATED SEQUENCE 5 GN=FRS5 OS=Arabidopsis thaliana (Mouse-ear cress) PE=2 SV=1	hypothetical protein OsJ_07864 [Oryza sativa Japonica Group]
TraesCS2A01G347200	0.399765	0.408529	0.311182	0.068271	0.020963	0.027604	4.34919e-16	-3.21337	down	Pentatricopeptide repeat-containing protein At1g06710, mitochondrial (Precursor) GN=At1g06710 OS=Arabidopsis thaliana (Mouse-ear cress) PE=3 SV=1	predicted protein [Hordeum vulgare subsp. vulgare]
TraesCS2A01G347300	2.71529	2.94411	2.15214	0.054903	0	0.00376	1.6611e-19	-5.63803	down	Uncharacterized protein ycf20 GN=ycf20 OS=Pyropia yezoensis (Red alga) PE=3 SV=1	hypothetical protein TRIUR3_13773 [Triticum urartu]
TraesCS2A01G347400	7.63157	8.25199	6.93328	0.42955	0.230744	0.340102	4.22963e-96	-4.63779	down	Serine/threonine-protein kinase OXI1 GN=At3g25250 OS=Arabidopsis thaliana (Mouse-ear cress) PE=1 SV=1	PREDICTED: serine/threonine-protein kinase OXI1-like [Brachypodium distachyon]
TraesCS2A01G347600	3.9189	3.36291	3.7859	0.244374	0.12028	0.188161	1.92608e-102	-4.29384	down	--	PREDICTED: sn1-specific diacylglycerol lipase beta-like isoform X1 [Brachypodium distachyon]
TraesCS2A01G347700	3.70063	4.28077	2.66236	0.246331	0.0741	0.025417	1.51063e-08	-4.3619	down	--	hypothetical protein TRIUR3_28391 [Triticum urartu]
TraesCS2A01G347800	2.97555	3.46714	3.08787	0.065123	0.039091	0.022205	4.79917e-89	-5.94914	down	U-box domain-containing protein 7 GN=PUB7 OS=Arabidopsis thaliana (Mouse-ear cress) PE=2 SV=1	hypothetical protein F775_52588 [Aegilops tauschii]
TraesCS2A01G347900	4.22592	4.10371	4.39188	0.142662	0.045237	0.095697	2.46797e-84	-5.44919	down	Protoporphyrinogen oxidase, mitochondrial GN=PPXII OS=Nicotiana tabacum (Common tobacco) PE=1 SV=1	hypothetical protein SORBIDRAFT_06g020950 [Sorghum bicolor]
TraesCS2A01G348000	2.37962	2.08289	3.90281	0	0	0	1.24558e-34	-9.07643	down	Potassium channel AKT2 OS=Oryza sativa subsp. japonica (Rice) PE=2 SV=1	predicted protein [Hordeum vulgare subsp. vulgare]
TraesCS2A01G348100	5.38276	4.19768	3.12977	0.465028	0.29477	0.145978	8.92729e-25	-3.84833	down	Ribosome-recycling factor, chloroplastic (Precursor) GN=RRF OS=Spinacia oleracea (Spinach) PE=1 SV=1	Ribosome-recycling factor [Triticum urartu]
TraesCS2A01G348300	7.2375	5.39104	5.17737	0.244668	0.059627	0.093182	4.19598e-49	-5.44098	down	CMP-sialic acid transporter 3 GN=UTR6 OS=Arabidopsis thaliana (Mouse-ear cress) PE=2 SV=1	predicted protein [Hordeum vulgare subsp. vulgare]
TraesCS2A01G348400	2.07544	1.84423	2.09057	0.194222	0.04857	0.076878	5.72178e-29	-4.23261	down	--	hypothetical protein TRIUR3_12764 [Triticum urartu]
TraesCS2A01G348500	6.69554	7.28784	6.58934	0.297488	0.158959	0.022482	2.11166e-11	-4.84404	down	Phosphoglycolate phosphatase 1B, chloroplastic (Precursor) GN=PGLP1B OS=Arabidopsis thaliana (Mouse-ear cress) PE=1 SV=1	PREDICTED: phosphoglycolate phosphatase 1B, chloroplastic-like [Brachypodium distachyon]
TraesCS2A01G348600	2.35355	2.65227	2.32163	0.243056	0	0.193504	0.00853059	-2.87483	down	Amino acid permease 3 GN=AAP3 OS=Arabidopsis thaliana (Mouse-ear cress) PE=1 SV=2	PREDICTED: amino acid permease 3-like [Brachypodium distachyon]
TraesCS2A01G348700	5.00995	4.74359	4.31327	0.2134	0.166116	0.06	3.86144e-68	-5.05234	down	--	predicted protein [Hordeum vulgare subsp. vulgare]
TraesCS2A01G348800	1.52434	3.4034	3.34064	0.189943	0.138831	0.097833	3.92321e-23	-4.27455	down	Transcription factor bHLH113 GN=MLD14.24 OS=Arabidopsis thaliana (Mouse-ear cress) PE=2 SV=1	Transcription factor bHLH113 [Aegilops tauschii]
TraesCS2A01G348900	1.8598	2.53888	2.2384	0.056448	0	0	4.14741e-23	-6.06755	down	B-box zinc finger protein 24 {ECO:0000303|PubMed:19920209} GN=At1g06040 OS=Arabidopsis thaliana (Mouse-ear cress) PE=1 SV=1	putative zinc finger protein [Triticum aestivum]
TraesCS2A01G349100	25.0498	27.5244	26.0141	0.553276	0.511511	0.360505	8.99571e-167	-5.888	down	Probable calcium-binding protein CML22 OS=Oryza sativa subsp. japonica (Rice) PE=3 SV=1	predicted protein [Hordeum vulgare subsp. vulgare]
TraesCS2A01G349200	1.3269	1.39284	1.3442	0.06925	0.021166	0.06137	9.40679e-64	-4.81108	down	Probable serine/threonine-protein kinase GCN2 GN=GCN2 OS=Arabidopsis thaliana (Mouse-ear cress) PE=2 SV=2	GCN2-type protein kinase [Triticum aestivum]
TraesCS2A01G349300	5.80136	3.76265	4.39868	0.466203	0.677935	0.403904	4.37977e-76	-3.39036	down	--	hypothetical protein F775_32531 [Aegilops tauschii]
TraesCS2A01G349400	12.4514	13.1112	11.3629	0.976314	0.606469	0.453693	7.8931e-61	-4.26558	down	--	predicted protein [Hordeum vulgare subsp. vulgare]
TraesCS2A01G349600	10.3347	7.75691	7.00508	0.618847	0.223267	0.57432	4.28742e-75	-4.43474	down	Probable E3 ubiquitin-protein ligase ARI8 GN=ARI8 OS=Arabidopsis thaliana (Mouse-ear cress) PE=2 SV=1	predicted protein [Hordeum vulgare subsp. vulgare]
TraesCS2A01G349700	24.0201	29.7326	25.7745	5.14522	2.65009	4.29396	6.8549e-32	-2.88227	down	Mitochondrial pyruvate carrier 1 {ECO:0000305} OS=Arabidopsis thaliana (Mouse-ear cress) PE=3 SV=1	PREDICTED: mitochondrial pyruvate carrier 1 [Brachypodium distachyon]
TraesCS2A01G349800	12.9586	13.9127	12.6865	1.1259	0.809351	0.668839	1.89908e-93	-4.09238	down	Inositol transporter 1 GN=INT1 OS=Arabidopsis thaliana (Mouse-ear cress) PE=1 SV=1	putative inositol transporter 1 [Triticum urartu]
TraesCS2A01G351000	1.79053	2.10622	2.32251	0.068246	0	0.082568	1.02668e-21	-5.28827	down	--	hypothetical protein TRIUR3_14944 [Triticum urartu]
TraesCS2A01G351300	0.353204	0.544387	0.503939	0.02654	0.019343	0.027913	1.38751e-19	-4.13924	down	F-box protein At1g78280 GN=At1g78280 OS=Arabidopsis thaliana (Mouse-ear cress) PE=2 SV=3	hypothetical protein F775_12337 [Aegilops tauschii]
TraesCS2A01G352000	9.22543	8.62039	11.5113	0.344182	0.128034	0.097123	1.56729e-62	-5.62394	down	Cytochrome b561 and DOMON domain-containing protein At3g07570 (Precursor) GN=At3g07570 OS=Arabidopsis thaliana (Mouse-ear cress) PE=2 SV=1	Ferric-chelate reductase 1 [Aegilops tauschii]
TraesCS2A01G352100	1.11973	1.3598	1.86964	0	0	0	4.12021e-19	-7.23249	down	Transcription factor RF2a OS=Oryza sativa subsp. japonica (Rice) PE=1 SV=1	predicted protein [Hordeum vulgare subsp. vulgare]
TraesCS2A01G352300	3.06223	3.38977	3.05094	0.199139	0.079679	0.206228	2.29398e-46	-4.36227	down	--	hypothetical protein F775_32546 [Aegilops tauschii]
TraesCS2A01G352400	2.55056	2.47226	2.82003	0.134711	0.149883	0.153898	1.13052e-96	-3.89183	down	Protein NLP2 OS=Oryza sativa subsp. japonica (Rice) PE=2 SV=2	Protein NLP2 [Triticum urartu]
TraesCS2A01G352500	14.9173	12.505	11.4642	0.717522	0.556781	0.378262	2.96695e-95	-4.69606	down	La protein 1 GN=LA1 OS=Arabidopsis thaliana (Mouse-ear cress) PE=1 SV=1	predicted protein [Hordeum vulgare subsp. vulgare]
TraesCS2A01G352600	13.5336	12.9894	11.924	1.63559	0.7962	0.588447	4.48716e-31	-3.75784	down	6,7-dimethyl-8-ribityllumazine synthase, chloroplastic (Precursor) GN=At2g44050 OS=Arabidopsis thaliana (Mouse-ear cress) PE=2 SV=1	predicted protein [Hordeum vulgare subsp. vulgare]
TraesCS2A01G352700	1.27644	1.59218	1.60611	0.0862	0	0.022662	6.41628e-21	-5.11479	down	Ubiquitin-like-conjugating enzyme ATG10 GN=ATG10 OS=Arabidopsis thaliana (Mouse-ear cress) PE=1 SV=1	autophagy-related protein 10a [Triticum aestivum]
TraesCS2A01G352800	20.1668	18.7839	20.28	1.81077	1.73435	1.96148	1.09944e-258	-3.82016	down	Endoglucanase 12 GN=OSJNBa0067K08.14 OS=Oryza sativa subsp. japonica (Rice) PE=2 SV=2	cellulase [Hordeum vulgare subsp. vulgare]
TraesCS2A01G353000	5.42263	5.75405	6.31356	1.10874	0.572343	0.458854	6.88412e-27	-3.20859	down	--	predicted protein [Hordeum vulgare subsp. vulgare]
TraesCS2A01G353100	8.06803	5.86072	8.59498	0.377121	0.250819	0.177476	8.16772e-57	-4.8722	down	Fasciclin-like arabinogalactan protein 1 (Precursor) GN=FLA1 OS=Arabidopsis thaliana (Mouse-ear cress) PE=1 SV=1	fasciclin-like protein FLA4 [Triticum aestivum]
TraesCS2A01G353200	6.03607	6.1153	6.35619	0.558814	0.966753	0.394713	5.94308e-45	-3.68753	down	--	hypothetical protein TRIUR3_25733 [Triticum urartu]
TraesCS2A01G353300	3.29307	3.90595	2.77666	0.291687	0.72071	1.49751	1.78451e-05	-2.08483	down	Splicing factor U2af large subunit A GN=U2AF65A OS=Nicotiana plumbaginifolia (Leadwort-leaved tobacco) PE=2 SV=1	HIV Tat-specific factor 1-like protein [Aegilops tauschii]
TraesCS2A01G353400	6.63438	5.34322	9.08247	0.169965	0.187923	0.246432	1.20272e-42	-5.09846	down	--	PREDICTED: uncharacterized protein LOC100844835 [Brachypodium distachyon]
TraesCS2A01G353500	7.99993	6.78156	7.64489	0.703367	0.274526	0.072849	2.9442e-09	-4.2216	down	(+)-neomenthol dehydrogenase GN=SDR1 OS=Arabidopsis thaliana (Mouse-ear cress) PE=1 SV=1	PREDICTED: (+)-neomenthol dehydrogenase-like [Brachypodium distachyon]
TraesCS2A01G353700	0.861966	0.852424	1.00317	0.177537	0.091605	0.044725	3.78096e-27	-4.20253	down	--	hypothetical protein F775_24471 [Aegilops tauschii]
TraesCS2A01G353800	0.941247	1.01109	0.743512	0.120514	0.066997	0.046062	5.74028e-29	-3.73614	down	Pentatricopeptide repeat-containing protein At4g17616 GN=At4g17616 OS=Arabidopsis thaliana (Mouse-ear cress) PE=2 SV=1	hypothetical protein TRIUR3_30713 [Triticum urartu]
TraesCS2A01G353900	1.22929	1.87113	2.37524	0.372133	0.127562	0.218967	5.12979e-11	-2.96895	down	Zinc finger protein CONSTANS-LIKE 4 GN=COL4 OS=Arabidopsis thaliana (Mouse-ear cress) PE=2 SV=2	CONSTANS-like protein [Hordeum vulgare subsp. vulgare]
TraesCS2A01G354000	5.28519	3.10666	7.38904	0.180345	0.14042	0.140806	8.74021e-56	-4.36839	down	--	PREDICTED: uncharacterized protein LOC100824759 [Brachypodium distachyon]
TraesCS2A01G354100	2.71089	2.15312	2.515	0.584164	0.63906	0.453551	2.46e-23	-2.30924	down	Magnesium transporter MRS2-C GN=OSJNBa0029H02.22 OS=Oryza sativa subsp. japonica (Rice) PE=3 SV=3	PREDICTED: magnesium transporter MRS2-C [Brachypodium distachyon]
TraesCS2A01G354200	131.072	125.192	105.148	9.66812	5.99278	5.13322	6.79517e-72	-4.26289	down	60S ribosomal protein L23A GN=RPL23A OS=Fritillaria agrestis (Stinkbells) PE=2 SV=1	60S ribosomal protein L23a [Triticum urartu]
TraesCS2A01G354400	7.92128	10.5532	9.74095	1.84423	0.727342	0.608835	9.4588e-19	-3.32097	down	Probable protein phosphatase 2C 42 GN=OSJNBa0029H02.20 OS=Oryza sativa subsp. japonica (Rice) PE=3 SV=4	putative protein phosphatase 2C 42 [Triticum urartu]
[truncated: 3,347 more rows]
