# Supplementary material for: Cytological and molecular characterizations of a novel 2A nullisomic line derived from a widely-grown wheat cultivar Zhoumai 18 conferring male sterility
Source: PeerJ. 2020 Oct 30;8:e10275. doi: 10.7717/peerj.10275 (PMC7605228; doi:10.7717/peerj.10275)
Supplement: Table S11 [file peerj-08-10275-s012.xls]

## Sheet: Sheet1
Table S11. The putative DEG TFs between T-ST and D-ST.
Family	DEGs	D-ST/T-ST (down)	D-ST/T-ST (up)
MYB	19	13	6
C2H2	18	17	1
AP2/ERF-ERF	17	6	11
Tify	14	6	8
bHLH	13	6	7
bZIP	13	13	0
FAR1	12	12	0
NAC	10	5	5
WRKY	10	6	4
B3	8	6	2
LIM	7	7	0
C3H	6	6	0
GARP-G2-like	6	3	3
GRAS	6	6	0
MADS-MIKC	6	5	1
B3-ARF	4	4	0
C2C2-GATA	4	4	0
HB-HD-ZIP	4	2	2
PLATZ	4	4	0
Trihelix	4	4	0
C2C2-Dof	3	3	0
CAMTA	3	3	0
HSF	3	1	2
MADS-M-type	3	2	1
OFP	3	3	0
TUB	3	3	0
DBB	2	2	0
GRF	2	2	0
HB-other	2	1	1
LOB	2	2	0
RWP-RK	2	2	0
Alfin-like	1	1	0
AP2/ERF-AP2	1	1	0
AP2/ERF-RAV	1	0	1
BES1	1	1	0
C2C2-CO-like	1	1	0
E2F-DP	1	1	0
EIL	1	1	0
GeBP	1	1	0
HRT	1	1	0
MYB-related	1	1	0
NF-YA	1	1	0
NF-YB	1	1	0
S1Fa-like	1	1	0
SBP	1	1	0
TCP	1	1	0
zf-HD	1	1	0
Total	229	174	55
